# Supplementary material for: Miniaturized sample preparation on a digital microfluidics device for sensitive bottom-up microproteomics of mammalian cells using magnetic beads and mass spectrometry-compatible surfactants
Source: Royal Society of Chemistry journal article supplement (doi:10.1039/c9lc00715f), 2019-01-01
Supplement: c9lc00715f2.xlsx [file c9lc00715f2.xlsx]

## Sheet: 500 cells SDS-RG
Checked	Protein FDR Confidence: Combined	Master	Accession	Description	Exp. q-value: Combined	Sum PEP Score	Coverage [%]	# Peptides	# PSMs	# Unique Peptides	# Protein Groups	# AAs	MW [kDa]	calc. pI	Score Sequest HT: Sequest HT	# Peptides (by Search Engine): Sequest HT	Modifications
FALSE	High	Master Protein	P21333	Filamin-A OS=Homo sapiens GN=FLNA PE=1 SV=4	0	254.323	35	54	100	54	1	2647	280.6	6.06	133.61	54
FALSE	High	Master Protein	P35579	Myosin-9 OS=Homo sapiens GN=MYH9 PE=1 SV=4	0	228.401	30	50	83	45	1	1960	226.4	5.6	91.52	50
FALSE	High	Master Protein	P14618	Pyruvate kinase PKM OS=Homo sapiens GN=PKM PE=1 SV=4	0	201.934	59	31	105	31	1	531	57.9	7.84	195.95	31
FALSE	High	Master Protein	P60709	Actin, cytoplasmic 1 OS=Homo sapiens GN=ACTB PE=1 SV=1	0	185.373	59	18	253	11	1	375	41.7	5.48	427.07	18
FALSE	High	Master Protein	P13645	Keratin, type I cytoskeletal 10 OS=Homo sapiens GN=KRT10 PE=1 SV=6	0	182.627	49	24	144	23	1	584	58.8	5.21	266.4	24
FALSE	High	Master Protein	P06733	Alpha-enolase OS=Homo sapiens GN=ENO1 PE=1 SV=2	0	163.544	64	24	85	21	1	434	47.1	7.39	120.9	24
FALSE	High	Master Protein	P08238	Heat shock protein HSP 90-beta OS=Homo sapiens GN=HSP90AB1 PE=1 SV=4	0	161.364	43	26	113	18	1	724	83.2	5.03	187.9	26
FALSE	High	Master Protein	P07437	Tubulin beta chain OS=Homo sapiens GN=TUBB PE=1 SV=2	0	150.463	61	19	121	4	1	444	49.6	4.89	216.26	19
FALSE	High	Master Protein	P35527	Keratin, type I cytoskeletal 9 OS=Homo sapiens GN=KRT9 PE=1 SV=3	0	149.887	58	24	100	24	1	623	62	5.24	152.39	24
FALSE	High	Master Protein	P10809	60 kDa heat shock protein, mitochondrial OS=Homo sapiens GN=HSPD1 PE=1 SV=2	0	148.915	55	24	86	24	1	573	61	5.87	126.22	24
FALSE	High	Master Protein	P11142	Heat shock cognate 71 kDa protein OS=Homo sapiens GN=HSPA8 PE=1 SV=1	0	147.637	44	22	104	20	1	646	70.9	5.52	172.02	22
FALSE	High	Master Protein	P35908	Keratin, type II cytoskeletal 2 epidermal OS=Homo sapiens GN=KRT2 PE=1 SV=2	0	141.995	50	22	86	18	1	639	65.4	8	142.7	22
FALSE	High	Master Protein	O75369	Filamin-B OS=Homo sapiens GN=FLNB PE=1 SV=2	0	137.654	24	37	42	37	1	2602	278	5.73	44.49	37
FALSE	High	Master Protein	P68371	Tubulin beta-4B chain OS=Homo sapiens GN=TUBB4B PE=1 SV=1	0	137.574	60	18	100	1	1	445	49.8	4.89	162.51	18
FALSE	High	Master Protein	P04406	Glyceraldehyde-3-phosphate dehydrogenase OS=Homo sapiens GN=GAPDH PE=1 SV=3	0	135.254	55	16	96	16	1	335	36	8.46	169.11	16
FALSE	High	Master Protein	P04264	Keratin, type II cytoskeletal 1 OS=Homo sapiens GN=KRT1 PE=1 SV=6	0	126.091	44	23	114	20	1	644	66	8.12	238.93	23
FALSE	High	Master Protein	P11021	78 kDa glucose-regulated protein OS=Homo sapiens GN=HSPA5 PE=1 SV=2	0	115.737	38	22	50	21	1	654	72.3	5.16	60.12	22
FALSE	High	Master Protein	P13796	Plastin-2 OS=Homo sapiens GN=LCP1 PE=1 SV=6	0	114.442	41	21	70	19	1	627	70.2	5.43	120.47	21
FALSE	High	Master Protein	P04350	Tubulin beta-4A chain OS=Homo sapiens GN=TUBB4A PE=1 SV=2	0	108.362	53	14	75	1	1	444	49.6	4.88	127.23	14
FALSE	High	Master Protein	P06576	ATP synthase subunit beta, mitochondrial OS=Homo sapiens GN=ATP5B PE=1 SV=3	0	107.225	48	16	53	16	1	529	56.5	5.4	78.79	16
FALSE	High	Master Protein	P00558	Phosphoglycerate kinase 1 OS=Homo sapiens GN=PGK1 PE=1 SV=3	0	102.869	50	16	52	16	1	417	44.6	8.1	82.93	16
FALSE	High	Master Protein	O75083	WD repeat-containing protein 1 OS=Homo sapiens GN=WDR1 PE=1 SV=4	0	102.33	44	16	43	16	1	606	66.2	6.65	70.08	16
FALSE	High	Master Protein	P07900	Heat shock protein HSP 90-alpha OS=Homo sapiens GN=HSP90AA1 PE=1 SV=5	0	100.32	42	22	75	14	1	732	84.6	5.02	95.09	22
FALSE	High	Master Protein	P13639	Elongation factor 2 OS=Homo sapiens GN=EEF2 PE=1 SV=4	0	100.099	27	17	48	17	1	858	95.3	6.83	68.16	17
FALSE	High	Master Protein	P55072	Transitional endoplasmic reticulum ATPase OS=Homo sapiens GN=VCP PE=1 SV=4	0	98.374	45	24	39	24	1	806	89.3	5.26	47.67	24
FALSE	High	Master Protein	Q13813	Spectrin alpha chain, non-erythrocytic 1 OS=Homo sapiens GN=SPTAN1 PE=1 SV=3	0	96.793	15	30	32	30	1	2472	284.4	5.35	24.69	30
FALSE	High	Master Protein	P19338	Nucleolin OS=Homo sapiens GN=NCL PE=1 SV=3	0	95.558	35	20	45	20	1	710	76.6	4.7	64.99	20
FALSE	High	Master Protein	P25705	ATP synthase subunit alpha, mitochondrial OS=Homo sapiens GN=ATP5A1 PE=1 SV=1	0	87.857	37	17	51	17	1	553	59.7	9.13	70.84	17
FALSE	High	Master Protein	P26038	Moesin OS=Homo sapiens GN=MSN PE=1 SV=3	0	86.043	31	15	41	11	1	577	67.8	6.4	44.1	15
FALSE	High	Master Protein	Q13509	Tubulin beta-3 chain OS=Homo sapiens GN=TUBB3 PE=1 SV=2	0	84.68	26	10	71	1	1	450	50.4	4.93	110.35	10
FALSE	High	Master Protein	P68363	Tubulin alpha-1B chain OS=Homo sapiens GN=TUBA1B PE=1 SV=1	0	83.877	34	11	73	2	1	451	50.1	5.06	139.5	11
FALSE	High	Master Protein	P08670	Vimentin OS=Homo sapiens GN=VIM PE=1 SV=4	0	83.332	54	20	35	20	1	466	53.6	5.12	29.27	20
FALSE	High	Master Protein	P68104	Elongation factor 1-alpha 1 OS=Homo sapiens GN=EEF1A1 PE=1 SV=1	0	80.768	38	11	96	11	1	462	50.1	9.01	112.92	11
FALSE	High	Master Protein	P22314	Ubiquitin-like modifier-activating enzyme 1 OS=Homo sapiens GN=UBA1 PE=1 SV=3	0	78.136	23	17	30	17	1	1058	117.8	5.76	46.02	17
FALSE	High	Master Protein	Q9BQE3	Tubulin alpha-1C chain OS=Homo sapiens GN=TUBA1C PE=1 SV=1	0	77.808	34	11	52	2	1	449	49.9	5.1	99.8	11
FALSE	High	Master Protein	Q9Y490	Talin-1 OS=Homo sapiens GN=TLN1 PE=1 SV=3	0	76.847	14	19	27	19	1	2541	269.6	6.07	21.38	19
FALSE	High	Master Protein	Q00610	Clathrin heavy chain 1 OS=Homo sapiens GN=CLTC PE=1 SV=5	0	76.467	17	17	29	17	1	1675	191.5	5.69	35.78	17
FALSE	High	Master Protein	P04075	Fructose-bisphosphate aldolase A OS=Homo sapiens GN=ALDOA PE=1 SV=2	0	75.287	45	11	35	9	1	364	39.4	8.09	56.79	11
FALSE	High	Master Protein	P22626	Heterogeneous nuclear ribonucleoproteins A2/B1 OS=Homo sapiens GN=HNRNPA2B1 PE=1 SV=2	0	74.874	52	11	35	10	1	353	37.4	8.95	50.66	11
FALSE	High	Master Protein	P17987	T-complex protein 1 subunit alpha OS=Homo sapiens GN=TCP1 PE=1 SV=1	0	72.168	46	17	37	17	1	556	60.3	6.11	39.24	17
FALSE	High	Master Protein	P62805	Histone H4 OS=Homo sapiens GN=HIST1H4A PE=1 SV=2	0	71.341	53	11	75	11	1	103	11.4	11.36	117.43	11
FALSE	High	Master Protein	Q99832	T-complex protein 1 subunit eta OS=Homo sapiens GN=CCT7 PE=1 SV=2	0	71.175	43	16	41	16	1	543	59.3	7.65	36.28	16
FALSE	High	Master Protein	P50991	T-complex protein 1 subunit delta OS=Homo sapiens GN=CCT4 PE=1 SV=4	0	70.293	28	10	33	10	1	539	57.9	7.83	39.48	10
FALSE	High	Master Protein	P38646	Stress-70 protein, mitochondrial OS=Homo sapiens GN=HSPA9 PE=1 SV=2	0	70.004	29	14	37	14	1	679	73.6	6.16	55.05	14
FALSE	High	Master Protein	P12004	Proliferating cell nuclear antigen OS=Homo sapiens GN=PCNA PE=1 SV=1	0	68.989	63	11	33	11	1	261	28.8	4.69	48.36	11
FALSE	High	Master Protein	Q00839	Heterogeneous nuclear ribonucleoprotein U OS=Homo sapiens GN=HNRNPU PE=1 SV=6	0	68.651	20	12	43	12	1	825	90.5	6	53.84	12
FALSE	High	Master Protein	P35580	Myosin-10 OS=Homo sapiens GN=MYH10 PE=1 SV=3	0	67.81	13	19	25	14	1	1976	228.9	5.54	20.47	19
FALSE	High	Master Protein	Q92841	Probable ATP-dependent RNA helicase DDX17 OS=Homo sapiens GN=DDX17 PE=1 SV=2	0	67.072	31	19	34	15	1	729	80.2	8.27	31.76	19
FALSE	High	Master Protein	P52566	Rho GDP-dissociation inhibitor 2 OS=Homo sapiens GN=ARHGDIB PE=1 SV=3	0	64.628	51	10	37	10	1	201	23	5.21	53.53	10
FALSE	High	Master Protein	P78371	T-complex protein 1 subunit beta OS=Homo sapiens GN=CCT2 PE=1 SV=4	0	64.582	39	12	26	12	1	535	57.5	6.46	40.53	12
FALSE	High	Master Protein	Q01082	Spectrin beta chain, non-erythrocytic 1 OS=Homo sapiens GN=SPTBN1 PE=1 SV=2	0	62.669	12	20	27	20	1	2364	274.4	5.57	18.76	20
FALSE	High	Master Protein	P63104	14-3-3 protein zeta/delta OS=Homo sapiens GN=YWHAZ PE=1 SV=1	0	61.947	44	12	27	9	1	245	27.7	4.79	37.08	12
FALSE	High	Master Protein	P20700	Lamin-B1 OS=Homo sapiens GN=LMNB1 PE=1 SV=2	0	61.094	29	17	30	15	1	586	66.4	5.16	23.27	17
FALSE	High	Master Protein	P61978	Heterogeneous nuclear ribonucleoprotein K OS=Homo sapiens GN=HNRNPK PE=1 SV=1	0	60.82	34	12	36	12	1	463	50.9	5.54	47.16	12
FALSE	High	Master Protein	P31146	Coronin-1A OS=Homo sapiens GN=CORO1A PE=1 SV=4	0	60.194	43	14	26	14	1	461	51	6.68	36.84	14
FALSE	High	Master Protein	P50990	T-complex protein 1 subunit theta OS=Homo sapiens GN=CCT8 PE=1 SV=4	0	59.343	31	14	28	14	1	548	59.6	5.6	28.5	14
FALSE	High	Master Protein	P21796	Voltage-dependent anion-selective channel protein 1 OS=Homo sapiens GN=VDAC1 PE=1 SV=2	0	59.262	52	12	20	12	1	283	30.8	8.54	29.07	12
FALSE	High	Master Protein	Q15233	Non-POU domain-containing octamer-binding protein OS=Homo sapiens GN=NONO PE=1 SV=4	0	59.088	38	9	31	9	1	471	54.2	8.95	25.27	9
FALSE	High	Master Protein	P34932	Heat shock 70 kDa protein 4 OS=Homo sapiens GN=HSPA4 PE=1 SV=4	0	58.385	25	14	23	13	1	840	94.3	5.19	27.23	14
FALSE	High	Master Protein	Q16555	Dihydropyrimidinase-related protein 2 OS=Homo sapiens GN=DPYSL2 PE=1 SV=1	0	56.812	38	14	21	14	1	572	62.3	6.38	22.41	14
FALSE	High	Master Protein	Q15393	Splicing factor 3B subunit 3 OS=Homo sapiens GN=SF3B3 PE=1 SV=4	0	56.355	18	16	23	16	1	1217	135.5	5.26	16.5	16
FALSE	High	Master Protein	P06748	Nucleophosmin OS=Homo sapiens GN=NPM1 PE=1 SV=2	0	56.282	38	7	29	7	1	294	32.6	4.78	43.49	7
FALSE	High	Master Protein	P11940	Polyadenylate-binding protein 1 OS=Homo sapiens GN=PABPC1 PE=1 SV=2	0	55.911	26	16	26	9	1	636	70.6	9.5	28.21	16
FALSE	High	Master Protein	P22234	Multifunctional protein ADE2 OS=Homo sapiens GN=PAICS PE=1 SV=3	0	55.712	28	10	25	10	1	425	47	7.23	33.89	10
FALSE	High	Master Protein	Q15365	Poly(rC)-binding protein 1 OS=Homo sapiens GN=PCBP1 PE=1 SV=2	0	55.169	45	7	23	6	1	356	37.5	7.09	34.03	7
FALSE	High	Master Protein	Q08211	ATP-dependent RNA helicase A OS=Homo sapiens GN=DHX9 PE=1 SV=4	0	54.348	16	13	23	13	1	1270	140.9	6.84	19.21	13
FALSE	High	Master Protein	P30101	Protein disulfide-isomerase A3 OS=Homo sapiens GN=PDIA3 PE=1 SV=4	0	53.845	40	15	25	15	1	505	56.7	6.35	29.79	15
FALSE	High	Master Protein	P23528	Cofilin-1 OS=Homo sapiens GN=CFL1 PE=1 SV=3	0	53.684	58	12	28	12	1	166	18.5	8.09	49.36	12
FALSE	High	Master Protein	P31943	Heterogeneous nuclear ribonucleoprotein H OS=Homo sapiens GN=HNRNPH1 PE=1 SV=4	0	53.561	32	9	27	7	1	449	49.2	6.3	33.98	9
FALSE	High	Master Protein	P40227	T-complex protein 1 subunit zeta OS=Homo sapiens GN=CCT6A PE=1 SV=3	0	53.004	37	14	24	14	1	531	58	6.68	16.92	14
FALSE	High	Master Protein	P11586	C-1-tetrahydrofolate synthase, cytoplasmic OS=Homo sapiens GN=MTHFD1 PE=1 SV=3	0	52.742	20	15	18	15	1	935	101.5	7.3	20.09	15
FALSE	High	Master Protein	P68032	Actin, alpha cardiac muscle 1 OS=Homo sapiens GN=ACTC1 PE=1 SV=1	0	52.515	33	10	72	3	1	377	42	5.39	85.52	10
FALSE	High	Master Protein	P12956	X-ray repair cross-complementing protein 6 OS=Homo sapiens GN=XRCC6 PE=1 SV=2	0	52.148	23	13	23	13	1	609	69.8	6.64	23.42	13
FALSE	High	Master Protein	P31946	14-3-3 protein beta/alpha OS=Homo sapiens GN=YWHAB PE=1 SV=3	0	51.851	51	11	17	7	1	246	28.1	4.83	16.36	11
FALSE	High	Master Protein	O43707	Alpha-actinin-4 OS=Homo sapiens GN=ACTN4 PE=1 SV=2	0	51.72	20	12	21	9	1	911	104.8	5.44	14.94	12
FALSE	High	Master Protein	P33991	DNA replication licensing factor MCM4 OS=Homo sapiens GN=MCM4 PE=1 SV=5	0	51.65	24	13	17	13	1	863	96.5	6.74	22.99	13
FALSE	High	Master Protein	P49321	Nuclear autoantigenic sperm protein OS=Homo sapiens GN=NASP PE=1 SV=2	0	51.169	27	11	18	11	1	788	85.2	4.3	20.72	11
FALSE	High	Master Protein	P29401	Transketolase OS=Homo sapiens GN=TKT PE=1 SV=3	0	50.99	28	10	24	10	1	623	67.8	7.66	26.39	10
FALSE	High	Master Protein	P27797	Calreticulin OS=Homo sapiens GN=CALR PE=1 SV=1	0	50.459	47	10	44	10	1	417	48.1	4.44	23.29	10
FALSE	High	Master Protein	P60174	Triosephosphate isomerase OS=Homo sapiens GN=TPI1 PE=1 SV=3	0	50.361	56	11	21	11	1	286	30.8	5.92	34.91	11
FALSE	High	Master Protein	P09972	Fructose-bisphosphate aldolase C OS=Homo sapiens GN=ALDOC PE=1 SV=2	0	50.343	33	8	18	6	1	364	39.4	6.87	25.34	8
FALSE	High	Master Protein	P62258	14-3-3 protein epsilon OS=Homo sapiens GN=YWHAE PE=1 SV=1	0	49.914	56	12	26	10	1	255	29.2	4.74	21.11	12
FALSE	High	Master Protein	P08133	Annexin A6 OS=Homo sapiens GN=ANXA6 PE=1 SV=3	0	49.697	26	11	19	11	1	673	75.8	5.6	15.5	11
FALSE	High	Master Protein	P62937	Peptidyl-prolyl cis-trans isomerase A OS=Homo sapiens GN=PPIA PE=1 SV=2	0	48.901	56	8	39	8	1	165	18	7.81	47.51	8
FALSE	High	Master Protein	P49368	T-complex protein 1 subunit gamma OS=Homo sapiens GN=CCT3 PE=1 SV=4	0	48.847	28	12	22	12	1	545	60.5	6.49	28.72	12
FALSE	High	Master Protein	P08575	Receptor-type tyrosine-protein phosphatase C OS=Homo sapiens GN=PTPRC PE=1 SV=2	0	48.832	16	15	24	15	1	1304	147.2	6.15	8.26	15
FALSE	High	Master Protein	P07737	Profilin-1 OS=Homo sapiens GN=PFN1 PE=1 SV=2	0	48.682	61	9	32	9	1	140	15	8.27	63.62	9
FALSE	High	Master Protein	Q8N163	Cell cycle and apoptosis regulator protein 2 OS=Homo sapiens GN=CCAR2 PE=1 SV=2	0	47.611	28	14	18	14	1	923	102.8	5.22	13.94	14
FALSE	High	Master Protein	P49736	DNA replication licensing factor MCM2 OS=Homo sapiens GN=MCM2 PE=1 SV=4	0	47.34	21	13	17	13	1	904	101.8	5.52	16.79	13
FALSE	High	Master Protein	P13647	Keratin, type II cytoskeletal 5 OS=Homo sapiens GN=KRT5 PE=1 SV=3	0	47.301	18	10	26	6	1	590	62.3	7.74	27.79	10
FALSE	High	Master Protein	P40926	Malate dehydrogenase, mitochondrial OS=Homo sapiens GN=MDH2 PE=1 SV=3	0	46.958	46	12	25	12	1	338	35.5	8.68	35.23	12
FALSE	High	Master Protein	P09874	Poly [ADP-ribose] polymerase 1 OS=Homo sapiens GN=PARP1 PE=1 SV=4	0	46.904	19	13	16	13	1	1014	113	8.88	23.36	13
FALSE	High	Master Protein	P31939	Bifunctional purine biosynthesis protein PURH OS=Homo sapiens GN=ATIC PE=1 SV=3	0	46.695	30	10	15	10	1	592	64.6	6.71	14.75	10
FALSE	High	Master Protein	Q06830	Peroxiredoxin-1 OS=Homo sapiens GN=PRDX1 PE=1 SV=1	0	46.513	55	12	24	9	1	199	22.1	8.13	22.95	12
FALSE	High	Master Protein	P14866	Heterogeneous nuclear ribonucleoprotein L OS=Homo sapiens GN=HNRNPL PE=1 SV=2	0	46.374	27	8	23	8	1	589	64.1	8.22	25.94	8
FALSE	High	Master Protein	P09651	Heterogeneous nuclear ribonucleoprotein A1 OS=Homo sapiens GN=HNRNPA1 PE=1 SV=5	0	46.354	37	9	38	8	1	372	38.7	9.13	44.47	9
FALSE	High	Master Protein	Q8TEM1	Nuclear pore membrane glycoprotein 210 OS=Homo sapiens GN=NUP210 PE=1 SV=3	0	46.029	9	11	14	11	1	1887	205	6.81	25.81	11
FALSE	High	Master Protein	P07195	L-lactate dehydrogenase B chain OS=Homo sapiens GN=LDHB PE=1 SV=2	0	45.825	34	9	26	8	1	334	36.6	6.05	39.55	9
FALSE	High	Master Protein	P60842	Eukaryotic initiation factor 4A-I OS=Homo sapiens GN=EIF4A1 PE=1 SV=1	0	45.813	31	10	24	4	1	406	46.1	5.48	17.61	10
FALSE	High	Master Protein	P48643	T-complex protein 1 subunit epsilon OS=Homo sapiens GN=CCT5 PE=1 SV=1	0	45.314	34	11	23	11	1	541	59.6	5.66	19.14	11
FALSE	High	Master Protein	P02533	Keratin, type I cytoskeletal 14 OS=Homo sapiens GN=KRT14 PE=1 SV=4	0	44.996	33	11	19	8	1	472	51.5	5.16	25.1	11
FALSE	High	Master Protein	P17844	Probable ATP-dependent RNA helicase DDX5 OS=Homo sapiens GN=DDX5 PE=1 SV=1	0	44.719	24	13	23	9	1	614	69.1	8.92	24.49	13
FALSE	High	Master Protein	P00813	Adenosine deaminase OS=Homo sapiens GN=ADA PE=1 SV=3	0	44.493	30	11	21	11	1	363	40.7	5.95	22.54	11
FALSE	High	Master Protein	P25205	DNA replication licensing factor MCM3 OS=Homo sapiens GN=MCM3 PE=1 SV=3	0	44.041	20	11	14	11	1	808	90.9	5.77	17.59	11
FALSE	High	Master Protein	P18669	Phosphoglycerate mutase 1 OS=Homo sapiens GN=PGAM1 PE=1 SV=2	0	43.916	36	8	23	8	1	254	28.8	7.18	40.19	8
FALSE	High	Master Protein	Q15029	116 kDa U5 small nuclear ribonucleoprotein component OS=Homo sapiens GN=EFTUD2 PE=1 SV=1	0	43.452	19	11	15	11	1	972	109.4	5	9.78	11
FALSE	High	Master Protein	P09211	Glutathione S-transferase P OS=Homo sapiens GN=GSTP1 PE=1 SV=2	0	43.091	61	8	20	8	1	210	23.3	5.64	30.89	8
FALSE	High	Master Protein	P13489	Ribonuclease inhibitor OS=Homo sapiens GN=RNH1 PE=1 SV=2	0	42.983	32	8	11	8	1	461	49.9	4.82	19.42	8
FALSE	High	Master Protein	P13010	X-ray repair cross-complementing protein 5 OS=Homo sapiens GN=XRCC5 PE=1 SV=3	0	41.945	20	11	19	11	1	732	82.7	5.81	19.43	11
FALSE	High	Master Protein	Q7KZF4	Staphylococcal nuclease domain-containing protein 1 OS=Homo sapiens GN=SND1 PE=1 SV=1	0	41.892	17	12	15	12	1	910	101.9	7.17	18.62	12
FALSE	High	Master Protein	P27348	14-3-3 protein theta OS=Homo sapiens GN=YWHAQ PE=1 SV=1	0	41.58	42	10	19	8	1	245	27.7	4.78	15.13	10
FALSE	High	Master Protein	P14625	Endoplasmin OS=Homo sapiens GN=HSP90B1 PE=1 SV=1	0	41.192	18	10	16	10	1	803	92.4	4.84	23.36	10
FALSE	High	Master Protein	Q9UQ35	Serine/arginine repetitive matrix protein 2 OS=Homo sapiens GN=SRRM2 PE=1 SV=2	0	40.635	7	13	17	13	1	2752	299.4	12.06	15.04	13
FALSE	High	Master Protein	P12814	Alpha-actinin-1 OS=Homo sapiens GN=ACTN1 PE=1 SV=2	0	40.477	17	11	18	8	1	892	103	5.41	14.19	11
FALSE	High	Master Protein	P23246	Splicing factor, proline- and glutamine-rich OS=Homo sapiens GN=SFPQ PE=1 SV=2	0	39.87	22	10	17	10	1	707	76.1	9.44	16.23	10
FALSE	High	Master Protein	P31948	Stress-induced-phosphoprotein 1 OS=Homo sapiens GN=STIP1 PE=1 SV=1	0	39.515	24	10	17	10	1	543	62.6	6.8	14.63	10
FALSE	High	Master Protein	P11388	DNA topoisomerase 2-alpha OS=Homo sapiens GN=TOP2A PE=1 SV=3	0	39.448	12	12	14	9	1	1531	174.3	8.72	9.2	12
FALSE	High	Master Protein	P23396	40S ribosomal protein S3 OS=Homo sapiens GN=RPS3 PE=1 SV=2	0	39.24	50	11	31	11	1	243	26.7	9.66	38.93	11
FALSE	High	Master Protein	P33993	DNA replication licensing factor MCM7 OS=Homo sapiens GN=MCM7 PE=1 SV=4	0	39.172	23	11	17	11	1	719	81.3	6.46	15.42	11
FALSE	High	Master Protein	P61160	Actin-related protein 2 OS=Homo sapiens GN=ACTR2 PE=1 SV=1	0	38.87	23	7	16	7	1	394	44.7	6.74	16.48	7
FALSE	High	Master Protein	Q99536	Synaptic vesicle membrane protein VAT-1 homolog OS=Homo sapiens GN=VAT1 PE=1 SV=2	0	38.826	35	8	15	8	1	393	41.9	6.29	29.61	8
FALSE	High	Master Protein	Q99497	Protein DJ-1 OS=Homo sapiens GN=PARK7 PE=1 SV=2	0	38.626	42	7	15	7	1	189	19.9	6.79	21.77	7
FALSE	High	Master Protein	P26641	Elongation factor 1-gamma OS=Homo sapiens GN=EEF1G PE=1 SV=3	0	38.518	19	7	19	7	1	437	50.1	6.67	29.09	7
FALSE	High	Master Protein	P62241	40S ribosomal protein S8 OS=Homo sapiens GN=RPS8 PE=1 SV=2	0	38.399	42	8	16	8	1	208	24.2	10.32	26.08	8
FALSE	High	Master Protein	P42166	Lamina-associated polypeptide 2, isoform alpha OS=Homo sapiens GN=TMPO PE=1 SV=2	0	38.123	20	9	14	3	1	694	75.4	7.66	13.12	9
FALSE	High	Master Protein	Q14980	Nuclear mitotic apparatus protein 1 OS=Homo sapiens GN=NUMA1 PE=1 SV=2	0	37.647	7	10	11	10	1	2115	238.1	5.78	11.67	10
FALSE	High	Master Protein	P08865	40S ribosomal protein SA OS=Homo sapiens GN=RPSA PE=1 SV=4	0	37.378	40	7	15	7	1	295	32.8	4.87	29.72	7
FALSE	High	Master Protein	P04083	Annexin A1 OS=Homo sapiens GN=ANXA1 PE=1 SV=2	0	37.334	33	9	10	9	1	346	38.7	7.02	18.93	9
FALSE	High	Master Protein	Q92945	Far upstream element-binding protein 2 OS=Homo sapiens GN=KHSRP PE=1 SV=4	0	37.26	24	9	15	9	1	711	73.1	7.3	16.76	9
FALSE	High	Master Protein	Q13263	Transcription intermediary factor 1-beta OS=Homo sapiens GN=TRIM28 PE=1 SV=5	0	37.08	21	9	14	9	1	835	88.5	5.77	18.26	9
FALSE	High	Master Protein	Q13435	Splicing factor 3B subunit 2 OS=Homo sapiens GN=SF3B2 PE=1 SV=2	0	36.649	18	8	12	8	1	895	100.2	5.67	13.58	8
FALSE	High	Master Protein	Q14240	Eukaryotic initiation factor 4A-II OS=Homo sapiens GN=EIF4A2 PE=1 SV=2	0	36.492	23	7	20	1	1	407	46.4	5.48	15.68	7
FALSE	High	Master Protein	P63244	Receptor of activated protein C kinase 1 OS=Homo sapiens GN=RACK1 PE=1 SV=3	0	36.296	33	8	16	8	1	317	35.1	7.69	23.9	8
FALSE	High	Master Protein	O43390	Heterogeneous nuclear ribonucleoprotein R OS=Homo sapiens GN=HNRNPR PE=1 SV=1	0	36.211	22	11	18	8	1	633	70.9	8.13	14.06	11
FALSE	High	Master Protein	P07814	Bifunctional glutamate/proline--tRNA ligase OS=Homo sapiens GN=EPRS PE=1 SV=5	0	36.094	13	11	14	11	1	1512	170.5	7.33	9.65	11
FALSE	High	Master Protein	P09104	Gamma-enolase OS=Homo sapiens GN=ENO2 PE=1 SV=3	0	36.005	19	5	15	2	1	434	47.2	5.03	27.84	5
FALSE	High	Master Protein	P46940	Ras GTPase-activating-like protein IQGAP1 OS=Homo sapiens GN=IQGAP1 PE=1 SV=1	0	35.809	9	9	14	9	1	1657	189.1	6.48	9.16	9
FALSE	High	Master Protein	Q96AE4	Far upstream element-binding protein 1 OS=Homo sapiens GN=FUBP1 PE=1 SV=3	0	35.746	22	10	16	9	1	644	67.5	7.61	10.06	10
FALSE	High	Master Protein	Q9P258	Protein RCC2 OS=Homo sapiens GN=RCC2 PE=1 SV=2	0	35.645	30	10	16	10	1	522	56	8.78	20.43	10
FALSE	High	Master Protein	P52597	Heterogeneous nuclear ribonucleoprotein F OS=Homo sapiens GN=HNRNPF PE=1 SV=3	0	35.593	25	6	17	4	1	415	45.6	5.58	26.49	6
FALSE	High	Master Protein	P53621	Coatomer subunit alpha OS=Homo sapiens GN=COPA PE=1 SV=2	0	35.441	13	11	14	11	1	1224	138.3	7.66	8.12	11
FALSE	High	Master Protein	P18754	Regulator of chromosome condensation OS=Homo sapiens GN=RCC1 PE=1 SV=1	0	35.126	34	7	11	7	1	421	44.9	7.52	13.25	7
FALSE	High	Master Protein	Q14141	Septin-6 OS=Homo sapiens GN=SEPT6 PE=1 SV=4	0	35.078	27	8	13	7	1	434	49.7	6.67	10.47	8
FALSE	High	Master Protein	Q09028	Histone-binding protein RBBP4 OS=Homo sapiens GN=RBBP4 PE=1 SV=3	0	35.03	29	8	17	4	1	425	47.6	4.89	11.71	8
FALSE	High	Master Protein	P78527	DNA-dependent protein kinase catalytic subunit OS=Homo sapiens GN=PRKDC PE=1 SV=3	0	34.973	4	11	14	11	1	4128	468.8	7.12	6.07	11
FALSE	High	Master Protein	Q13185	Chromobox protein homolog 3 OS=Homo sapiens GN=CBX3 PE=1 SV=4	0	34.853	52	7	16	5	1	183	20.8	5.33	20.11	7
FALSE	High	Master Protein	O60610	Protein diaphanous homolog 1 OS=Homo sapiens GN=DIAPH1 PE=1 SV=2	0	34.569	10	9	14	9	1	1272	141.3	5.41	14.79	9
FALSE	High	Master Protein	P15311	Ezrin OS=Homo sapiens GN=EZR PE=1 SV=4	0	34.381	17	9	17	5	1	586	69.4	6.27	22.33	9
FALSE	High	Master Protein	P14868	Aspartate--tRNA ligase, cytoplasmic OS=Homo sapiens GN=DARS PE=1 SV=2	0	34.119	22	9	12	9	1	501	57.1	6.55	10.42	9
FALSE	High	Master Protein	P05023	Sodium/potassium-transporting ATPase subunit alpha-1 OS=Homo sapiens GN=ATP1A1 PE=1 SV=1	0	34.09	11	8	8	8	1	1023	112.8	5.49	15.71	8
FALSE	High	Master Protein	O75643	U5 small nuclear ribonucleoprotein 200 kDa helicase OS=Homo sapiens GN=SNRNP200 PE=1 SV=2	0	34.076	6	10	11	10	1	2136	244.4	6.06	10.29	10
FALSE	High	Master Protein	P42167	Lamina-associated polypeptide 2, isoforms beta/gamma OS=Homo sapiens GN=TMPO PE=1 SV=2	0	34.024	26	8	14	2	1	454	50.6	9.38	9.38	8
FALSE	High	Master Protein	P04843	Dolichyl-diphosphooligosaccharide--protein glycosyltransferase subunit 1 OS=Homo sapiens GN=RPN1 PE=1 SV=1	0	33.808	16	7	14	7	1	607	68.5	6.38	16.45	7
FALSE	High	Master Protein	P48668	Keratin, type II cytoskeletal 6C OS=Homo sapiens GN=KRT6C PE=1 SV=3	0	33.297	23	10	13	2	1	564	60	8	11.54	10
FALSE	High	Master Protein	Q13310	Polyadenylate-binding protein 4 OS=Homo sapiens GN=PABPC4 PE=1 SV=1	0	33.235	13	8	15	1	1	644	70.7	9.26	18.3	8
FALSE	High	Master Protein	P45880	Voltage-dependent anion-selective channel protein 2 OS=Homo sapiens GN=VDAC2 PE=1 SV=2	0	32.94	38	8	14	8	1	294	31.5	7.56	15.15	8
FALSE	High	Master Protein	Q86UX7	Fermitin family homolog 3 OS=Homo sapiens GN=FERMT3 PE=1 SV=1	0	32.718	22	8	10	8	1	667	75.9	6.98	16.32	8
FALSE	High	Master Protein	P62753	40S ribosomal protein S6 OS=Homo sapiens GN=RPS6 PE=1 SV=1	0	32.518	26	6	14	6	1	249	28.7	10.84	20.7	6
FALSE	High	Master Protein	P35637	RNA-binding protein FUS OS=Homo sapiens GN=FUS PE=1 SV=1	0	32.161	19	7	15	5	1	526	53.4	9.36	9.79	7
FALSE	High	Master Protein	P27708	CAD protein OS=Homo sapiens GN=CAD PE=1 SV=3	0	32.11	7	10	10	10	1	2225	242.8	6.46	12.27	10
FALSE	High	Master Protein	Q00534	Cyclin-dependent kinase 6 OS=Homo sapiens GN=CDK6 PE=1 SV=1	0	32.072	26	7	15	6	1	326	36.9	6.46	15.35	7
FALSE	High	Master Protein	P16402	Histone H1.3 OS=Homo sapiens GN=HIST1H1D PE=1 SV=2	0	32.058	17	6	17	6	1	221	22.3	11.02	28.12	6
FALSE	High	Master Protein	P16949	Stathmin OS=Homo sapiens GN=STMN1 PE=1 SV=3	0	32.035	26	7	23	7	1	149	17.3	5.97	39.54	7
FALSE	High	Master Protein	Q9UNZ2	NSFL1 cofactor p47 OS=Homo sapiens GN=NSFL1C PE=1 SV=2	0	31.773	31	8	9	8	1	370	40.5	5.1	7.96	8
FALSE	High	Master Protein	P04439	HLA class I histocompatibility antigen, A-3 alpha chain OS=Homo sapiens GN=HLA-A PE=1 SV=2	0	31.379	26	5	8	2	1	365	40.8	6	20.03	5
FALSE	High	Master Protein	P0DMV9	Heat shock 70 kDa protein 1B OS=Homo sapiens GN=HSPA1B PE=1 SV=1	0	31.379	22	8	15	7	1	641	70	5.66	18.88	8
FALSE	High	Master Protein	Q01469	Fatty acid-binding protein, epidermal OS=Homo sapiens GN=FABP5 PE=1 SV=3	0	31.169	64	6	13	6	1	135	15.2	7.01	7.69	6
FALSE	High	Master Protein	Q14566	DNA replication licensing factor MCM6 OS=Homo sapiens GN=MCM6 PE=1 SV=1	0	31.083	14	9	13	9	1	821	92.8	5.41	11.03	9
FALSE	High	Master Protein	P52565	Rho GDP-dissociation inhibitor 1 OS=Homo sapiens GN=ARHGDIA PE=1 SV=3	0	30.591	23	5	13	5	1	204	23.2	5.11	12.73	5
FALSE	High	Master Protein	Q13177	Serine/threonine-protein kinase PAK 2 OS=Homo sapiens GN=PAK2 PE=1 SV=3	0	30.39	26	7	10	7	1	524	58	5.96	21.44	7
FALSE	High	Master Protein	P30050	60S ribosomal protein L12 OS=Homo sapiens GN=RPL12 PE=1 SV=1	0	30.002	59	7	14	7	1	165	17.8	9.42	19.28	7
FALSE	High	Master Protein	O75534	Cold shock domain-containing protein E1 OS=Homo sapiens GN=CSDE1 PE=1 SV=2	0	29.936	13	9	11	9	1	798	88.8	6.25	7.62	9
FALSE	High	Master Protein	P62979	Ubiquitin-40S ribosomal protein S27a OS=Homo sapiens GN=RPS27A PE=1 SV=2	0	29.799	42	6	18	6	1	156	18	9.64	29.27	6
FALSE	High	Master Protein	P04259	Keratin, type II cytoskeletal 6B OS=Homo sapiens GN=KRT6B PE=1 SV=5	0	29.796	21	9	19	1	1	564	60	8	25.06	9
FALSE	High	Master Protein	Q92598	Heat shock protein 105 kDa OS=Homo sapiens GN=HSPH1 PE=1 SV=1	0	29.773	14	8	10	6	1	858	96.8	5.39	10.15	8
FALSE	High	Master Protein	P35998	26S protease regulatory subunit 7 OS=Homo sapiens GN=PSMC2 PE=1 SV=3	0	29.658	22	7	10	7	1	433	48.6	5.95	5	7
FALSE	High	Master Protein	P50395	Rab GDP dissociation inhibitor beta OS=Homo sapiens GN=GDI2 PE=1 SV=2	0	29.529	24	7	10	6	1	445	50.6	6.47	10.8	7
FALSE	High	Master Protein	O43175	D-3-phosphoglycerate dehydrogenase OS=Homo sapiens GN=PHGDH PE=1 SV=4	0	29.289	21	9	11	9	1	533	56.6	6.71	17.36	9
FALSE	High	Master Protein	P00761	Trypsin OS=Sus scrofa PE=1 SV=1	0	29.022	21	3	27	3	1	231	24.4	7.18	72.31	3
FALSE	High	Master Protein	P49327	Fatty acid synthase OS=Homo sapiens GN=FASN PE=1 SV=3	0	29.005	5	9	10	9	1	2511	273.3	6.44	7.78	9
FALSE	High	Master Protein	O75367	Core histone macro-H2A.1 OS=Homo sapiens GN=H2AFY PE=1 SV=4	0	28.851	23	6	14	6	1	372	39.6	9.79	19.95	6
FALSE	High	Master Protein	P07237	Protein disulfide-isomerase OS=Homo sapiens GN=P4HB PE=1 SV=3	0	28.593	27	9	12	9	1	508	57.1	4.87	7.07	9
FALSE	High	Master Protein	Q16531	DNA damage-binding protein 1 OS=Homo sapiens GN=DDB1 PE=1 SV=1	0	28.575	11	7	10	7	1	1140	126.9	5.26	7.83	7
FALSE	High	Master Protein	Q9BSJ8	Extended synaptotagmin-1 OS=Homo sapiens GN=ESYT1 PE=1 SV=1	0	28.493	7	5	8	5	1	1104	122.8	5.83	8.18	5
FALSE	High	Master Protein	Q13838	Spliceosome RNA helicase DDX39B OS=Homo sapiens GN=DDX39B PE=1 SV=1	0	28.47	24	7	16	2	1	428	49	5.67	16.49	7
FALSE	High	Master Protein	Q01518	Adenylyl cyclase-associated protein 1 OS=Homo sapiens GN=CAP1 PE=1 SV=5	0	28.32	17	5	10	5	1	475	51.9	8.06	9.49	5
FALSE	High	Master Protein	P61158	Actin-related protein 3 OS=Homo sapiens GN=ACTR3 PE=1 SV=3	0	28.275	31	8	13	8	1	418	47.3	5.88	11.96	8
FALSE	High	Master Protein	P52272	Heterogeneous nuclear ribonucleoprotein M OS=Homo sapiens GN=HNRNPM PE=1 SV=3	0	27.798	17	8	14	8	1	730	77.5	8.7	15.83	8
FALSE	High	Master Protein	P51149	Ras-related protein Rab-7a OS=Homo sapiens GN=RAB7A PE=1 SV=1	0	27.739	47	7	9	7	1	207	23.5	6.7	14.9	7
FALSE	High	Master Protein	Q15181	Inorganic pyrophosphatase OS=Homo sapiens GN=PPA1 PE=1 SV=2	0	27.515	25	5	11	5	1	289	32.6	5.86	23.73	5
FALSE	High	Master Protein	O15371	Eukaryotic translation initiation factor 3 subunit D OS=Homo sapiens GN=EIF3D PE=1 SV=1	0	27.39	27	8	8	8	1	548	63.9	6.05	4.43	8
FALSE	High	Master Protein	P52209	6-phosphogluconate dehydrogenase, decarboxylating OS=Homo sapiens GN=PGD PE=1 SV=3	0	27.327	19	7	13	7	1	483	53.1	7.23	21.08	7
FALSE	High	Master Protein	P46777	60S ribosomal protein L5 OS=Homo sapiens GN=RPL5 PE=1 SV=3	0	27.255	38	7	14	7	1	297	34.3	9.72	7.79	7
FALSE	High	Master Protein	P31689	DnaJ homolog subfamily A member 1 OS=Homo sapiens GN=DNAJA1 PE=1 SV=2	0	26.979	23	6	12	6	1	397	44.8	7.08	6.86	6
FALSE	High	Master Protein	Q02413	Desmoglein-1 OS=Homo sapiens GN=DSG1 PE=1 SV=2	0	26.897	10	6	9	6	1	1049	113.7	5.03	4.18	6
FALSE	High	Master Protein	Q92974	Rho guanine nucleotide exchange factor 2 OS=Homo sapiens GN=ARHGEF2 PE=1 SV=4	0	26.856	10	7	8	7	1	986	111.5	7.27	9.38	7
FALSE	High	Master Protein	P27694	Replication protein A 70 kDa DNA-binding subunit OS=Homo sapiens GN=RPA1 PE=1 SV=2	0	26.52	18	8	10	8	1	616	68.1	7.21	9.67	8
FALSE	High	Master Protein	P08708	40S ribosomal protein S17 OS=Homo sapiens GN=RPS17 PE=1 SV=2	0	26.496	47	5	12	5	1	135	15.5	9.85	8.04	5
FALSE	High	Master Protein	Q9UJU6	Drebrin-like protein OS=Homo sapiens GN=DBNL PE=1 SV=1	0	26.279	23	8	8	8	1	430	48.2	5.05	5.27	8
FALSE	High	Master Protein	Q01813	ATP-dependent 6-phosphofructokinase, platelet type OS=Homo sapiens GN=PFKP PE=1 SV=2	0	26.233	14	8	9	7	1	784	85.5	7.55	7.27	8
FALSE	High	Master Protein	P68431	Histone H3.1 OS=Homo sapiens GN=HIST1H3A PE=1 SV=2	0	26.107	43	4	20	1	1	136	15.4	11.12	22.41	4
FALSE	High	Master Protein	Q07020	60S ribosomal protein L18 OS=Homo sapiens GN=RPL18 PE=1 SV=2	0	26.094	35	7	13	7	1	188	21.6	11.72	24.66	7
FALSE	High	Master Protein	Q15424	Scaffold attachment factor B1 OS=Homo sapiens GN=SAFB PE=1 SV=4	0	26.057	13	7	10	7	1	915	102.6	5.47	11.23	7
FALSE	High	Master Protein	P26599	Polypyrimidine tract-binding protein 1 OS=Homo sapiens GN=PTBP1 PE=1 SV=1	0	26.014	28	8	10	8	1	531	57.2	9.17	0	8
FALSE	High	Master Protein	O43776	Asparagine--tRNA ligase, cytoplasmic OS=Homo sapiens GN=NARS PE=1 SV=1	0	25.791	11	6	8	6	1	548	62.9	6.25	8.86	6
FALSE	High	Master Protein	P05388	60S acidic ribosomal protein P0 OS=Homo sapiens GN=RPLP0 PE=1 SV=1	0	25.623	24	5	9	5	1	317	34.3	5.97	20.19	5
FALSE	High	Master Protein	Q14103	Heterogeneous nuclear ribonucleoprotein D0 OS=Homo sapiens GN=HNRNPD PE=1 SV=1	0	25.507	19	7	19	5	1	355	38.4	7.81	17.43	7
FALSE	High	Master Protein	Q9NQW7	Xaa-Pro aminopeptidase 1 OS=Homo sapiens GN=XPNPEP1 PE=1 SV=3	0	25.289	24	8	9	8	1	623	69.9	5.67	1.9	8
FALSE	High	Master Protein	O60814	Histone H2B type 1-K OS=Homo sapiens GN=HIST1H2BK PE=1 SV=3	0	25.269	27	4	41	2	1	126	13.9	10.32	57.48	4
FALSE	High	Master Protein	P22392	Nucleoside diphosphate kinase B OS=Homo sapiens GN=NME2 PE=1 SV=1	0	25.203	38	4	13	4	1	152	17.3	8.41	9.87	4
FALSE	High	Master Protein	O75533	Splicing factor 3B subunit 1 OS=Homo sapiens GN=SF3B1 PE=1 SV=3	0	25.173	10	7	9	7	1	1304	145.7	7.09	1.64	7
FALSE	High	Master Protein	P25786	Proteasome subunit alpha type-1 OS=Homo sapiens GN=PSMA1 PE=1 SV=1	0	25.092	25	6	11	6	1	263	29.5	6.61	8.68	6
FALSE	High	Master Protein	P13798	Acylamino-acid-releasing enzyme OS=Homo sapiens GN=APEH PE=1 SV=4	0	25.091	14	7	8	7	1	732	81.2	5.48	7.09	7
FALSE	High	Master Protein	Q15046	Lysine--tRNA ligase OS=Homo sapiens GN=KARS PE=1 SV=3	0	25.009	15	7	10	7	1	597	68	6.35	5.86	7
FALSE	High	Master Protein	P61106	Ras-related protein Rab-14 OS=Homo sapiens GN=RAB14 PE=1 SV=4	0	24.958	40	6	7	5	1	215	23.9	6.21	13.42	6
FALSE	High	Master Protein	O00151	PDZ and LIM domain protein 1 OS=Homo sapiens GN=PDLIM1 PE=1 SV=4	0	24.95	29	7	10	7	1	329	36	7.02	7.48	7
FALSE	High	Master Protein	P29692	Elongation factor 1-delta OS=Homo sapiens GN=EEF1D PE=1 SV=5	0	24.852	30	5	11	5	1	281	31.1	5.01	12.63	5
FALSE	High	Master Protein	P41252	Isoleucine--tRNA ligase, cytoplasmic OS=Homo sapiens GN=IARS PE=1 SV=2	0	24.732	8	6	7	6	1	1262	144.4	6.15	8.8	6
FALSE	High	Master Protein	O14818	Proteasome subunit alpha type-7 OS=Homo sapiens GN=PSMA7 PE=1 SV=1	0	24.594	31	8	8	8	1	248	27.9	8.46	9.75	8
FALSE	High	Master Protein	Q9Y3F4	Serine-threonine kinase receptor-associated protein OS=Homo sapiens GN=STRAP PE=1 SV=1	0	24.585	29	6	9	6	1	350	38.4	5.12	5.63	6
FALSE	High	Master Protein	Q9UMS4	Pre-mRNA-processing factor 19 OS=Homo sapiens GN=PRPF19 PE=1 SV=1	0	24.569	21	5	12	5	1	504	55.1	6.61	7.26	5
FALSE	High	Master Protein	P00367	Glutamate dehydrogenase 1, mitochondrial OS=Homo sapiens GN=GLUD1 PE=1 SV=2	0	24.466	21	7	9	7	1	558	61.4	7.8	12.54	7
FALSE	High	Master Protein	P41091	Eukaryotic translation initiation factor 2 subunit 3 OS=Homo sapiens GN=EIF2S3 PE=1 SV=3	0	24.447	14	5	8	5	1	472	51.1	8.4	8.29	5
FALSE	High	Master Protein	P11717	Cation-independent mannose-6-phosphate receptor OS=Homo sapiens GN=IGF2R PE=1 SV=3	0	24.433	6	9	9	9	1	2491	274.2	5.94	6.19	9
FALSE	High	Master Protein	Q86V81	THO complex subunit 4 OS=Homo sapiens GN=ALYREF PE=1 SV=3	0	24.385	32	4	9	4	1	257	26.9	11.15	14.13	4
FALSE	High	Master Protein	P32969	60S ribosomal protein L9 OS=Homo sapiens GN=RPL9 PE=1 SV=1	0	24.33	37	5	10	5	1	192	21.9	9.95	14.49	5
FALSE	High	Master Protein	P04844	Dolichyl-diphosphooligosaccharide--protein glycosyltransferase subunit 2 OS=Homo sapiens GN=RPN2 PE=1 SV=3	0	24.175	10	4	6	4	1	631	69.2	5.69	14.97	4
FALSE	High	Master Protein	Q07021	Complement component 1 Q subcomponent-binding protein, mitochondrial OS=Homo sapiens GN=C1QBP PE=1 SV=1	0	24.13	24	4	12	4	1	282	31.3	4.84	24.55	4
FALSE	High	Master Protein	Q07955	Serine/arginine-rich splicing factor 1 OS=Homo sapiens GN=SRSF1 PE=1 SV=2	0	24.128	27	6	11	6	1	248	27.7	10.36	17.61	6
FALSE	High	Master Protein	P12268	Inosine-5'-monophosphate dehydrogenase 2 OS=Homo sapiens GN=IMPDH2 PE=1 SV=2	0	24.126	15	7	10	7	1	514	55.8	6.9	10.17	7
FALSE	High	Master Protein	Q9NYU2	UDP-glucose:glycoprotein glucosyltransferase 1 OS=Homo sapiens GN=UGGT1 PE=1 SV=3	0	24.036	8	7	7	7	1	1555	177.1	5.63	6.17	7
FALSE	High	Master Protein	P61981	14-3-3 protein gamma OS=Homo sapiens GN=YWHAG PE=1 SV=2	0	24.029	30	6	10	2	1	247	28.3	4.89	9.41	6
FALSE	High	Master Protein	P35606	Coatomer subunit beta' OS=Homo sapiens GN=COPB2 PE=1 SV=2	0	24.025	13	7	9	7	1	906	102.4	5.27	7.13	7
FALSE	High	Master Protein	P22102	Trifunctional purine biosynthetic protein adenosine-3 OS=Homo sapiens GN=GART PE=1 SV=1	0	24.022	16	8	8	8	1	1010	107.7	6.7	4.7	8
FALSE	High	Master Protein	Q9NR30	Nucleolar RNA helicase 2 OS=Homo sapiens GN=DDX21 PE=1 SV=5	0	24.019	15	8	9	6	1	783	87.3	9.28	10.06	8
FALSE	High	Master Protein	P23526	Adenosylhomocysteinase OS=Homo sapiens GN=AHCY PE=1 SV=4	0	23.883	23	9	11	9	1	432	47.7	6.34	10.45	9
FALSE	High	Master Protein	P52907	F-actin-capping protein subunit alpha-1 OS=Homo sapiens GN=CAPZA1 PE=1 SV=3	0	23.88	31	5	9	4	1	286	32.9	5.69	10.28	5
FALSE	High	Master Protein	P12270	Nucleoprotein TPR OS=Homo sapiens GN=TPR PE=1 SV=3	0	23.876	5	7	7	7	1	2363	267.1	5.02	5.63	7
FALSE	High	Master Protein	P46087	Probable 28S rRNA (cytosine(4447)-C(5))-methyltransferase OS=Homo sapiens GN=NOP2 PE=1 SV=2	0	23.799	13	7	7	7	1	812	89.2	9.23	10.73	7
FALSE	High	Master Protein	Q15691	Microtubule-associated protein RP/EB family member 1 OS=Homo sapiens GN=MAPRE1 PE=1 SV=3	0	23.604	33	4	7	4	1	268	30	5.14	17.32	4
FALSE	High	Master Protein	P67809	Nuclease-sensitive element-binding protein 1 OS=Homo sapiens GN=YBX1 PE=1 SV=3	0	23.54	29	5	11	4	1	324	35.9	9.88	10.8	5
FALSE	High	Master Protein	P62280	40S ribosomal protein S11 OS=Homo sapiens GN=RPS11 PE=1 SV=3	0	23.51	32	4	9	4	1	158	18.4	10.3	11.04	4
FALSE	High	Master Protein	Q16643	Drebrin OS=Homo sapiens GN=DBN1 PE=1 SV=4	0	23.499	16	6	9	6	1	649	71.4	4.45	4.38	6
FALSE	High	Master Protein	Q08945	FACT complex subunit SSRP1 OS=Homo sapiens GN=SSRP1 PE=1 SV=1	0	23.456	13	7	10	7	1	709	81	6.87	12.01	7
FALSE	High	Master Protein	P35232	Prohibitin OS=Homo sapiens GN=PHB PE=1 SV=1	0	23.416	32	6	9	6	1	272	29.8	5.76	8.52	6
FALSE	High	Master Protein	P47756	F-actin-capping protein subunit beta OS=Homo sapiens GN=CAPZB PE=1 SV=4	0	23.346	26	7	11	7	1	277	31.3	5.59	5.87	7
FALSE	High	Master Protein	P38919	Eukaryotic initiation factor 4A-III OS=Homo sapiens GN=EIF4A3 PE=1 SV=4	0	23.319	17	5	9	4	1	411	46.8	6.73	7.6	5
FALSE	High	Master Protein	P36578	60S ribosomal protein L4 OS=Homo sapiens GN=RPL4 PE=1 SV=5	0	23.28	18	5	10	5	1	427	47.7	11.06	11.05	5
FALSE	High	Master Protein	O14745	Na(+)/H(+) exchange regulatory cofactor NHE-RF1 OS=Homo sapiens GN=SLC9A3R1 PE=1 SV=4	0	23.269	30	6	8	6	1	358	38.8	5.77	12.56	6
FALSE	High	Master Protein	P39023	60S ribosomal protein L3 OS=Homo sapiens GN=RPL3 PE=1 SV=2	0	23.007	16	5	11	5	1	403	46.1	10.18	8.65	5
FALSE	High	Master Protein	Q86XP3	ATP-dependent RNA helicase DDX42 OS=Homo sapiens GN=DDX42 PE=1 SV=1	0	22.961	13	8	8	8	1	938	102.9	7.02	4.62	8
FALSE	High	Master Protein	P06899	Histone H2B type 1-J OS=Homo sapiens GN=HIST1H2BJ PE=1 SV=3	0	22.96	27	3	38	1	1	126	13.9	10.32	55.61	3
FALSE	High	Master Protein	Q8IY81	pre-rRNA processing protein FTSJ3 OS=Homo sapiens GN=FTSJ3 PE=1 SV=2	0	22.798	15	8	10	8	1	847	96.5	8.4	4.14	8
FALSE	High	Master Protein	Q06210	Glutamine--fructose-6-phosphate aminotransferase [isomerizing] 1 OS=Homo sapiens GN=GFPT1 PE=1 SV=3	0	22.779	12	6	6	6	1	699	78.8	7.11	8.81	6
FALSE	High	Master Protein	Q9Y5B9	FACT complex subunit SPT16 OS=Homo sapiens GN=SUPT16H PE=1 SV=1	0	22.762	7	6	8	6	1	1047	119.8	5.66	5.62	6
FALSE	High	Master Protein	Q15366	Poly(rC)-binding protein 2 OS=Homo sapiens GN=PCBP2 PE=1 SV=1	0	22.592	18	3	11	2	1	365	38.6	6.79	15.6	3
FALSE	High	Master Protein	Q96PK6	RNA-binding protein 14 OS=Homo sapiens GN=RBM14 PE=1 SV=2	0	22.587	14	7	11	7	1	669	69.4	9.67	7.39	7
FALSE	High	Master Protein	Q12905	Interleukin enhancer-binding factor 2 OS=Homo sapiens GN=ILF2 PE=1 SV=2	0	22.464	32	7	12	7	1	390	43	5.26	8.07	7
FALSE	High	Master Protein	P28838	Cytosol aminopeptidase OS=Homo sapiens GN=LAP3 PE=1 SV=3	0	22.436	19	7	8	7	1	519	56.1	7.93	4.12	7
FALSE	High	Master Protein	P40121	Macrophage-capping protein OS=Homo sapiens GN=CAPG PE=1 SV=2	0	22.43	26	5	7	5	1	348	38.5	6.19	7.73	5
FALSE	High	Master Protein	P10768	S-formylglutathione hydrolase OS=Homo sapiens GN=ESD PE=1 SV=2	0	22.406	36	6	10	6	1	282	31.4	7.02	2.11	6
FALSE	High	Master Protein	P61221	ATP-binding cassette sub-family E member 1 OS=Homo sapiens GN=ABCE1 PE=1 SV=1	0	22.289	20	8	11	8	1	599	67.3	8.34	6.85	8
FALSE	High	Master Protein	P48147	Prolyl endopeptidase OS=Homo sapiens GN=PREP PE=1 SV=2	0	22.264	14	6	6	6	1	710	80.6	5.86	4.6	6
FALSE	High	Master Protein	P08779	Keratin, type I cytoskeletal 16 OS=Homo sapiens GN=KRT16 PE=1 SV=4	0	22.182	20	7	9	4	1	473	51.2	5.05	7.41	7
FALSE	High	Master Protein	Q15459	Splicing factor 3A subunit 1 OS=Homo sapiens GN=SF3A1 PE=1 SV=1	0	22.07	12	7	9	7	1	793	88.8	5.22	7.67	7
FALSE	High	Master Protein	Q9NUQ9	Protein FAM49B OS=Homo sapiens GN=FAM49B PE=1 SV=1	0	22.054	19	4	8	4	1	324	36.7	6.06	8.5	4
FALSE	High	Master Protein	Q8WUM4	Programmed cell death 6-interacting protein OS=Homo sapiens GN=PDCD6IP PE=1 SV=1	0	22.053	9	6	6	6	1	868	96	6.52	8.99	6
FALSE	High	Master Protein	P07910	Heterogeneous nuclear ribonucleoproteins C1/C2 OS=Homo sapiens GN=HNRNPC PE=1 SV=4	0	22	11	3	15	3	1	306	33.7	5.08	30.69	3
FALSE	High	Master Protein	Q71DI3	Histone H3.2 OS=Homo sapiens GN=HIST2H3A PE=1 SV=3	0	21.961	43	4	17	1	1	136	15.4	11.27	14.76	4
FALSE	High	Master Protein	O14980	Exportin-1 OS=Homo sapiens GN=XPO1 PE=1 SV=1	0	21.919	7	5	6	5	1	1071	123.3	6.06	4.76	5
FALSE	High	Master Protein	P16615	Sarcoplasmic/endoplasmic reticulum calcium ATPase 2 OS=Homo sapiens GN=ATP2A2 PE=1 SV=1	0	21.868	9	6	7	3	1	1042	114.7	5.34	5.4	6
FALSE	High	Master Protein	P0C0S8	Histone H2A type 1 OS=Homo sapiens GN=HIST1H2AG PE=1 SV=2	0	21.816	35	4	19	1	1	130	14.1	10.9	27.74	4
FALSE	High	Master Protein	O14979	Heterogeneous nuclear ribonucleoprotein D-like OS=Homo sapiens GN=HNRNPDL PE=1 SV=3	0	21.775	15	7	13	5	1	420	46.4	9.57	13.96	7
FALSE	High	Master Protein	P83916	Chromobox protein homolog 1 OS=Homo sapiens GN=CBX1 PE=1 SV=1	0	21.664	24	4	7	3	1	185	21.4	4.93	8.07	4
FALSE	High	Master Protein	Q9Y265	RuvB-like 1 OS=Homo sapiens GN=RUVBL1 PE=1 SV=1	0	21.6	25	6	7	6	1	456	50.2	6.42	6.48	6
FALSE	High	Master Protein	P67936	Tropomyosin alpha-4 chain OS=Homo sapiens GN=TPM4 PE=1 SV=3	0	21.593	38	8	10	7	1	248	28.5	4.69	5.9	8
FALSE	High	Master Protein	P62701	40S ribosomal protein S4, X isoform OS=Homo sapiens GN=RPS4X PE=1 SV=2	0	21.572	30	6	8	6	1	263	29.6	10.15	7.45	6
FALSE	High	Master Protein	P62263	40S ribosomal protein S14 OS=Homo sapiens GN=RPS14 PE=1 SV=3	0	21.537	32	5	13	5	1	151	16.3	10.05	13.6	5
FALSE	High	Master Protein	Q9Y678	Coatomer subunit gamma-1 OS=Homo sapiens GN=COPG1 PE=1 SV=1	0	21.379	9	6	7	6	1	874	97.7	5.47	9.62	6
FALSE	High	Master Protein	P52292	Importin subunit alpha-1 OS=Homo sapiens GN=KPNA2 PE=1 SV=1	0	21.372	18	5	8	5	1	529	57.8	5.4	9.7	5
FALSE	High	Master Protein	O43684	Mitotic checkpoint protein BUB3 OS=Homo sapiens GN=BUB3 PE=1 SV=1	0	21.344	26	7	8	7	1	328	37.1	6.84	6.48	7
FALSE	High	Master Protein	Q99426	Tubulin-folding cofactor B OS=Homo sapiens GN=TBCB PE=1 SV=2	0	21.344	27	5	8	5	1	244	27.3	5.15	7.85	5
FALSE	High	Master Protein	P31153	S-adenosylmethionine synthase isoform type-2 OS=Homo sapiens GN=MAT2A PE=1 SV=1	0	21.179	13	5	9	5	1	395	43.6	6.48	8.39	5
FALSE	High	Master Protein	P34897	Serine hydroxymethyltransferase, mitochondrial OS=Homo sapiens GN=SHMT2 PE=1 SV=3	0	21.032	18	7	8	7	1	504	56	8.53	8.99	7
FALSE	High	Master Protein	P22087	rRNA 2'-O-methyltransferase fibrillarin OS=Homo sapiens GN=FBL PE=1 SV=2	0	21.008	18	6	8	6	1	321	33.8	10.18	8.97	6
FALSE	High	Master Protein	P49411	Elongation factor Tu, mitochondrial OS=Homo sapiens GN=TUFM PE=1 SV=2	0	21.007	24	6	8	6	1	452	49.5	7.61	5.75	6
FALSE	High	Master Protein	Q99459	Cell division cycle 5-like protein OS=Homo sapiens GN=CDC5L PE=1 SV=2	0	20.904	16	7	7	7	1	802	92.2	8.18	4.32	7
FALSE	High	Master Protein	Q92499	ATP-dependent RNA helicase DDX1 OS=Homo sapiens GN=DDX1 PE=1 SV=2	0	20.903	9	6	7	6	1	740	82.4	7.23	3.76	6
FALSE	High	Master Protein	B0I1T2	Unconventional myosin-Ig OS=Homo sapiens GN=MYO1G PE=1 SV=2	0	20.806	8	7	8	7	1	1018	116.4	8.73	1.7	7
FALSE	High	Master Protein	P62873	Guanine nucleotide-binding protein G(I)/G(S)/G(T) subunit beta-1 OS=Homo sapiens GN=GNB1 PE=1 SV=3	0	20.523	19	4	6	4	1	340	37.4	6	10.64	4
FALSE	High	Master Protein	Q04917	14-3-3 protein eta OS=Homo sapiens GN=YWHAH PE=1 SV=4	0	20.502	23	6	9	3	1	246	28.2	4.84	8.6	6
FALSE	High	Master Protein	Q92900	Regulator of nonsense transcripts 1 OS=Homo sapiens GN=UPF1 PE=1 SV=2	0	20.493	9	7	7	7	1	1129	124.3	6.61	7.26	7
FALSE	High	Master Protein	Q12874	Splicing factor 3A subunit 3 OS=Homo sapiens GN=SF3A3 PE=1 SV=1	0	20.456	11	4	7	4	1	501	58.8	5.38	8.07	4
FALSE	High	Master Protein	Q8N1F7	Nuclear pore complex protein Nup93 OS=Homo sapiens GN=NUP93 PE=1 SV=2	0	20.444	14	9	9	9	1	819	93.4	5.72	1.62	9
FALSE	High	Master Protein	P51610	Host cell factor 1 OS=Homo sapiens GN=HCFC1 PE=1 SV=2	0	20.421	7	6	7	6	1	2035	208.6	7.46	4.89	6
FALSE	High	Master Protein	Q6P2Q9	Pre-mRNA-processing-splicing factor 8 OS=Homo sapiens GN=PRPF8 PE=1 SV=2	0	20.357	6	10	11	10	1	2335	273.4	8.84	1.86	10
FALSE	High	Master Protein	P35613	Basigin OS=Homo sapiens GN=BSG PE=1 SV=2	0	20.326	19	5	8	5	1	385	42.2	5.66	2.75	5
FALSE	High	Master Protein	P07355	Annexin A2 OS=Homo sapiens GN=ANXA2 PE=1 SV=2	0	20.259	25	6	8	6	1	339	38.6	7.75	6.34	6
FALSE	High	Master Protein	P61247	40S ribosomal protein S3a OS=Homo sapiens GN=RPS3A PE=1 SV=2	0	20.174	26	7	11	7	1	264	29.9	9.73	9.33	7
FALSE	High	Master Protein	P26358	DNA (cytosine-5)-methyltransferase 1 OS=Homo sapiens GN=DNMT1 PE=1 SV=2	0	20.143	5	7	8	7	1	1616	183.1	7.75	0	7
FALSE	High	Master Protein	P06493	Cyclin-dependent kinase 1 OS=Homo sapiens GN=CDK1 PE=1 SV=3	0	20.006	21	6	8	5	1	297	34.1	8.4	9.08	6
FALSE	High	Master Protein	P62424	60S ribosomal protein L7a OS=Homo sapiens GN=RPL7A PE=1 SV=2	0	19.982	22	6	9	6	1	266	30	10.61	8.78	6
FALSE	High	Master Protein	P61224	Ras-related protein Rap-1b OS=Homo sapiens GN=RAP1B PE=1 SV=1	0	19.909	37	5	8	2	1	184	20.8	5.78	8.26	5
FALSE	High	Master Protein	P43243	Matrin-3 OS=Homo sapiens GN=MATR3 PE=1 SV=2	0	19.887	11	5	8	5	1	847	94.6	6.25	6.3	5
FALSE	High	Master Protein	Q5JWF2	Guanine nucleotide-binding protein G(s) subunit alpha isoforms XLas OS=Homo sapiens GN=GNAS PE=1 SV=2	0	19.808	8	6	8	5	1	1037	111	5.03	6.99	6
FALSE	High	Master Protein	P62995	Transformer-2 protein homolog beta OS=Homo sapiens GN=TRA2B PE=1 SV=1	0	19.778	19	4	8	4	1	288	33.6	11.25	7.96	4
FALSE	High	Master Protein	Q9NY33	Dipeptidyl peptidase 3 OS=Homo sapiens GN=DPP3 PE=1 SV=2	0	19.759	12	5	7	5	1	737	82.5	5.1	7.15	5
FALSE	High	Master Protein	Q16666	Gamma-interferon-inducible protein 16 OS=Homo sapiens GN=IFI16 PE=1 SV=3	0	19.748	9	6	8	6	1	785	88.2	9.28	4.69	6
FALSE	High	Master Protein	P09960	Leukotriene A-4 hydrolase OS=Homo sapiens GN=LTA4H PE=1 SV=2	0	19.676	12	5	6	5	1	611	69.2	6.18	8.91	5
FALSE	High	Master Protein	P39687	Acidic leucine-rich nuclear phosphoprotein 32 family member A OS=Homo sapiens GN=ANP32A PE=1 SV=1	0	19.593	15	4	6	4	1	249	28.6	4.09	4.6	4
FALSE	High	Master Protein	O00154	Cytosolic acyl coenzyme A thioester hydrolase OS=Homo sapiens GN=ACOT7 PE=1 SV=3	0	19.543	13	4	6	4	1	380	41.8	8.54	10.05	4
FALSE	High	Master Protein	P53396	ATP-citrate synthase OS=Homo sapiens GN=ACLY PE=1 SV=3	0	19.427	5	4	7	4	1	1101	120.8	7.33	10.46	4
FALSE	High	Master Protein	O94776	Metastasis-associated protein MTA2 OS=Homo sapiens GN=MTA2 PE=1 SV=1	0	19.382	11	5	6	5	1	668	75	9.66	7.31	5
FALSE	High	Master Protein	O00148	ATP-dependent RNA helicase DDX39A OS=Homo sapiens GN=DDX39A PE=1 SV=2	0	19.284	21	6	11	1	1	427	49.1	5.68	12.31	6
FALSE	High	Master Protein	Q14839	Chromodomain-helicase-DNA-binding protein 4 OS=Homo sapiens GN=CHD4 PE=1 SV=2	0	19.267	5	7	7	7	1	1912	217.9	5.86	4.17	7
FALSE	High	Master Protein	P62888	60S ribosomal protein L30 OS=Homo sapiens GN=RPL30 PE=1 SV=2	0	19.131	51	5	9	5	1	115	12.8	9.63	10.35	5
FALSE	High	Master Protein	Q12906	Interleukin enhancer-binding factor 3 OS=Homo sapiens GN=ILF3 PE=1 SV=3	0	19.054	13	6	8	6	1	894	95.3	8.76	3.82	6
FALSE	High	Master Protein	P31150	Rab GDP dissociation inhibitor alpha OS=Homo sapiens GN=GDI1 PE=1 SV=2	0	19.02	17	4	5	3	1	447	50.6	5.14	6.63	4
FALSE	High	Master Protein	Q14157	Ubiquitin-associated protein 2-like OS=Homo sapiens GN=UBAP2L PE=1 SV=2	0	19.016	10	5	5	5	1	1087	114.5	7.11	7.75	5
FALSE	High	Master Protein	P06239	Tyrosine-protein kinase Lck OS=Homo sapiens GN=LCK PE=1 SV=6	0	19.012	13	5	7	4	1	509	58	5.36	13.79	5
FALSE	High	Master Protein	P27816	Microtubule-associated protein 4 OS=Homo sapiens GN=MAP4 PE=1 SV=3	0	19	13	7	7	7	1	1152	120.9	5.43	4.07	7
FALSE	High	Master Protein	Q7Z2W4	Zinc finger CCCH-type antiviral protein 1 OS=Homo sapiens GN=ZC3HAV1 PE=1 SV=3	0	18.991	11	7	7	7	1	902	101.4	8.4	5.8	7
FALSE	High	Master Protein	Q63HN8	E3 ubiquitin-protein ligase RNF213 OS=Homo sapiens GN=RNF213 PE=1 SV=3	0	18.945	2	7	7	7	1	5207	591	6.48	0	7
FALSE	High	Master Protein	Q16881	Thioredoxin reductase 1, cytoplasmic OS=Homo sapiens GN=TXNRD1 PE=1 SV=3	0	18.927	15	6	6	6	1	649	70.9	7.39	0	6
FALSE	High	Master Protein	O60506	Heterogeneous nuclear ribonucleoprotein Q OS=Homo sapiens GN=SYNCRIP PE=1 SV=2	0	18.913	17	7	10	4	1	623	69.6	8.59	5.29	7
FALSE	High	Master Protein	P28066	Proteasome subunit alpha type-5 OS=Homo sapiens GN=PSMA5 PE=1 SV=3	0	18.86	29	5	10	5	1	241	26.4	4.79	8.63	5
FALSE	High	Master Protein	P09429	High mobility group protein B1 OS=Homo sapiens GN=HMGB1 PE=1 SV=3	0	18.857	35	5	11	4	1	215	24.9	5.74	4.73	5
FALSE	High	Master Protein	P33316	Deoxyuridine 5'-triphosphate nucleotidohydrolase, mitochondrial OS=Homo sapiens GN=DUT PE=1 SV=4	0	18.844	20	4	7	4	1	252	26.5	9.36	12.52	4
FALSE	High	Master Protein	P83731	60S ribosomal protein L24 OS=Homo sapiens GN=RPL24 PE=1 SV=1	0	18.705	26	5	12	5	1	157	17.8	11.25	12.48	5
FALSE	High	Master Protein	P55265	Double-stranded RNA-specific adenosine deaminase OS=Homo sapiens GN=ADAR PE=1 SV=4	0	18.697	8	6	7	6	1	1226	136	8.65	0	6
FALSE	High	Master Protein	Q9NZI8	Insulin-like growth factor 2 mRNA-binding protein 1 OS=Homo sapiens GN=IGF2BP1 PE=1 SV=2	0	18.637	11	4	8	3	1	577	63.4	9.2	7.64	4
FALSE	High	Master Protein	P14314	Glucosidase 2 subunit beta OS=Homo sapiens GN=PRKCSH PE=1 SV=2	0	18.626	14	6	7	6	1	528	59.4	4.41	3.71	6
FALSE	High	Master Protein	Q9NQC3	Reticulon-4 OS=Homo sapiens GN=RTN4 PE=1 SV=2	0	18.616	8	4	8	4	1	1192	129.9	4.5	6.11	4
FALSE	High	Master Protein	P30086	Phosphatidylethanolamine-binding protein 1 OS=Homo sapiens GN=PEBP1 PE=1 SV=3	0	18.575	45	4	6	4	1	187	21	7.53	9.34	4
FALSE	High	Master Protein	P17252	Protein kinase C alpha type OS=Homo sapiens GN=PRKCA PE=1 SV=4	0	18.431	11	6	8	6	1	672	76.7	7.05	2	6
FALSE	High	Master Protein	Q13200	26S proteasome non-ATPase regulatory subunit 2 OS=Homo sapiens GN=PSMD2 PE=1 SV=3	0	18.393	8	5	6	5	1	908	100.1	5.2	1.67	5
FALSE	High	Master Protein	P18124	60S ribosomal protein L7 OS=Homo sapiens GN=RPL7 PE=1 SV=1	0	18.366	25	7	11	7	1	248	29.2	10.65	10.09	7
FALSE	High	Master Protein	Q14204	Cytoplasmic dynein 1 heavy chain 1 OS=Homo sapiens GN=DYNC1H1 PE=1 SV=5	0	18.313	2	8	8	8	1	4646	532.1	6.4	4.08	8
FALSE	High	Master Protein	Q9UHX1	Poly(U)-binding-splicing factor PUF60 OS=Homo sapiens GN=PUF60 PE=1 SV=1	0	18.307	13	4	6	4	1	559	59.8	5.29	4.12	4
FALSE	High	Master Protein	P62826	GTP-binding nuclear protein Ran OS=Homo sapiens GN=RAN PE=1 SV=3	0	18.178	24	5	11	5	1	216	24.4	7.49	14.81	5
FALSE	High	Master Protein	Q9HB71	Calcyclin-binding protein OS=Homo sapiens GN=CACYBP PE=1 SV=2	0	18.155	23	4	8	4	1	228	26.2	8.25	6.26	4
FALSE	High	Master Protein	Q1KMD3	Heterogeneous nuclear ribonucleoprotein U-like protein 2 OS=Homo sapiens GN=HNRNPUL2 PE=1 SV=1	0	18.151	9	4	4	4	1	747	85.1	4.91	10.03	4
FALSE	High	Master Protein	O14828	Secretory carrier-associated membrane protein 3 OS=Homo sapiens GN=SCAMP3 PE=1 SV=3	0	18.099	10	3	5	3	1	347	38.3	7.64	4.42	3
FALSE	High	Master Protein	Q96RU3	Formin-binding protein 1 OS=Homo sapiens GN=FNBP1 PE=1 SV=2	0	18.099	11	5	6	5	1	617	71.3	5.72	5.69	5
FALSE	High	Master Protein	P67775	Serine/threonine-protein phosphatase 2A catalytic subunit alpha isoform OS=Homo sapiens GN=PPP2CA PE=1 SV=1	0	18.091	25	5	6	5	1	309	35.6	5.54	4.29	5
FALSE	High	Master Protein	Q16576	Histone-binding protein RBBP7 OS=Homo sapiens GN=RBBP7 PE=1 SV=1	0	18.079	17	6	8	2	1	425	47.8	5.05	2.02	6
FALSE	High	Master Protein	P41250	Glycine--tRNA ligase OS=Homo sapiens GN=GARS PE=1 SV=3	0	18.076	11	5	7	5	1	739	83.1	7.03	5.5	5
FALSE	High	Master Protein	P62917	60S ribosomal protein L8 OS=Homo sapiens GN=RPL8 PE=1 SV=2	0	18.07	18	3	6	3	1	257	28	11.03	8.23	3
FALSE	High	Master Protein	Q9BUJ2	Heterogeneous nuclear ribonucleoprotein U-like protein 1 OS=Homo sapiens GN=HNRNPUL1 PE=1 SV=2	0	18.07	8	4	6	4	1	856	95.7	6.92	5.87	4
FALSE	High	Master Protein	Q9UKX7	Nuclear pore complex protein Nup50 OS=Homo sapiens GN=NUP50 PE=1 SV=2	0	18.014	21	6	7	6	1	468	50.1	7.06	3.83	6
FALSE	High	Master Protein	P60866	40S ribosomal protein S20 OS=Homo sapiens GN=RPS20 PE=1 SV=1	0	17.997	23	3	9	3	1	119	13.4	9.94	7.84	3
FALSE	High	Master Protein	P43034	Platelet-activating factor acetylhydrolase IB subunit alpha OS=Homo sapiens GN=PAFAH1B1 PE=1 SV=2	0	17.943	14	4	6	4	1	410	46.6	7.37	4.35	4
FALSE	High	Master Protein	Q08J23	tRNA (cytosine(34)-C(5))-methyltransferase OS=Homo sapiens GN=NSUN2 PE=1 SV=2	0	17.896	9	5	6	5	1	767	86.4	6.77	5.53	5
FALSE	High	Master Protein	O14950	Myosin regulatory light chain 12B OS=Homo sapiens GN=MYL12B PE=1 SV=2	0	17.849	30	4	8	4	1	172	19.8	4.84	8.3	4
FALSE	High	Master Protein	P11310	Medium-chain specific acyl-CoA dehydrogenase, mitochondrial OS=Homo sapiens GN=ACADM PE=1 SV=1	0	17.814	19	4	4	4	1	421	46.6	8.37	8.26	4
FALSE	High	Master Protein	Q9Y2W1	Thyroid hormone receptor-associated protein 3 OS=Homo sapiens GN=THRAP3 PE=1 SV=2	0	17.799	8	6	9	6	1	955	108.6	10.15	4.64	6
FALSE	High	Master Protein	P33176	Kinesin-1 heavy chain OS=Homo sapiens GN=KIF5B PE=1 SV=1	0	17.794	8	5	5	5	1	963	109.6	6.51	8.6	5
FALSE	High	Master Protein	O00571	ATP-dependent RNA helicase DDX3X OS=Homo sapiens GN=DDX3X PE=1 SV=3	0	17.792	10	6	9	5	1	662	73.2	7.18	7.72	6
FALSE	High	Master Protein	Q5JPE7	Nodal modulator 2 OS=Homo sapiens GN=NOMO2 PE=1 SV=1	0	17.67	6	5	5	5	1	1267	139.4	5.76	2.01	5
FALSE	High	Master Protein	P61586	Transforming protein RhoA OS=Homo sapiens GN=RHOA PE=1 SV=1	0	17.658	45	5	6	2	1	193	21.8	6.1	5.71	5
FALSE	High	Master Protein	O95202	LETM1 and EF-hand domain-containing protein 1, mitochondrial OS=Homo sapiens GN=LETM1 PE=1 SV=1	0	17.63	8	5	7	5	1	739	83.3	6.7	4.33	5
FALSE	High	Master Protein	P00492	Hypoxanthine-guanine phosphoribosyltransferase OS=Homo sapiens GN=HPRT1 PE=1 SV=2	0	17.563	30	4	6	4	1	218	24.6	6.68	4.12	4
FALSE	High	Master Protein	O95757	Heat shock 70 kDa protein 4L OS=Homo sapiens GN=HSPA4L PE=1 SV=3	0	17.55	8	5	5	3	1	839	94.5	5.88	5.6	5
FALSE	High	Master Protein	P51991	Heterogeneous nuclear ribonucleoprotein A3 OS=Homo sapiens GN=HNRNPA3 PE=1 SV=2	0	17.438	13	4	15	3	1	378	39.6	9.01	17.36	4
FALSE	High	Master Protein	Q6PKG0	La-related protein 1 OS=Homo sapiens GN=LARP1 PE=1 SV=2	0	17.4	10	6	8	6	1	1096	123.4	8.82	3.9	6
FALSE	High	Master Protein	Q02790	Peptidyl-prolyl cis-trans isomerase FKBP4 OS=Homo sapiens GN=FKBP4 PE=1 SV=3	0	17.395	14	5	7	5	1	459	51.8	5.43	1.74	5
FALSE	High	Master Protein	Q01130	Serine/arginine-rich splicing factor 2 OS=Homo sapiens GN=SRSF2 PE=1 SV=4	0	17.34	12	3	7	3	1	221	25.5	11.85	15.49	3
FALSE	High	Master Protein	P04908	Histone H2A type 1-B/E OS=Homo sapiens GN=HIST1H2AB PE=1 SV=2	0	17.316	35	4	17	1	1	130	14.1	11.05	24.63	4
FALSE	High	Master Protein	P49006	MARCKS-related protein OS=Homo sapiens GN=MARCKSL1 PE=1 SV=2	0	17.199	54	3	5	3	1	195	19.5	4.67	7.78	3
FALSE	High	Master Protein	Q9BY77	Polymerase delta-interacting protein 3 OS=Homo sapiens GN=POLDIP3 PE=1 SV=2	0	17.195	22	5	5	5	1	421	46.1	9.99	6.34	5
FALSE	High	Master Protein	P11413	Glucose-6-phosphate 1-dehydrogenase OS=Homo sapiens GN=G6PD PE=1 SV=4	0	17.092	12	5	6	5	1	515	59.2	6.84	5.76	5
FALSE	High	Master Protein	Q9UKV3	Apoptotic chromatin condensation inducer in the nucleus OS=Homo sapiens GN=ACIN1 PE=1 SV=2	0	17.052	9	6	6	6	1	1341	151.8	6.43	2.73	6
FALSE	High	Master Protein	Q13151	Heterogeneous nuclear ribonucleoprotein A0 OS=Homo sapiens GN=HNRNPA0 PE=1 SV=1	0	17.007	25	4	6	3	1	305	30.8	9.29	8.59	4
FALSE	High	Master Protein	P0DME0	Protein SETSIP OS=Homo sapiens GN=SETSIP PE=1 SV=1	0	17.001	14	5	11	5	1	302	34.9	4.31	13.45	5
FALSE	High	Master Protein	P62820	Ras-related protein Rab-1A OS=Homo sapiens GN=RAB1A PE=1 SV=3	0	16.942	28	4	5	3	1	205	22.7	6.21	6.55	4
FALSE	High	Master Protein	P26639	Threonine--tRNA ligase, cytoplasmic OS=Homo sapiens GN=TARS PE=1 SV=3	0	16.9	12	6	7	6	1	723	83.4	6.67	6.36	6
FALSE	High	Master Protein	P00491	Purine nucleoside phosphorylase OS=Homo sapiens GN=PNP PE=1 SV=2	0	16.848	17	3	8	3	1	289	32.1	6.95	13.14	3
FALSE	High	Master Protein	P39656	Dolichyl-diphosphooligosaccharide--protein glycosyltransferase 48 kDa subunit OS=Homo sapiens GN=DDOST PE=1 SV=4	0	16.799	10	4	6	4	1	456	50.8	6.55	8.84	4
FALSE	High	Master Protein	O43143	Pre-mRNA-splicing factor ATP-dependent RNA helicase DHX15 OS=Homo sapiens GN=DHX15 PE=1 SV=2	0	16.714	7	5	8	5	1	795	90.9	7.46	10.08	5
FALSE	High	Master Protein	P48735	Isocitrate dehydrogenase [NADP], mitochondrial OS=Homo sapiens GN=IDH2 PE=1 SV=2	0	16.699	14	5	7	5	1	452	50.9	8.69	6.84	5
FALSE	High	Master Protein	P32119	Peroxiredoxin-2 OS=Homo sapiens GN=PRDX2 PE=1 SV=5	0	16.59	27	5	8	4	1	198	21.9	5.97	9.14	5
FALSE	High	Master Protein	P27635	60S ribosomal protein L10 OS=Homo sapiens GN=RPL10 PE=1 SV=4	0	16.579	19	3	9	3	1	214	24.6	10.08	5.56	3
FALSE	High	Master Protein	Q86YP4	Transcriptional repressor p66-alpha OS=Homo sapiens GN=GATAD2A PE=1 SV=1	0	16.534	13	5	5	5	1	633	68	9.94	2.22	5
FALSE	High	Master Protein	P19174	1-phosphatidylinositol 4,5-bisphosphate phosphodiesterase gamma-1 OS=Homo sapiens GN=PLCG1 PE=1 SV=1	0	16.51	7	5	5	5	1	1290	148.4	6.05	3.46	5
FALSE	High	Master Protein	P16401	Histone H1.5 OS=Homo sapiens GN=HIST1H1B PE=1 SV=3	0	16.498	10	3	12	3	1	226	22.6	10.92	23.59	3
FALSE	High	Master Protein	Q13423	NAD(P) transhydrogenase, mitochondrial OS=Homo sapiens GN=NNT PE=1 SV=3	0	16.472	8	6	6	6	1	1086	113.8	8.09	5.78	6
FALSE	High	Master Protein	O95347	Structural maintenance of chromosomes protein 2 OS=Homo sapiens GN=SMC2 PE=1 SV=2	0	16.447	6	6	6	6	1	1197	135.6	8.43	6.28	6
FALSE	High	Master Protein	O96019	Actin-like protein 6A OS=Homo sapiens GN=ACTL6A PE=1 SV=1	0	16.406	13	4	7	4	1	429	47.4	5.6	6.34	4
FALSE	High	Master Protein	P37802	Transgelin-2 OS=Homo sapiens GN=TAGLN2 PE=1 SV=3	0	16.399	20	3	10	3	1	199	22.4	8.25	0	3
FALSE	High	Master Protein	P31942	Heterogeneous nuclear ribonucleoprotein H3 OS=Homo sapiens GN=HNRNPH3 PE=1 SV=2	0	16.334	21	4	7	4	1	346	36.9	6.87	7.09	4
FALSE	High	Master Protein	Q9Y383	Putative RNA-binding protein Luc7-like 2 OS=Homo sapiens GN=LUC7L2 PE=1 SV=2	0	16.305	16	4	5	4	1	392	46.5	10.01	4.91	4
FALSE	High	Master Protein	P51858	Hepatoma-derived growth factor OS=Homo sapiens GN=HDGF PE=1 SV=1	0	16.275	22	3	6	3	1	240	26.8	4.73	5.89	3
FALSE	High	Master Protein	P84243	Histone H3.3 OS=Homo sapiens GN=H3F3A PE=1 SV=2	0	16.233	43	4	13	1	1	136	15.3	11.27	8.81	4
FALSE	High	Master Protein	Q03252	Lamin-B2 OS=Homo sapiens GN=LMNB2 PE=1 SV=4	0	16.233	10	6	6	4	1	620	69.9	5.59	1.96	6
FALSE	High	Master Protein	P04899	Guanine nucleotide-binding protein G(i) subunit alpha-2 OS=Homo sapiens GN=GNAI2 PE=1 SV=3	0	16.15	13	4	6	3	1	355	40.4	5.54	10.53	4
FALSE	High	Master Protein	P40939	Trifunctional enzyme subunit alpha, mitochondrial OS=Homo sapiens GN=HADHA PE=1 SV=2	0	16.133	9	5	6	5	1	763	82.9	9.04	3.94	5
FALSE	High	Master Protein	P50502	Hsc70-interacting protein OS=Homo sapiens GN=ST13 PE=1 SV=2	0	16.11	15	5	6	5	1	369	41.3	5.27	4.71	5
FALSE	High	Master Protein	Q13526	Peptidyl-prolyl cis-trans isomerase NIMA-interacting 1 OS=Homo sapiens GN=PIN1 PE=1 SV=1	0	16.088	32	4	5	4	1	163	18.2	8.82	4.52	4
FALSE	High	Master Protein	P56537	Eukaryotic translation initiation factor 6 OS=Homo sapiens GN=EIF6 PE=1 SV=1	0	16.017	30	4	5	4	1	245	26.6	4.68	11.04	4
FALSE	High	Master Protein	P82979	SAP domain-containing ribonucleoprotein OS=Homo sapiens GN=SARNP PE=1 SV=3	0	15.997	23	4	4	4	1	210	23.7	6.42	5.84	4
FALSE	High	Master Protein	P55036	26S proteasome non-ATPase regulatory subunit 4 OS=Homo sapiens GN=PSMD4 PE=1 SV=1	0	15.882	20	6	6	6	1	377	40.7	4.79	4.29	6
FALSE	High	Master Protein	P11766	Alcohol dehydrogenase class-3 OS=Homo sapiens GN=ADH5 PE=1 SV=4	0	15.803	11	3	6	3	1	374	39.7	7.49	8.92	3
FALSE	High	Master Protein	P46013	Proliferation marker protein Ki-67 OS=Homo sapiens GN=MKI67 PE=1 SV=2	0	15.762	3	6	6	6	1	3256	358.5	9.45	3.7	6
FALSE	High	Master Protein	Q13283	Ras GTPase-activating protein-binding protein 1 OS=Homo sapiens GN=G3BP1 PE=1 SV=1	0	15.73	16	4	7	4	1	466	52.1	5.52	0	4
FALSE	High	Master Protein	O15067	Phosphoribosylformylglycinamidine synthase OS=Homo sapiens GN=PFAS PE=1 SV=4	0	15.687	6	4	4	4	1	1338	144.6	5.76	4.34	4
FALSE	High	Master Protein	Q969P0	Immunoglobulin superfamily member 8 OS=Homo sapiens GN=IGSF8 PE=1 SV=1	0	15.68	13	5	5	5	1	613	65	8	7.11	5
FALSE	High	Master Protein	Q12931	Heat shock protein 75 kDa, mitochondrial OS=Homo sapiens GN=TRAP1 PE=1 SV=3	0	15.645	7	3	8	2	1	704	80.1	8.21	11.82	3
FALSE	High	Master Protein	P54578	Ubiquitin carboxyl-terminal hydrolase 14 OS=Homo sapiens GN=USP14 PE=1 SV=3	0	15.643	16	5	7	5	1	494	56	5.3	6.86	5
FALSE	High	Master Protein	E9PAV3	Nascent polypeptide-associated complex subunit alpha, muscle-specific form OS=Homo sapiens GN=NACA PE=1 SV=1	0	15.64	2	3	6	3	1	2078	205.3	9.58	13.83	3
FALSE	High	Master Protein	Q14498	RNA-binding protein 39 OS=Homo sapiens GN=RBM39 PE=1 SV=2	0	15.622	10	4	5	4	1	530	59.3	10.1	10.37	4
FALSE	High	Master Protein	P49588	Alanine--tRNA ligase, cytoplasmic OS=Homo sapiens GN=AARS PE=1 SV=2	0	15.534	7	5	7	5	1	968	106.7	5.53	5.58	5
FALSE	High	Master Protein	P61604	10 kDa heat shock protein, mitochondrial OS=Homo sapiens GN=HSPE1 PE=1 SV=2	0	15.529	39	4	9	4	1	102	10.9	8.92	10.95	4
FALSE	High	Master Protein	P30153	Serine/threonine-protein phosphatase 2A 65 kDa regulatory subunit A alpha isoform OS=Homo sapiens GN=PPP2R1A PE=1 SV=4	0	15.455	11	5	6	3	1	589	65.3	5.11	2.16	5
FALSE	High	Master Protein	P61163	Alpha-centractin OS=Homo sapiens GN=ACTR1A PE=1 SV=1	0	15.453	19	5	6	5	1	376	42.6	6.64	0	5
FALSE	High	Master Protein	O00425	Insulin-like growth factor 2 mRNA-binding protein 3 OS=Homo sapiens GN=IGF2BP3 PE=1 SV=2	0	15.449	11	4	6	3	1	579	63.7	8.87	4.15	4
FALSE	High	Master Protein	Q15019	Septin-2 OS=Homo sapiens GN=SEPT2 PE=1 SV=1	0	15.423	16	3	5	3	1	361	41.5	6.6	4.48	3
FALSE	High	Master Protein	P0C0S5	Histone H2A.Z OS=Homo sapiens GN=H2AFZ PE=1 SV=2	0	15.401	54	5	14	3	1	128	13.5	10.58	11.13	5
FALSE	High	Master Protein	P06744	Glucose-6-phosphate isomerase OS=Homo sapiens GN=GPI PE=1 SV=4	0	15.361	16	6	6	6	1	558	63.1	8.32	3.98	6
FALSE	High	Master Protein	Q9UQ80	Proliferation-associated protein 2G4 OS=Homo sapiens GN=PA2G4 PE=1 SV=3	0	15.283	8	3	5	3	1	394	43.8	6.55	3.83	3
FALSE	High	Master Protein	Q95604	HLA class I histocompatibility antigen, Cw-17 alpha chain OS=Homo sapiens GN=HLA-C PE=1 SV=1	0	15.259	14	3	4	1	1	372	41.2	6.8	11.21	3
FALSE	High	Master Protein	Q13347	Eukaryotic translation initiation factor 3 subunit I OS=Homo sapiens GN=EIF3I PE=1 SV=1	0	15.214	25	4	4	4	1	325	36.5	5.64	5.45	4
FALSE	High	Master Protein	Q99714	3-hydroxyacyl-CoA dehydrogenase type-2 OS=Homo sapiens GN=HSD17B10 PE=1 SV=3	0	15.186	25	3	5	3	1	261	26.9	7.78	7.85	3
FALSE	High	Master Protein	P43487	Ran-specific GTPase-activating protein OS=Homo sapiens GN=RANBP1 PE=1 SV=1	0	15.182	29	4	8	4	1	201	23.3	5.29	8.48	4
FALSE	High	Master Protein	P31040	Succinate dehydrogenase [ubiquinone] flavoprotein subunit, mitochondrial OS=Homo sapiens GN=SDHA PE=1 SV=2	0	15.097	14	5	6	5	1	664	72.6	7.39	3.46	5
FALSE	High	Master Protein	P62829	60S ribosomal protein L23 OS=Homo sapiens GN=RPL23 PE=1 SV=1	0	15.08	26	3	9	3	1	140	14.9	10.51	13.69	3
FALSE	High	Master Protein	P00390	Glutathione reductase, mitochondrial OS=Homo sapiens GN=GSR PE=1 SV=2	0	15.027	15	4	5	4	1	522	56.2	8.5	6.6	4
FALSE	High	Master Protein	Q9UHD1	Cysteine and histidine-rich domain-containing protein 1 OS=Homo sapiens GN=CHORDC1 PE=1 SV=2	0	15.002	22	5	5	5	1	332	37.5	7.87	0	5
FALSE	High	Master Protein	P46782	40S ribosomal protein S5 OS=Homo sapiens GN=RPS5 PE=1 SV=4	0	14.999	24	3	6	3	1	204	22.9	9.72	6.01	3
FALSE	High	Master Protein	Q8N1G4	Leucine-rich repeat-containing protein 47 OS=Homo sapiens GN=LRRC47 PE=1 SV=1	0	14.969	11	4	5	4	1	583	63.4	8.28	3.46	4
FALSE	High	Master Protein	P53992	Protein transport protein Sec24C OS=Homo sapiens GN=SEC24C PE=1 SV=3	0	14.902	7	5	5	5	1	1094	118.2	7.06	3.31	5
FALSE	High	Master Protein	P78559	Microtubule-associated protein 1A OS=Homo sapiens GN=MAP1A PE=1 SV=6	0	14.849	3	5	5	5	1	2803	305.3	4.92	2.51	5
FALSE	High	Master Protein	Q6UN15	Pre-mRNA 3'-end-processing factor FIP1 OS=Homo sapiens GN=FIP1L1 PE=1 SV=1	0	14.84	10	4	4	4	1	594	66.5	5.59	4.11	4
FALSE	High	Master Protein	Q5T4S7	E3 ubiquitin-protein ligase UBR4 OS=Homo sapiens GN=UBR4 PE=1 SV=1	0	14.826	2	4	4	4	1	5183	573.5	6.04	0	4
FALSE	High	Master Protein	Q13148	TAR DNA-binding protein 43 OS=Homo sapiens GN=TARDBP PE=1 SV=1	0	14.809	16	3	6	3	1	414	44.7	6.19	4.25	3
FALSE	High	Master Protein	Q16630	Cleavage and polyadenylation specificity factor subunit 6 OS=Homo sapiens GN=CPSF6 PE=1 SV=2	0	14.782	13	5	5	5	1	551	59.2	7.15	4.88	5
FALSE	High	Master Protein	P40925	Malate dehydrogenase, cytoplasmic OS=Homo sapiens GN=MDH1 PE=1 SV=4	0	14.716	18	4	7	4	1	334	36.4	7.36	13.52	4
FALSE	High	Master Protein	P42285	Superkiller viralicidic activity 2-like 2 OS=Homo sapiens GN=SKIV2L2 PE=1 SV=3	0	14.715	7	4	4	4	1	1042	117.7	6.52	7.18	4
FALSE	High	Master Protein	P46109	Crk-like protein OS=Homo sapiens GN=CRKL PE=1 SV=1	0	14.639	24	4	5	4	1	303	33.8	6.74	1.68	4
FALSE	High	Master Protein	P13667	Protein disulfide-isomerase A4 OS=Homo sapiens GN=PDIA4 PE=1 SV=2	0	14.519	15	5	6	5	1	645	72.9	5.07	3.95	5
FALSE	High	Master Protein	P17980	26S protease regulatory subunit 6A OS=Homo sapiens GN=PSMC3 PE=1 SV=3	0	14.478	18	5	5	5	1	439	49.2	5.24	4.15	5
FALSE	High	Master Protein	Q9Y295	Developmentally-regulated GTP-binding protein 1 OS=Homo sapiens GN=DRG1 PE=1 SV=1	0	14.428	13	4	4	4	1	367	40.5	8.9	7.1	4
FALSE	High	Master Protein	Q02543	60S ribosomal protein L18a OS=Homo sapiens GN=RPL18A PE=1 SV=2	0	14.421	19	4	6	4	1	176	20.7	10.71	14.17	4
FALSE	High	Master Protein	P36871	Phosphoglucomutase-1 OS=Homo sapiens GN=PGM1 PE=1 SV=3	0	14.393	7	4	4	4	1	562	61.4	6.76	4.11	4
FALSE	High	Master Protein	P29144	Tripeptidyl-peptidase 2 OS=Homo sapiens GN=TPP2 PE=1 SV=4	0	14.381	6	4	4	4	1	1249	138.3	6.32	0	4
FALSE	High	Master Protein	Q9Y262	Eukaryotic translation initiation factor 3 subunit L OS=Homo sapiens GN=EIF3L PE=1 SV=1	0	14.358	11	4	5	4	1	564	66.7	6.34	4.09	4
FALSE	High	Master Protein	Q9NQG5	Regulation of nuclear pre-mRNA domain-containing protein 1B OS=Homo sapiens GN=RPRD1B PE=1 SV=1	0	14.354	14	3	3	3	1	326	36.9	5.97	6.26	3
FALSE	High	Master Protein	Q9UKK9	ADP-sugar pyrophosphatase OS=Homo sapiens GN=NUDT5 PE=1 SV=1	0	14.331	18	4	7	4	1	219	24.3	4.94	4.87	4
FALSE	High	Master Protein	Q9UHD8	Septin-9 OS=Homo sapiens GN=SEPT9 PE=1 SV=2	0	14.319	20	6	7	6	1	586	65.4	8.97	2.21	6
FALSE	High	Master Protein	Q6L8Q7	2',5'-phosphodiesterase 12 OS=Homo sapiens GN=PDE12 PE=1 SV=2	0	14.319	13	5	5	5	1	609	67.3	6.57	4.01	5
FALSE	High	Master Protein	P00338	L-lactate dehydrogenase A chain OS=Homo sapiens GN=LDHA PE=1 SV=2	0	14.274	13	5	9	4	1	332	36.7	8.27	12.77	5
FALSE	High	Master Protein	P55809	Succinyl-CoA:3-ketoacid coenzyme A transferase 1, mitochondrial OS=Homo sapiens GN=OXCT1 PE=1 SV=1	0	14.233	10	4	6	4	1	520	56.1	7.46	4.49	4
FALSE	High	Master Protein	Q52LJ0	Protein FAM98B OS=Homo sapiens GN=FAM98B PE=1 SV=1	0	14.231	8	2	5	2	1	330	37.2	6.29	8.71	2
FALSE	High	Master Protein	Q14651	Plastin-1 OS=Homo sapiens GN=PLS1 PE=1 SV=2	0	14.225	4	3	7	1	1	629	70.2	5.41	10	3
FALSE	High	Master Protein	Q9P2J5	Leucine--tRNA ligase, cytoplasmic OS=Homo sapiens GN=LARS PE=1 SV=2	0	14.198	6	4	6	4	1	1176	134.4	7.3	3.24	4
FALSE	High	Master Protein	Q93084	Sarcoplasmic/endoplasmic reticulum calcium ATPase 3 OS=Homo sapiens GN=ATP2A3 PE=1 SV=2	0	14.189	6	4	5	1	1	1043	113.9	5.57	5.4	4
FALSE	High	Master Protein	P47755	F-actin-capping protein subunit alpha-2 OS=Homo sapiens GN=CAPZA2 PE=1 SV=3	0	14.17	18	3	3	2	1	286	32.9	5.85	6.79	3
FALSE	High	Master Protein	O43396	Thioredoxin-like protein 1 OS=Homo sapiens GN=TXNL1 PE=1 SV=3	0	14.164	22	4	5	4	1	289	32.2	4.96	4.76	4
FALSE	High	Master Protein	Q5VTR2	E3 ubiquitin-protein ligase BRE1A OS=Homo sapiens GN=RNF20 PE=1 SV=2	0	14.087	9	5	5	5	1	975	113.6	5.94	0	5
FALSE	High	Master Protein	P51659	Peroxisomal multifunctional enzyme type 2 OS=Homo sapiens GN=HSD17B4 PE=1 SV=3	0	14.065	9	3	4	3	1	736	79.6	8.84	7.1	3
FALSE	High	Master Protein	P35268	60S ribosomal protein L22 OS=Homo sapiens GN=RPL22 PE=1 SV=2	0	14.054	52	4	6	4	1	128	14.8	9.19	9.14	4
FALSE	High	Master Protein	Q13247	Serine/arginine-rich splicing factor 6 OS=Homo sapiens GN=SRSF6 PE=1 SV=2	0	14.025	18	5	8	4	1	344	39.6	11.43	9.01	5
FALSE	High	Master Protein	Q2TAY7	WD40 repeat-containing protein SMU1 OS=Homo sapiens GN=SMU1 PE=1 SV=2	0	13.988	11	4	4	4	1	513	57.5	7.18	6.65	4
FALSE	High	Master Protein	O00170	AH receptor-interacting protein OS=Homo sapiens GN=AIP PE=1 SV=2	0	13.981	18	4	6	4	1	330	37.6	6.29	7.58	4
FALSE	High	Master Protein	Q9UKY7	Protein CDV3 homolog OS=Homo sapiens GN=CDV3 PE=1 SV=1	0	13.972	27	3	4	3	1	258	27.3	6.4	8.61	3
FALSE	High	Master Protein	Q6P2E9	Enhancer of mRNA-decapping protein 4 OS=Homo sapiens GN=EDC4 PE=1 SV=1	0	13.962	8	5	6	5	1	1401	151.6	5.86	2.03	5
FALSE	High	Master Protein	P08758	Annexin A5 OS=Homo sapiens GN=ANXA5 PE=1 SV=2	0	13.872	17	4	4	4	1	320	35.9	5.05	5.84	4
FALSE	High	Master Protein	P27695	DNA-(apurinic or apyrimidinic site) lyase OS=Homo sapiens GN=APEX1 PE=1 SV=2	0	13.867	23	6	6	6	1	318	35.5	8.12	1.77	6
FALSE	High	Master Protein	Q13162	Peroxiredoxin-4 OS=Homo sapiens GN=PRDX4 PE=1 SV=1	0	13.865	12	4	7	2	1	271	30.5	6.29	6.76	4
FALSE	High	Master Protein	O43290	U4/U6.U5 tri-snRNP-associated protein 1 OS=Homo sapiens GN=SART1 PE=1 SV=1	0	13.824	12	6	6	6	1	800	90.2	6.13	3.57	6
FALSE	High	Master Protein	P31930	Cytochrome b-c1 complex subunit 1, mitochondrial OS=Homo sapiens GN=UQCRC1 PE=1 SV=3	0	13.775	16	4	4	4	1	480	52.6	6.37	0	4
FALSE	High	Master Protein	P62879	Guanine nucleotide-binding protein G(I)/G(S)/G(T) subunit beta-2 OS=Homo sapiens GN=GNB2 PE=1 SV=3	0	13.704	19	4	5	4	1	340	37.3	6	0	4
FALSE	High	Master Protein	P26368	Splicing factor U2AF 65 kDa subunit OS=Homo sapiens GN=U2AF2 PE=1 SV=4	0	13.691	11	3	6	3	1	475	53.5	9.09	5.94	3
FALSE	High	Master Protein	Q15717	ELAV-like protein 1 OS=Homo sapiens GN=ELAVL1 PE=1 SV=2	0	13.669	17	3	5	3	1	326	36.1	9.17	2.18	3
FALSE	High	Master Protein	P14317	Hematopoietic lineage cell-specific protein OS=Homo sapiens GN=HCLS1 PE=1 SV=3	0	13.638	15	5	6	5	1	486	54	4.81	2.69	5
FALSE	High	Master Protein	P26583	High mobility group protein B2 OS=Homo sapiens GN=HMGB2 PE=1 SV=2	0	13.637	12	2	6	1	1	209	24	7.81	4.73	2
FALSE	High	Master Protein	Q92804	TATA-binding protein-associated factor 2N OS=Homo sapiens GN=TAF15 PE=1 SV=1	0	13.608	18	4	6	2	1	592	61.8	8.02	4.78	4
FALSE	High	Master Protein	Q16891	MICOS complex subunit MIC60 OS=Homo sapiens GN=IMMT PE=1 SV=1	0	13.587	9	4	5	4	1	758	83.6	6.48	0	4
FALSE	High	Master Protein	Q9NSD9	Phenylalanine--tRNA ligase beta subunit OS=Homo sapiens GN=FARSB PE=1 SV=3	0	13.526	13	6	6	6	1	589	66.1	6.84	1.94	6
FALSE	High	Master Protein	Q02880	DNA topoisomerase 2-beta OS=Homo sapiens GN=TOP2B PE=1 SV=3	0	13.477	4	5	6	2	1	1626	183.2	8	3.51	5
FALSE	High	Master Protein	P45974	Ubiquitin carboxyl-terminal hydrolase 5 OS=Homo sapiens GN=USP5 PE=1 SV=2	0	13.458	5	3	4	3	1	858	95.7	5.03	5.24	3
FALSE	High	Master Protein	O43765	Small glutamine-rich tetratricopeptide repeat-containing protein alpha OS=Homo sapiens GN=SGTA PE=1 SV=1	0	13.424	14	4	5	4	1	313	34	4.87	6.68	4
FALSE	High	Master Protein	P38159	RNA-binding motif protein, X chromosome OS=Homo sapiens GN=RBMX PE=1 SV=3	0	13.42	11	4	5	4	1	391	42.3	10.05	8.38	4
FALSE	High	Master Protein	O60664	Perilipin-3 OS=Homo sapiens GN=PLIN3 PE=1 SV=3	0	13.413	18	5	5	5	1	434	47	5.44	2.55	5
FALSE	High	Master Protein	Q16543	Hsp90 co-chaperone Cdc37 OS=Homo sapiens GN=CDC37 PE=1 SV=1	0	13.373	11	3	7	3	1	378	44.4	5.25	5.36	3
FALSE	High	Master Protein	Q9Y2X3	Nucleolar protein 58 OS=Homo sapiens GN=NOP58 PE=1 SV=1	0	13.285	9	3	3	3	1	529	59.5	8.92	4.88	3
FALSE	High	Master Protein	P55884	Eukaryotic translation initiation factor 3 subunit B OS=Homo sapiens GN=EIF3B PE=1 SV=3	0	13.276	13	5	5	5	1	814	92.4	5	3.46	5
FALSE	High	Master Protein	P19623	Spermidine synthase OS=Homo sapiens GN=SRM PE=1 SV=1	0	13.269	15	5	6	5	1	302	33.8	5.49	1.63	5
FALSE	High	Master Protein	O43242	26S proteasome non-ATPase regulatory subunit 3 OS=Homo sapiens GN=PSMD3 PE=1 SV=2	0	13.188	7	3	4	3	1	534	60.9	8.44	7.64	3
FALSE	High	Master Protein	P38117	Electron transfer flavoprotein subunit beta OS=Homo sapiens GN=ETFB PE=1 SV=3	0	13.186	18	4	4	4	1	255	27.8	8.1	3.98	4
FALSE	High	Master Protein	P40429	60S ribosomal protein L13a OS=Homo sapiens GN=RPL13A PE=1 SV=2	0	13.129	22	5	8	5	1	203	23.6	10.93	6.42	5
FALSE	High	Master Protein	P15880	40S ribosomal protein S2 OS=Homo sapiens GN=RPS2 PE=1 SV=2	0	13.123	22	5	6	5	1	293	31.3	10.24	7.4	5
FALSE	High	Master Protein	Q16181	Septin-7 OS=Homo sapiens GN=SEPT7 PE=1 SV=2	0	13.105	13	5	6	4	1	437	50.6	8.63	3.48	5
FALSE	High	Master Protein	Q14697	Neutral alpha-glucosidase AB OS=Homo sapiens GN=GANAB PE=1 SV=3	0	13.079	8	4	6	4	1	944	106.8	6.14	2.87	4
FALSE	High	Master Protein	Q9H0A0	RNA cytidine acetyltransferase OS=Homo sapiens GN=NAT10 PE=1 SV=2	0	13.027	9	5	5	5	1	1025	115.7	8.27	1.62	5
FALSE	High	Master Protein	Q01844	RNA-binding protein EWS OS=Homo sapiens GN=EWSR1 PE=1 SV=1	0	13.02	8	3	4	3	1	656	68.4	9.33	0	3
FALSE	High	Master Protein	P02786	Transferrin receptor protein 1 OS=Homo sapiens GN=TFRC PE=1 SV=2	0	12.967	6	3	4	3	1	760	84.8	6.61	7.05	3
FALSE	High	Master Protein	P13674	Prolyl 4-hydroxylase subunit alpha-1 OS=Homo sapiens GN=P4HA1 PE=1 SV=2	0	12.945	10	4	4	4	1	534	61	6.01	4.36	4
FALSE	High	Master Protein	P62834	Ras-related protein Rap-1A OS=Homo sapiens GN=RAP1A PE=1 SV=1	0	12.937	29	4	4	1	1	184	21	6.67	6.12	4
FALSE	High	Master Protein	Q96KP4	Cytosolic non-specific dipeptidase OS=Homo sapiens GN=CNDP2 PE=1 SV=2	0	12.856	16	5	6	5	1	475	52.8	5.97	4.71	5
FALSE	High	Master Protein	P53041	Serine/threonine-protein phosphatase 5 OS=Homo sapiens GN=PPP5C PE=1 SV=1	0	12.854	9	3	3	3	1	499	56.8	6.28	4.84	3
FALSE	High	Master Protein	Q14019	Coactosin-like protein OS=Homo sapiens GN=COTL1 PE=1 SV=3	0	12.852	46	4	6	4	1	142	15.9	5.67	7.56	4
FALSE	High	Master Protein	Q14257	Reticulocalbin-2 OS=Homo sapiens GN=RCN2 PE=1 SV=1	0	12.848	15	4	4	4	1	317	36.9	4.4	2.52	4
FALSE	High	Master Protein	Q8WXF1	Paraspeckle component 1 OS=Homo sapiens GN=PSPC1 PE=1 SV=1	0	12.835	14	4	5	4	1	523	58.7	6.67	3.68	4
FALSE	High	Master Protein	P35250	Replication factor C subunit 2 OS=Homo sapiens GN=RFC2 PE=1 SV=3	0	12.8	17	4	4	4	1	354	39.1	6.44	1.68	4
FALSE	High	Master Protein	P01889	HLA class I histocompatibility antigen, B-7 alpha chain OS=Homo sapiens GN=HLA-B PE=1 SV=3	0	12.789	13	3	5	2	1	362	40.4	5.85	9.42	3
FALSE	High	Master Protein	P62847	40S ribosomal protein S24 OS=Homo sapiens GN=RPS24 PE=1 SV=1	0	12.736	20	2	8	2	1	133	15.4	10.78	13.96	2
FALSE	High	Master Protein	P14324	Farnesyl pyrophosphate synthase OS=Homo sapiens GN=FDPS PE=1 SV=4	0	12.726	10	4	4	4	1	419	48.2	6.15	1.88	4
FALSE	High	Master Protein	P63241	Eukaryotic translation initiation factor 5A-1 OS=Homo sapiens GN=EIF5A PE=1 SV=2	0	12.697	19	2	6	2	1	154	16.8	5.24	5.57	2
FALSE	High	Master Protein	P05107	Integrin beta-2 OS=Homo sapiens GN=ITGB2 PE=1 SV=2	0	12.694	10	5	5	5	1	769	84.7	6.95	1.81	5
FALSE	High	Master Protein	P51649	Succinate-semialdehyde dehydrogenase, mitochondrial OS=Homo sapiens GN=ALDH5A1 PE=1 SV=2	0	12.676	13	4	4	4	1	535	57.2	8.28	3.7	4
FALSE	High	Master Protein	Q13045	Protein flightless-1 homolog OS=Homo sapiens GN=FLII PE=1 SV=2	0	12.619	4	4	4	4	1	1269	144.7	6.05	2.15	4
FALSE	High	Master Protein	Q15052	Rho guanine nucleotide exchange factor 6 OS=Homo sapiens GN=ARHGEF6 PE=1 SV=2	0	12.617	10	4	4	3	1	776	87.4	6.05	4.92	4
FALSE	High	Master Protein	Q86VP6	Cullin-associated NEDD8-dissociated protein 1 OS=Homo sapiens GN=CAND1 PE=1 SV=2	0	12.615	4	4	5	4	1	1230	136.3	5.78	6.22	4
FALSE	High	Master Protein	P18583	Protein SON OS=Homo sapiens GN=SON PE=1 SV=4	0	12.602	3	5	5	5	1	2426	263.7	5.64	3.74	5
FALSE	High	Master Protein	Q13011	Delta(3,5)-Delta(2,4)-dienoyl-CoA isomerase, mitochondrial OS=Homo sapiens GN=ECH1 PE=1 SV=2	0	12.564	13	3	5	3	1	328	35.8	8	8.76	3
FALSE	High	Master Protein	P24666	Low molecular weight phosphotyrosine protein phosphatase OS=Homo sapiens GN=ACP1 PE=1 SV=3	0	12.53	34	3	4	3	1	158	18	6.74	2.27	3
FALSE	High	Master Protein	P49755	Transmembrane emp24 domain-containing protein 10 OS=Homo sapiens GN=TMED10 PE=1 SV=2	0	12.529	15	3	7	3	1	219	25	7.44	4.17	3
FALSE	High	Master Protein	P61019	Ras-related protein Rab-2A OS=Homo sapiens GN=RAB2A PE=1 SV=1	0	12.463	20	3	3	3	1	212	23.5	6.54	3.43	3
FALSE	High	Master Protein	Q9H444	Charged multivesicular body protein 4b OS=Homo sapiens GN=CHMP4B PE=1 SV=1	0	12.458	13	2	3	2	1	224	24.9	4.82	4.5	2
FALSE	High	Master Protein	P30520	Adenylosuccinate synthetase isozyme 2 OS=Homo sapiens GN=ADSS PE=1 SV=3	0	12.418	13	4	4	4	1	456	50.1	6.55	0	4
FALSE	High	Master Protein	Q9Y230	RuvB-like 2 OS=Homo sapiens GN=RUVBL2 PE=1 SV=3	0	12.318	11	4	5	4	1	463	51.1	5.64	8.3	4
FALSE	High	Master Protein	P78344	Eukaryotic translation initiation factor 4 gamma 2 OS=Homo sapiens GN=EIF4G2 PE=1 SV=1	0	12.226	5	3	4	3	1	907	102.3	7.14	1.95	3
FALSE	High	Master Protein	O00410	Importin-5 OS=Homo sapiens GN=IPO5 PE=1 SV=4	0	12.212	5	3	3	3	1	1097	123.6	4.94	4.49	3
FALSE	High	Master Protein	Q9NP72	Ras-related protein Rab-18 OS=Homo sapiens GN=RAB18 PE=1 SV=1	0	12.2	25	4	4	4	1	206	23	5.24	4.01	4
FALSE	High	Master Protein	Q9NQ39	Putative 40S ribosomal protein S10-like OS=Homo sapiens GN=RPS10P5 PE=5 SV=1	0	12.188	9	2	6	2	1	176	20.1	10.13	11.08	2
FALSE	High	Master Protein	P15924	Desmoplakin OS=Homo sapiens GN=DSP PE=1 SV=3	0	12.179	1	3	3	3	1	2871	331.6	6.81	4.65	3
FALSE	High	Master Protein	P62993	Growth factor receptor-bound protein 2 OS=Homo sapiens GN=GRB2 PE=1 SV=1	0	12.147	25	3	3	3	1	217	25.2	6.32	4.97	3
FALSE	High	Master Protein	Q10570	Cleavage and polyadenylation specificity factor subunit 1 OS=Homo sapiens GN=CPSF1 PE=1 SV=2	0	12.123	4	4	4	4	1	1443	160.8	6.4	1.8	4
FALSE	High	Master Protein	P53999	Activated RNA polymerase II transcriptional coactivator p15 OS=Homo sapiens GN=SUB1 PE=1 SV=3	0	12.113	24	4	8	4	1	127	14.4	9.6	8.79	4
FALSE	High	Master Protein	P43403	Tyrosine-protein kinase ZAP-70 OS=Homo sapiens GN=ZAP70 PE=1 SV=1	0	12.106	5	3	3	3	1	619	69.8	7.69	1.95	3
FALSE	High	Master Protein	O00299	Chloride intracellular channel protein 1 OS=Homo sapiens GN=CLIC1 PE=1 SV=4	0	12.042	24	3	4	3	1	241	26.9	5.17	4.85	3
FALSE	High	Master Protein	O75152	Zinc finger CCCH domain-containing protein 11A OS=Homo sapiens GN=ZC3H11A PE=1 SV=3	0	12.034	8	4	4	4	1	810	89.1	8.37	2.29	4
FALSE	High	Master Protein	P09622	Dihydrolipoyl dehydrogenase, mitochondrial OS=Homo sapiens GN=DLD PE=1 SV=2	0	12.003	9	4	4	4	1	509	54.1	7.85	3.05	4
FALSE	High	Master Protein	P46778	60S ribosomal protein L21 OS=Homo sapiens GN=RPL21 PE=1 SV=2	0	11.963	28	3	7	3	1	160	18.6	10.49	6.9	3
FALSE	High	Master Protein	O94925	Glutaminase kidney isoform, mitochondrial OS=Homo sapiens GN=GLS PE=1 SV=1	0	11.901	11	4	5	4	1	669	73.4	7.77	0	4
FALSE	High	Master Protein	P51532	Transcription activator BRG1 OS=Homo sapiens GN=SMARCA4 PE=1 SV=2	0	11.891	3	3	3	3	1	1647	184.5	7.88	1.9	3
FALSE	High	Master Protein	Q9Y5S9	RNA-binding protein 8A OS=Homo sapiens GN=RBM8A PE=1 SV=1	0	11.874	17	2	4	2	1	174	19.9	5.72	8.71	2
FALSE	High	Master Protein	P62249	40S ribosomal protein S16 OS=Homo sapiens GN=RPS16 PE=1 SV=2	0	11.861	20	3	7	3	1	146	16.4	10.21	4.31	3
FALSE	High	Master Protein	Q99873	Protein arginine N-methyltransferase 1 OS=Homo sapiens GN=PRMT1 PE=1 SV=2	0	11.858	15	4	4	4	1	361	41.5	5.43	2.47	4
FALSE	High	Master Protein	P24928	DNA-directed RNA polymerase II subunit RPB1 OS=Homo sapiens GN=POLR2A PE=1 SV=2	0	11.816	4	4	4	4	1	1970	217	7.37	0	4
FALSE	High	Master Protein	O00541	Pescadillo homolog OS=Homo sapiens GN=PES1 PE=1 SV=1	0	11.807	9	4	5	4	1	588	68	7.33	1.67	4
FALSE	High	Master Protein	P30154	Serine/threonine-protein phosphatase 2A 65 kDa regulatory subunit A beta isoform OS=Homo sapiens GN=PPP2R1B PE=1 SV=3	0	11.806	7	3	4	1	1	601	66.2	4.94	4.46	3
FALSE	High	Master Protein	Q04637	Eukaryotic translation initiation factor 4 gamma 1 OS=Homo sapiens GN=EIF4G1 PE=1 SV=4	0	11.803	4	3	4	3	1	1599	175.4	5.33	2.11	3
FALSE	High	Master Protein	Q9NQR4	Omega-amidase NIT2 OS=Homo sapiens GN=NIT2 PE=1 SV=1	0	11.775	18	3	4	3	1	276	30.6	7.21	2.07	3
FALSE	High	Master Protein	Q06203	Amidophosphoribosyltransferase OS=Homo sapiens GN=PPAT PE=1 SV=1	0	11.766	16	4	4	4	1	517	57.4	6.76	3.15	4
FALSE	High	Master Protein	Q99439	Calponin-2 OS=Homo sapiens GN=CNN2 PE=1 SV=4	0	11.764	20	3	5	3	1	309	33.7	7.33	5.24	3
FALSE	High	Master Protein	O60264	SWI/SNF-related matrix-associated actin-dependent regulator of chromatin subfamily A member 5 OS=Homo sapiens GN=SMARCA5 PE=1 SV=1	0	11.737	5	4	4	4	1	1052	121.8	8.09	2.26	4
FALSE	High	Master Protein	P62333	26S protease regulatory subunit 10B OS=Homo sapiens GN=PSMC6 PE=1 SV=1	0	11.736	18	4	4	4	1	389	44.1	7.49	2.29	4
FALSE	High	Master Protein	P23368	NAD-dependent malic enzyme, mitochondrial OS=Homo sapiens GN=ME2 PE=1 SV=1	0	11.73	6	3	3	3	1	584	65.4	7.61	4.35	3
FALSE	High	Master Protein	Q92896	Golgi apparatus protein 1 OS=Homo sapiens GN=GLG1 PE=1 SV=2	0	11.728	4	4	4	4	1	1179	134.5	6.9	3.71	4
FALSE	High	Master Protein	P50213	Isocitrate dehydrogenase [NAD] subunit alpha, mitochondrial OS=Homo sapiens GN=IDH3A PE=1 SV=1	0	11.706	11	4	4	4	1	366	39.6	6.92	2.44	4
FALSE	High	Master Protein	P54136	Arginine--tRNA ligase, cytoplasmic OS=Homo sapiens GN=RARS PE=1 SV=2	0	11.702	8	3	4	3	1	660	75.3	6.68	4.12	3
FALSE	High	Master Protein	P63000	Ras-related C3 botulinum toxin substrate 1 OS=Homo sapiens GN=RAC1 PE=1 SV=1	0	11.64	26	5	5	2	1	192	21.4	8.5	0	5
FALSE	High	Master Protein	Q8N1K5	Protein THEMIS OS=Homo sapiens GN=THEMIS PE=1 SV=3	0	11.606	7	4	4	4	1	641	73.4	5.9	2.65	4
FALSE	High	Master Protein	Q92556	Engulfment and cell motility protein 1 OS=Homo sapiens GN=ELMO1 PE=1 SV=2	0	11.592	5	3	4	3	1	727	83.8	6.28	4.27	3
FALSE	High	Master Protein	P84103	Serine/arginine-rich splicing factor 3 OS=Homo sapiens GN=SRSF3 PE=1 SV=1	0	11.587	18	3	6	2	1	164	19.3	11.65	10.6	3
FALSE	High	Master Protein	Q14331	Protein FRG1 OS=Homo sapiens GN=FRG1 PE=1 SV=1	0	11.577	14	3	4	3	1	258	29.2	9.01	3.83	3
FALSE	High	Master Protein	O15511	Actin-related protein 2/3 complex subunit 5 OS=Homo sapiens GN=ARPC5 PE=1 SV=3	0	11.57	36	3	3	3	1	151	16.3	5.67	2.65	3
FALSE	High	Master Protein	Q15084	Protein disulfide-isomerase A6 OS=Homo sapiens GN=PDIA6 PE=1 SV=1	0	11.561	7	2	4	2	1	440	48.1	5.08	7.41	2
FALSE	High	Master Protein	P37837	Transaldolase OS=Homo sapiens GN=TALDO1 PE=1 SV=2	0	11.553	13	4	6	4	1	337	37.5	6.81	10.65	4
FALSE	High	Master Protein	P62314	Small nuclear ribonucleoprotein Sm D1 OS=Homo sapiens GN=SNRPD1 PE=1 SV=1	0	11.525	26	2	5	2	1	119	13.3	11.56	2.78	2
FALSE	High	Master Protein	Q9HAV4	Exportin-5 OS=Homo sapiens GN=XPO5 PE=1 SV=1	0	11.491	4	3	3	3	1	1204	136.2	5.8	2.54	3
FALSE	High	Master Protein	O95861	3'(2'),5'-bisphosphate nucleotidase 1 OS=Homo sapiens GN=BPNT1 PE=1 SV=1	0	11.413	17	3	3	3	1	308	33.4	5.69	3.38	3
FALSE	High	Master Protein	P05141	ADP/ATP translocase 2 OS=Homo sapiens GN=SLC25A5 PE=1 SV=7	0	11.379	16	4	6	3	1	298	32.8	9.69	6.3	4
FALSE	High	Master Protein	O75390	Citrate synthase, mitochondrial OS=Homo sapiens GN=CS PE=1 SV=2	0	11.369	8	4	5	4	1	466	51.7	8.32	7.13	4
FALSE	High	Master Protein	P07741	Adenine phosphoribosyltransferase OS=Homo sapiens GN=APRT PE=1 SV=2	0	11.32	27	3	4	3	1	180	19.6	6.02	0	3
FALSE	High	Master Protein	P23258	Tubulin gamma-1 chain OS=Homo sapiens GN=TUBG1 PE=1 SV=2	0	11.298	6	3	4	3	1	451	51.1	6.14	3.92	3
FALSE	High	Master Protein	Q92608	Dedicator of cytokinesis protein 2 OS=Homo sapiens GN=DOCK2 PE=1 SV=2	0	11.288	4	4	4	4	1	1830	211.8	6.87	1.65	4
FALSE	High	Master Protein	P16989	Y-box-binding protein 3 OS=Homo sapiens GN=YBX3 PE=1 SV=4	0	11.287	10	3	4	2	1	372	40.1	9.77	7.54	3
FALSE	High	Master Protein	P62857	40S ribosomal protein S28 OS=Homo sapiens GN=RPS28 PE=1 SV=1	0	11.278	52	3	5	3	1	69	7.8	10.7	3.82	3
FALSE	High	Master Protein	Q7Z6Z7	E3 ubiquitin-protein ligase HUWE1 OS=Homo sapiens GN=HUWE1 PE=1 SV=3	0	11.259	2	4	4	4	1	4374	481.6	5.22	3.08	4
FALSE	High	Master Protein	P08134	Rho-related GTP-binding protein RhoC OS=Homo sapiens GN=RHOC PE=1 SV=1	0	11.244	32	4	4	1	1	193	22	6.58	3.75	4
FALSE	High	Master Protein	P45973	Chromobox protein homolog 5 OS=Homo sapiens GN=CBX5 PE=1 SV=1	0	11.237	29	4	6	3	1	191	22.2	5.86	2.53	4
FALSE	High	Master Protein	P99999	Cytochrome c OS=Homo sapiens GN=CYCS PE=1 SV=2	0	11.234	18	2	9	2	1	105	11.7	9.57	11	2
FALSE	High	Master Protein	P33240	Cleavage stimulation factor subunit 2 OS=Homo sapiens GN=CSTF2 PE=1 SV=1	0	11.233	11	4	4	4	1	577	60.9	6.83	1.91	4
FALSE	High	Master Protein	Q8WXX5	DnaJ homolog subfamily C member 9 OS=Homo sapiens GN=DNAJC9 PE=1 SV=1	0	11.217	17	3	4	3	1	260	29.9	5.73	4.16	3
FALSE	High	Master Protein	Q15056	Eukaryotic translation initiation factor 4H OS=Homo sapiens GN=EIF4H PE=1 SV=5	0	11.198	19	3	6	3	1	248	27.4	7.23	3.04	3
FALSE	High	Master Protein	O75439	Mitochondrial-processing peptidase subunit beta OS=Homo sapiens GN=PMPCB PE=1 SV=2	0	11.19	6	2	3	2	1	489	54.3	6.83	2.79	2
FALSE	High	Master Protein	P62318	Small nuclear ribonucleoprotein Sm D3 OS=Homo sapiens GN=SNRPD3 PE=1 SV=1	0	11.139	25	2	4	2	1	126	13.9	10.32	8.06	2
FALSE	High	Master Protein	P11387	DNA topoisomerase 1 OS=Homo sapiens GN=TOP1 PE=1 SV=2	0	11.127	5	3	7	3	1	765	90.7	9.31	3.28	3
FALSE	High	Master Protein	Q9NZL9	Methionine adenosyltransferase 2 subunit beta OS=Homo sapiens GN=MAT2B PE=1 SV=1	0	11.125	14	3	4	3	1	334	37.5	7.36	4.24	3
FALSE	High	Master Protein	Q14847	LIM and SH3 domain protein 1 OS=Homo sapiens GN=LASP1 PE=1 SV=2	0	11.104	10	2	6	2	1	261	29.7	7.05	10.76	2
FALSE	High	Master Protein	Q6UB35	Monofunctional C1-tetrahydrofolate synthase, mitochondrial OS=Homo sapiens GN=MTHFD1L PE=1 SV=1	0	11.083	5	4	4	4	1	978	105.7	8.06	0	4
FALSE	High	Master Protein	Q86UP2	Kinectin OS=Homo sapiens GN=KTN1 PE=1 SV=1	0	11.08	4	4	4	4	1	1357	156.2	5.64	0	4
FALSE	High	Master Protein	O15355	Protein phosphatase 1G OS=Homo sapiens GN=PPM1G PE=1 SV=1	0	11.08	16	4	5	4	1	546	59.2	4.36	0	4
FALSE	High	Master Protein	P24534	Elongation factor 1-beta OS=Homo sapiens GN=EEF1B2 PE=1 SV=3	0	10.925	16	3	5	3	1	225	24.7	4.67	4.83	3
FALSE	High	Master Protein	Q86YV0	RAS protein activator like-3 OS=Homo sapiens GN=RASAL3 PE=1 SV=2	0	10.911	4	3	3	3	1	1011	111.8	8.75	5.33	3
FALSE	High	Master Protein	P55786	Puromycin-sensitive aminopeptidase OS=Homo sapiens GN=NPEPPS PE=1 SV=2	0	10.829	4	3	3	3	1	919	103.2	5.72	3.66	3
FALSE	High	Master Protein	Q12904	Aminoacyl tRNA synthase complex-interacting multifunctional protein 1 OS=Homo sapiens GN=AIMP1 PE=1 SV=2	0	10.823	25	5	5	5	1	312	34.3	8.43	0	5
FALSE	High	Master Protein	Q8WWM7	Ataxin-2-like protein OS=Homo sapiens GN=ATXN2L PE=1 SV=2	0	10.818	6	4	5	4	1	1075	113.3	8.59	2.11	4
FALSE	High	Master Protein	P07384	Calpain-1 catalytic subunit OS=Homo sapiens GN=CAPN1 PE=1 SV=1	0	10.816	7	4	4	4	1	714	81.8	5.67	1.89	4
FALSE	High	Master Protein	Q00796	Sorbitol dehydrogenase OS=Homo sapiens GN=SORD PE=1 SV=4	0	10.788	17	3	3	3	1	357	38.3	7.97	4.49	3
FALSE	High	Master Protein	P54577	Tyrosine--tRNA ligase, cytoplasmic OS=Homo sapiens GN=YARS PE=1 SV=4	0	10.774	9	3	4	3	1	528	59.1	7.05	2.35	3
FALSE	High	Master Protein	P84095	Rho-related GTP-binding protein RhoG OS=Homo sapiens GN=RHOG PE=1 SV=1	0	10.762	17	2	3	2	1	191	21.3	8.12	2.22	2
FALSE	High	Master Protein	Q15149	Plectin OS=Homo sapiens GN=PLEC PE=1 SV=3	0	10.757	1	4	4	4	1	4684	531.5	5.96	1.65	4
FALSE	High	Master Protein	O00567	Nucleolar protein 56 OS=Homo sapiens GN=NOP56 PE=1 SV=4	0	10.728	9	3	4	3	1	594	66	9.19	1.79	3
FALSE	High	Master Protein	P50570	Dynamin-2 OS=Homo sapiens GN=DNM2 PE=1 SV=2	0	10.727	5	3	3	3	1	870	98	7.44	0	3
FALSE	High	Master Protein	P62140	Serine/threonine-protein phosphatase PP1-beta catalytic subunit OS=Homo sapiens GN=PPP1CB PE=1 SV=3	0	10.726	11	3	3	1	1	327	37.2	6.19	4.18	3
FALSE	High	Master Protein	P55060	Exportin-2 OS=Homo sapiens GN=CSE1L PE=1 SV=3	0	10.713	5	4	5	4	1	971	110.3	5.77	5.78	4
FALSE	High	Master Protein	P28331	NADH-ubiquinone oxidoreductase 75 kDa subunit, mitochondrial OS=Homo sapiens GN=NDUFS1 PE=1 SV=3	0	10.697	9	4	4	4	1	727	79.4	6.23	2.56	4
FALSE	High	Master Protein	Q9BPX3	Condensin complex subunit 3 OS=Homo sapiens GN=NCAPG PE=1 SV=1	0	10.66	4	3	3	3	1	1015	114.3	5.59	0	3
FALSE	High	Master Protein	O14579	Coatomer subunit epsilon OS=Homo sapiens GN=COPE PE=1 SV=3	0	10.642	12	2	4	2	1	308	34.5	5.12	2.08	2
FALSE	High	Master Protein	P06753	Tropomyosin alpha-3 chain OS=Homo sapiens GN=TPM3 PE=1 SV=2	0	10.608	15	4	5	3	1	285	32.9	4.72	6.65	4
FALSE	High	Master Protein	P20073	Annexin A7 OS=Homo sapiens GN=ANXA7 PE=1 SV=3	0	10.598	5	2	3	2	1	488	52.7	5.68	0	2
FALSE	High	Master Protein	Q9NW13	RNA-binding protein 28 OS=Homo sapiens GN=RBM28 PE=1 SV=3	0	10.572	6	3	3	3	1	759	85.7	9.22	3.64	3
FALSE	High	Master Protein	Q6JBY9	CapZ-interacting protein OS=Homo sapiens GN=RCSD1 PE=1 SV=1	0	10.532	18	3	3	3	1	416	44.5	5.4	0	3
FALSE	High	Master Protein	Q8WWY3	U4/U6 small nuclear ribonucleoprotein Prp31 OS=Homo sapiens GN=PRPF31 PE=1 SV=2	0	10.476	13	5	5	5	1	499	55.4	5.78	0	5
FALSE	High	Master Protein	Q8WVJ2	NudC domain-containing protein 2 OS=Homo sapiens GN=NUDCD2 PE=1 SV=1	0	10.401	20	3	3	3	1	157	17.7	5.07	4.44	3
FALSE	High	Master Protein	P48444	Coatomer subunit delta OS=Homo sapiens GN=ARCN1 PE=1 SV=1	0	10.389	7	3	3	3	1	511	57.2	6.21	6.55	3
FALSE	High	Master Protein	P62136	Serine/threonine-protein phosphatase PP1-alpha catalytic subunit OS=Homo sapiens GN=PPP1CA PE=1 SV=1	0	10.337	11	3	3	1	1	330	37.5	6.33	4.25	3
FALSE	High	Master Protein	Q5T749	Keratinocyte proline-rich protein OS=Homo sapiens GN=KPRP PE=1 SV=1	0	10.328	11	4	6	4	1	579	64.1	8.27	0	4
FALSE	High	Master Protein	Q8WYJ6	Septin-1 OS=Homo sapiens GN=SEPT1 PE=1 SV=2	0	10.314	17	4	4	4	1	367	41.9	5.8	0	4
FALSE	High	Master Protein	P48739	Phosphatidylinositol transfer protein beta isoform OS=Homo sapiens GN=PITPNB PE=1 SV=2	0	10.311	20	3	3	2	1	271	31.5	6.87	6.53	3
FALSE	High	Master Protein	Q9BUQ8	Probable ATP-dependent RNA helicase DDX23 OS=Homo sapiens GN=DDX23 PE=1 SV=3	0	10.288	6	5	5	5	1	820	95.5	9.55	0	5
FALSE	High	Master Protein	P21291	Cysteine and glycine-rich protein 1 OS=Homo sapiens GN=CSRP1 PE=1 SV=3	0	10.286	34	4	4	4	1	193	20.6	8.57	1.85	4
FALSE	High	Master Protein	P51114	Fragile X mental retardation syndrome-related protein 1 OS=Homo sapiens GN=FXR1 PE=1 SV=3	0	10.284	6	3	4	3	1	621	69.7	6.15	5.1	3
FALSE	High	Master Protein	P84098	60S ribosomal protein L19 OS=Homo sapiens GN=RPL19 PE=1 SV=1	0	10.269	9	1	3	1	1	196	23.5	11.47	2.12	1
FALSE	High	Master Protein	P51784	Ubiquitin carboxyl-terminal hydrolase 11 OS=Homo sapiens GN=USP11 PE=1 SV=3	0	10.218	6	4	4	4	1	963	109.7	5.45	1.63	4
FALSE	High	Master Protein	Q15907	Ras-related protein Rab-11B OS=Homo sapiens GN=RAB11B PE=1 SV=4	0	10.195	15	3	5	3	1	218	24.5	5.94	10.13	3
FALSE	High	Master Protein	Q14165	Malectin OS=Homo sapiens GN=MLEC PE=1 SV=1	0	10.182	16	3	4	3	1	292	32.2	5.41	4.59	3
FALSE	High	Master Protein	Q9Y266	Nuclear migration protein nudC OS=Homo sapiens GN=NUDC PE=1 SV=1	0	10.156	17	4	5	4	1	331	38.2	5.38	0	4
FALSE	High	Master Protein	Q9UBB4	Ataxin-10 OS=Homo sapiens GN=ATXN10 PE=1 SV=1	0	10.143	8	3	3	3	1	475	53.5	5.25	2.53	3
FALSE	High	Master Protein	O75791	GRB2-related adapter protein 2 OS=Homo sapiens GN=GRAP2 PE=1 SV=1	0	10.127	8	2	4	2	1	330	37.9	6.95	3.55	2
FALSE	High	Master Protein	Q9Y333	U6 snRNA-associated Sm-like protein LSm2 OS=Homo sapiens GN=LSM2 PE=1 SV=1	0	10.086	21	2	5	2	1	95	10.8	6.52	0	2
FALSE	High	Master Protein	O75400	Pre-mRNA-processing factor 40 homolog A OS=Homo sapiens GN=PRPF40A PE=1 SV=2	0	10.085	5	3	3	3	1	957	108.7	7.56	3.88	3
FALSE	High	Master Protein	P36873	Serine/threonine-protein phosphatase PP1-gamma catalytic subunit OS=Homo sapiens GN=PPP1CC PE=1 SV=1	0	10.043	11	3	3	1	1	323	37	6.54	2.15	3
FALSE	High	Master Protein	Q02878	60S ribosomal protein L6 OS=Homo sapiens GN=RPL6 PE=1 SV=3	0	10.011	19	4	5	4	1	288	32.7	10.58	4.92	4
FALSE	High	Master Protein	P26640	Valine--tRNA ligase OS=Homo sapiens GN=VARS PE=1 SV=4	0	10.008	4	3	3	3	1	1264	140.4	7.59	4.18	3
FALSE	High	Master Protein	P62191	26S protease regulatory subunit 4 OS=Homo sapiens GN=PSMC1 PE=1 SV=1	0	9.995	13	3	3	3	1	440	49.2	6.21	2.42	3
FALSE	High	Master Protein	Q15003	Condensin complex subunit 2 OS=Homo sapiens GN=NCAPH PE=1 SV=3	0	9.976	5	3	3	3	1	741	82.5	5.06	1.87	3
FALSE	High	Master Protein	P46459	Vesicle-fusing ATPase OS=Homo sapiens GN=NSF PE=1 SV=3	0	9.973	5	3	3	3	1	744	82.5	6.95	2.03	3
FALSE	High	Master Protein	O60341	Lysine-specific histone demethylase 1A OS=Homo sapiens GN=KDM1A PE=1 SV=2	0	9.948	5	3	3	3	1	852	92.8	6.52	0	3
FALSE	High	Master Protein	P35251	Replication factor C subunit 1 OS=Homo sapiens GN=RFC1 PE=1 SV=4	0	9.927	3	3	3	3	1	1148	128.2	9.36	2.63	3
FALSE	High	Master Protein	P17096	High mobility group protein HMG-I/HMG-Y OS=Homo sapiens GN=HMGA1 PE=1 SV=3	0	9.92	23	1	5	1	1	107	11.7	10.32	8.29	1
FALSE	High	Master Protein	P23284	Peptidyl-prolyl cis-trans isomerase B OS=Homo sapiens GN=PPIB PE=1 SV=2	0	9.897	18	3	3	3	1	216	23.7	9.41	2.47	3
FALSE	High	Master Protein	Q9UKM9	RNA-binding protein Raly OS=Homo sapiens GN=RALY PE=1 SV=1	0	9.876	17	4	5	4	1	306	32.4	9.17	2.28	4
FALSE	High	Master Protein	Q09161	Nuclear cap-binding protein subunit 1 OS=Homo sapiens GN=NCBP1 PE=1 SV=1	0	9.871	6	3	3	3	1	790	91.8	6.43	1.9	3
FALSE	High	Master Protein	Q12788	Transducin beta-like protein 3 OS=Homo sapiens GN=TBL3 PE=1 SV=2	0	9.861	7	3	3	3	1	808	89	6.9	1.68	3
FALSE	High	Master Protein	O15117	FYN-binding protein OS=Homo sapiens GN=FYB PE=1 SV=2	0	9.857	7	4	4	4	1	783	85.3	6.48	2.16	4
FALSE	High	Master Protein	P15153	Ras-related C3 botulinum toxin substrate 2 OS=Homo sapiens GN=RAC2 PE=1 SV=1	0	9.852	23	4	4	1	1	192	21.4	7.61	0	4
FALSE	High	Master Protein	Q10471	Polypeptide N-acetylgalactosaminyltransferase 2 OS=Homo sapiens GN=GALNT2 PE=1 SV=1	0	9.838	9	3	3	3	1	571	64.7	8.35	3.49	3
FALSE	High	Master Protein	Q9NTJ3	Structural maintenance of chromosomes protein 4 OS=Homo sapiens GN=SMC4 PE=1 SV=2	0	9.833	3	3	3	3	1	1288	147.1	6.79	1.78	3
FALSE	High	Master Protein	P13804	Electron transfer flavoprotein subunit alpha, mitochondrial OS=Homo sapiens GN=ETFA PE=1 SV=1	0	9.831	14	3	4	3	1	333	35.1	8.38	4.82	3
FALSE	High	Master Protein	P49792	E3 SUMO-protein ligase RanBP2 OS=Homo sapiens GN=RANBP2 PE=1 SV=2	0	9.824	1	3	3	3	1	3224	358	6.2	3.72	3
FALSE	High	Master Protein	P30041	Peroxiredoxin-6 OS=Homo sapiens GN=PRDX6 PE=1 SV=3	0	9.803	20	3	5	3	1	224	25	6.38	1.84	3
FALSE	High	Master Protein	B5ME19	Eukaryotic translation initiation factor 3 subunit C-like protein OS=Homo sapiens GN=EIF3CL PE=3 SV=1	0	9.787	5	4	4	4	1	914	105.4	5.64	0	4
FALSE	High	Master Protein	P13861	cAMP-dependent protein kinase type II-alpha regulatory subunit OS=Homo sapiens GN=PRKAR2A PE=1 SV=2	0	9.743	10	3	3	3	1	404	45.5	5.07	4.2	3
FALSE	High	Master Protein	Q15437	Protein transport protein Sec23B OS=Homo sapiens GN=SEC23B PE=1 SV=2	0	9.713	6	3	3	3	1	767	86.4	6.89	4.88	3
FALSE	High	Master Protein	Q9UK76	Hematological and neurological expressed 1 protein OS=Homo sapiens GN=HN1 PE=1 SV=3	0	9.712	28	2	4	2	1	154	16	5.6	0	2
FALSE	High	Master Protein	P47897	Glutamine--tRNA ligase OS=Homo sapiens GN=QARS PE=1 SV=1	0	9.696	4	2	2	2	1	775	87.7	7.15	5.04	2
FALSE	High	Master Protein	P25789	Proteasome subunit alpha type-4 OS=Homo sapiens GN=PSMA4 PE=1 SV=1	0	9.677	16	3	4	3	1	261	29.5	7.72	4.99	3
FALSE	High	Master Protein	Q96I24	Far upstream element-binding protein 3 OS=Homo sapiens GN=FUBP3 PE=1 SV=2	0	9.675	10	4	4	3	1	572	61.6	8.38	0	4
FALSE	High	Master Protein	Q9BRA2	Thioredoxin domain-containing protein 17 OS=Homo sapiens GN=TXNDC17 PE=1 SV=1	0	9.662	30	3	3	3	1	123	13.9	5.52	4.53	3
FALSE	High	Master Protein	Q9H3K6	BolA-like protein 2 OS=Homo sapiens GN=BOLA2 PE=1 SV=1	0	9.659	29	2	5	2	1	86	10.1	6.52	9.59	2
FALSE	High	Master Protein	Q01196	Runt-related transcription factor 1 OS=Homo sapiens GN=RUNX1 PE=1 SV=3	0	9.652	11	3	3	3	1	453	48.7	9.35	0	3
FALSE	High	Master Protein	P35611	Alpha-adducin OS=Homo sapiens GN=ADD1 PE=1 SV=2	0	9.61	6	3	3	3	1	737	80.9	5.83	1.91	3
FALSE	High	Master Protein	P61081	NEDD8-conjugating enzyme Ubc12 OS=Homo sapiens GN=UBE2M PE=1 SV=1	0	9.58	20	3	3	3	1	183	20.9	7.69	3.53	3
FALSE	High	Master Protein	P62913	60S ribosomal protein L11 OS=Homo sapiens GN=RPL11 PE=1 SV=2	0	9.576	13	2	4	2	1	178	20.2	9.6	5.57	2
FALSE	High	Master Protein	P53618	Coatomer subunit beta OS=Homo sapiens GN=COPB1 PE=1 SV=3	0	9.554	7	4	4	4	1	953	107.1	6.05	2.77	4
FALSE	High	Master Protein	P60228	Eukaryotic translation initiation factor 3 subunit E OS=Homo sapiens GN=EIF3E PE=1 SV=1	0	9.522	11	3	3	3	1	445	52.2	6.04	2.69	3
FALSE	High	Master Protein	P61289	Proteasome activator complex subunit 3 OS=Homo sapiens GN=PSME3 PE=1 SV=1	0	9.509	6	1	3	1	1	254	29.5	5.95	2.57	1
FALSE	High	Master Protein	O15042	U2 snRNP-associated SURP motif-containing protein OS=Homo sapiens GN=U2SURP PE=1 SV=2	0	9.497	6	4	4	4	1	1029	118.2	8.47	3.63	4
FALSE	High	Master Protein	P50914	60S ribosomal protein L14 OS=Homo sapiens GN=RPL14 PE=1 SV=4	0	9.481	16	3	5	3	1	215	23.4	10.93	4.78	3
FALSE	High	Master Protein	P62081	40S ribosomal protein S7 OS=Homo sapiens GN=RPS7 PE=1 SV=1	0	9.412	25	3	8	3	1	194	22.1	10.1	6.13	3
FALSE	High	Master Protein	Q96F15	GTPase IMAP family member 5 OS=Homo sapiens GN=GIMAP5 PE=1 SV=1	0	9.387	13	3	3	3	1	307	34.8	7.68	1.66	3
FALSE	High	Master Protein	P49750	YLP motif-containing protein 1 OS=Homo sapiens GN=YLPM1 PE=1 SV=3	0	9.381	3	3	4	3	1	1951	219.8	6.57	1.61	3
FALSE	High	Master Protein	Q8N684	Cleavage and polyadenylation specificity factor subunit 7 OS=Homo sapiens GN=CPSF7 PE=1 SV=1	0	9.369	9	3	3	3	1	471	52	8	0	3
FALSE	High	Master Protein	Q9UBF2	Coatomer subunit gamma-2 OS=Homo sapiens GN=COPG2 PE=1 SV=1	0	9.369	5	3	3	3	1	871	97.6	5.81	0	3
FALSE	High	Master Protein	Q9H2U2	Inorganic pyrophosphatase 2, mitochondrial OS=Homo sapiens GN=PPA2 PE=1 SV=2	0	9.331	10	2	3	2	1	334	37.9	7.39	2.08	2
FALSE	High	Master Protein	P25685	DnaJ homolog subfamily B member 1 OS=Homo sapiens GN=DNAJB1 PE=1 SV=4	0	9.285	13	4	4	4	1	340	38	8.63	0	4
FALSE	High	Master Protein	Q9NQP4	Prefoldin subunit 4 OS=Homo sapiens GN=PFDN4 PE=1 SV=1	0	9.232	20	2	2	2	1	134	15.3	4.53	5.56	2
FALSE	High	Master Protein	Q9HC38	Glyoxalase domain-containing protein 4 OS=Homo sapiens GN=GLOD4 PE=1 SV=1	0	9.229	11	2	4	2	1	313	34.8	5.6	4.27	2
FALSE	High	Master Protein	Q99729	Heterogeneous nuclear ribonucleoprotein A/B OS=Homo sapiens GN=HNRNPAB PE=1 SV=2	0	9.191	13	3	7	2	1	332	36.2	8.21	7.69	3
FALSE	High	Master Protein	P05556	Integrin beta-1 OS=Homo sapiens GN=ITGB1 PE=1 SV=2	0	9.184	5	3	3	3	1	798	88.4	5.39	0	3
FALSE	High	Master Protein	P55010	Eukaryotic translation initiation factor 5 OS=Homo sapiens GN=EIF5 PE=1 SV=2	0	9.141	10	3	3	3	1	431	49.2	5.58	1.61	3
FALSE	High	Master Protein	P00505	Aspartate aminotransferase, mitochondrial OS=Homo sapiens GN=GOT2 PE=1 SV=3	0	9.138	7	2	3	2	1	430	47.5	9.01	7.56	2
FALSE	High	Master Protein	P25788	Proteasome subunit alpha type-3 OS=Homo sapiens GN=PSMA3 PE=1 SV=2	0	9.124	8	2	6	2	1	255	28.4	5.33	1.63	2
FALSE	High	Master Protein	O60841	Eukaryotic translation initiation factor 5B OS=Homo sapiens GN=EIF5B PE=1 SV=4	0	9.107	6	3	4	3	1	1220	138.7	5.49	0	3
FALSE	High	Master Protein	P78406	mRNA export factor OS=Homo sapiens GN=RAE1 PE=1 SV=1	0	9.101	13	3	3	3	1	368	40.9	7.83	2.08	3
FALSE	High	Master Protein	P49903	Selenide, water dikinase 1 OS=Homo sapiens GN=SEPHS1 PE=1 SV=2	0	9.076	9	2	3	2	1	392	42.9	5.97	0	2
FALSE	High	Master Protein	O95831	Apoptosis-inducing factor 1, mitochondrial OS=Homo sapiens GN=AIFM1 PE=1 SV=1	0	9.071	6	3	3	3	1	613	66.9	8.95	2.21	3
FALSE	High	Master Protein	Q86UE4	Protein LYRIC OS=Homo sapiens GN=MTDH PE=1 SV=2	0	9.035	10	3	3	3	1	582	63.8	9.32	2.03	3
FALSE	High	Master Protein	P00387	NADH-cytochrome b5 reductase 3 OS=Homo sapiens GN=CYB5R3 PE=1 SV=3	0	9.018	9	2	3	2	1	301	34.2	7.59	4	2
FALSE	High	Master Protein	Q8TEQ6	Gem-associated protein 5 OS=Homo sapiens GN=GEMIN5 PE=1 SV=3	0	8.988	3	3	3	3	1	1508	168.5	6.62	2.56	3
FALSE	High	Master Protein	Q15796	Mothers against decapentaplegic homolog 2 OS=Homo sapiens GN=SMAD2 PE=1 SV=1	0	8.984	10	3	4	3	1	467	52.3	6.58	0	3
FALSE	High	Master Protein	P61088	Ubiquitin-conjugating enzyme E2 N OS=Homo sapiens GN=UBE2N PE=1 SV=1	0	8.974	36	3	3	3	1	152	17.1	6.57	0	3
FALSE	High	Master Protein	O75347	Tubulin-specific chaperone A OS=Homo sapiens GN=TBCA PE=1 SV=3	0	8.876	27	2	6	2	1	108	12.8	5.29	0	2
FALSE	High	Master Protein	P24752	Acetyl-CoA acetyltransferase, mitochondrial OS=Homo sapiens GN=ACAT1 PE=1 SV=1	0	8.868	6	2	2	2	1	427	45.2	8.85	5.26	2
FALSE	High	Master Protein	Q13242	Serine/arginine-rich splicing factor 9 OS=Homo sapiens GN=SRSF9 PE=1 SV=1	0	8.862	21	3	4	3	1	221	25.5	8.65	0	3
FALSE	High	Master Protein	P08195	4F2 cell-surface antigen heavy chain OS=Homo sapiens GN=SLC3A2 PE=1 SV=3	0	8.843	8	3	4	3	1	630	68	5.01	3.08	3
FALSE	High	Master Protein	P61962	DDB1- and CUL4-associated factor 7 OS=Homo sapiens GN=DCAF7 PE=1 SV=1	0	8.817	9	2	2	2	1	342	38.9	5.52	2.27	2
FALSE	High	Master Protein	O15143	Actin-related protein 2/3 complex subunit 1B OS=Homo sapiens GN=ARPC1B PE=1 SV=3	0	8.791	15	3	3	2	1	372	40.9	8.35	0	3
FALSE	High	Master Protein	P78347	General transcription factor II-I OS=Homo sapiens GN=GTF2I PE=1 SV=2	0	8.789	5	3	3	3	1	998	112.3	6.39	5.08	3
FALSE	High	Master Protein	P63208	S-phase kinase-associated protein 1 OS=Homo sapiens GN=SKP1 PE=1 SV=2	0	8.773	18	2	2	2	1	163	18.6	4.54	3.52	2
FALSE	High	Master Protein	Q9BWF3	RNA-binding protein 4 OS=Homo sapiens GN=RBM4 PE=1 SV=1	0	8.772	12	2	2	2	1	364	40.3	7.08	3.08	2
FALSE	High	Master Protein	Q9BXP5	Serrate RNA effector molecule homolog OS=Homo sapiens GN=SRRT PE=1 SV=1	0	8.769	6	3	4	3	1	876	100.6	5.96	2.33	3
FALSE	High	Master Protein	Q99986	Serine/threonine-protein kinase VRK1 OS=Homo sapiens GN=VRK1 PE=1 SV=1	0	8.764	12	2	4	2	1	396	45.4	8.91	4.49	2
FALSE	High	Master Protein	P55209	Nucleosome assembly protein 1-like 1 OS=Homo sapiens GN=NAP1L1 PE=1 SV=1	0	8.761	16	3	3	3	1	391	45.3	4.46	1.99	3
FALSE	High	Master Protein	Q7Z7K6	Centromere protein V OS=Homo sapiens GN=CENPV PE=1 SV=1	0	8.757	20	3	3	3	1	275	29.9	9.73	0	3
FALSE	High	Master Protein	P62277	40S ribosomal protein S13 OS=Homo sapiens GN=RPS13 PE=1 SV=2	0	8.75	21	5	5	5	1	151	17.2	10.54	0	5
FALSE	High	Master Protein	Q96HE7	ERO1-like protein alpha OS=Homo sapiens GN=ERO1A PE=1 SV=2	0	8.747	7	2	3	2	1	468	54.4	5.68	0	2
FALSE	High	Master Protein	P28070	Proteasome subunit beta type-4 OS=Homo sapiens GN=PSMB4 PE=1 SV=4	0	8.744	17	3	3	3	1	264	29.2	5.97	4.43	3
FALSE	High	Master Protein	Q5TBB1	Ribonuclease H2 subunit B OS=Homo sapiens GN=RNASEH2B PE=1 SV=1	0	8.732	10	2	2	2	1	312	35.1	9.13	3.07	2
FALSE	High	Master Protein	O00303	Eukaryotic translation initiation factor 3 subunit F OS=Homo sapiens GN=EIF3F PE=1 SV=1	0	8.705	10	3	3	3	1	357	37.5	5.45	2.05	3
FALSE	High	Master Protein	P18615	Negative elongation factor E OS=Homo sapiens GN=NELFE PE=1 SV=3	0	8.698	9	3	3	3	1	380	43.2	9.33	0	3
FALSE	High	Master Protein	P98175	RNA-binding protein 10 OS=Homo sapiens GN=RBM10 PE=1 SV=3	0	8.686	3	2	2	2	1	930	103.5	5.97	2.31	2
FALSE	High	Master Protein	P39748	Flap endonuclease 1 OS=Homo sapiens GN=FEN1 PE=1 SV=1	0	8.657	12	3	3	3	1	380	42.6	8.62	4.98	3
FALSE	High	Master Protein	P41240	Tyrosine-protein kinase CSK OS=Homo sapiens GN=CSK PE=1 SV=1	0	8.654	11	4	4	4	1	450	50.7	7.06	0	4
FALSE	High	Master Protein	P06127	T-cell surface glycoprotein CD5 OS=Homo sapiens GN=CD5 PE=1 SV=2	0	8.626	6	2	2	2	1	495	54.5	8.21	1.83	2
FALSE	High	Master Protein	Q9H910	Hematological and neurological expressed 1-like protein OS=Homo sapiens GN=HN1L PE=1 SV=1	0	8.618	24	3	3	3	1	190	20.1	9.26	4.02	3
FALSE	High	Master Protein	P04040	Catalase OS=Homo sapiens GN=CAT PE=1 SV=3	0	8.615	7	2	3	2	1	527	59.7	7.39	3.05	2
FALSE	High	Master Protein	P13693	Translationally-controlled tumor protein OS=Homo sapiens GN=TPT1 PE=1 SV=1	0	8.61	17	3	4	3	1	172	19.6	4.93	4.6	3
FALSE	High	Master Protein	P10515	Dihydrolipoyllysine-residue acetyltransferase component of pyruvate dehydrogenase complex, mitochondrial OS=Homo sapiens GN=DLAT PE=1 SV=3	0	8.6	4	2	2	2	1	647	69	7.84	3.99	2
FALSE	High	Master Protein	Q7L014	Probable ATP-dependent RNA helicase DDX46 OS=Homo sapiens GN=DDX46 PE=1 SV=2	0	8.56	3	3	4	3	1	1031	117.3	9.29	2.4	3
FALSE	High	Master Protein	P33992	DNA replication licensing factor MCM5 OS=Homo sapiens GN=MCM5 PE=1 SV=5	0	8.532	8	4	5	4	1	734	82.2	8.37	5.07	4
FALSE	High	Master Protein	P26196	Probable ATP-dependent RNA helicase DDX6 OS=Homo sapiens GN=DDX6 PE=1 SV=2	0	8.527	6	2	3	2	1	483	54.4	8.66	0	2
FALSE	High	Master Protein	Q8NC51	Plasminogen activator inhibitor 1 RNA-binding protein OS=Homo sapiens GN=SERBP1 PE=1 SV=2	0	8.524	9	3	4	3	1	408	44.9	8.65	0	3
FALSE	High	Master Protein	Q9BZX2	Uridine-cytidine kinase 2 OS=Homo sapiens GN=UCK2 PE=1 SV=1	0	8.508	11	3	3	3	1	261	29.3	6.7	4.23	3
FALSE	High	Master Protein	O75150	E3 ubiquitin-protein ligase BRE1B OS=Homo sapiens GN=RNF40 PE=1 SV=4	0	8.492	5	3	3	3	1	1001	113.6	6.23	1.64	3
FALSE	High	Master Protein	P62195	26S protease regulatory subunit 8 OS=Homo sapiens GN=PSMC5 PE=1 SV=1	0	8.489	8	2	4	2	1	406	45.6	7.55	0	2
FALSE	High	Master Protein	P62304	Small nuclear ribonucleoprotein E OS=Homo sapiens GN=SNRPE PE=1 SV=1	0	8.473	45	3	4	3	1	92	10.8	9.44	2.68	3
FALSE	High	Master Protein	O00267	Transcription elongation factor SPT5 OS=Homo sapiens GN=SUPT5H PE=1 SV=1	0	8.44	6	3	3	3	1	1087	120.9	5.06	0	3
FALSE	High	Master Protein	O14929	Histone acetyltransferase type B catalytic subunit OS=Homo sapiens GN=HAT1 PE=1 SV=1	0	8.439	4	2	2	2	1	419	49.5	5.69	3.77	2
FALSE	High	Master Protein	P27707	Deoxycytidine kinase OS=Homo sapiens GN=DCK PE=1 SV=1	0	8.415	17	3	3	3	1	260	30.5	5.21	0	3
FALSE	High	Master Protein	P49593	Protein phosphatase 1F OS=Homo sapiens GN=PPM1F PE=1 SV=3	0	8.405	11	3	3	3	1	454	49.8	5.1	0	3
FALSE	High	Master Protein	Q14152	Eukaryotic translation initiation factor 3 subunit A OS=Homo sapiens GN=EIF3A PE=1 SV=1	0	8.405	2	3	4	3	1	1382	166.5	6.79	2.3	3
FALSE	High	Master Protein	Q9H6T3	RNA polymerase II-associated protein 3 OS=Homo sapiens GN=RPAP3 PE=1 SV=2	0	8.358	5	2	2	2	1	665	75.7	6.84	4	2
FALSE	High	Master Protein	Q9Y277	Voltage-dependent anion-selective channel protein 3 OS=Homo sapiens GN=VDAC3 PE=1 SV=1	0	8.332	11	2	2	2	1	283	30.6	8.66	4.83	2
FALSE	High	Master Protein	Q15637	Splicing factor 1 OS=Homo sapiens GN=SF1 PE=1 SV=4	0	8.323	8	3	3	3	1	639	68.3	8.98	1.75	3
FALSE	High	Master Protein	O95573	Long-chain-fatty-acid--CoA ligase 3 OS=Homo sapiens GN=ACSL3 PE=1 SV=3	0	8.272	6	3	3	2	1	720	80.4	8.38	0	3
FALSE	High	Master Protein	A6NHR9	Structural maintenance of chromosomes flexible hinge domain-containing protein 1 OS=Homo sapiens GN=SMCHD1 PE=1 SV=2	0	8.265	2	3	3	3	1	2005	226.2	7.3	1.89	3
FALSE	High	Master Protein	Q9BQ39	ATP-dependent RNA helicase DDX50 OS=Homo sapiens GN=DDX50 PE=1 SV=1	0	8.259	5	3	3	1	1	737	82.5	9.17	3.64	3
FALSE	High	Master Protein	P28065	Proteasome subunit beta type-9 OS=Homo sapiens GN=PSMB9 PE=1 SV=2	0	8.252	19	3	3	3	1	219	23.3	5.03	0	3
FALSE	High	Master Protein	P30048	Thioredoxin-dependent peroxide reductase, mitochondrial OS=Homo sapiens GN=PRDX3 PE=1 SV=3	0	8.244	16	2	3	2	1	256	27.7	7.78	5.67	2
FALSE	High	Master Protein	P49591	Serine--tRNA ligase, cytoplasmic OS=Homo sapiens GN=SARS PE=1 SV=3	0	8.232	4	2	2	2	1	514	58.7	6.43	4.2	2
FALSE	High	Master Protein	P49189	4-trimethylaminobutyraldehyde dehydrogenase OS=Homo sapiens GN=ALDH9A1 PE=1 SV=3	0	8.217	10	3	3	3	1	494	53.8	5.87	1.99	3
FALSE	High	Master Protein	O60711	Leupaxin OS=Homo sapiens GN=LPXN PE=1 SV=1	0	8.207	10	2	2	2	1	386	43.3	6.01	0	2
FALSE	High	Master Protein	Q9Y5J1	U3 small nucleolar RNA-associated protein 18 homolog OS=Homo sapiens GN=UTP18 PE=1 SV=3	0	8.186	5	2	2	2	1	556	62	8.76	4.69	2
FALSE	High	Master Protein	P62244	40S ribosomal protein S15a OS=Homo sapiens GN=RPS15A PE=1 SV=2	0	8.181	13	2	3	2	1	130	14.8	10.13	1.61	2
FALSE	High	Master Protein	Q04837	Single-stranded DNA-binding protein, mitochondrial OS=Homo sapiens GN=SSBP1 PE=1 SV=1	0	8.17	20	2	3	2	1	148	17.2	9.6	7.15	2
FALSE	High	Master Protein	Q9UHY7	Enolase-phosphatase E1 OS=Homo sapiens GN=ENOPH1 PE=1 SV=1	0	8.145	13	2	3	2	1	261	28.9	4.78	0	2
FALSE	High	Master Protein	Q86U42	Polyadenylate-binding protein 2 OS=Homo sapiens GN=PABPN1 PE=1 SV=3	0	8.126	18	2	2	2	1	306	32.7	5.06	5.61	2
FALSE	High	Master Protein	P14649	Myosin light chain 6B OS=Homo sapiens GN=MYL6B PE=1 SV=1	0	8.105	12	2	4	2	1	208	22.8	5.73	0	2
FALSE	High	Master Protein	P16284	Platelet endothelial cell adhesion molecule OS=Homo sapiens GN=PECAM1 PE=1 SV=1	0	8.072	6	3	3	3	1	738	82.5	6.99	2.47	3
FALSE	High	Master Protein	P51571	Translocon-associated protein subunit delta OS=Homo sapiens GN=SSR4 PE=1 SV=1	0	8.068	20	3	4	3	1	173	19	6.15	0	3
FALSE	High	Master Protein	P23634	Plasma membrane calcium-transporting ATPase 4 OS=Homo sapiens GN=ATP2B4 PE=1 SV=2	0	8.064	3	2	2	2	1	1241	137.8	6.6	4.47	2
FALSE	High	Master Protein	A0AVT1	Ubiquitin-like modifier-activating enzyme 6 OS=Homo sapiens GN=UBA6 PE=1 SV=1	0	8.036	3	3	3	3	1	1052	117.9	6.14	1.73	3
FALSE	High	Master Protein	O60234	Glia maturation factor gamma OS=Homo sapiens GN=GMFG PE=1 SV=1	0	8.03	27	3	4	3	1	142	16.8	5.26	5.48	3
FALSE	High	Master Protein	O15144	Actin-related protein 2/3 complex subunit 2 OS=Homo sapiens GN=ARPC2 PE=1 SV=1	0	8.015	9	3	4	3	1	300	34.3	7.36	2.09	3
FALSE	High	Master Protein	O76021	Ribosomal L1 domain-containing protein 1 OS=Homo sapiens GN=RSL1D1 PE=1 SV=3	0	7.999	6	2	3	2	1	490	54.9	10.13	0	2
FALSE	High	Master Protein	P62906	60S ribosomal protein L10a OS=Homo sapiens GN=RPL10A PE=1 SV=2	0	7.994	13	2	3	2	1	217	24.8	9.94	3.43	2
FALSE	High	Master Protein	Q14155	Rho guanine nucleotide exchange factor 7 OS=Homo sapiens GN=ARHGEF7 PE=1 SV=2	0	7.987	3	2	2	1	1	803	90	7.09	2.27	2
FALSE	High	Master Protein	Q14318	Peptidyl-prolyl cis-trans isomerase FKBP8 OS=Homo sapiens GN=FKBP8 PE=1 SV=2	0	7.978	8	2	2	2	1	412	44.5	4.84	3.77	2
FALSE	High	Master Protein	Q15067	Peroxisomal acyl-coenzyme A oxidase 1 OS=Homo sapiens GN=ACOX1 PE=1 SV=3	0	7.965	6	2	2	2	1	660	74.4	8.16	2.11	2
FALSE	High	Master Protein	P63010	AP-2 complex subunit beta OS=Homo sapiens GN=AP2B1 PE=1 SV=1	0	7.964	2	2	2	2	1	937	104.5	5.38	1.67	2
FALSE	High	Master Protein	Q9UJZ1	Stomatin-like protein 2, mitochondrial OS=Homo sapiens GN=STOML2 PE=1 SV=1	0	7.941	15	3	4	3	1	356	38.5	7.39	0	3
FALSE	High	Master Protein	P50995	Annexin A11 OS=Homo sapiens GN=ANXA11 PE=1 SV=1	0	7.93	7	3	4	3	1	505	54.4	7.65	1.79	3
FALSE	High	Master Protein	P35249	Replication factor C subunit 4 OS=Homo sapiens GN=RFC4 PE=1 SV=2	0	7.91	8	2	2	2	1	363	39.7	8.02	3.93	2
FALSE	High	Master Protein	P02768	Serum albumin OS=Homo sapiens GN=ALB PE=1 SV=2	0	7.893	4	3	5	3	1	609	69.3	6.28	4.69	3
FALSE	High	Master Protein	P31350	Ribonucleoside-diphosphate reductase subunit M2 OS=Homo sapiens GN=RRM2 PE=1 SV=1	0	7.858	7	2	2	2	1	389	44.8	5.38	5.25	2
FALSE	High	Master Protein	Q9P0L0	Vesicle-associated membrane protein-associated protein A OS=Homo sapiens GN=VAPA PE=1 SV=3	0	7.856	18	3	4	3	1	249	27.9	8.62	0	3
FALSE	High	Master Protein	P43686	26S protease regulatory subunit 6B OS=Homo sapiens GN=PSMC4 PE=1 SV=2	0	7.83	11	3	3	3	1	418	47.3	5.21	0	3
FALSE	High	Master Protein	Q96QK1	Vacuolar protein sorting-associated protein 35 OS=Homo sapiens GN=VPS35 PE=1 SV=2	0	7.827	5	3	3	3	1	796	91.6	5.49	1.9	3
FALSE	High	Master Protein	Q9GZR7	ATP-dependent RNA helicase DDX24 OS=Homo sapiens GN=DDX24 PE=1 SV=1	0	7.814	7	3	3	3	1	859	96.3	9.06	0	3
FALSE	High	Master Protein	P49915	GMP synthase [glutamine-hydrolyzing] OS=Homo sapiens GN=GMPS PE=1 SV=1	0	7.785	9	4	5	4	1	693	76.7	6.87	0	4
FALSE	High	Master Protein	P12236	ADP/ATP translocase 3 OS=Homo sapiens GN=SLC25A6 PE=1 SV=4	0	7.753	11	3	3	2	1	298	32.8	9.74	2.05	3
FALSE	High	Master Protein	P07339	Cathepsin D OS=Homo sapiens GN=CTSD PE=1 SV=1	0	7.738	15	4	5	4	1	412	44.5	6.54	1.62	4
FALSE	High	Master Protein	Q92888	Rho guanine nucleotide exchange factor 1 OS=Homo sapiens GN=ARHGEF1 PE=1 SV=2	0	7.729	6	4	4	4	1	912	102.4	5.66	2.02	4
FALSE	High	Master Protein	P30419	Glycylpeptide N-tetradecanoyltransferase 1 OS=Homo sapiens GN=NMT1 PE=1 SV=2	0	7.725	5	2	4	2	1	496	56.8	7.8	2.03	2
FALSE	High	Master Protein	Q99798	Aconitate hydratase, mitochondrial OS=Homo sapiens GN=ACO2 PE=1 SV=2	0	7.72	4	2	2	2	1	780	85.4	7.61	4.97	2
FALSE	High	Master Protein	Q96S44	TP53-regulating kinase OS=Homo sapiens GN=TP53RK PE=1 SV=2	0	7.719	8	1	2	1	1	253	28.1	9.54	0	1
FALSE	High	Master Protein	P18031	Tyrosine-protein phosphatase non-receptor type 1 OS=Homo sapiens GN=PTPN1 PE=1 SV=1	0	7.717	5	2	2	2	1	435	49.9	6.27	4.86	2
FALSE	High	Master Protein	O75995	SAM and SH3 domain-containing protein 3 OS=Homo sapiens GN=SASH3 PE=1 SV=2	0	7.714	23	3	3	3	1	380	41.6	5.27	2.44	3
FALSE	High	Master Protein	P08047	Transcription factor Sp1 OS=Homo sapiens GN=SP1 PE=1 SV=3	0	7.681	8	2	2	2	1	785	80.6	7.34	2.21	2
FALSE	High	Master Protein	P21281	V-type proton ATPase subunit B, brain isoform OS=Homo sapiens GN=ATP6V1B2 PE=1 SV=3	0	7.678	6	2	3	2	1	511	56.5	5.81	3.31	2
FALSE	High	Master Protein	Q9Y6W5	Wiskott-Aldrich syndrome protein family member 2 OS=Homo sapiens GN=WASF2 PE=1 SV=3	0	7.67	6	2	2	2	1	498	54.3	5.53	3.92	2
FALSE	High	Master Protein	O95816	BAG family molecular chaperone regulator 2 OS=Homo sapiens GN=BAG2 PE=1 SV=1	0	7.668	13	2	2	2	1	211	23.8	6.7	0	2
FALSE	High	Master Protein	P42704	Leucine-rich PPR motif-containing protein, mitochondrial OS=Homo sapiens GN=LRPPRC PE=1 SV=3	0	7.667	2	2	2	2	1	1394	157.8	6.13	2.27	2
FALSE	High	Master Protein	P42677	40S ribosomal protein S27 OS=Homo sapiens GN=RPS27 PE=1 SV=3	0	7.654	15	1	5	1	1	84	9.5	9.45	6.41	1
FALSE	High	Master Protein	Q96G03	Phosphoglucomutase-2 OS=Homo sapiens GN=PGM2 PE=1 SV=4	0	7.649	10	3	3	3	1	612	68.2	6.73	2.06	3
FALSE	High	Master Protein	P59998	Actin-related protein 2/3 complex subunit 4 OS=Homo sapiens GN=ARPC4 PE=1 SV=3	0	7.6	16	3	5	3	1	168	19.7	8.43	9.46	3
FALSE	High	Master Protein	Q9NX63	MICOS complex subunit MIC19 OS=Homo sapiens GN=CHCHD3 PE=1 SV=1	0	7.592	11	2	2	2	1	227	26.1	8.28	4.84	2
FALSE	High	Master Protein	P05198	Eukaryotic translation initiation factor 2 subunit 1 OS=Homo sapiens GN=EIF2S1 PE=1 SV=3	0	7.59	9	2	2	2	1	315	36.1	5.08	0	2
FALSE	High	Master Protein	P55327	Tumor protein D52 OS=Homo sapiens GN=TPD52 PE=1 SV=2	0	7.58	23	2	2	2	1	224	24.3	4.83	1.74	2
FALSE	High	Master Protein	O00193	Small acidic protein OS=Homo sapiens GN=SMAP PE=1 SV=1	0	7.576	25	2	2	2	1	183	20.3	4.72	0	2
FALSE	High	Master Protein	P63167	Dynein light chain 1, cytoplasmic OS=Homo sapiens GN=DYNLL1 PE=1 SV=1	0	7.555	25	1	3	1	1	89	10.4	7.4	3.19	1
FALSE	High	Master Protein	P46781	40S ribosomal protein S9 OS=Homo sapiens GN=RPS9 PE=1 SV=3	0	7.542	16	4	6	4	1	194	22.6	10.65	2.06	4
FALSE	High	Master Protein	P26373	60S ribosomal protein L13 OS=Homo sapiens GN=RPL13 PE=1 SV=4	0	7.533	6	1	7	1	1	211	24.2	11.65	12.12	1
FALSE	High	Master Protein	P46779	60S ribosomal protein L28 OS=Homo sapiens GN=RPL28 PE=1 SV=3	0	7.499	20	3	4	3	1	137	15.7	12.02	0	3
FALSE	High	Master Protein	P49720	Proteasome subunit beta type-3 OS=Homo sapiens GN=PSMB3 PE=1 SV=2	0	7.479	8	1	4	1	1	205	22.9	6.55	4.51	1
FALSE	High	Master Protein	Q9P2R7	Succinate--CoA ligase [ADP-forming] subunit beta, mitochondrial OS=Homo sapiens GN=SUCLA2 PE=1 SV=3	0	7.465	5	2	2	2	1	463	50.3	7.42	0	2
FALSE	High	Master Protein	Q9H3P7	Golgi resident protein GCP60 OS=Homo sapiens GN=ACBD3 PE=1 SV=4	0	7.449	8	2	2	2	1	528	60.6	5.06	1.72	2
FALSE	High	Master Protein	Q15287	RNA-binding protein with serine-rich domain 1 OS=Homo sapiens GN=RNPS1 PE=1 SV=1	0	7.438	9	3	4	3	1	305	34.2	11.84	1.95	3
FALSE	High	Master Protein	O75368	SH3 domain-binding glutamic acid-rich-like protein OS=Homo sapiens GN=SH3BGRL PE=1 SV=1	0	7.432	36	3	3	3	1	114	12.8	5.25	0	3
FALSE	High	Master Protein	Q9BWD1	Acetyl-CoA acetyltransferase, cytosolic OS=Homo sapiens GN=ACAT2 PE=1 SV=2	0	7.412	15	2	4	2	1	397	41.3	6.92	0	2
FALSE	High	Master Protein	Q9HCE1	Putative helicase MOV-10 OS=Homo sapiens GN=MOV10 PE=1 SV=2	0	7.406	3	3	3	3	1	1003	113.6	8.82	3.55	3
FALSE	High	Master Protein	P11908	Ribose-phosphate pyrophosphokinase 2 OS=Homo sapiens GN=PRPS2 PE=1 SV=2	0	7.398	11	3	4	2	1	318	34.7	6.61	2.33	3
FALSE	High	Master Protein	O95336	6-phosphogluconolactonase OS=Homo sapiens GN=PGLS PE=1 SV=2	0	7.386	17	3	3	3	1	258	27.5	6.05	1.78	3
FALSE	High	Master Protein	Q14694	Ubiquitin carboxyl-terminal hydrolase 10 OS=Homo sapiens GN=USP10 PE=1 SV=2	0	7.381	7	3	3	3	1	798	87.1	5.31	0	3
FALSE	High	Master Protein	A0A5B9	T-cell receptor beta-2 chain C region OS=Homo sapiens GN=TRBC2 PE=1 SV=1	0	7.372	14	2	2	2	1	178	20	6.18	0	2
FALSE	High	Master Protein	Q9H4A4	Aminopeptidase B OS=Homo sapiens GN=RNPEP PE=1 SV=2	0	7.364	6	3	3	3	1	650	72.5	5.74	0	3
FALSE	High	Master Protein	Q96G21	U3 small nucleolar ribonucleoprotein protein IMP4 OS=Homo sapiens GN=IMP4 PE=1 SV=1	0	7.353	8	2	2	2	1	291	33.7	9.47	2.11	2
FALSE	High	Master Protein	Q13243	Serine/arginine-rich splicing factor 5 OS=Homo sapiens GN=SRSF5 PE=1 SV=1	0	7.311	9	2	2	1	1	272	31.2	11.59	4.91	2
FALSE	High	Master Protein	P23381	Tryptophan--tRNA ligase, cytoplasmic OS=Homo sapiens GN=WARS PE=1 SV=2	0	7.309	17	3	3	3	1	471	53.1	6.23	0	3
FALSE	High	Master Protein	O76071	Probable cytosolic iron-sulfur protein assembly protein CIAO1 OS=Homo sapiens GN=CIAO1 PE=1 SV=1	0	7.303	10	2	2	2	1	339	37.8	4.97	1.9	2
FALSE	High	Master Protein	Q9H8Y8	Golgi reassembly-stacking protein 2 OS=Homo sapiens GN=GORASP2 PE=1 SV=3	0	7.302	6	2	3	2	1	452	47.1	4.82	4.46	2
FALSE	High	Master Protein	P56182	Ribosomal RNA processing protein 1 homolog A OS=Homo sapiens GN=RRP1 PE=1 SV=1	0	7.301	10	2	2	2	1	461	52.8	9.33	0	2
FALSE	High	Master Protein	Q5TDH0	Protein DDI1 homolog 2 OS=Homo sapiens GN=DDI2 PE=1 SV=1	0	7.298	11	3	3	3	1	399	44.5	5.05	1.69	3
FALSE	High	Master Protein	Q9BT78	COP9 signalosome complex subunit 4 OS=Homo sapiens GN=COPS4 PE=1 SV=1	0	7.284	9	2	3	2	1	406	46.2	5.83	1.79	2
FALSE	High	Master Protein	P60891	Ribose-phosphate pyrophosphokinase 1 OS=Homo sapiens GN=PRPS1 PE=1 SV=2	0	7.269	10	2	3	1	1	318	34.8	6.98	2.33	2
FALSE	High	Master Protein	P04818	Thymidylate synthase OS=Homo sapiens GN=TYMS PE=1 SV=3	0	7.22	11	2	3	2	1	313	35.7	7.01	2.44	2
FALSE	High	Master Protein	O43837	Isocitrate dehydrogenase [NAD] subunit beta, mitochondrial OS=Homo sapiens GN=IDH3B PE=1 SV=2	0	7.213	11	3	3	3	1	385	42.2	8.46	0	3
FALSE	High	Master Protein	Q14008	Cytoskeleton-associated protein 5 OS=Homo sapiens GN=CKAP5 PE=1 SV=3	0	7.207	2	3	3	3	1	2032	225.4	7.8	1.84	3
FALSE	High	Master Protein	Q01581	Hydroxymethylglutaryl-CoA synthase, cytoplasmic OS=Homo sapiens GN=HMGCS1 PE=1 SV=2	0	7.205	6	2	2	2	1	520	57.3	5.41	2.14	2
FALSE	High	Master Protein	O75396	Vesicle-trafficking protein SEC22b OS=Homo sapiens GN=SEC22B PE=1 SV=4	0	7.164	15	2	3	2	1	215	24.6	6.92	1.98	2
FALSE	High	Master Protein	Q9BY44	Eukaryotic translation initiation factor 2A OS=Homo sapiens GN=EIF2A PE=1 SV=3	0	7.162	8	3	3	3	1	585	64.9	8.87	1.86	3
FALSE	High	Master Protein	O14744	Protein arginine N-methyltransferase 5 OS=Homo sapiens GN=PRMT5 PE=1 SV=4	0	7.16	4	2	3	2	1	637	72.6	6.29	3.79	2
FALSE	High	Master Protein	P19784	Casein kinase II subunit alpha' OS=Homo sapiens GN=CSNK2A2 PE=1 SV=1	0	7.155	6	1	2	1	1	350	41.2	8.56	0	1
FALSE	High	Master Protein	Q5T9A4	ATPase family AAA domain-containing protein 3B OS=Homo sapiens GN=ATAD3B PE=1 SV=1	0	7.092	4	2	3	1	1	648	72.5	9.2	2.11	2
FALSE	High	Master Protein	P00403	Cytochrome c oxidase subunit 2 OS=Homo sapiens GN=MT-CO2 PE=1 SV=1	0	7.075	15	3	3	3	1	227	25.5	4.82	0	3
FALSE	High	Master Protein	Q9BTE3	Mini-chromosome maintenance complex-binding protein OS=Homo sapiens GN=MCMBP PE=1 SV=2	0	7.069	5	2	2	2	1	642	72.9	5.87	2.22	2
FALSE	High	Master Protein	Q9Y5M8	Signal recognition particle receptor subunit beta OS=Homo sapiens GN=SRPRB PE=1 SV=3	0	7.067	13	2	2	2	1	271	29.7	9.04	1.77	2
FALSE	High	Master Protein	Q07666	KH domain-containing, RNA-binding, signal transduction-associated protein 1 OS=Homo sapiens GN=KHDRBS1 PE=1 SV=1	0	7.038	9	1	3	1	1	443	48.2	8.66	0	1
FALSE	High	Master Protein	Q14203	Dynactin subunit 1 OS=Homo sapiens GN=DCTN1 PE=1 SV=3	0	7.036	2	2	2	2	1	1278	141.6	5.81	2.1	2
FALSE	High	Master Protein	Q9Y3I0	tRNA-splicing ligase RtcB homolog OS=Homo sapiens GN=RTCB PE=1 SV=1	0	7.026	8	2	2	2	1	505	55.2	7.23	2.14	2
FALSE	High	Master Protein	Q9NSE4	Isoleucine--tRNA ligase, mitochondrial OS=Homo sapiens GN=IARS2 PE=1 SV=2	0	7.015	3	2	2	2	1	1012	113.7	7.2	2.67	2
FALSE	High	Master Protein	Q96ER3	Protein SAAL1 OS=Homo sapiens GN=SAAL1 PE=1 SV=2	0	7.012	7	2	2	2	1	474	53.5	4.5	2.86	2
FALSE	High	Master Protein	Q12824	SWI/SNF-related matrix-associated actin-dependent regulator of chromatin subfamily B member 1 OS=Homo sapiens GN=SMARCB1 PE=1 SV=2	0	7.005	8	2	2	2	1	385	44.1	6.23	2.16	2
FALSE	High	Master Protein	Q53F19	Nuclear cap-binding protein subunit 3 OS=Homo sapiens GN=NCBP3 PE=1 SV=2	0	6.976	4	2	2	2	1	620	70.5	5.73	3.64	2
FALSE	High	Master Protein	O00182	Galectin-9 OS=Homo sapiens GN=LGALS9 PE=1 SV=2	0	6.975	7	2	2	2	1	355	39.5	9.17	2.07	2
FALSE	High	Master Protein	Q16512	Serine/threonine-protein kinase N1 OS=Homo sapiens GN=PKN1 PE=1 SV=2	0	6.966	4	2	2	2	1	942	103.9	6.37	0	2
FALSE	High	Master Protein	Q9H0S4	Probable ATP-dependent RNA helicase DDX47 OS=Homo sapiens GN=DDX47 PE=1 SV=1	0	6.956	5	2	2	2	1	455	50.6	9.1	2.07	2
FALSE	High	Master Protein	O75131	Copine-3 OS=Homo sapiens GN=CPNE3 PE=1 SV=1	0	6.954	15	4	4	4	1	537	60.1	5.85	0	4
FALSE	High	Master Protein	O75792	Ribonuclease H2 subunit A OS=Homo sapiens GN=RNASEH2A PE=1 SV=2	0	6.95	13	3	3	3	1	299	33.4	5.25	1.78	3
FALSE	High	Master Protein	P22033	Methylmalonyl-CoA mutase, mitochondrial OS=Homo sapiens GN=MUT PE=1 SV=4	0	6.946	4	2	2	2	1	750	83.1	6.93	0	2
FALSE	High	Master Protein	P09110	3-ketoacyl-CoA thiolase, peroxisomal OS=Homo sapiens GN=ACAA1 PE=1 SV=2	0	6.932	10	2	2	2	1	424	44.3	8.44	0	2
FALSE	High	Master Protein	Q9NYL9	Tropomodulin-3 OS=Homo sapiens GN=TMOD3 PE=1 SV=1	0	6.908	9	2	3	2	1	352	39.6	5.19	3.87	2
FALSE	High	Master Protein	Q8TBC4	NEDD8-activating enzyme E1 catalytic subunit OS=Homo sapiens GN=UBA3 PE=1 SV=2	0	6.897	5	2	2	2	1	463	51.8	5.45	1.86	2
FALSE	High	Master Protein	P05455	Lupus La protein OS=Homo sapiens GN=SSB PE=1 SV=2	0	6.881	11	3	3	3	1	408	46.8	7.12	0	3
FALSE	High	Master Protein	A0FGR8	Extended synaptotagmin-2 OS=Homo sapiens GN=ESYT2 PE=1 SV=1	0	6.871	2	2	2	2	1	921	102.3	9.26	1.82	2
FALSE	High	Master Protein	P52789	Hexokinase-2 OS=Homo sapiens GN=HK2 PE=1 SV=2	0	6.87	3	2	2	2	1	917	102.3	6.05	1.7	2
FALSE	High	Master Protein	O76094	Signal recognition particle subunit SRP72 OS=Homo sapiens GN=SRP72 PE=1 SV=3	0	6.843	5	2	2	2	1	671	74.6	9.26	2.71	2
FALSE	High	Master Protein	P09661	U2 small nuclear ribonucleoprotein A' OS=Homo sapiens GN=SNRPA1 PE=1 SV=2	0	6.817	7	1	3	1	1	255	28.4	8.62	1.69	1
FALSE	High	Master Protein	Q99460	26S proteasome non-ATPase regulatory subunit 1 OS=Homo sapiens GN=PSMD1 PE=1 SV=2	0	6.804	3	2	3	2	1	953	105.8	5.39	0	2
FALSE	High	Master Protein	O94906	Pre-mRNA-processing factor 6 OS=Homo sapiens GN=PRPF6 PE=1 SV=1	0	6.773	4	3	3	3	1	941	106.9	8.25	0	3
FALSE	High	Master Protein	P49790	Nuclear pore complex protein Nup153 OS=Homo sapiens GN=NUP153 PE=1 SV=2	0	6.772	2	3	3	3	1	1475	153.8	8.73	0	3
FALSE	High	Master Protein	Q9GZZ9	Ubiquitin-like modifier-activating enzyme 5 OS=Homo sapiens GN=UBA5 PE=1 SV=1	0	6.766	12	2	2	2	1	404	44.8	4.84	0	2
FALSE	High	Master Protein	Q9UQE7	Structural maintenance of chromosomes protein 3 OS=Homo sapiens GN=SMC3 PE=1 SV=2	0	6.766	3	2	2	2	1	1217	141.5	7.18	0	2
FALSE	High	Master Protein	Q14683	Structural maintenance of chromosomes protein 1A OS=Homo sapiens GN=SMC1A PE=1 SV=2	0	6.762	4	3	3	3	1	1233	143.1	7.64	0	3
FALSE	High	Master Protein	Q9BZF1	Oxysterol-binding protein-related protein 8 OS=Homo sapiens GN=OSBPL8 PE=1 SV=3	0	6.749	4	2	2	2	1	889	101.1	6.96	1.63	2
FALSE	High	Master Protein	P47914	60S ribosomal protein L29 OS=Homo sapiens GN=RPL29 PE=1 SV=2	0	6.746	10	2	3	2	1	159	17.7	11.66	3.4	2
FALSE	High	Master Protein	Q16629	Serine/arginine-rich splicing factor 7 OS=Homo sapiens GN=SRSF7 PE=1 SV=1	0	6.727	13	3	4	2	1	238	27.4	11.82	0	3
FALSE	High	Master Protein	O00487	26S proteasome non-ATPase regulatory subunit 14 OS=Homo sapiens GN=PSMD14 PE=1 SV=1	0	6.698	13	2	2	2	1	310	34.6	6.52	0	2
FALSE	High	Master Protein	Q13363	C-terminal-binding protein 1 OS=Homo sapiens GN=CTBP1 PE=1 SV=2	0	6.686	7	2	2	2	1	440	47.5	6.77	3.98	2
FALSE	High	Master Protein	P12544	Granzyme A OS=Homo sapiens GN=GZMA PE=1 SV=2	0	6.681	11	2	2	2	1	262	29	8.91	0	2
FALSE	High	Master Protein	Q14011	Cold-inducible RNA-binding protein OS=Homo sapiens GN=CIRBP PE=1 SV=1	0	6.678	8	2	2	2	1	172	18.6	9.51	2.04	2
FALSE	High	Master Protein	O00139	Kinesin-like protein KIF2A OS=Homo sapiens GN=KIF2A PE=1 SV=3	0	6.671	4	2	2	2	1	706	79.9	6.68	3.64	2
FALSE	High	Master Protein	Q92747	Actin-related protein 2/3 complex subunit 1A OS=Homo sapiens GN=ARPC1A PE=1 SV=2	0	6.668	9	2	2	1	1	370	41.5	8.18	0	2
FALSE	High	Master Protein	P15104	Glutamine synthetase OS=Homo sapiens GN=GLUL PE=1 SV=4	0	6.66	10	2	2	2	1	373	42	6.89	0	2
FALSE	High	Master Protein	P49756	RNA-binding protein 25 OS=Homo sapiens GN=RBM25 PE=1 SV=3	0	6.65	6	3	4	3	1	843	100.1	6.32	0	3
FALSE	High	Master Protein	Q9UHB9	Signal recognition particle subunit SRP68 OS=Homo sapiens GN=SRP68 PE=1 SV=2	0	6.648	4	2	2	2	1	627	70.7	8.56	1.9	2
FALSE	High	Master Protein	P40763	Signal transducer and activator of transcription 3 OS=Homo sapiens GN=STAT3 PE=1 SV=2	0	6.645	4	2	2	2	1	770	88	6.3	2.61	2
FALSE	High	Master Protein	P17858	ATP-dependent 6-phosphofructokinase, liver type OS=Homo sapiens GN=PFKL PE=1 SV=6	0	6.637	3	2	2	1	1	780	85	7.5	0	2
FALSE	High	Master Protein	Q92979	Ribosomal RNA small subunit methyltransferase NEP1 OS=Homo sapiens GN=EMG1 PE=1 SV=4	0	6.624	10	2	2	2	1	244	26.7	9.17	1.78	2
FALSE	High	Master Protein	Q6FI81	Anamorsin OS=Homo sapiens GN=CIAPIN1 PE=1 SV=2	0	6.619	13	3	3	3	1	312	33.6	5.62	2.1	3
FALSE	High	Master Protein	O95433	Activator of 90 kDa heat shock protein ATPase homolog 1 OS=Homo sapiens GN=AHSA1 PE=1 SV=1	0	6.617	12	3	3	3	1	338	38.3	5.53	3.58	3
FALSE	High	Master Protein	O43847	Nardilysin OS=Homo sapiens GN=NRDC PE=1 SV=2	0	6.61	2	2	2	2	1	1150	131.5	5	3.78	2
FALSE	High	Master Protein	Q7Z417	Nuclear fragile X mental retardation-interacting protein 2 OS=Homo sapiens GN=NUFIP2 PE=1 SV=1	0	6.607	5	2	2	2	1	695	76.1	8.7	1.81	2
FALSE	High	Master Protein	Q92769	Histone deacetylase 2 OS=Homo sapiens GN=HDAC2 PE=1 SV=2	0	6.603	6	2	3	2	1	488	55.3	5.91	3.87	2
FALSE	High	Master Protein	P36542	ATP synthase subunit gamma, mitochondrial OS=Homo sapiens GN=ATP5C1 PE=1 SV=1	0	6.602	8	2	2	2	1	298	33	9.22	4.6	2
FALSE	High	Master Protein	O95819	Mitogen-activated protein kinase kinase kinase kinase 4 OS=Homo sapiens GN=MAP4K4 PE=1 SV=2	0	6.6	2	2	2	2	1	1239	142	7.46	3.49	2
FALSE	High	Master Protein	P50402	Emerin OS=Homo sapiens GN=EMD PE=1 SV=1	0	6.567	11	2	2	2	1	254	29	5.5	2.64	2
FALSE	High	Master Protein	P54105	Methylosome subunit pICln OS=Homo sapiens GN=CLNS1A PE=1 SV=1	0	6.564	19	2	3	2	1	237	26.2	4.11	1.6	2
FALSE	High	Master Protein	Q13428	Treacle protein OS=Homo sapiens GN=TCOF1 PE=1 SV=3	0	6.559	3	2	2	2	1	1488	152	9.04	0	2
FALSE	High	Master Protein	Q9Y4L1	Hypoxia up-regulated protein 1 OS=Homo sapiens GN=HYOU1 PE=1 SV=1	0	6.557	4	3	3	3	1	999	111.3	5.22	0	3
FALSE	High	Master Protein	O75663	TIP41-like protein OS=Homo sapiens GN=TIPRL PE=1 SV=2	0	6.546	16	3	3	3	1	272	31.4	5.91	0	3
FALSE	High	Master Protein	Q9H0D6	5'-3' exoribonuclease 2 OS=Homo sapiens GN=XRN2 PE=1 SV=1	0	6.525	3	2	2	2	1	950	108.5	7.47	0	2
FALSE	High	Master Protein	P32121	Beta-arrestin-2 OS=Homo sapiens GN=ARRB2 PE=1 SV=2	0	6.516	8	2	2	2	1	409	46.1	7.69	0	2
FALSE	High	Master Protein	Q8TC07	TBC1 domain family member 15 OS=Homo sapiens GN=TBC1D15 PE=1 SV=2	0	6.508	4	2	2	2	1	691	79.4	5.67	0	2
FALSE	High	Master Protein	O95793	Double-stranded RNA-binding protein Staufen homolog 1 OS=Homo sapiens GN=STAU1 PE=1 SV=2	0	6.507	5	2	2	2	1	577	63.1	9.44	2.25	2
FALSE	High	Master Protein	Q9GZS3	WD repeat-containing protein 61 OS=Homo sapiens GN=WDR61 PE=1 SV=1	0	6.499	12	2	3	2	1	305	33.6	5.47	0	2
FALSE	High	Master Protein	P28340	DNA polymerase delta catalytic subunit OS=Homo sapiens GN=POLD1 PE=1 SV=2	0	6.496	2	2	2	2	1	1107	123.6	7.03	0	2
FALSE	High	Master Protein	Q86YZ3	Hornerin OS=Homo sapiens GN=HRNR PE=1 SV=2	0	6.484	3	2	3	2	1	2850	282.2	10.04	2.16	2
FALSE	High	Master Protein	P20618	Proteasome subunit beta type-1 OS=Homo sapiens GN=PSMB1 PE=1 SV=2	0	6.48	4	1	3	1	1	241	26.5	8.13	1.61	1
FALSE	High	Master Protein	P55735	Protein SEC13 homolog OS=Homo sapiens GN=SEC13 PE=1 SV=3	0	6.479	12	2	2	2	1	322	35.5	5.48	0	2
FALSE	High	Master Protein	Q9NZZ3	Charged multivesicular body protein 5 OS=Homo sapiens GN=CHMP5 PE=1 SV=1	0	6.468	19	2	2	2	1	219	24.6	4.83	0	2
FALSE	High	Master Protein	P28072	Proteasome subunit beta type-6 OS=Homo sapiens GN=PSMB6 PE=1 SV=4	0	6.448	9	2	4	2	1	239	25.3	4.92	7.15	2
FALSE	High	Master Protein	Q4V328	GRIP1-associated protein 1 OS=Homo sapiens GN=GRIPAP1 PE=1 SV=1	0	6.431	5	2	2	2	1	841	95.9	5.11	0	2
FALSE	High	Master Protein	P17812	CTP synthase 1 OS=Homo sapiens GN=CTPS1 PE=1 SV=2	0	6.427	3	2	3	2	1	591	66.6	6.46	4.14	2
FALSE	High	Master Protein	Q05086	Ubiquitin-protein ligase E3A OS=Homo sapiens GN=UBE3A PE=1 SV=4	0	6.421	3	2	2	2	1	875	100.6	5.22	1.81	2
FALSE	High	Master Protein	Q14137	Ribosome biogenesis protein BOP1 OS=Homo sapiens GN=BOP1 PE=1 SV=2	0	6.42	5	2	2	2	1	746	83.6	6.19	2.05	2
FALSE	High	Master Protein	P58546	Myotrophin OS=Homo sapiens GN=MTPN PE=1 SV=2	0	6.409	31	2	3	2	1	118	12.9	5.52	4.46	2
FALSE	High	Master Protein	O00506	Serine/threonine-protein kinase 25 OS=Homo sapiens GN=STK25 PE=1 SV=1	0	6.401	7	2	2	2	1	426	48.1	6.74	2.15	2
FALSE	High	Master Protein	Q9NVI7	ATPase family AAA domain-containing protein 3A OS=Homo sapiens GN=ATAD3A PE=1 SV=2	0	6.391	5	2	2	1	1	634	71.3	8.98	2.11	2
FALSE	High	Master Protein	O00161	Synaptosomal-associated protein 23 OS=Homo sapiens GN=SNAP23 PE=1 SV=1	0	6.355	15	2	2	2	1	211	23.3	5.01	2.08	2
FALSE	High	Master Protein	P29590	Protein PML OS=Homo sapiens GN=PML PE=1 SV=3	0	6.344	4	3	3	3	1	882	97.5	6.21	0	3
FALSE	High	Master Protein	Q9C0K0	B-cell lymphoma/leukemia 11B OS=Homo sapiens GN=BCL11B PE=1 SV=1	0	6.341	5	3	4	3	1	894	95.5	6.55	0	3
FALSE	High	Master Protein	Q7Z5L9	Interferon regulatory factor 2-binding protein 2 OS=Homo sapiens GN=IRF2BP2 PE=1 SV=2	0	6.326	5	2	2	2	1	587	61	8.69	1.74	2
FALSE	High	Master Protein	Q00403	Transcription initiation factor IIB OS=Homo sapiens GN=GTF2B PE=1 SV=1	0	6.32	7	2	2	2	1	316	34.8	8.35	1.83	2
FALSE	High	Master Protein	Q53GS9	U4/U6.U5 tri-snRNP-associated protein 2 OS=Homo sapiens GN=USP39 PE=1 SV=2	0	6.318	4	2	3	2	1	565	65.3	8.91	3.79	2
FALSE	High	Master Protein	Q71RC2	La-related protein 4 OS=Homo sapiens GN=LARP4 PE=1 SV=3	0	6.318	5	2	2	2	1	724	80.5	6.61	0	2
FALSE	High	Master Protein	P78318	Immunoglobulin-binding protein 1 OS=Homo sapiens GN=IGBP1 PE=1 SV=1	0	6.313	7	2	2	2	1	339	39.2	5.38	1.74	2
FALSE	High	Master Protein	P60900	Proteasome subunit alpha type-6 OS=Homo sapiens GN=PSMA6 PE=1 SV=1	0	6.311	10	2	3	2	1	246	27.4	6.76	3.75	2
FALSE	High	Master Protein	P29218	Inositol monophosphatase 1 OS=Homo sapiens GN=IMPA1 PE=1 SV=1	0	6.288	9	2	2	2	1	277	30.2	5.26	0	2
FALSE	High	Master Protein	Q9Y5P6	Mannose-1-phosphate guanyltransferase beta OS=Homo sapiens GN=GMPPB PE=1 SV=2	0	6.286	11	2	2	2	1	360	39.8	6.61	1.67	2
FALSE	High	Master Protein	P49458	Signal recognition particle 9 kDa protein OS=Homo sapiens GN=SRP9 PE=1 SV=2	0	6.274	22	2	3	2	1	86	10.1	7.97	4.11	2
FALSE	High	Master Protein	Q9H3P2	Negative elongation factor A OS=Homo sapiens GN=NELFA PE=1 SV=3	0	6.265	7	2	2	2	1	528	57.2	9.03	2.42	2
FALSE	High	Master Protein	P20290	Transcription factor BTF3 OS=Homo sapiens GN=BTF3 PE=1 SV=1	0	6.256	14	1	2	1	1	206	22.2	9.38	3.41	1
FALSE	High	Master Protein	Q9HDC9	Adipocyte plasma membrane-associated protein OS=Homo sapiens GN=APMAP PE=1 SV=2	0	6.247	6	2	3	2	1	416	46.5	6.16	1.8	2
FALSE	High	Master Protein	Q9UNN5	FAS-associated factor 1 OS=Homo sapiens GN=FAF1 PE=1 SV=2	0	6.245	4	2	2	2	1	650	73.9	4.88	1.74	2
FALSE	High	Master Protein	P52306	Rap1 GTPase-GDP dissociation stimulator 1 OS=Homo sapiens GN=RAP1GDS1 PE=1 SV=3	0	6.23	5	2	2	2	1	607	66.3	5.31	2.73	2
FALSE	High	Master Protein	P61353	60S ribosomal protein L27 OS=Homo sapiens GN=RPL27 PE=1 SV=2	0	6.228	15	2	3	2	1	136	15.8	10.56	4.46	2
FALSE	High	Master Protein	O60216	Double-strand-break repair protein rad21 homolog OS=Homo sapiens GN=RAD21 PE=1 SV=2	0	6.217	4	2	2	2	1	631	71.6	4.65	2.06	2
FALSE	High	Master Protein	O75940	Survival of motor neuron-related-splicing factor 30 OS=Homo sapiens GN=SMNDC1 PE=1 SV=1	0	6.203	14	2	2	2	1	238	26.7	7.24	1.74	2
FALSE	High	Master Protein	O75179	Ankyrin repeat domain-containing protein 17 OS=Homo sapiens GN=ANKRD17 PE=1 SV=3	0	6.202	1	2	2	1	1	2603	274.1	6.52	0	2
FALSE	High	Master Protein	P81605	Dermcidin OS=Homo sapiens GN=DCD PE=1 SV=2	0	6.153	13	2	2	2	1	110	11.3	6.54	2.08	2
FALSE	High	Master Protein	Q8IYB3	Serine/arginine repetitive matrix protein 1 OS=Homo sapiens GN=SRRM1 PE=1 SV=2	0	6.152	6	2	2	2	1	904	102.3	11.84	0	2
FALSE	High	Master Protein	Q5JTZ9	Alanine--tRNA ligase, mitochondrial OS=Homo sapiens GN=AARS2 PE=1 SV=1	0	6.141	2	2	2	2	1	985	107.3	6.27	2.31	2
FALSE	High	Master Protein	P38606	V-type proton ATPase catalytic subunit A OS=Homo sapiens GN=ATP6V1A PE=1 SV=2	0	6.121	5	2	2	2	1	617	68.3	5.52	2.85	2
FALSE	High	Master Protein	Q08380	Galectin-3-binding protein OS=Homo sapiens GN=LGALS3BP PE=1 SV=1	0	6.119	5	2	2	2	1	585	65.3	5.27	0	2
FALSE	High	Master Protein	P62851	40S ribosomal protein S25 OS=Homo sapiens GN=RPS25 PE=1 SV=1	0	6.114	15	2	3	2	1	125	13.7	10.11	4.25	2
FALSE	High	Master Protein	P25398	40S ribosomal protein S12 OS=Homo sapiens GN=RPS12 PE=1 SV=3	0	6.106	20	2	3	2	1	132	14.5	7.21	3.87	2
FALSE	High	Master Protein	Q13951	Core-binding factor subunit beta OS=Homo sapiens GN=CBFB PE=1 SV=2	0	6.079	15	3	3	3	1	182	21.5	6.6	0	3
FALSE	High	Master Protein	Q92973	Transportin-1 OS=Homo sapiens GN=TNPO1 PE=1 SV=2	0	6.067	3	2	2	2	1	898	102.3	4.98	1.69	2
FALSE	High	Master Protein	O75521	Enoyl-CoA delta isomerase 2, mitochondrial OS=Homo sapiens GN=ECI2 PE=1 SV=4	0	6.054	8	2	2	2	1	394	43.6	9	2.14	2
FALSE	High	Master Protein	Q9ULV4	Coronin-1C OS=Homo sapiens GN=CORO1C PE=1 SV=1	0	6.053	7	3	4	3	1	474	53.2	7.08	1.89	3
FALSE	High	Master Protein	Q9NR56	Muscleblind-like protein 1 OS=Homo sapiens GN=MBNL1 PE=1 SV=2	0	6.04	5	3	3	3	1	388	41.8	8.9	0	3
FALSE	High	Master Protein	P30405	Peptidyl-prolyl cis-trans isomerase F, mitochondrial OS=Homo sapiens GN=PPIF PE=1 SV=1	0	6.037	24	2	2	2	1	207	22	9.38	0	2
FALSE	High	Master Protein	P05387	60S acidic ribosomal protein P2 OS=Homo sapiens GN=RPLP2 PE=1 SV=1	0	6.029	39	2	2	2	1	115	11.7	4.54	2.29	2
FALSE	High	Master Protein	P08754	Guanine nucleotide-binding protein G(k) subunit alpha OS=Homo sapiens GN=GNAI3 PE=1 SV=3	0	6.022	7	2	4	1	1	354	40.5	5.69	4.72	2
FALSE	High	Master Protein	P19838	Nuclear factor NF-kappa-B p105 subunit OS=Homo sapiens GN=NFKB1 PE=1 SV=2	0	6.002	4	2	2	2	1	968	105.3	5.4	0	2
FALSE	High	Master Protein	P39019	40S ribosomal protein S19 OS=Homo sapiens GN=RPS19 PE=1 SV=2	0	5.997	19	2	2	2	1	145	16.1	10.32	1.89	2
FALSE	High	Master Protein	Q8TDP1	Ribonuclease H2 subunit C OS=Homo sapiens GN=RNASEH2C PE=1 SV=1	0	5.981	21	2	2	2	1	164	17.8	5.03	2.74	2
FALSE	High	Master Protein	P29558	RNA-binding motif, single-stranded-interacting protein 1 OS=Homo sapiens GN=RBMS1 PE=1 SV=3	0	5.945	7	2	2	2	1	406	44.5	8.79	0	2
FALSE	High	Master Protein	Q15007	Pre-mRNA-splicing regulator WTAP OS=Homo sapiens GN=WTAP PE=1 SV=2	0	5.942	8	2	2	2	1	396	44.2	5.19	0	2
FALSE	High	Master Protein	O95319	CUGBP Elav-like family member 2 OS=Homo sapiens GN=CELF2 PE=1 SV=1	0	5.935	5	2	3	2	1	508	54.3	8.76	1.98	2
FALSE	High	Master Protein	Q8IZP0	Abl interactor 1 OS=Homo sapiens GN=ABI1 PE=1 SV=4	0	5.934	5	2	2	2	1	508	55	7.06	0	2
FALSE	High	Master Protein	O95232	Luc7-like protein 3 OS=Homo sapiens GN=LUC7L3 PE=1 SV=2	0	5.93	3	1	2	1	1	432	51.4	9.79	1.68	1
FALSE	High	Master Protein	O75947	ATP synthase subunit d, mitochondrial OS=Homo sapiens GN=ATP5H PE=1 SV=3	0	5.929	19	2	3	2	1	161	18.5	5.3	0	2
FALSE	High	Master Protein	P30084	Enoyl-CoA hydratase, mitochondrial OS=Homo sapiens GN=ECHS1 PE=1 SV=4	0	5.926	7	1	2	1	1	290	31.4	8.07	2.12	1
FALSE	High	Master Protein	P21127	Cyclin-dependent kinase 11B OS=Homo sapiens GN=CDK11B PE=1 SV=3	0	5.904	2	2	2	2	1	795	92.7	5.57	0	2
FALSE	High	Master Protein	Q96B97	SH3 domain-containing kinase-binding protein 1 OS=Homo sapiens GN=SH3KBP1 PE=1 SV=2	0	5.898	5	2	2	2	1	665	73.1	6.62	0	2
FALSE	High	Master Protein	Q9GZP4	PITH domain-containing protein 1 OS=Homo sapiens GN=PITHD1 PE=1 SV=1	0	5.874	9	2	2	2	1	211	24.2	5.74	1.61	2
FALSE	High	Master Protein	Q9NXV6	CDKN2A-interacting protein OS=Homo sapiens GN=CDKN2AIP PE=1 SV=3	0	5.873	4	2	2	2	1	580	61.1	9.01	0	2
FALSE	High	Master Protein	Q96F07	Cytoplasmic FMR1-interacting protein 2 OS=Homo sapiens GN=CYFIP2 PE=1 SV=2	0	5.864	3	3	3	2	1	1278	148.3	7.31	0	3
FALSE	High	Master Protein	Q9BQA1	Methylosome protein 50 OS=Homo sapiens GN=WDR77 PE=1 SV=1	0	5.849	9	2	2	2	1	342	36.7	5.17	2.1	2
FALSE	High	Master Protein	Q08554	Desmocollin-1 OS=Homo sapiens GN=DSC1 PE=1 SV=2	0	5.839	3	2	2	2	1	894	99.9	5.43	0	2
FALSE	High	Master Protein	Q9UKG1	DCC-interacting protein 13-alpha OS=Homo sapiens GN=APPL1 PE=1 SV=1	0	5.826	3	2	2	2	1	709	79.6	5.41	0	2
FALSE	High	Master Protein	O76003	Glutaredoxin-3 OS=Homo sapiens GN=GLRX3 PE=1 SV=2	0	5.804	10	3	3	3	1	335	37.4	5.39	1.76	3
FALSE	High	Master Protein	P52732	Kinesin-like protein KIF11 OS=Homo sapiens GN=KIF11 PE=1 SV=2	0	5.796	2	2	2	2	1	1056	119.1	5.64	1.81	2
FALSE	High	Master Protein	P35219	Carbonic anhydrase-related protein OS=Homo sapiens GN=CA8 PE=1 SV=3	0	5.789	12	2	2	2	1	290	33	4.86	0	2
FALSE	High	Master Protein	Q29RF7	Sister chromatid cohesion protein PDS5 homolog A OS=Homo sapiens GN=PDS5A PE=1 SV=1	0	5.775	3	2	2	2	1	1337	150.7	7.91	0	2
FALSE	High	Master Protein	Q93009	Ubiquitin carboxyl-terminal hydrolase 7 OS=Homo sapiens GN=USP7 PE=1 SV=2	0	5.775	4	3	3	3	1	1102	128.2	5.55	0	3
FALSE	High	Master Protein	Q9NUB1	Acetyl-coenzyme A synthetase 2-like, mitochondrial OS=Homo sapiens GN=ACSS1 PE=1 SV=2	0	5.767	4	2	2	2	1	689	74.8	7.11	1.86	2
FALSE	High	Master Protein	Q99848	Probable rRNA-processing protein EBP2 OS=Homo sapiens GN=EBNA1BP2 PE=1 SV=2	0	5.763	9	2	2	2	1	306	34.8	10.1	1.97	2
FALSE	High	Master Protein	P46060	Ran GTPase-activating protein 1 OS=Homo sapiens GN=RANGAP1 PE=1 SV=1	0	5.73	4	2	2	2	1	587	63.5	4.68	1.86	2
FALSE	High	Master Protein	Q9NZ08	Endoplasmic reticulum aminopeptidase 1 OS=Homo sapiens GN=ERAP1 PE=1 SV=3	0	5.705	3	2	2	2	1	941	107.2	6.46	2.39	2
FALSE	High	Master Protein	Q86U90	YrdC domain-containing protein, mitochondrial OS=Homo sapiens GN=YRDC PE=1 SV=1	0	5.691	13	2	2	2	1	279	29.3	8.57	2.02	2
FALSE	High	Master Protein	P07947	Tyrosine-protein kinase Yes OS=Homo sapiens GN=YES1 PE=1 SV=3	0	5.684	4	2	3	1	1	543	60.8	6.74	3.33	2
FALSE	High	Master Protein	Q9NR45	Sialic acid synthase OS=Homo sapiens GN=NANS PE=1 SV=2	0	5.675	9	2	2	2	1	359	40.3	6.74	0	2
FALSE	High	Master Protein	Q92614	Unconventional myosin-XVIIIa OS=Homo sapiens GN=MYO18A PE=1 SV=3	0	5.671	2	2	2	2	1	2054	233	6.3	0	2
FALSE	High	Master Protein	O96008	Mitochondrial import receptor subunit TOM40 homolog OS=Homo sapiens GN=TOMM40 PE=1 SV=1	0	5.665	13	2	2	2	1	361	37.9	7.25	2.04	2
FALSE	High	Master Protein	O75494	Serine/arginine-rich splicing factor 10 OS=Homo sapiens GN=SRSF10 PE=1 SV=1	0	5.649	15	3	4	3	1	262	31.3	11.27	0	3
FALSE	High	Master Protein	Q14739	Lamin-B receptor OS=Homo sapiens GN=LBR PE=1 SV=2	0	5.606	4	2	4	2	1	615	70.7	9.36	0	2
FALSE	High	Master Protein	Q16539	Mitogen-activated protein kinase 14 OS=Homo sapiens GN=MAPK14 PE=1 SV=3	0	5.603	7	2	2	2	1	360	41.3	5.78	0	2
FALSE	High	Master Protein	Q9H4A6	Golgi phosphoprotein 3 OS=Homo sapiens GN=GOLPH3 PE=1 SV=1	0	5.597	9	2	2	2	1	298	33.8	6.44	1.81	2
FALSE	High	Master Protein	Q7Z794	Keratin, type II cytoskeletal 1b OS=Homo sapiens GN=KRT77 PE=2 SV=3	0	5.585	4	2	4	1	1	578	61.9	5.99	4.74	2
FALSE	High	Master Protein	Q9Y294	Histone chaperone ASF1A OS=Homo sapiens GN=ASF1A PE=1 SV=1	0	5.584	26	2	3	2	1	204	23	4.41	0	2
FALSE	High	Master Protein	Q9BRJ6	Uncharacterized protein C7orf50 OS=Homo sapiens GN=C7orf50 PE=1 SV=1	0	5.574	19	2	2	2	1	194	22.1	9.64	0	2
FALSE	High	Master Protein	Q16763	Ubiquitin-conjugating enzyme E2 S OS=Homo sapiens GN=UBE2S PE=1 SV=2	0	5.549	26	3	3	3	1	222	23.8	8.38	0	3
FALSE	High	Master Protein	P50416	Carnitine O-palmitoyltransferase 1, liver isoform OS=Homo sapiens GN=CPT1A PE=1 SV=2	0	5.548	3	2	2	2	1	773	88.3	8.65	0	2
FALSE	High	Master Protein	Q709C8	Vacuolar protein sorting-associated protein 13C OS=Homo sapiens GN=VPS13C PE=1 SV=1	0	5.537	1	2	2	2	1	3753	422.1	6.83	0	2
FALSE	High	Master Protein	Q8NHV1	GTPase IMAP family member 7 OS=Homo sapiens GN=GIMAP7 PE=1 SV=1	0	5.529	10	2	2	2	1	300	34.5	6.46	0	2
FALSE	High	Master Protein	Q9H307	Pinin OS=Homo sapiens GN=PNN PE=1 SV=4	0	5.519	4	2	2	2	1	717	81.6	7.14	0	2
FALSE	High	Master Protein	P49721	Proteasome subunit beta type-2 OS=Homo sapiens GN=PSMB2 PE=1 SV=1	0	5.508	14	2	3	2	1	201	22.8	7.02	4.85	2
FALSE	High	Master Protein	Q9BZZ5	Apoptosis inhibitor 5 OS=Homo sapiens GN=API5 PE=1 SV=3	0	5.498	5	2	2	2	1	524	59	7.34	0	2
FALSE	High	Master Protein	Q92734	Protein TFG OS=Homo sapiens GN=TFG PE=1 SV=2	0	5.478	10	2	3	2	1	400	43.4	5.1	2.2	2
FALSE	High	Master Protein	P20340	Ras-related protein Rab-6A OS=Homo sapiens GN=RAB6A PE=1 SV=3	0	5.476	11	2	2	1	1	208	23.6	5.54	1.96	2
FALSE	High	Master Protein	Q9Y570	Protein phosphatase methylesterase 1 OS=Homo sapiens GN=PPME1 PE=1 SV=3	0	5.473	10	2	2	2	1	386	42.3	5.97	0	2
FALSE	High	Master Protein	Q6DD88	Atlastin-3 OS=Homo sapiens GN=ATL3 PE=1 SV=1	0	5.468	4	1	1	1	1	541	60.5	5.66	2.32	1
FALSE	High	Master Protein	Q9GZZ1	N-alpha-acetyltransferase 50 OS=Homo sapiens GN=NAA50 PE=1 SV=1	0	5.468	9	1	1	1	1	169	19.4	8.81	1.79	1
FALSE	High	Master Protein	P04216	Thy-1 membrane glycoprotein OS=Homo sapiens GN=THY1 PE=1 SV=2	0	5.466	9	1	3	1	1	161	17.9	8.73	1.98	1
FALSE	High	Master Protein	P53602	Diphosphomevalonate decarboxylase OS=Homo sapiens GN=MVD PE=1 SV=1	0	5.46	6	2	2	2	1	400	43.4	7.23	1.71	2
FALSE	High	Master Protein	Q15021	Condensin complex subunit 1 OS=Homo sapiens GN=NCAPD2 PE=1 SV=3	0	5.459	2	2	2	2	1	1401	157.1	6.61	0	2
FALSE	High	Master Protein	Q9BUT1	3-hydroxybutyrate dehydrogenase type 2 OS=Homo sapiens GN=BDH2 PE=1 SV=2	0	5.453	10	2	2	2	1	245	26.7	7.65	2.13	2
FALSE	High	Master Protein	Q9UBT2	SUMO-activating enzyme subunit 2 OS=Homo sapiens GN=UBA2 PE=1 SV=2	0	5.45	8	3	3	3	1	640	71.2	5.29	0	3
FALSE	High	Master Protein	Q9UHV9	Prefoldin subunit 2 OS=Homo sapiens GN=PFDN2 PE=1 SV=1	0	5.447	9	1	1	1	1	154	16.6	6.58	3.17	1
FALSE	High	Master Protein	P15498	Proto-oncogene vav OS=Homo sapiens GN=VAV1 PE=1 SV=4	0	5.43	3	2	2	2	1	845	98.3	6.62	1.65	2
FALSE	High	Master Protein	Q9Y508	E3 ubiquitin-protein ligase RNF114 OS=Homo sapiens GN=RNF114 PE=1 SV=1	0	5.426	9	1	1	1	1	228	25.7	7.25	2.44	1
FALSE	High	Master Protein	Q8TBB5	Kelch domain-containing protein 4 OS=Homo sapiens GN=KLHDC4 PE=1 SV=1	0	5.424	5	2	2	2	1	520	57.9	5.72	0	2
FALSE	High	Master Protein	Q9BXJ9	N-alpha-acetyltransferase 15, NatA auxiliary subunit OS=Homo sapiens GN=NAA15 PE=1 SV=1	0	5.404	2	2	2	2	1	866	101.2	7.42	1.71	2
FALSE	High	Master Protein	Q9NWY4	Histone PARylation factor 1 OS=Homo sapiens GN=HPF1 PE=1 SV=2	0	5.402	7	2	2	2	1	346	39.4	6.8	0	2
FALSE	High	Master Protein	P22061	Protein-L-isoaspartate(D-aspartate) O-methyltransferase OS=Homo sapiens GN=PCMT1 PE=1 SV=4	0	5.393	7	1	1	1	1	227	24.6	7.21	2.72	1
FALSE	High	Master Protein	Q15154	Pericentriolar material 1 protein OS=Homo sapiens GN=PCM1 PE=1 SV=4	0	5.381	1	2	2	2	1	2024	228.4	5.02	0	2
FALSE	High	Master Protein	Q8WU90	Zinc finger CCCH domain-containing protein 15 OS=Homo sapiens GN=ZC3H15 PE=1 SV=1	0	5.372	3	1	1	1	1	426	48.6	5.31	2.68	1
FALSE	High	Master Protein	Q9BT09	Protein canopy homolog 3 OS=Homo sapiens GN=CNPY3 PE=1 SV=1	0	5.366	11	2	2	2	1	278	30.7	5.49	2.2	2
FALSE	High	Master Protein	P52888	Thimet oligopeptidase OS=Homo sapiens GN=THOP1 PE=1 SV=2	0	5.364	5	2	2	2	1	689	78.8	6.05	0	2
FALSE	High	Master Protein	Q15370	Elongin-B OS=Homo sapiens GN=ELOB PE=1 SV=1	0	5.361	31	2	2	2	1	118	13.1	4.88	0	2
FALSE	High	Master Protein	P51665	26S proteasome non-ATPase regulatory subunit 7 OS=Homo sapiens GN=PSMD7 PE=1 SV=2	0	5.358	7	1	2	1	1	324	37	6.77	5.6	1
FALSE	High	Master Protein	Q9NVP1	ATP-dependent RNA helicase DDX18 OS=Homo sapiens GN=DDX18 PE=1 SV=2	0	5.34	6	2	2	2	1	670	75.4	9.5	1.72	2
FALSE	High	Master Protein	Q8N5K1	CDGSH iron-sulfur domain-containing protein 2 OS=Homo sapiens GN=CISD2 PE=1 SV=1	0	5.334	10	1	1	1	1	135	15.3	9.61	3.89	1
FALSE	High	Master Protein	P23193	Transcription elongation factor A protein 1 OS=Homo sapiens GN=TCEA1 PE=1 SV=2	0	5.331	7	2	3	2	1	301	33.9	8.38	0	2
FALSE	High	Master Protein	P13073	Cytochrome c oxidase subunit 4 isoform 1, mitochondrial OS=Homo sapiens GN=COX4I1 PE=1 SV=1	0	5.319	12	2	2	2	1	169	19.6	9.51	1.64	2
FALSE	High	Master Protein	Q5T1J5	Putative coiled-coil-helix-coiled-coil-helix domain-containing protein CHCHD2P9, mitochondrial OS=Homo sapiens GN=CHCHD2P9 PE=5 SV=1	0	5.307	19	1	2	1	1	151	15.5	9.89	3.12	1
FALSE	High	Master Protein	Q13619	Cullin-4A OS=Homo sapiens GN=CUL4A PE=1 SV=3	0	5.303	2	1	1	1	1	759	87.6	8.13	2.75	1
FALSE	High	Master Protein	Q5BKZ1	DBIRD complex subunit ZNF326 OS=Homo sapiens GN=ZNF326 PE=1 SV=2	0	5.301	4	2	2	2	1	582	65.6	5.15	1.81	2
FALSE	High	Master Protein	P62861	40S ribosomal protein S30 OS=Homo sapiens GN=FAU PE=1 SV=1	0	5.272	19	2	3	2	1	59	6.6	12.15	5.82	2
FALSE	High	Master Protein	Q9H299	SH3 domain-binding glutamic acid-rich-like protein 3 OS=Homo sapiens GN=SH3BGRL3 PE=1 SV=1	0	5.271	20	1	1	1	1	93	10.4	4.93	2.42	1
FALSE	High	Master Protein	Q9Y320	Thioredoxin-related transmembrane protein 2 OS=Homo sapiens GN=TMX2 PE=1 SV=1	0	5.258	11	2	2	2	1	296	34	8.69	0	2
FALSE	High	Master Protein	O60869	Endothelial differentiation-related factor 1 OS=Homo sapiens GN=EDF1 PE=1 SV=1	0	5.251	10	1	3	1	1	148	16.4	9.95	0	1
FALSE	High	Master Protein	Q15185	Prostaglandin E synthase 3 OS=Homo sapiens GN=PTGES3 PE=1 SV=1	0	5.245	19	2	3	2	1	160	18.7	4.54	2.35	2
FALSE	High	Master Protein	Q14166	Tubulin--tyrosine ligase-like protein 12 OS=Homo sapiens GN=TTLL12 PE=1 SV=2	0	5.242	7	3	3	3	1	644	74.4	5.53	0	3
FALSE	High	Master Protein	P17480	Nucleolar transcription factor 1 OS=Homo sapiens GN=UBTF PE=1 SV=1	0	5.237	2	2	2	2	1	764	89.4	5.81	2.48	2
FALSE	High	Master Protein	P62266	40S ribosomal protein S23 OS=Homo sapiens GN=RPS23 PE=1 SV=3	0	5.236	19	1	2	1	1	143	15.8	10.49	2.64	1
FALSE	High	Master Protein	Q15435	Protein phosphatase 1 regulatory subunit 7 OS=Homo sapiens GN=PPP1R7 PE=1 SV=1	0	5.22	5	2	2	2	1	360	41.5	4.91	2.01	2
FALSE	High	Master Protein	Q07960	Rho GTPase-activating protein 1 OS=Homo sapiens GN=ARHGAP1 PE=1 SV=1	0	5.219	6	2	2	2	1	439	50.4	6.29	0	2
FALSE	High	Master Protein	P32942	Intercellular adhesion molecule 3 OS=Homo sapiens GN=ICAM3 PE=1 SV=2	0	5.197	6	2	2	2	1	547	59.5	5.43	0	2
FALSE	High	Master Protein	Q86TU7	Histone-lysine N-methyltransferase setd3 OS=Homo sapiens GN=SETD3 PE=1 SV=1	0	5.181	5	2	2	2	1	594	67.2	5.96	0	2
FALSE	High	Master Protein	Q8IWZ3	Ankyrin repeat and KH domain-containing protein 1 OS=Homo sapiens GN=ANKHD1 PE=1 SV=1	0	5.175	1	2	2	1	1	2542	269.3	5.73	0	2
FALSE	High	Master Protein	Q9NW82	WD repeat-containing protein 70 OS=Homo sapiens GN=WDR70 PE=1 SV=1	0	5.159	4	2	2	2	1	654	73.2	6.33	0	2
FALSE	High	Master Protein	Q9Y5K6	CD2-associated protein OS=Homo sapiens GN=CD2AP PE=1 SV=1	0	5.158	4	2	2	2	1	639	71.4	6.4	1.94	2
FALSE	High	Master Protein	Q9H9T3	Elongator complex protein 3 OS=Homo sapiens GN=ELP3 PE=1 SV=2	0	5.155	4	2	2	2	1	547	62.2	8.88	0	2
FALSE	High	Master Protein	Q9GZU8	Protein FAM192A OS=Homo sapiens GN=FAM192A PE=1 SV=1	0	5.136	6	1	1	1	1	254	28.9	5.45	2.35	1
FALSE	High	Master Protein	Q14974	Importin subunit beta-1 OS=Homo sapiens GN=KPNB1 PE=1 SV=2	0	5.128	2	1	2	1	1	876	97.1	4.78	4.23	1
FALSE	High	Master Protein	Q9ULW0	Targeting protein for Xklp2 OS=Homo sapiens GN=TPX2 PE=1 SV=2	0	5.124	5	3	3	3	1	747	85.6	9.23	0	3
FALSE	High	Master Protein	Q92785	Zinc finger protein ubi-d4 OS=Homo sapiens GN=DPF2 PE=1 SV=2	0	5.11	9	2	2	2	1	391	44.1	6.33	0	2
FALSE	High	Master Protein	Q92890	Ubiquitin fusion degradation protein 1 homolog OS=Homo sapiens GN=UFD1L PE=1 SV=3	0	5.092	9	2	2	2	1	307	34.5	6.7	0	2
FALSE	High	Master Protein	Q9Y605	MORF4 family-associated protein 1 OS=Homo sapiens GN=MRFAP1 PE=1 SV=1	0	5.087	19	1	1	1	1	127	14.6	4.7	3.15	1
FALSE	High	Master Protein	Q96ME7	Zinc finger protein 512 OS=Homo sapiens GN=ZNF512 PE=1 SV=2	0	5.082	7	2	2	2	1	567	64.6	9.76	0	2
FALSE	High	Master Protein	P55145	Mesencephalic astrocyte-derived neurotrophic factor OS=Homo sapiens GN=MANF PE=1 SV=3	0	5.081	8	1	1	1	1	182	20.7	8.69	1.92	1
FALSE	High	Master Protein	Q13085	Acetyl-CoA carboxylase 1 OS=Homo sapiens GN=ACACA PE=1 SV=2	0	5.066	2	3	3	3	1	2346	265.4	6.37	0	3
FALSE	High	Master Protein	P12081	Histidine--tRNA ligase, cytoplasmic OS=Homo sapiens GN=HARS PE=1 SV=2	0.001	5.016	4	2	3	2	1	509	57.4	5.88	1.9	2
FALSE	High	Master Protein	O14602	Eukaryotic translation initiation factor 1A, Y-chromosomal OS=Homo sapiens GN=EIF1AY PE=1 SV=4	0.001	4.996	32	2	2	2	1	144	16.4	5.24	2.21	2
FALSE	High	Master Protein	Q8TC12	Retinol dehydrogenase 11 OS=Homo sapiens GN=RDH11 PE=1 SV=2	0.001	4.987	4	1	1	1	1	318	35.4	8.82	2.24	1
FALSE	High	Master Protein	Q9BY43	Charged multivesicular body protein 4a OS=Homo sapiens GN=CHMP4A PE=1 SV=3	0.001	4.966	6	1	1	1	1	222	25.1	4.7	2.24	1
FALSE	High	Master Protein	P62328	Thymosin beta-4 OS=Homo sapiens GN=TMSB4X PE=1 SV=2	0.001	4.964	55	2	2	2	1	44	5.1	5.06	2.36	2
FALSE	High	Master Protein	Q9GZL7	Ribosome biogenesis protein WDR12 OS=Homo sapiens GN=WDR12 PE=1 SV=2	0.001	4.961	8	2	2	2	1	423	47.7	5.9	1.95	2
FALSE	High	Master Protein	O43148	mRNA cap guanine-N7 methyltransferase OS=Homo sapiens GN=RNMT PE=1 SV=1	0.001	4.923	6	2	2	2	1	476	54.8	6.61	0	2
FALSE	High	Master Protein	P35236	Tyrosine-protein phosphatase non-receptor type 7 OS=Homo sapiens GN=PTPN7 PE=1 SV=3	0.001	4.923	4	1	1	1	1	360	40.5	6.79	2.01	1
FALSE	High	Master Protein	Q32MZ4	Leucine-rich repeat flightless-interacting protein 1 OS=Homo sapiens GN=LRRFIP1 PE=1 SV=2	0.001	4.918	4	2	2	2	1	808	89.2	4.65	0	2
FALSE	High	Master Protein	P49589	Cysteine--tRNA ligase, cytoplasmic OS=Homo sapiens GN=CARS PE=1 SV=3	0.001	4.917	2	1	1	1	1	748	85.4	6.76	1.68	1
FALSE	High	Master Protein	P62269	40S ribosomal protein S18 OS=Homo sapiens GN=RPS18 PE=1 SV=3	0.001	4.888	14	2	4	2	1	152	17.7	10.99	1.92	2
FALSE	High	Master Protein	Q9NZB2	Constitutive coactivator of PPAR-gamma-like protein 1 OS=Homo sapiens GN=FAM120A PE=1 SV=2	0.001	4.882	2	2	2	2	1	1118	121.8	8.88	1.64	2
FALSE	High	Master Protein	P48637	Glutathione synthetase OS=Homo sapiens GN=GSS PE=1 SV=1	0.001	4.87	7	2	2	2	1	474	52.4	5.92	1.73	2
FALSE	High	Master Protein	O43660	Pleiotropic regulator 1 OS=Homo sapiens GN=PLRG1 PE=1 SV=1	0.001	4.848	5	1	1	1	1	514	57.2	9.17	3.52	1
FALSE	High	Master Protein	Q96A72	Protein mago nashi homolog 2 OS=Homo sapiens GN=MAGOHB PE=1 SV=1	0.001	4.843	14	1	3	1	1	148	17.3	6.39	5.22	1
FALSE	High	Master Protein	Q99623	Prohibitin-2 OS=Homo sapiens GN=PHB2 PE=1 SV=2	0.001	4.827	6	1	2	1	1	299	33.3	9.83	2.09	1
FALSE	High	Master Protein	Q06323	Proteasome activator complex subunit 1 OS=Homo sapiens GN=PSME1 PE=1 SV=1	0.001	4.821	10	2	4	2	1	249	28.7	6.02	5.28	2
FALSE	High	Master Protein	P61513	60S ribosomal protein L37a OS=Homo sapiens GN=RPL37A PE=1 SV=2	0.001	4.812	20	1	2	1	1	92	10.3	10.43	3.7	1
FALSE	High	Master Protein	P36957	Dihydrolipoyllysine-residue succinyltransferase component of 2-oxoglutarate dehydrogenase complex, mitochondrial OS=Homo sapiens GN=DLST PE=1 SV=4	0.001	4.812	3	1	1	1	1	453	48.7	8.95	2.17	1
FALSE	High	Master Protein	Q13595	Transformer-2 protein homolog alpha OS=Homo sapiens GN=TRA2A PE=1 SV=1	0.001	4.804	5	1	1	1	1	282	32.7	11.27	2.29	1
FALSE	High	Master Protein	Q14690	Protein RRP5 homolog OS=Homo sapiens GN=PDCD11 PE=1 SV=3	0.001	4.785	2	2	2	2	1	1871	208.6	8.87	0	2
FALSE	High	Master Protein	Q9NWV4	UPF0587 protein C1orf123 OS=Homo sapiens GN=C1orf123 PE=1 SV=1	0.001	4.77	14	1	1	1	1	160	18	5.01	2.79	1
FALSE	High	Master Protein	Q9Y2Z0	Protein SGT1 homolog OS=Homo sapiens GN=SUGT1 PE=1 SV=3	0.001	4.758	9	2	2	2	1	365	41	5.16	1.87	2
FALSE	High	Master Protein	P62899	60S ribosomal protein L31 OS=Homo sapiens GN=RPL31 PE=1 SV=1	0.001	4.754	11	1	1	1	1	125	14.5	10.54	2.79	1
FALSE	High	Master Protein	Q9C0B1	Alpha-ketoglutarate-dependent dioxygenase FTO OS=Homo sapiens GN=FTO PE=1 SV=3	0.001	4.75	3	1	1	1	1	505	58.2	5.22	1.79	1
FALSE	High	Master Protein	P54819	Adenylate kinase 2, mitochondrial OS=Homo sapiens GN=AK2 PE=1 SV=2	0.001	4.742	9	2	4	2	1	239	26.5	7.81	1.81	2
FALSE	High	Master Protein	Q8NFH4	Nucleoporin Nup37 OS=Homo sapiens GN=NUP37 PE=1 SV=1	0.001	4.739	7	2	2	2	1	326	36.7	5.92	0	2
FALSE	High	Master Protein	Q8N7H5	RNA polymerase II-associated factor 1 homolog OS=Homo sapiens GN=PAF1 PE=1 SV=2	0.001	4.736	10	3	3	3	1	531	59.9	4.63	0	3
FALSE	High	Master Protein	Q9Y4K1	Absent in melanoma 1 protein OS=Homo sapiens GN=AIM1 PE=1 SV=3	0.001	4.736	2	2	2	2	1	1723	188.6	5.86	1.67	2
FALSE	High	Master Protein	O00743	Serine/threonine-protein phosphatase 6 catalytic subunit OS=Homo sapiens GN=PPP6C PE=1 SV=1	0.001	4.726	5	1	1	1	1	305	35.1	5.69	2.5	1
FALSE	High	Master Protein	Q9HB07	UPF0160 protein MYG1, mitochondrial OS=Homo sapiens GN=C12orf10 PE=1 SV=2	0.001	4.721	5	2	2	2	1	376	42.4	6.67	3.92	2
FALSE	High	Master Protein	P11216	Glycogen phosphorylase, brain form OS=Homo sapiens GN=PYGB PE=1 SV=5	0.001	4.717	4	2	2	2	1	843	96.6	6.86	0	2
FALSE	High	Master Protein	P55854	Small ubiquitin-related modifier 3 OS=Homo sapiens GN=SUMO3 PE=1 SV=2	0.001	4.697	12	1	2	1	1	103	11.6	5.49	5.89	1
FALSE	High	Master Protein	Q9NX24	H/ACA ribonucleoprotein complex subunit 2 OS=Homo sapiens GN=NHP2 PE=1 SV=1	0.001	4.694	19	2	3	2	1	153	17.2	8.22	0	2
FALSE	High	Master Protein	P22059	Oxysterol-binding protein 1 OS=Homo sapiens GN=OSBP PE=1 SV=1	0.001	4.69	2	1	1	1	1	807	89.4	7.3	2.65	1
FALSE	High	Master Protein	P27824	Calnexin OS=Homo sapiens GN=CANX PE=1 SV=2	0.001	4.686	6	2	4	2	1	592	67.5	4.6	0	2
FALSE	High	Master Protein	Q8N766	ER membrane protein complex subunit 1 OS=Homo sapiens GN=EMC1 PE=1 SV=1	0.001	4.683	1	1	1	1	1	993	111.7	7.66	2.19	1
FALSE	High	Master Protein	Q9NRZ9	Lymphoid-specific helicase OS=Homo sapiens GN=HELLS PE=1 SV=1	0.001	4.678	4	2	2	2	1	838	97	7.93	0	2
FALSE	High	Master Protein	Q9UIA9	Exportin-7 OS=Homo sapiens GN=XPO7 PE=1 SV=3	0.001	4.661	1	1	1	1	1	1087	123.8	6.32	2.05	1
FALSE	High	Master Protein	P24941	Cyclin-dependent kinase 2 OS=Homo sapiens GN=CDK2 PE=1 SV=2	0.001	4.643	8	2	3	1	1	298	33.9	8.68	3.33	2
FALSE	High	Master Protein	Q13155	Aminoacyl tRNA synthase complex-interacting multifunctional protein 2 OS=Homo sapiens GN=AIMP2 PE=1 SV=2	0.001	4.632	8	1	2	1	1	320	35.3	8.22	2.58	1
FALSE	High	Master Protein	Q7L576	Cytoplasmic FMR1-interacting protein 1 OS=Homo sapiens GN=CYFIP1 PE=1 SV=1	0.001	4.631	2	2	2	1	1	1253	145.1	6.9	0	2
FALSE	High	Master Protein	Q2NL82	Pre-rRNA-processing protein TSR1 homolog OS=Homo sapiens GN=TSR1 PE=1 SV=1	0.001	4.629	2	1	1	1	1	804	91.8	7.42	1.9	1
FALSE	High	Master Protein	P13598	Intercellular adhesion molecule 2 OS=Homo sapiens GN=ICAM2 PE=1 SV=2	0.001	4.629	5	1	1	1	1	275	30.6	7.43	2.86	1
FALSE	High	Master Protein	O75475	PC4 and SFRS1-interacting protein OS=Homo sapiens GN=PSIP1 PE=1 SV=1	0.001	4.624	3	1	1	1	1	530	60.1	9.13	2.98	1
FALSE	High	Master Protein	Q00577	Transcriptional activator protein Pur-alpha OS=Homo sapiens GN=PURA PE=1 SV=2	0.001	4.614	8	1	1	1	1	322	34.9	6.44	2.16	1
FALSE	High	Master Protein	O60488	Long-chain-fatty-acid--CoA ligase 4 OS=Homo sapiens GN=ACSL4 PE=1 SV=2	0.001	4.607	5	2	2	1	1	711	79.1	8.38	0	2
FALSE	High	Master Protein	P49840	Glycogen synthase kinase-3 alpha OS=Homo sapiens GN=GSK3A PE=1 SV=2	0.001	4.6	6	2	2	2	1	483	50.9	8.75	2.37	2
FALSE	High	Master Protein	Q92922	SWI/SNF complex subunit SMARCC1 OS=Homo sapiens GN=SMARCC1 PE=1 SV=3	0.001	4.596	4	2	2	2	1	1105	122.8	5.76	0	2
FALSE	High	Master Protein	P62750	60S ribosomal protein L23a OS=Homo sapiens GN=RPL23A PE=1 SV=1	0.001	4.595	8	1	3	1	1	156	17.7	10.45	6.78	1
FALSE	High	Master Protein	Q9UMR2	ATP-dependent RNA helicase DDX19B OS=Homo sapiens GN=DDX19B PE=1 SV=1	0.001	4.581	7	2	2	2	1	479	53.9	6.3	0	2
FALSE	High	Master Protein	Q9UIG0	Tyrosine-protein kinase BAZ1B OS=Homo sapiens GN=BAZ1B PE=1 SV=2	0.001	4.58	3	2	2	2	1	1483	170.8	8.48	0	2
FALSE	High	Master Protein	Q13330	Metastasis-associated protein MTA1 OS=Homo sapiens GN=MTA1 PE=1 SV=2	0.001	4.572	3	1	1	1	1	715	80.7	9.26	1.79	1
FALSE	High	Master Protein	Q5W0V3	Protein FAM160B1 OS=Homo sapiens GN=FAM160B1 PE=1 SV=1	0.001	4.557	5	2	2	2	1	765	86.5	5.29	0	2
FALSE	High	Master Protein	P07954	Fumarate hydratase, mitochondrial OS=Homo sapiens GN=FH PE=1 SV=3	0.001	4.547	6	2	2	2	1	510	54.6	8.76	1.93	2
FALSE	High	Master Protein	P05089	Arginase-1 OS=Homo sapiens GN=ARG1 PE=1 SV=2	0.001	4.544	7	2	2	2	1	322	34.7	7.21	0	2
FALSE	High	Master Protein	Q96CW1	AP-2 complex subunit mu OS=Homo sapiens GN=AP2M1 PE=1 SV=2	0.001	4.54	3	1	1	1	1	435	49.6	9.54	2.47	1
FALSE	High	Master Protein	Q9BXR0	Queuine tRNA-ribosyltransferase catalytic subunit 1 OS=Homo sapiens GN=QTRT1 PE=1 SV=3	0.001	4.531	7	2	2	2	1	403	44	7.23	0	2
FALSE	High	Master Protein	P41223	Protein BUD31 homolog OS=Homo sapiens GN=BUD31 PE=1 SV=2	0.001	4.515	13	2	2	2	1	144	17	8.82	0	2
FALSE	High	Master Protein	Q5SSJ5	Heterochromatin protein 1-binding protein 3 OS=Homo sapiens GN=HP1BP3 PE=1 SV=1	0.001	4.508	4	1	2	1	1	553	61.2	9.67	0	1
FALSE	High	Master Protein	Q7L2H7	Eukaryotic translation initiation factor 3 subunit M OS=Homo sapiens GN=EIF3M PE=1 SV=1	0.001	4.498	5	1	2	1	1	374	42.5	5.63	0	1
FALSE	High	Master Protein	P50897	Palmitoyl-protein thioesterase 1 OS=Homo sapiens GN=PPT1 PE=1 SV=1	0.001	4.494	5	1	2	1	1	306	34.2	6.52	2.83	1
FALSE	High	Master Protein	P48426	Phosphatidylinositol 5-phosphate 4-kinase type-2 alpha OS=Homo sapiens GN=PIP4K2A PE=1 SV=2	0.001	4.487	3	1	1	1	1	406	46.2	6.99	1.92	1
FALSE	High	Master Protein	Q9H9B4	Sideroflexin-1 OS=Homo sapiens GN=SFXN1 PE=1 SV=4	0.001	4.479	7	2	2	2	1	322	35.6	9.07	0	2
FALSE	High	Master Protein	Q96C36	Pyrroline-5-carboxylate reductase 2 OS=Homo sapiens GN=PYCR2 PE=1 SV=1	0.001	4.467	5	1	1	1	1	320	33.6	7.77	0	1
FALSE	High	Master Protein	P10155	60 kDa SS-A/Ro ribonucleoprotein OS=Homo sapiens GN=TROVE2 PE=1 SV=2	0.001	4.464	2	1	1	1	1	538	60.6	8.03	2.38	1
FALSE	High	Master Protein	O43681	ATPase ASNA1 OS=Homo sapiens GN=ASNA1 PE=1 SV=2	0.001	4.456	4	1	2	1	1	348	38.8	4.91	1.73	1
FALSE	High	Master Protein	Q10567	AP-1 complex subunit beta-1 OS=Homo sapiens GN=AP1B1 PE=1 SV=2	0.001	4.455	1	1	1	1	1	949	104.6	5.06	1.65	1
FALSE	High	Master Protein	Q6IBS0	Twinfilin-2 OS=Homo sapiens GN=TWF2 PE=1 SV=2	0.001	4.447	5	1	1	1	1	349	39.5	6.84	2.47	1
FALSE	High	Master Protein	P46379	Large proline-rich protein BAG6 OS=Homo sapiens GN=BAG6 PE=1 SV=2	0.001	4.441	1	1	1	1	1	1132	119.3	5.6	2.74	1
FALSE	High	Master Protein	P14678	Small nuclear ribonucleoprotein-associated proteins B and B' OS=Homo sapiens GN=SNRPB PE=1 SV=2	0.001	4.432	12	2	2	2	1	240	24.6	11.19	0	2
FALSE	High	Master Protein	P60981	Destrin OS=Homo sapiens GN=DSTN PE=1 SV=3	0.001	4.432	7	1	2	1	1	165	18.5	7.85	2.33	1
FALSE	High	Master Protein	Q14696	LDLR chaperone MESD OS=Homo sapiens GN=MESDC2 PE=1 SV=2	0.001	4.426	6	1	1	1	1	234	26.1	7.78	2.09	1
FALSE	High	Master Protein	P14923	Junction plakoglobin OS=Homo sapiens GN=JUP PE=1 SV=3	0.001	4.424	2	1	1	1	1	745	81.7	6.14	2.23	1
FALSE	High	Master Protein	P61313	60S ribosomal protein L15 OS=Homo sapiens GN=RPL15 PE=1 SV=2	0.001	4.423	7	1	1	1	1	204	24.1	11.62	2.44	1
FALSE	High	Master Protein	O00178	GTP-binding protein 1 OS=Homo sapiens GN=GTPBP1 PE=1 SV=3	0.001	4.408	2	1	1	1	1	669	72.4	8.34	1.64	1
FALSE	High	Master Protein	O43852	Calumenin OS=Homo sapiens GN=CALU PE=1 SV=2	0.001	4.396	9	3	3	3	1	315	37.1	4.64	0	3
FALSE	High	Master Protein	Q9BQG0	Myb-binding protein 1A OS=Homo sapiens GN=MYBBP1A PE=1 SV=2	0.001	4.391	1	2	2	2	1	1328	148.8	9.28	0	2
FALSE	High	Master Protein	Q92621	Nuclear pore complex protein Nup205 OS=Homo sapiens GN=NUP205 PE=1 SV=3	0.001	4.387	2	3	3	3	1	2012	227.8	6.19	0	3
FALSE	High	Master Protein	Q9NPD3	Exosome complex component RRP41 OS=Homo sapiens GN=EXOSC4 PE=1 SV=3	0.001	4.377	7	1	1	1	1	245	26.4	6.52	2.08	1
FALSE	High	Master Protein	Q9Y2L1	Exosome complex exonuclease RRP44 OS=Homo sapiens GN=DIS3 PE=1 SV=2	0.001	4.375	2	2	2	2	1	958	108.9	7.14	0	2
FALSE	High	Master Protein	P49005	DNA polymerase delta subunit 2 OS=Homo sapiens GN=POLD2 PE=1 SV=1	0.001	4.374	3	1	1	1	1	469	51.3	5.58	2.11	1
FALSE	High	Master Protein	O15173	Membrane-associated progesterone receptor component 2 OS=Homo sapiens GN=PGRMC2 PE=1 SV=1	0.001	4.372	9	1	1	1	1	223	23.8	4.88	2.92	1
FALSE	High	Master Protein	O00499	Myc box-dependent-interacting protein 1 OS=Homo sapiens GN=BIN1 PE=1 SV=1	0.001	4.37	6	2	2	2	1	593	64.7	5.06	0	2
FALSE	High	Master Protein	Q96C19	EF-hand domain-containing protein D2 OS=Homo sapiens GN=EFHD2 PE=1 SV=1	0.001	4.369	5	1	1	1	1	240	26.7	5.2	1.85	1
FALSE	High	Master Protein	Q9NT62	Ubiquitin-like-conjugating enzyme ATG3 OS=Homo sapiens GN=ATG3 PE=1 SV=1	0.001	4.366	4	1	1	1	1	314	35.8	4.74	2.45	1
FALSE	High	Master Protein	Q9BZE4	Nucleolar GTP-binding protein 1 OS=Homo sapiens GN=GTPBP4 PE=1 SV=3	0.001	4.365	2	1	1	1	1	634	73.9	9.5	2.72	1
FALSE	High	Master Protein	Q92995	Ubiquitin carboxyl-terminal hydrolase 13 OS=Homo sapiens GN=USP13 PE=1 SV=2	0.001	4.36	6	2	2	2	1	863	97.3	5.53	0	2
FALSE	High	Master Protein	Q8NBS9	Thioredoxin domain-containing protein 5 OS=Homo sapiens GN=TXNDC5 PE=1 SV=2	0.001	4.337	6	2	2	2	1	432	47.6	5.97	0	2
FALSE	High	Master Protein	Q9Y3E5	Peptidyl-tRNA hydrolase 2, mitochondrial OS=Homo sapiens GN=PTRH2 PE=1 SV=1	0.001	4.337	11	1	1	1	1	179	19.2	8.73	2.26	1
FALSE	High	Master Protein	P62854	40S ribosomal protein S26 OS=Homo sapiens GN=RPS26 PE=1 SV=3	0.001	4.335	13	1	2	1	1	115	13	11	2.44	1
FALSE	High	Master Protein	O60880	SH2 domain-containing protein 1A OS=Homo sapiens GN=SH2D1A PE=1 SV=1	0.001	4.335	11	1	1	1	1	128	14.2	8.56	2.33	1
FALSE	High	Master Protein	Q92917	G patch domain and KOW motifs-containing protein OS=Homo sapiens GN=GPKOW PE=1 SV=2	0.001	4.32	8	2	2	2	1	476	52.2	6.15	0	2
FALSE	High	Master Protein	Q92882	Osteoclast-stimulating factor 1 OS=Homo sapiens GN=OSTF1 PE=1 SV=2	0.001	4.282	15	2	2	2	1	214	23.8	5.68	0	2
FALSE	High	Master Protein	Q99747	Gamma-soluble NSF attachment protein OS=Homo sapiens GN=NAPG PE=1 SV=1	0.001	4.28	14	2	2	2	1	312	34.7	5.41	0	2
FALSE	High	Master Protein	Q9Y3B4	Splicing factor 3B subunit 6 OS=Homo sapiens GN=SF3B6 PE=1 SV=1	0.001	4.268	11	1	1	1	1	125	14.6	9.38	2.79	1
FALSE	High	Master Protein	Q7L5N1	COP9 signalosome complex subunit 6 OS=Homo sapiens GN=COPS6 PE=1 SV=1	0.001	4.264	4	1	1	1	1	327	36.1	5.73	2.16	1
FALSE	High	Master Protein	P49841	Glycogen synthase kinase-3 beta OS=Homo sapiens GN=GSK3B PE=1 SV=2	0.001	4.252	10	2	2	2	1	420	46.7	8.78	0	2
FALSE	High	Master Protein	Q969H8	Myeloid-derived growth factor OS=Homo sapiens GN=MYDGF PE=1 SV=1	0.001	4.252	9	1	1	1	1	173	18.8	6.68	2.49	1
FALSE	High	Master Protein	O14974	Protein phosphatase 1 regulatory subunit 12A OS=Homo sapiens GN=PPP1R12A PE=1 SV=1	0.001	4.239	1	1	1	1	1	1030	115.2	5.4	1.8	1
FALSE	High	Master Protein	Q05519	Serine/arginine-rich splicing factor 11 OS=Homo sapiens GN=SRSF11 PE=1 SV=1	0.001	4.234	4	1	1	1	1	484	53.5	10.52	2.28	1
FALSE	High	Master Protein	Q8WU39	Marginal zone B- and B1-cell-specific protein OS=Homo sapiens GN=MZB1 PE=1 SV=1	0.001	4.234	10	1	1	1	1	189	20.7	5.57	2.07	1
FALSE	High	Master Protein	O75190	DnaJ homolog subfamily B member 6 OS=Homo sapiens GN=DNAJB6 PE=1 SV=2	0.001	4.227	4	1	1	1	1	326	36.1	9.16	2.21	1
FALSE	High	Master Protein	P29350	Tyrosine-protein phosphatase non-receptor type 6 OS=Homo sapiens GN=PTPN6 PE=1 SV=1	0.001	4.225	6	2	2	2	1	595	67.5	7.78	0	2
FALSE	High	Master Protein	Q9Y5Z4	Heme-binding protein 2 OS=Homo sapiens GN=HEBP2 PE=1 SV=1	0.001	4.219	12	2	2	2	1	205	22.9	4.63	0	2
FALSE	High	Master Protein	Q9Y6N5	Sulfide:quinone oxidoreductase, mitochondrial OS=Homo sapiens GN=SQRDL PE=1 SV=1	0.001	4.217	3	1	1	1	1	450	49.9	9.11	2.09	1
FALSE	High	Master Protein	Q8N5A5	Zinc finger CCCH-type with G patch domain-containing protein OS=Homo sapiens GN=ZGPAT PE=1 SV=3	0.001	4.212	3	1	1	1	1	531	57.3	5.43	0	1
FALSE	High	Master Protein	P29084	Transcription initiation factor IIE subunit beta OS=Homo sapiens GN=GTF2E2 PE=1 SV=1	0.001	4.21	4	1	1	1	1	291	33	9.66	2.31	1
FALSE	High	Master Protein	Q00169	Phosphatidylinositol transfer protein alpha isoform OS=Homo sapiens GN=PITPNA PE=1 SV=2	0.001	4.206	12	2	2	1	1	270	31.8	6.55	1.78	2
FALSE	High	Master Protein	O60925	Prefoldin subunit 1 OS=Homo sapiens GN=PFDN1 PE=1 SV=2	0.001	4.203	9	1	1	1	1	122	14.2	6.81	2.3	1
FALSE	High	Master Protein	O00232	26S proteasome non-ATPase regulatory subunit 12 OS=Homo sapiens GN=PSMD12 PE=1 SV=3	0.001	4.198	4	1	1	1	1	456	52.9	7.65	0	1
FALSE	High	Master Protein	O95456	Proteasome assembly chaperone 1 OS=Homo sapiens GN=PSMG1 PE=1 SV=1	0.001	4.197	5	1	1	1	1	288	32.8	7.17	2.52	1
FALSE	High	Master Protein	Q13561	Dynactin subunit 2 OS=Homo sapiens GN=DCTN2 PE=1 SV=4	0.001	4.195	4	2	2	2	1	401	44.2	5.21	2.08	2
FALSE	High	Master Protein	Q9BXY0	Protein MAK16 homolog OS=Homo sapiens GN=MAK16 PE=1 SV=2	0.001	4.193	5	1	1	1	1	300	35.3	5.38	0	1
FALSE	High	Master Protein	P55084	Trifunctional enzyme subunit beta, mitochondrial OS=Homo sapiens GN=HADHB PE=1 SV=3	0.001	4.189	3	1	1	1	1	474	51.3	9.41	2.33	1
FALSE	High	Master Protein	Q9NRP0	Oligosaccharyltransferase complex subunit OSTC OS=Homo sapiens GN=OSTC PE=1 SV=1	0.001	4.184	8	1	1	1	1	149	16.8	9.13	2.56	1
FALSE	High	Master Protein	Q15942	Zyxin OS=Homo sapiens GN=ZYX PE=1 SV=1	0.001	4.183	6	2	2	2	1	572	61.2	6.67	0	2
FALSE	High	Master Protein	Q7Z6E9	E3 ubiquitin-protein ligase RBBP6 OS=Homo sapiens GN=RBBP6 PE=1 SV=1	0.001	4.182	1	1	1	1	1	1792	201.4	9.64	1.69	1
FALSE	High	Master Protein	Q15645	Pachytene checkpoint protein 2 homolog OS=Homo sapiens GN=TRIP13 PE=1 SV=2	0.001	4.182	3	1	1	1	1	432	48.5	6.09	2.07	1
FALSE	High	Master Protein	Q9H3N1	Thioredoxin-related transmembrane protein 1 OS=Homo sapiens GN=TMX1 PE=1 SV=1	0.001	4.181	4	1	1	1	1	280	31.8	4.98	2.2	1
FALSE	High	Master Protein	O43399	Tumor protein D54 OS=Homo sapiens GN=TPD52L2 PE=1 SV=2	0.001	4.178	23	2	2	2	1	206	22.2	5.36	0	2
FALSE	High	Master Protein	Q9NZ63	Uncharacterized protein C9orf78 OS=Homo sapiens GN=C9orf78 PE=1 SV=1	0.001	4.171	5	1	1	1	1	289	33.7	6.74	2.61	1
FALSE	High	Master Protein	P04234	T-cell surface glycoprotein CD3 delta chain OS=Homo sapiens GN=CD3D PE=1 SV=1	0.001	4.168	7	1	2	1	1	171	18.9	5.54	1.67	1
FALSE	High	Master Protein	O14737	Programmed cell death protein 5 OS=Homo sapiens GN=PDCD5 PE=1 SV=3	0.001	4.158	10	1	2	1	1	125	14.3	6.04	2.62	1
FALSE	High	Master Protein	Q9H4A5	Golgi phosphoprotein 3-like OS=Homo sapiens GN=GOLPH3L PE=1 SV=1	0.001	4.156	5	1	1	1	1	285	32.7	5.83	1.71	1
FALSE	High	Master Protein	Q9UEY8	Gamma-adducin OS=Homo sapiens GN=ADD3 PE=1 SV=1	0.001	4.155	2	1	1	1	1	706	79.1	6.32	2.75	1
FALSE	High	Master Protein	P48634	Protein PRRC2A OS=Homo sapiens GN=PRRC2A PE=1 SV=3	0.001	4.15	1	1	1	1	1	2157	228.7	9.45	0	1
FALSE	High	Master Protein	Q13442	28 kDa heat- and acid-stable phosphoprotein OS=Homo sapiens GN=PDAP1 PE=1 SV=1	0.001	4.149	9	1	1	1	1	181	20.6	8.87	0	1
FALSE	High	Master Protein	Q15785	Mitochondrial import receptor subunit TOM34 OS=Homo sapiens GN=TOMM34 PE=1 SV=2	0.001	4.141	6	1	1	1	1	309	34.5	8.98	2.57	1
FALSE	High	Master Protein	Q8WWP7	GTPase IMAP family member 1 OS=Homo sapiens GN=GIMAP1 PE=1 SV=1	0.001	4.14	6	1	1	1	1	306	34.3	8.87	3.17	1
FALSE	High	Master Protein	P31483	Nucleolysin TIA-1 isoform p40 OS=Homo sapiens GN=TIA1 PE=1 SV=3	0.001	4.13	12	2	2	2	1	386	42.9	7.74	0	2
FALSE	High	Master Protein	P41732	Tetraspanin-7 OS=Homo sapiens GN=TSPAN7 PE=1 SV=2	0.001	4.127	6	1	1	1	1	249	27.6	7.2	1.94	1
FALSE	High	Master Protein	P22830	Ferrochelatase, mitochondrial OS=Homo sapiens GN=FECH PE=1 SV=2	0.001	4.119	4	1	1	1	1	423	47.8	8.73	1.91	1
FALSE	High	Master Protein	Q9H078	Caseinolytic peptidase B protein homolog OS=Homo sapiens GN=CLPB PE=1 SV=1	0.001	4.111	2	1	1	1	1	707	78.7	9.01	1.95	1
FALSE	High	Master Protein	O15269	Serine palmitoyltransferase 1 OS=Homo sapiens GN=SPTLC1 PE=1 SV=1	0.001	4.103	3	1	1	1	1	473	52.7	6.01	2.7	1
FALSE	High	Master Protein	O75934	Pre-mRNA-splicing factor SPF27 OS=Homo sapiens GN=BCAS2 PE=1 SV=1	0.001	4.089	6	1	1	1	1	225	26.1	5.66	1.85	1
FALSE	High	Master Protein	P42566	Epidermal growth factor receptor substrate 15 OS=Homo sapiens GN=EPS15 PE=1 SV=2	0.001	4.08	2	1	1	1	1	896	98.6	4.64	2.01	1
FALSE	High	Master Protein	Q9BQB6	Vitamin K epoxide reductase complex subunit 1 OS=Homo sapiens GN=VKORC1 PE=1 SV=1	0.001	4.076	8	1	1	1	1	163	18.2	9.36	1.93	1
FALSE	High	Master Protein	Q8TCS8	Polyribonucleotide nucleotidyltransferase 1, mitochondrial OS=Homo sapiens GN=PNPT1 PE=1 SV=2	0.001	4.076	3	2	2	2	1	783	85.9	7.77	0	2
FALSE	High	Master Protein	Q99615	DnaJ homolog subfamily C member 7 OS=Homo sapiens GN=DNAJC7 PE=1 SV=2	0.001	4.073	3	1	1	1	1	494	56.4	6.96	1.73	1
FALSE	High	Master Protein	P09543	2',3'-cyclic-nucleotide 3'-phosphodiesterase OS=Homo sapiens GN=CNP PE=1 SV=2	0.001	4.072	12	2	2	2	1	421	47.5	9.07	0	2
FALSE	High	Master Protein	O43633	Charged multivesicular body protein 2a OS=Homo sapiens GN=CHMP2A PE=1 SV=1	0.001	4.065	9	1	1	1	1	222	25.1	5.97	2.02	1
FALSE	High	Master Protein	Q3MHD2	Protein LSM12 homolog OS=Homo sapiens GN=LSM12 PE=1 SV=2	0.001	4.06	7	1	1	1	1	195	21.7	7.74	2.23	1
FALSE	High	Master Protein	P30566	Adenylosuccinate lyase OS=Homo sapiens GN=ADSL PE=1 SV=2	0.001	4.059	5	2	2	2	1	484	54.9	7.11	0	2
FALSE	High	Master Protein	P30040	Endoplasmic reticulum resident protein 29 OS=Homo sapiens GN=ERP29 PE=1 SV=4	0.001	4.044	5	1	1	1	1	261	29	7.31	1.79	1
FALSE	High	Master Protein	Q9UBQ7	Glyoxylate reductase/hydroxypyruvate reductase OS=Homo sapiens GN=GRHPR PE=1 SV=1	0.001	4.037	7	1	1	1	1	328	35.6	7.39	2.01	1
FALSE	High	Master Protein	P60953	Cell division control protein 42 homolog OS=Homo sapiens GN=CDC42 PE=1 SV=2	0.001	4.037	11	1	2	1	1	191	21.2	6.55	2.94	1
FALSE	High	Master Protein	O75530	Polycomb protein EED OS=Homo sapiens GN=EED PE=1 SV=2	0.001	4.03	3	1	1	1	1	441	50.2	7.03	2.05	1
FALSE	High	Master Protein	P56211	cAMP-regulated phosphoprotein 19 OS=Homo sapiens GN=ARPP19 PE=1 SV=2	0.001	4.028	33	2	2	2	1	112	12.3	9.09	0	2
FALSE	High	Master Protein	Q9UHA3	Probable ribosome biogenesis protein RLP24 OS=Homo sapiens GN=RSL24D1 PE=1 SV=1	0.001	4.027	7	1	1	1	1	163	19.6	9.98	2.04	1
FALSE	High	Master Protein	P55160	Nck-associated protein 1-like OS=Homo sapiens GN=NCKAP1L PE=1 SV=3	0.001	4.023	1	1	1	1	1	1127	128.1	6.86	0	1
FALSE	High	Master Protein	Q9Y3Y2	Chromatin target of PRMT1 protein OS=Homo sapiens GN=CHTOP PE=1 SV=2	0.001	4.017	5	1	1	1	1	248	26.4	12.23	1.84	1
FALSE	High	Master Protein	O43709	Probable 18S rRNA (guanine-N(7))-methyltransferase OS=Homo sapiens GN=WBSCR22 PE=1 SV=2	0.001	4.013	8	1	1	1	1	281	31.9	8.73	0	1
FALSE	High	Master Protein	Q8N4V1	Membrane magnesium transporter 1 OS=Homo sapiens GN=MMGT1 PE=1 SV=1	0.001	3.994	18	1	1	1	1	131	14.7	9.16	0	1
FALSE	High	Master Protein	Q9H4G4	Golgi-associated plant pathogenesis-related protein 1 OS=Homo sapiens GN=GLIPR2 PE=1 SV=3	0.001	3.981	8	1	1	1	1	154	17.2	9.41	2.24	1
FALSE	High	Master Protein	Q9H0E2	Toll-interacting protein OS=Homo sapiens GN=TOLLIP PE=1 SV=1	0.001	3.977	5	1	1	1	1	274	30.3	5.97	2.42	1
FALSE	High	Master Protein	Q9NS69	Mitochondrial import receptor subunit TOM22 homolog OS=Homo sapiens GN=TOMM22 PE=1 SV=3	0.001	3.976	18	1	1	1	1	142	15.5	4.34	0	1
FALSE	High	Master Protein	Q96C86	m7GpppX diphosphatase OS=Homo sapiens GN=DCPS PE=1 SV=2	0.001	3.96	6	1	1	1	1	337	38.6	6.38	0	1
FALSE	High	Master Protein	Q16186	Proteasomal ubiquitin receptor ADRM1 OS=Homo sapiens GN=ADRM1 PE=1 SV=2	0.001	3.958	5	2	2	2	1	407	42.1	5.07	2.09	2
FALSE	High	Master Protein	Q4G0F5	Vacuolar protein sorting-associated protein 26B OS=Homo sapiens GN=VPS26B PE=1 SV=2	0.001	3.956	3	1	1	1	1	336	39.1	7.36	1.77	1
FALSE	High	Master Protein	P57088	Transmembrane protein 33 OS=Homo sapiens GN=TMEM33 PE=1 SV=2	0.001	3.951	4	1	1	1	1	247	28	9.7	2.03	1
FALSE	High	Master Protein	P60033	CD81 antigen OS=Homo sapiens GN=CD81 PE=1 SV=1	0.001	3.941	8	1	1	1	1	236	25.8	5.29	2.55	1
FALSE	High	Master Protein	Q96B26	Exosome complex component RRP43 OS=Homo sapiens GN=EXOSC8 PE=1 SV=1	0.001	3.94	7	1	1	1	1	276	30	5.3	2.21	1
FALSE	High	Master Protein	Q9H6F5	Coiled-coil domain-containing protein 86 OS=Homo sapiens GN=CCDC86 PE=1 SV=1	0.001	3.939	9	2	2	2	1	360	40.2	10.33	0	2
FALSE	High	Master Protein	Q01658	Protein Dr1 OS=Homo sapiens GN=DR1 PE=1 SV=1	0.001	3.939	7	1	1	1	1	176	19.4	4.75	1.83	1
FALSE	High	Master Protein	Q9Y2B0	Protein canopy homolog 2 OS=Homo sapiens GN=CNPY2 PE=1 SV=1	0.001	3.936	9	1	1	1	1	182	20.6	4.92	1.69	1
FALSE	High	Master Protein	Q9BVC6	Transmembrane protein 109 OS=Homo sapiens GN=TMEM109 PE=1 SV=1	0.001	3.933	5	1	2	1	1	243	26.2	10.48	0	1
FALSE	High	Master Protein	Q9UNS1	Protein timeless homolog OS=Homo sapiens GN=TIMELESS PE=1 SV=2	0.001	3.931	1	1	1	1	1	1208	138.6	5.4	1.87	1
FALSE	High	Master Protein	Q9UK59	Lariat debranching enzyme OS=Homo sapiens GN=DBR1 PE=1 SV=2	0.001	3.91	2	1	1	1	1	544	61.5	5.47	2.37	1
FALSE	High	Master Protein	Q96GD0	Pyridoxal phosphate phosphatase OS=Homo sapiens GN=PDXP PE=1 SV=2	0.001	3.91	6	1	1	1	1	296	31.7	6.55	2.18	1
FALSE	High	Master Protein	Q96C57	Uncharacterized protein C12orf43 OS=Homo sapiens GN=C12orf43 PE=1 SV=2	0.001	3.906	6	1	1	1	1	262	28.2	9.42	1.69	1
FALSE	High	Master Protein	Q5BJH7	Protein YIF1B OS=Homo sapiens GN=YIF1B PE=1 SV=1	0.001	3.906	4	1	1	1	1	314	34.4	9.16	1.66	1
FALSE	High	Master Protein	O15400	Syntaxin-7 OS=Homo sapiens GN=STX7 PE=1 SV=4	0.001	3.905	10	1	1	1	1	261	29.8	5.55	0	1
FALSE	High	Master Protein	P50148	Guanine nucleotide-binding protein G(q) subunit alpha OS=Homo sapiens GN=GNAQ PE=1 SV=4	0.001	3.889	7	2	2	2	1	359	42.1	5.68	0	2
FALSE	High	Master Protein	Q92522	Histone H1x OS=Homo sapiens GN=H1FX PE=1 SV=1	0.001	3.877	6	1	1	1	1	213	22.5	10.76	2.31	1
FALSE	High	Master Protein	O95777	U6 snRNA-associated Sm-like protein LSm8 OS=Homo sapiens GN=LSM8 PE=1 SV=3	0.001	3.873	25	1	1	1	1	96	10.4	4.48	2.25	1
FALSE	High	Master Protein	P49207	60S ribosomal protein L34 OS=Homo sapiens GN=RPL34 PE=1 SV=3	0.001	3.863	13	2	2	2	1	117	13.3	11.47	1.86	2
FALSE	High	Master Protein	P23921	Ribonucleoside-diphosphate reductase large subunit OS=Homo sapiens GN=RRM1 PE=1 SV=1	0.001	3.856	2	1	1	1	1	792	90	7.15	1.76	1
FALSE	High	Master Protein	Q8NCW5	NAD(P)H-hydrate epimerase OS=Homo sapiens GN=NAXE PE=1 SV=2	0.001	3.851	8	1	1	1	1	288	31.7	7.66	2.33	1
FALSE	High	Master Protein	P51148	Ras-related protein Rab-5C OS=Homo sapiens GN=RAB5C PE=1 SV=2	0.001	3.848	12	2	2	1	1	216	23.5	8.41	1.68	2
FALSE	High	Master Protein	O95466	Formin-like protein 1 OS=Homo sapiens GN=FMNL1 PE=1 SV=3	0.001	3.846	1	1	1	1	1	1100	121.8	5.72	1.86	1
FALSE	High	Master Protein	Q16537	Serine/threonine-protein phosphatase 2A 56 kDa regulatory subunit epsilon isoform OS=Homo sapiens GN=PPP2R5E PE=1 SV=1	0.001	3.844	3	1	1	1	1	467	54.7	6.95	0	1
FALSE	High	Master Protein	Q15427	Splicing factor 3B subunit 4 OS=Homo sapiens GN=SF3B4 PE=1 SV=1	0.001	3.843	3	1	1	1	1	424	44.4	8.56	0	1
FALSE	High	Master Protein	Q9UI12	V-type proton ATPase subunit H OS=Homo sapiens GN=ATP6V1H PE=1 SV=1	0.001	3.841	3	1	1	1	1	483	55.8	6.48	2.04	1
FALSE	High	Master Protein	P78417	Glutathione S-transferase omega-1 OS=Homo sapiens GN=GSTO1 PE=1 SV=2	0.001	3.826	10	2	3	2	1	241	27.5	6.6	1.97	2
FALSE	High	Master Protein	P53582	Methionine aminopeptidase 1 OS=Homo sapiens GN=METAP1 PE=1 SV=2	0.001	3.824	5	1	1	1	1	386	43.2	7.17	2.84	1
FALSE	High	Master Protein	Q96T60	Bifunctional polynucleotide phosphatase/kinase OS=Homo sapiens GN=PNKP PE=1 SV=1	0.001	3.82	3	1	1	1	1	521	57	8.46	1.61	1
FALSE	High	Master Protein	Q9NRR5	Ubiquilin-4 OS=Homo sapiens GN=UBQLN4 PE=1 SV=2	0.001	3.815	3	2	2	2	1	601	63.8	5.22	0	2
FALSE	High	Master Protein	Q6Y7W6	PERQ amino acid-rich with GYF domain-containing protein 2 OS=Homo sapiens GN=GIGYF2 PE=1 SV=1	0.001	3.804	1	1	1	1	1	1299	150	5.54	2.22	1
FALSE	High	Master Protein	O15212	Prefoldin subunit 6 OS=Homo sapiens GN=PFDN6 PE=1 SV=1	0.001	3.8	16	2	2	2	1	129	14.6	8.88	1.66	2
FALSE	High	Master Protein	Q6YP21	Kynurenine--oxoglutarate transaminase 3 OS=Homo sapiens GN=KYAT3 PE=1 SV=1	0.001	3.798	3	1	1	1	1	454	51.4	8.19	0	1
FALSE	High	Master Protein	P42224	Signal transducer and activator of transcription 1-alpha/beta OS=Homo sapiens GN=STAT1 PE=1 SV=2	0.001	3.793	3	2	2	2	1	750	87.3	6.05	0	2
FALSE	High	Master Protein	Q01650	Large neutral amino acids transporter small subunit 1 OS=Homo sapiens GN=SLC7A5 PE=1 SV=2	0.001	3.78	4	1	1	1	1	507	55	7.72	1.9	1
FALSE	High	Master Protein	Q15555	Microtubule-associated protein RP/EB family member 2 OS=Homo sapiens GN=MAPRE2 PE=1 SV=1	0.001	3.771	6	1	1	1	1	327	37	5.57	0	1
FALSE	High	Master Protein	Q99447	Ethanolamine-phosphate cytidylyltransferase OS=Homo sapiens GN=PCYT2 PE=1 SV=1	0.001	3.767	5	2	2	2	1	389	43.8	6.92	0	2
FALSE	High	Master Protein	Q68EM7	Rho GTPase-activating protein 17 OS=Homo sapiens GN=ARHGAP17 PE=1 SV=1	0.001	3.766	1	1	1	1	1	881	95.4	7.62	0	1
FALSE	High	Master Protein	O75153	Clustered mitochondria protein homolog OS=Homo sapiens GN=CLUH PE=1 SV=2	0.001	3.764	1	1	1	1	1	1309	146.6	6.13	0	1
FALSE	High	Master Protein	O43818	U3 small nucleolar RNA-interacting protein 2 OS=Homo sapiens GN=RRP9 PE=1 SV=1	0.001	3.747	4	1	1	1	1	475	51.8	7.85	0	1
FALSE	High	Master Protein	Q86WX3	Active regulator of SIRT1 OS=Homo sapiens GN=RPS19BP1 PE=1 SV=1	0.001	3.742	10	1	1	1	1	136	15.4	10.74	1.73	1
FALSE	High	Master Protein	Q7Z4W1	L-xylulose reductase OS=Homo sapiens GN=DCXR PE=1 SV=2	0.001	3.738	12	2	2	2	1	244	25.9	8.1	0	2
FALSE	High	Master Protein	Q9Y263	Phospholipase A-2-activating protein OS=Homo sapiens GN=PLAA PE=1 SV=2	0.001	3.737	4	2	2	2	1	795	87.1	6.37	0	2
FALSE	High	Master Protein	Q13601	KRR1 small subunit processome component homolog OS=Homo sapiens GN=KRR1 PE=1 SV=4	0.001	3.734	3	1	1	1	1	381	43.6	9.77	0	1
FALSE	High	Master Protein	Q9Y6A4	Cilia- and flagella-associated protein 20 OS=Homo sapiens GN=CFAP20 PE=1 SV=1	0.001	3.734	6	1	1	1	1	193	22.8	9.76	1.96	1
FALSE	High	Master Protein	Q9BTD8	RNA-binding protein 42 OS=Homo sapiens GN=RBM42 PE=1 SV=1	0.001	3.733	4	1	1	1	1	480	50.4	9.63	0	1
FALSE	High	Master Protein	Q9H0C8	Integrin-linked kinase-associated serine/threonine phosphatase 2C OS=Homo sapiens GN=ILKAP PE=1 SV=1	0.001	3.731	6	1	1	1	1	392	42.9	7.09	0	1
FALSE	High	Master Protein	O15498	Synaptobrevin homolog YKT6 OS=Homo sapiens GN=YKT6 PE=1 SV=1	0.001	3.729	9	1	1	1	1	198	22.4	6.92	0	1
FALSE	High	Master Protein	P83881	60S ribosomal protein L36a OS=Homo sapiens GN=RPL36A PE=1 SV=2	0.001	3.726	12	1	2	1	1	106	12.4	10.58	0	1
FALSE	High	Master Protein	Q9NYB0	Telomeric repeat-binding factor 2-interacting protein 1 OS=Homo sapiens GN=TERF2IP PE=1 SV=1	0.001	3.722	7	1	2	1	1	399	44.2	4.73	0	1
FALSE	High	Master Protein	Q9NUL3	Double-stranded RNA-binding protein Staufen homolog 2 OS=Homo sapiens GN=STAU2 PE=1 SV=1	0.001	3.722	3	1	1	1	1	570	62.6	9.61	0	1
FALSE	High	Master Protein	P56192	Methionine--tRNA ligase, cytoplasmic OS=Homo sapiens GN=MARS PE=1 SV=2	0.001	3.72	5	2	3	2	1	900	101.1	6.16	0	2
FALSE	High	Master Protein	P61758	Prefoldin subunit 3 OS=Homo sapiens GN=VBP1 PE=1 SV=3	0.001	3.712	5	1	2	1	1	197	22.6	7.11	2.03	1
FALSE	High	Master Protein	Q09666	Neuroblast differentiation-associated protein AHNAK OS=Homo sapiens GN=AHNAK PE=1 SV=2	0.001	3.706	2	2	2	2	1	5890	628.7	6.15	0	2
FALSE	High	Master Protein	Q5VT52	Regulation of nuclear pre-mRNA domain-containing protein 2 OS=Homo sapiens GN=RPRD2 PE=1 SV=1	0.001	3.706	1	1	1	1	1	1461	155.9	7.42	0	1
FALSE	High	Master Protein	O95747	Serine/threonine-protein kinase OSR1 OS=Homo sapiens GN=OXSR1 PE=1 SV=1	0.001	3.7	4	2	2	2	1	527	58	6.43	0	2
FALSE	High	Master Protein	P12277	Creatine kinase B-type OS=Homo sapiens GN=CKB PE=1 SV=1	0.001	3.699	6	1	1	1	1	381	42.6	5.59	0	1
FALSE	High	Master Protein	Q9UBS4	DnaJ homolog subfamily B member 11 OS=Homo sapiens GN=DNAJB11 PE=1 SV=1	0.001	3.695	9	2	2	2	1	358	40.5	6.18	0	2
FALSE	High	Master Protein	P62633	Cellular nucleic acid-binding protein OS=Homo sapiens GN=CNBP PE=1 SV=1	0.001	3.691	8	1	1	1	1	177	19.5	7.71	0	1
FALSE	High	Master Protein	P53597	Succinate--CoA ligase [ADP/GDP-forming] subunit alpha, mitochondrial OS=Homo sapiens GN=SUCLG1 PE=1 SV=4	0.001	3.691	5	1	1	1	1	346	36.2	8.79	2.11	1
FALSE	High	Master Protein	A8MWD9	Putative small nuclear ribonucleoprotein G-like protein 15 OS=Homo sapiens GN=SNRPGP15 PE=5 SV=2	0.001	3.69	17	1	1	1	1	76	8.5	8.84	1.84	1
FALSE	High	Master Protein	P09497	Clathrin light chain B OS=Homo sapiens GN=CLTB PE=1 SV=1	0.001	3.689	4	1	1	1	1	229	25.2	4.64	2.44	1
FALSE	High	Master Protein	P52788	Spermine synthase OS=Homo sapiens GN=SMS PE=1 SV=2	0.001	3.684	6	1	1	1	1	366	41.2	5.02	0	1
FALSE	High	Master Protein	Q16740	ATP-dependent Clp protease proteolytic subunit, mitochondrial OS=Homo sapiens GN=CLPP PE=1 SV=1	0.001	3.683	12	1	2	1	1	277	30.2	8.09	0	1
FALSE	High	Master Protein	Q9UBE0	SUMO-activating enzyme subunit 1 OS=Homo sapiens GN=SAE1 PE=1 SV=1	0.001	3.679	6	1	1	1	1	346	38.4	5.3	0	1
FALSE	High	Master Protein	Q9BWT6	Meiotic nuclear division protein 1 homolog OS=Homo sapiens GN=MND1 PE=1 SV=1	0.001	3.672	7	1	1	1	1	205	23.7	8.19	0	1
FALSE	High	Master Protein	Q92541	RNA polymerase-associated protein RTF1 homolog OS=Homo sapiens GN=RTF1 PE=1 SV=4	0.001	3.665	2	1	1	1	1	710	80.3	8.15	1.88	1
FALSE	High	Master Protein	Q9Y3B3	Transmembrane emp24 domain-containing protein 7 OS=Homo sapiens GN=TMED7 PE=1 SV=2	0.001	3.661	5	1	1	1	1	224	25.2	6.89	2.56	1
FALSE	High	Master Protein	Q9UBC2	Epidermal growth factor receptor substrate 15-like 1 OS=Homo sapiens GN=EPS15L1 PE=1 SV=1	0.001	3.655	2	1	1	1	1	864	94.2	5.11	0	1
FALSE	High	Master Protein	O75822	Eukaryotic translation initiation factor 3 subunit J OS=Homo sapiens GN=EIF3J PE=1 SV=2	0.001	3.655	5	1	1	1	1	258	29	4.83	1.73	1
FALSE	High	Master Protein	Q15050	Ribosome biogenesis regulatory protein homolog OS=Homo sapiens GN=RRS1 PE=1 SV=2	0.001	3.652	4	1	1	1	1	365	41.2	10.7	0	1
FALSE	High	Master Protein	Q9Y657	Spindlin-1 OS=Homo sapiens GN=SPIN1 PE=1 SV=3	0.001	3.641	4	1	1	1	1	262	29.6	6.96	0	1
FALSE	High	Master Protein	Q96F63	Coiled-coil domain-containing protein 97 OS=Homo sapiens GN=CCDC97 PE=1 SV=1	0.001	3.64	3	1	1	1	1	343	38.9	4.59	1.79	1
FALSE	High	Master Protein	Q16566	Calcium/calmodulin-dependent protein kinase type IV OS=Homo sapiens GN=CAMK4 PE=1 SV=1	0.001	3.635	3	1	1	1	1	473	51.9	5.82	1.7	1
FALSE	High	Master Protein	Q96B54	Zinc finger protein 428 OS=Homo sapiens GN=ZNF428 PE=1 SV=2	0.001	3.629	9	1	1	1	1	188	20.5	4.17	2.05	1
FALSE	High	Master Protein	P01111	GTPase NRas OS=Homo sapiens GN=NRAS PE=1 SV=1	0.001	3.628	6	1	1	1	1	189	21.2	5.17	1.96	1
FALSE	High	Master Protein	P13807	Glycogen [starch] synthase, muscle OS=Homo sapiens GN=GYS1 PE=1 SV=2	0.001	3.62	1	1	1	1	1	737	83.7	6.18	2.22	1
FALSE	High	Master Protein	Q05048	Cleavage stimulation factor subunit 1 OS=Homo sapiens GN=CSTF1 PE=1 SV=1	0.001	3.61	4	1	1	1	1	431	48.3	6.58	0	1
FALSE	High	Master Protein	Q8NBX0	Saccharopine dehydrogenase-like oxidoreductase OS=Homo sapiens GN=SCCPDH PE=1 SV=1	0.001	3.61	3	1	1	1	1	429	47.1	9.14	1.71	1
FALSE	High	Master Protein	Q08881	Tyrosine-protein kinase ITK/TSK OS=Homo sapiens GN=ITK PE=1 SV=1	0.001	3.609	2	1	1	1	1	620	71.8	7.58	1.83	1
FALSE	High	Master Protein	P51570	Galactokinase OS=Homo sapiens GN=GALK1 PE=1 SV=1	0.001	3.602	3	1	1	1	1	392	42.2	6.46	1.69	1
FALSE	High	Master Protein	P46776	60S ribosomal protein L27a OS=Homo sapiens GN=RPL27A PE=1 SV=2	0.001	3.601	7	1	2	1	1	148	16.6	11	4.62	1
FALSE	High	Master Protein	Q969G3	SWI/SNF-related matrix-associated actin-dependent regulator of chromatin subfamily E member 1 OS=Homo sapiens GN=SMARCE1 PE=1 SV=2	0.001	3.6	3	1	1	1	1	411	46.6	4.88	1.62	1
FALSE	High	Master Protein	Q14558	Phosphoribosyl pyrophosphate synthase-associated protein 1 OS=Homo sapiens GN=PRPSAP1 PE=1 SV=2	0.001	3.588	6	1	1	1	1	356	39.4	7.2	0	1
FALSE	High	Master Protein	Q16774	Guanylate kinase OS=Homo sapiens GN=GUK1 PE=1 SV=2	0.001	3.585	6	1	1	1	1	197	21.7	6.55	0	1
FALSE	High	Master Protein	Q96C90	Protein phosphatase 1 regulatory subunit 14B OS=Homo sapiens GN=PPP1R14B PE=1 SV=3	0.001	3.577	17	1	1	1	1	147	15.9	4.86	2.81	1
FALSE	High	Master Protein	Q16222	UDP-N-acetylhexosamine pyrophosphorylase OS=Homo sapiens GN=UAP1 PE=1 SV=3	0.001	3.575	3	1	1	1	1	522	58.7	6.33	1.98	1
FALSE	High	Master Protein	Q8N6H7	ADP-ribosylation factor GTPase-activating protein 2 OS=Homo sapiens GN=ARFGAP2 PE=1 SV=1	0.001	3.573	2	1	1	1	1	521	56.7	7.99	0	1
FALSE	High	Master Protein	Q9HD20	Manganese-transporting ATPase 13A1 OS=Homo sapiens GN=ATP13A1 PE=1 SV=2	0.001	3.573	1	1	1	1	1	1204	132.9	8.13	2.12	1
FALSE	High	Master Protein	P55957	BH3-interacting domain death agonist OS=Homo sapiens GN=BID PE=1 SV=1	0.001	3.569	7	1	1	1	1	195	22	5.44	0	1
FALSE	High	Master Protein	Q9Y5P4	Collagen type IV alpha-3-binding protein OS=Homo sapiens GN=COL4A3BP PE=1 SV=1	0.001	3.562	2	1	1	1	1	624	70.8	5.48	1.63	1
FALSE	High	Master Protein	Q9Y2S7	Polymerase delta-interacting protein 2 OS=Homo sapiens GN=POLDIP2 PE=1 SV=1	0.001	3.558	4	1	1	1	1	368	42	8.63	0	1
FALSE	High	Master Protein	P63151	Serine/threonine-protein phosphatase 2A 55 kDa regulatory subunit B alpha isoform OS=Homo sapiens GN=PPP2R2A PE=1 SV=1	0.001	3.554	2	1	1	1	1	447	51.7	6.2	1.73	1
FALSE	High	Master Protein	P78362	SRSF protein kinase 2 OS=Homo sapiens GN=SRPK2 PE=1 SV=3	0.001	3.554	3	1	1	1	1	688	77.5	4.97	0	1
FALSE	High	Master Protein	Q9UKL0	REST corepressor 1 OS=Homo sapiens GN=RCOR1 PE=1 SV=2	0.001	3.547	3	1	1	1	1	485	53.3	7.03	0	1
FALSE	High	Master Protein	O43924	Retinal rod rhodopsin-sensitive cGMP 3',5'-cyclic phosphodiesterase subunit delta OS=Homo sapiens GN=PDE6D PE=1 SV=1	0.001	3.542	8	1	1	1	1	150	17.4	5.67	0	1
FALSE	High	Master Protein	P02788	Lactotransferrin OS=Homo sapiens GN=LTF PE=1 SV=6	0.001	3.54	2	1	1	1	1	710	78.1	8.12	2.08	1
FALSE	High	Master Protein	Q96JB5	CDK5 regulatory subunit-associated protein 3 OS=Homo sapiens GN=CDK5RAP3 PE=1 SV=2	0.001	3.538	3	1	1	1	1	506	56.9	4.75	1.66	1
FALSE	High	Master Protein	P35813	Protein phosphatase 1A OS=Homo sapiens GN=PPM1A PE=1 SV=1	0.001	3.511	6	1	1	1	1	382	42.4	5.36	0	1
FALSE	High	Master Protein	Q13501	Sequestosome-1 OS=Homo sapiens GN=SQSTM1 PE=1 SV=1	0.001	3.5	6	1	1	1	1	440	47.7	5.22	0	1
FALSE	High	Master Protein	Q8WUH1	Protein Churchill OS=Homo sapiens GN=CHURC1 PE=1 SV=2	0.001	3.499	9	1	1	1	1	139	16.1	5.54	1.71	1
FALSE	High	Master Protein	O14907	Tax1-binding protein 3 OS=Homo sapiens GN=TAX1BP3 PE=1 SV=2	0.001	3.499	14	1	1	1	1	124	13.7	8.48	0	1
FALSE	High	Master Protein	Q9Y3S2	Zinc finger protein 330 OS=Homo sapiens GN=ZNF330 PE=1 SV=1	0.001	3.498	7	1	1	1	1	320	36.2	6.16	0	1
FALSE	High	Master Protein	P20042	Eukaryotic translation initiation factor 2 subunit 2 OS=Homo sapiens GN=EIF2S2 PE=1 SV=2	0.001	3.488	3	1	1	1	1	333	38.4	5.8	0	1
FALSE	High	Master Protein	Q7Z3B4	Nucleoporin p54 OS=Homo sapiens GN=NUP54 PE=1 SV=2	0.001	3.48	3	1	1	1	1	507	55.4	7.02	1.69	1
FALSE	High	Master Protein	P14550	Alcohol dehydrogenase [NADP(+)] OS=Homo sapiens GN=AKR1A1 PE=1 SV=3	0.001	3.476	5	1	1	1	1	325	36.6	6.79	2.12	1
FALSE	High	Master Protein	Q13464	Rho-associated protein kinase 1 OS=Homo sapiens GN=ROCK1 PE=1 SV=1	0.001	3.475	1	1	1	1	1	1354	158.1	5.9	0	1
FALSE	High	Master Protein	P48507	Glutamate--cysteine ligase regulatory subunit OS=Homo sapiens GN=GCLM PE=1 SV=1	0.001	3.469	5	1	1	1	1	274	30.7	6.02	0	1
FALSE	High	Master Protein	Q53HC9	Protein TSSC1 OS=Homo sapiens GN=EIPR1 PE=1 SV=2	0.001	3.466	3	1	1	1	1	387	43.6	5.06	0	1
FALSE	High	Master Protein	O15514	DNA-directed RNA polymerase II subunit RPB4 OS=Homo sapiens GN=POLR2D PE=1 SV=1	0.001	3.464	11	1	1	1	1	142	16.3	4.79	0	1
FALSE	High	Master Protein	P30876	DNA-directed RNA polymerase II subunit RPB2 OS=Homo sapiens GN=POLR2B PE=1 SV=1	0.001	3.462	4	2	2	2	1	1174	133.8	6.87	0	2
FALSE	High	Master Protein	Q5SRD1	Putative mitochondrial import inner membrane translocase subunit Tim23B OS=Homo sapiens GN=TIMM23B PE=5 SV=2	0.001	3.454	7	1	1	1	1	257	28	9.39	0	1
FALSE	High	Master Protein	Q9UIV1	CCR4-NOT transcription complex subunit 7 OS=Homo sapiens GN=CNOT7 PE=1 SV=3	0.001	3.453	5	1	1	1	1	285	32.7	4.84	0	1
FALSE	High	Master Protein	O00233	26S proteasome non-ATPase regulatory subunit 9 OS=Homo sapiens GN=PSMD9 PE=1 SV=3	0.001	3.452	11	2	2	2	1	223	24.7	6.95	1.64	2
FALSE	High	Master Protein	P18621	60S ribosomal protein L17 OS=Homo sapiens GN=RPL17 PE=1 SV=3	0.001	3.45	5	1	3	1	1	184	21.4	10.17	2.36	1
FALSE	High	Master Protein	Q9UNL2	Translocon-associated protein subunit gamma OS=Homo sapiens GN=SSR3 PE=1 SV=1	0.001	3.448	8	1	1	1	1	185	21.1	9.61	1.71	1
FALSE	High	Master Protein	Q69YN4	Protein virilizer homolog OS=Homo sapiens GN=KIAA1429 PE=1 SV=2	0.001	3.442	1	1	1	1	1	1812	201.9	5.01	0	1
FALSE	High	Master Protein	O75223	Gamma-glutamylcyclotransferase OS=Homo sapiens GN=GGCT PE=1 SV=1	0.001	3.431	5	1	1	1	1	188	21	5.14	1.82	1
FALSE	High	Master Protein	Q04726	Transducin-like enhancer protein 3 OS=Homo sapiens GN=TLE3 PE=1 SV=2	0.001	3.43	3	2	2	2	1	772	83.4	7.2	0	2
FALSE	High	Master Protein	Q9C0C9	(E3-independent) E2 ubiquitin-conjugating enzyme OS=Homo sapiens GN=UBE2O PE=1 SV=3	0.001	3.427	2	1	1	1	1	1292	141.2	5.12	0	1
FALSE	High	Master Protein	Q8N1N4	Keratin, type II cytoskeletal 78 OS=Homo sapiens GN=KRT78 PE=2 SV=2	0.001	3.424	3	1	1	1	1	520	56.8	6.02	0	1
FALSE	High	Master Protein	P37108	Signal recognition particle 14 kDa protein OS=Homo sapiens GN=SRP14 PE=1 SV=2	0.001	3.423	7	1	2	1	1	136	14.6	10.04	1.74	1
FALSE	High	Master Protein	P53611	Geranylgeranyl transferase type-2 subunit beta OS=Homo sapiens GN=RABGGTB PE=1 SV=2	0.001	3.419	3	1	1	1	1	331	36.9	5.03	1.95	1
FALSE	High	Master Protein	Q5T653	39S ribosomal protein L2, mitochondrial OS=Homo sapiens GN=MRPL2 PE=1 SV=2	0.001	3.416	8	1	1	1	1	305	33.3	11.3	0	1
FALSE	High	Master Protein	Q9UBW5	Bridging integrator 2 OS=Homo sapiens GN=BIN2 PE=1 SV=3	0.001	3.407	4	1	1	1	1	565	61.8	5.15	0	1
FALSE	High	Master Protein	Q9NPA0	ER membrane protein complex subunit 7 OS=Homo sapiens GN=EMC7 PE=1 SV=1	0.001	3.407	10	1	1	1	1	242	26.5	9.25	3.1	1
FALSE	High	Master Protein	O14497	AT-rich interactive domain-containing protein 1A OS=Homo sapiens GN=ARID1A PE=1 SV=3	0.001	3.391	1	1	1	1	1	2285	241.9	6.7	0	1
FALSE	High	Master Protein	P13995	Bifunctional methylenetetrahydrofolate dehydrogenase/cyclohydrolase, mitochondrial OS=Homo sapiens GN=MTHFD2 PE=1 SV=2	0.001	3.386	3	1	1	1	1	350	37.9	8.73	1.86	1
FALSE	High	Master Protein	Q9Y2V2	Calcium-regulated heat-stable protein 1 OS=Homo sapiens GN=CARHSP1 PE=1 SV=2	0.001	3.386	11	1	2	1	1	147	15.9	8.21	0	1
FALSE	High	Master Protein	P53701	Cytochrome c-type heme lyase OS=Homo sapiens GN=HCCS PE=1 SV=1	0.001	3.383	4	1	1	1	1	268	30.6	6.68	2.1	1
FALSE	High	Master Protein	Q9BTE6	Alanyl-tRNA editing protein Aarsd1 OS=Homo sapiens GN=AARSD1 PE=1 SV=2	0.001	3.379	11	2	2	2	1	412	45.5	6.42	0	2
FALSE	High	Master Protein	Q9BUR5	MICOS complex subunit MIC26 OS=Homo sapiens GN=APOO PE=1 SV=1	0.001	3.378	8	1	1	1	1	198	22.3	9.13	2.09	1
FALSE	High	Master Protein	Q14353	Guanidinoacetate N-methyltransferase OS=Homo sapiens GN=GAMT PE=1 SV=1	0.001	3.376	9	1	1	1	1	236	26.3	6.14	0	1
FALSE	High	Master Protein	Q16836	Hydroxyacyl-coenzyme A dehydrogenase, mitochondrial OS=Homo sapiens GN=HADH PE=1 SV=3	0.001	3.374	3	1	1	1	1	314	34.3	8.85	1.62	1
FALSE	High	Master Protein	Q08752	Peptidyl-prolyl cis-trans isomerase D OS=Homo sapiens GN=PPID PE=1 SV=3	0.001	3.374	6	1	1	1	1	370	40.7	7.21	0	1
FALSE	High	Master Protein	P78316	Nucleolar protein 14 OS=Homo sapiens GN=NOP14 PE=1 SV=3	0.001	3.372	2	1	1	1	1	857	97.6	7.58	0	1
FALSE	High	Master Protein	O60563	Cyclin-T1 OS=Homo sapiens GN=CCNT1 PE=1 SV=1	0.001	3.371	4	1	1	1	1	726	80.6	8.78	0	1
FALSE	High	Master Protein	Q9BTE1	Dynactin subunit 5 OS=Homo sapiens GN=DCTN5 PE=1 SV=1	0.001	3.363	8	1	1	1	1	182	20.1	8.02	2.01	1
FALSE	High	Master Protein	P52298	Nuclear cap-binding protein subunit 2 OS=Homo sapiens GN=NCBP2 PE=1 SV=1	0.001	3.363	8	1	1	1	1	156	18	8.21	0	1
FALSE	High	Master Protein	Q9NPJ3	Acyl-coenzyme A thioesterase 13 OS=Homo sapiens GN=ACOT13 PE=1 SV=1	0.001	3.356	9	1	1	1	1	140	15	9.14	0	1
FALSE	High	Master Protein	P62841	40S ribosomal protein S15 OS=Homo sapiens GN=RPS15 PE=1 SV=2	0.001	3.355	8	1	1	1	1	145	17	10.39	0	1
FALSE	High	Master Protein	P82673	28S ribosomal protein S35, mitochondrial OS=Homo sapiens GN=MRPS35 PE=1 SV=1	0.001	3.35	6	1	1	1	1	323	36.8	8.24	0	1
FALSE	High	Master Protein	Q9BTV4	Transmembrane protein 43 OS=Homo sapiens GN=TMEM43 PE=1 SV=1	0.001	3.348	7	1	1	1	1	400	44.8	8.13	0	1
FALSE	High	Master Protein	P22570	NADPH:adrenodoxin oxidoreductase, mitochondrial OS=Homo sapiens GN=FDXR PE=1 SV=3	0.001	3.344	3	1	1	1	1	491	53.8	8.44	0	1
FALSE	High	Master Protein	P53634	Dipeptidyl peptidase 1 OS=Homo sapiens GN=CTSC PE=1 SV=2	0.001	3.343	5	1	1	1	1	463	51.8	6.99	2.88	1
FALSE	High	Master Protein	Q9UJ70	N-acetyl-D-glucosamine kinase OS=Homo sapiens GN=NAGK PE=1 SV=4	0.001	3.333	5	1	1	1	1	344	37.4	6.24	2.52	1
FALSE	High	Master Protein	P09012	U1 small nuclear ribonucleoprotein A OS=Homo sapiens GN=SNRPA PE=1 SV=3	0.001	3.326	11	1	1	1	1	282	31.3	9.83	0	1
FALSE	High	Master Protein	Q13586	Stromal interaction molecule 1 OS=Homo sapiens GN=STIM1 PE=1 SV=3	0.001	3.324	3	1	1	1	1	685	77.4	6.67	0	1
FALSE	High	Master Protein	O95373	Importin-7 OS=Homo sapiens GN=IPO7 PE=1 SV=1	0.001	3.316	1	1	1	1	1	1038	119.4	4.82	2.81	1
FALSE	High	Master Protein	Q12849	G-rich sequence factor 1 OS=Homo sapiens GN=GRSF1 PE=1 SV=3	0.001	3.316	2	1	1	1	1	480	53.1	6.19	0	1
FALSE	High	Master Protein	P23588	Eukaryotic translation initiation factor 4B OS=Homo sapiens GN=EIF4B PE=1 SV=2	0.001	3.314	3	1	1	1	1	611	69.1	5.73	0	1
FALSE	High	Master Protein	O94979	Protein transport protein Sec31A OS=Homo sapiens GN=SEC31A PE=1 SV=3	0.001	3.312	1	1	1	1	1	1220	132.9	6.89	2.57	1
FALSE	High	Master Protein	P62910	60S ribosomal protein L32 OS=Homo sapiens GN=RPL32 PE=1 SV=2	0.001	3.312	10	1	1	1	1	135	15.9	11.33	0	1
FALSE	High	Master Protein	Q9BS26	Endoplasmic reticulum resident protein 44 OS=Homo sapiens GN=ERP44 PE=1 SV=1	0.001	3.31	2	1	1	1	1	406	46.9	5.26	1.93	1
FALSE	High	Master Protein	Q12769	Nuclear pore complex protein Nup160 OS=Homo sapiens GN=NUP160 PE=1 SV=3	0.001	3.305	2	2	2	2	1	1436	162	5.5	1.72	2
FALSE	High	Master Protein	O60547	GDP-mannose 4,6 dehydratase OS=Homo sapiens GN=GMDS PE=1 SV=1	0.001	3.304	4	1	1	1	1	372	41.9	7.31	0	1
FALSE	High	Master Protein	Q9Y2D5	A-kinase anchor protein 2 OS=Homo sapiens GN=AKAP2 PE=1 SV=3	0.001	3.303	1	1	1	1	1	859	94.6	5.11	0	1
FALSE	High	Master Protein	Q8WUM0	Nuclear pore complex protein Nup133 OS=Homo sapiens GN=NUP133 PE=1 SV=2	0.001	3.302	1	1	1	1	1	1156	128.9	5.1	0	1
FALSE	High	Master Protein	P07311	Acylphosphatase-1 OS=Homo sapiens GN=ACYP1 PE=1 SV=2	0.001	3.296	10	1	1	1	1	99	11.3	9.31	0	1
FALSE	High	Master Protein	Q7Z5R6	Amyloid beta A4 precursor protein-binding family B member 1-interacting protein OS=Homo sapiens GN=APBB1IP PE=1 SV=1	0.001	3.283	4	1	1	1	1	666	73.1	5.59	0	1
FALSE	High	Master Protein	P30049	ATP synthase subunit delta, mitochondrial OS=Homo sapiens GN=ATP5D PE=1 SV=2	0.001	3.282	8	1	1	1	1	168	17.5	5.49	0	1
FALSE	High	Master Protein	Q93050	V-type proton ATPase 116 kDa subunit a isoform 1 OS=Homo sapiens GN=ATP6V0A1 PE=1 SV=3	0.001	3.282	1	1	1	1	1	837	96.4	6.43	0	1
FALSE	High	Master Protein	Q9UGJ0	5'-AMP-activated protein kinase subunit gamma-2 OS=Homo sapiens GN=PRKAG2 PE=1 SV=1	0.001	3.278	2	1	1	1	1	569	63	9.35	1.67	1
FALSE	High	Master Protein	P06730	Eukaryotic translation initiation factor 4E OS=Homo sapiens GN=EIF4E PE=1 SV=2	0.001	3.275	5	1	1	1	1	217	25.1	6.15	0	1
FALSE	High	Master Protein	Q96GM8	Target of EGR1 protein 1 OS=Homo sapiens GN=TOE1 PE=1 SV=1	0.001	3.27	4	1	1	1	1	510	56.5	7.18	0	1
FALSE	High	Master Protein	P17174	Aspartate aminotransferase, cytoplasmic OS=Homo sapiens GN=GOT1 PE=1 SV=3	0.001	3.26	3	1	1	1	1	413	46.2	7.01	1.62	1
FALSE	High	Master Protein	Q00013	55 kDa erythrocyte membrane protein OS=Homo sapiens GN=MPP1 PE=1 SV=2	0.001	3.251	3	1	1	1	1	466	52.3	7.37	0	1
FALSE	High	Master Protein	Q9UPT8	Zinc finger CCCH domain-containing protein 4 OS=Homo sapiens GN=ZC3H4 PE=1 SV=3	0.001	3.248	2	1	1	1	1	1303	140.2	6.27	0	1
FALSE	High	Master Protein	Q00688	Peptidyl-prolyl cis-trans isomerase FKBP3 OS=Homo sapiens GN=FKBP3 PE=1 SV=1	0.001	3.247	10	2	2	2	1	224	25.2	9.28	0	2
FALSE	High	Master Protein	O95571	Persulfide dioxygenase ETHE1, mitochondrial OS=Homo sapiens GN=ETHE1 PE=1 SV=2	0.001	3.239	5	1	1	1	1	254	27.9	6.83	0	1
FALSE	High	Master Protein	Q06265	Exosome complex component RRP45 OS=Homo sapiens GN=EXOSC9 PE=1 SV=3	0.001	3.238	3	1	1	1	1	439	48.9	5.29	0	1
FALSE	High	Master Protein	Q9UJX3	Anaphase-promoting complex subunit 7 OS=Homo sapiens GN=ANAPC7 PE=1 SV=4	0.001	3.234	4	1	1	1	1	599	66.8	5.64	0	1
FALSE	High	Master Protein	Q9BRR6	ADP-dependent glucokinase OS=Homo sapiens GN=ADPGK PE=1 SV=1	0.001	3.233	3	1	1	1	1	497	54.1	6.2	0	1
FALSE	High	Master Protein	Q13451	Peptidyl-prolyl cis-trans isomerase FKBP5 OS=Homo sapiens GN=FKBP5 PE=1 SV=2	0.001	3.233	4	1	1	1	1	457	51.2	5.9	0	1
FALSE	High	Master Protein	Q86W42	THO complex subunit 6 homolog OS=Homo sapiens GN=THOC6 PE=1 SV=1	0.001	3.229	7	1	1	1	1	341	37.5	7.43	0	1
FALSE	High	Master Protein	P62306	Small nuclear ribonucleoprotein F OS=Homo sapiens GN=SNRPF PE=1 SV=1	0.001	3.226	9	1	2	1	1	86	9.7	4.67	4.26	1
FALSE	High	Master Protein	O95989	Diphosphoinositol polyphosphate phosphohydrolase 1 OS=Homo sapiens GN=NUDT3 PE=1 SV=1	0.001	3.225	8	1	1	1	1	172	19.5	6.34	1.93	1
FALSE	High	Master Protein	Q9BWE0	Replication initiator 1 OS=Homo sapiens GN=REPIN1 PE=1 SV=1	0.001	3.221	3	1	1	1	1	567	63.5	9.98	0	1
FALSE	High	Master Protein	Q9Y4K4	Mitogen-activated protein kinase kinase kinase kinase 5 OS=Homo sapiens GN=MAP4K5 PE=1 SV=1	0.001	3.221	2	1	1	1	1	846	95	7.64	0	1
FALSE	High	Master Protein	Q9NQ29	Putative RNA-binding protein Luc7-like 1 OS=Homo sapiens GN=LUC7L PE=1 SV=1	0.001	3.221	3	1	1	1	1	371	43.7	9.92	0	1
FALSE	High	Master Protein	Q9Y2K7	Lysine-specific demethylase 2A OS=Homo sapiens GN=KDM2A PE=1 SV=3	0.001	3.217	1	1	1	1	1	1162	132.7	7.58	0	1
FALSE	High	Master Protein	Q96P63	Serpin B12 OS=Homo sapiens GN=SERPINB12 PE=1 SV=1	0.001	3.216	4	1	1	1	1	405	46.2	5.53	1.83	1
FALSE	High	Master Protein	Q01081	Splicing factor U2AF 35 kDa subunit OS=Homo sapiens GN=U2AF1 PE=1 SV=3	0.001	3.211	8	1	2	1	1	240	27.9	8.81	0	1
FALSE	High	Master Protein	Q96P16	Regulation of nuclear pre-mRNA domain-containing protein 1A OS=Homo sapiens GN=RPRD1A PE=1 SV=1	0.001	3.21	6	1	1	1	1	312	35.7	7.55	0	1
FALSE	High	Master Protein	O60784	Target of Myb protein 1 OS=Homo sapiens GN=TOM1 PE=1 SV=2	0.001	3.207	5	1	1	1	1	492	53.8	4.7	0	1
FALSE	High	Master Protein	Q13131	5'-AMP-activated protein kinase catalytic subunit alpha-1 OS=Homo sapiens GN=PRKAA1 PE=1 SV=4	0.001	3.203	2	1	1	1	1	559	64	8.12	1.8	1
FALSE	High	Master Protein	Q96DH6	RNA-binding protein Musashi homolog 2 OS=Homo sapiens GN=MSI2 PE=1 SV=1	0.001	3.197	5	1	1	1	1	328	35.2	8.48	0	1
FALSE	High	Master Protein	P84090	Enhancer of rudimentary homolog OS=Homo sapiens GN=ERH PE=1 SV=1	0.001	3.193	16	1	1	1	1	104	12.3	5.92	0	1
FALSE	High	Master Protein	Q9NZN8	CCR4-NOT transcription complex subunit 2 OS=Homo sapiens GN=CNOT2 PE=1 SV=1	0.001	3.192	3	1	1	1	1	540	59.7	7.66	1.89	1
FALSE	High	Master Protein	Q9BZJ0	Crooked neck-like protein 1 OS=Homo sapiens GN=CRNKL1 PE=1 SV=4	0.001	3.191	3	2	2	2	1	848	100.4	8	0	2
FALSE	High	Master Protein	P61254	60S ribosomal protein L26 OS=Homo sapiens GN=RPL26 PE=1 SV=1	0.001	3.19	11	2	4	2	1	145	17.2	10.55	3.98	2
FALSE	High	Master Protein	O14776	Transcription elongation regulator 1 OS=Homo sapiens GN=TCERG1 PE=1 SV=2	0.001	3.183	1	1	1	1	1	1098	123.8	8.65	2.52	1
FALSE	High	Master Protein	O60306	Intron-binding protein aquarius OS=Homo sapiens GN=AQR PE=1 SV=4	0.001	3.181	1	1	1	1	1	1485	171.2	6.37	0	1
FALSE	High	Master Protein	Q9H488	GDP-fucose protein O-fucosyltransferase 1 OS=Homo sapiens GN=POFUT1 PE=1 SV=1	0.001	3.174	3	1	1	1	1	388	43.9	8.53	0	1
FALSE	High	Master Protein	P21912	Succinate dehydrogenase [ubiquinone] iron-sulfur subunit, mitochondrial OS=Homo sapiens GN=SDHB PE=1 SV=3	0.001	3.172	3	1	1	1	1	280	31.6	8.76	1.96	1
FALSE	High	Master Protein	Q6IQ49	Protein SDE2 homolog OS=Homo sapiens GN=SDE2 PE=1 SV=1	0.001	3.17	5	1	1	1	1	451	49.7	6.05	0	1
FALSE	High	Master Protein	Q9Y223	Bifunctional UDP-N-acetylglucosamine 2-epimerase/N-acetylmannosamine kinase OS=Homo sapiens GN=GNE PE=1 SV=1	0.001	3.167	2	1	1	1	1	722	79.2	6.8	0	1
FALSE	High	Master Protein	P62316	Small nuclear ribonucleoprotein Sm D2 OS=Homo sapiens GN=SNRPD2 PE=1 SV=1	0.001	3.165	16	1	1	1	1	118	13.5	9.91	0	1
FALSE	High	Master Protein	Q15418	Ribosomal protein S6 kinase alpha-1 OS=Homo sapiens GN=RPS6KA1 PE=1 SV=2	0.001	3.161	3	1	1	1	1	735	82.7	7.83	0	1
FALSE	High	Master Protein	Q13123	Protein Red OS=Homo sapiens GN=IK PE=1 SV=3	0.001	3.161	4	1	1	1	1	557	65.6	6.64	0	1
FALSE	High	Master Protein	Q9P2E9	Ribosome-binding protein 1 OS=Homo sapiens GN=RRBP1 PE=1 SV=4	0.001	3.154	1	1	1	1	1	1410	152.4	8.6	0	1
FALSE	High	Master Protein	Q969U7	Proteasome assembly chaperone 2 OS=Homo sapiens GN=PSMG2 PE=1 SV=1	0.001	3.153	5	1	1	1	1	264	29.4	6.98	0	1
FALSE	High	Master Protein	Q9UHG3	Prenylcysteine oxidase 1 OS=Homo sapiens GN=PCYOX1 PE=1 SV=3	0.001	3.152	3	1	1	1	1	505	56.6	6.18	0	1
FALSE	High	Master Protein	Q9BVL2	Nucleoporin p58/p45 OS=Homo sapiens GN=NUP58 PE=1 SV=1	0.001	3.151	3	1	1	1	1	599	60.9	9.33	0	1
FALSE	High	Master Protein	Q9NV31	U3 small nucleolar ribonucleoprotein protein IMP3 OS=Homo sapiens GN=IMP3 PE=1 SV=1	0.001	3.146	8	1	1	1	1	184	21.8	9.5	2.2	1
FALSE	High	Master Protein	Q96HS1	Serine/threonine-protein phosphatase PGAM5, mitochondrial OS=Homo sapiens GN=PGAM5 PE=1 SV=2	0.001	3.143	3	1	1	1	1	289	32	8.68	1.72	1
FALSE	High	Master Protein	Q9ULX3	RNA-binding protein NOB1 OS=Homo sapiens GN=NOB1 PE=1 SV=1	0.001	3.142	6	1	1	1	1	412	46.6	7.18	0	1
FALSE	High	Master Protein	Q3LXA3	Triokinase/FMN cyclase OS=Homo sapiens GN=TKFC PE=1 SV=2	0.001	3.128	3	1	1	1	1	575	58.9	7.49	0	1
FALSE	High	Master Protein	P62310	U6 snRNA-associated Sm-like protein LSm3 OS=Homo sapiens GN=LSM3 PE=1 SV=2	0.001	3.124	12	1	1	1	1	102	11.8	4.7	2.25	1
FALSE	High	Master Protein	Q9BXS5	AP-1 complex subunit mu-1 OS=Homo sapiens GN=AP1M1 PE=1 SV=3	0.001	3.12	3	1	1	1	1	423	48.6	7.3	0	1
FALSE	High	Master Protein	Q96SU4	Oxysterol-binding protein-related protein 9 OS=Homo sapiens GN=OSBPL9 PE=1 SV=2	0.001	3.119	2	1	1	1	1	736	83.1	6.18	0	1
FALSE	High	Master Protein	Q86X55	Histone-arginine methyltransferase CARM1 OS=Homo sapiens GN=CARM1 PE=1 SV=3	0.001	3.117	2	1	1	1	1	608	65.8	6.73	0	1
FALSE	High	Master Protein	P61964	WD repeat-containing protein 5 OS=Homo sapiens GN=WDR5 PE=1 SV=1	0.001	3.116	4	1	1	1	1	334	36.6	8.27	0	1
FALSE	High	Master Protein	P18077	60S ribosomal protein L35a OS=Homo sapiens GN=RPL35A PE=1 SV=2	0.001	3.106	9	1	1	1	1	110	12.5	11.06	0	1
FALSE	High	Master Protein	Q9Y5A9	YTH domain-containing family protein 2 OS=Homo sapiens GN=YTHDF2 PE=1 SV=2	0.001	3.103	2	1	1	1	1	579	62.3	8.79	0	1
FALSE	High	Master Protein	P30038	Delta-1-pyrroline-5-carboxylate dehydrogenase, mitochondrial OS=Homo sapiens GN=ALDH4A1 PE=1 SV=3	0.001	3.1	3	1	1	1	1	563	61.7	8.07	0	1
FALSE	High	Master Protein	P05386	60S acidic ribosomal protein P1 OS=Homo sapiens GN=RPLP1 PE=1 SV=1	0.001	3.097	38	1	1	1	1	114	11.5	4.32	0	1
FALSE	High	Master Protein	Q96S59	Ran-binding protein 9 OS=Homo sapiens GN=RANBP9 PE=1 SV=1	0.001	3.094	2	1	1	1	1	729	77.8	6.79	0	1
FALSE	High	Master Protein	O75477	Erlin-1 OS=Homo sapiens GN=ERLIN1 PE=1 SV=1	0.001	3.093	6	1	1	1	1	346	38.9	7.87	0	1
FALSE	High	Master Protein	Q9NVT9	Armadillo repeat-containing protein 1 OS=Homo sapiens GN=ARMC1 PE=1 SV=1	0.001	3.092	4	1	1	1	1	282	31.3	5.74	1.64	1
FALSE	High	Master Protein	Q96Q89	Kinesin-like protein KIF20B OS=Homo sapiens GN=KIF20B PE=1 SV=3	0.001	3.09	0	1	3	1	1	1820	210.5	5.67	1.88	1
FALSE	High	Master Protein	Q96KR1	Zinc finger RNA-binding protein OS=Homo sapiens GN=ZFR PE=1 SV=2	0.001	3.088	1	1	1	1	1	1074	116.9	9.04	0	1
FALSE	High	Master Protein	Q92696	Geranylgeranyl transferase type-2 subunit alpha OS=Homo sapiens GN=RABGGTA PE=1 SV=2	0.001	3.085	4	1	1	1	1	567	65	5.67	0	1
FALSE	High	Master Protein	P62158	Calmodulin OS=Homo sapiens GN=CALM1 PE=1 SV=2	0.001	3.081	11	1	1	1	1	149	16.8	4.22	0	1
FALSE	High	Master Protein	Q9H2P9	Diphthine methyl ester synthase OS=Homo sapiens GN=DPH5 PE=1 SV=2	0.001	3.072	7	1	1	1	1	285	31.6	5.31	0	1
FALSE	High	Master Protein	P14854	Cytochrome c oxidase subunit 6B1 OS=Homo sapiens GN=COX6B1 PE=1 SV=2	0.001	3.067	14	1	1	1	1	86	10.2	7.05	0	1
FALSE	High	Master Protein	Q8N806	Putative E3 ubiquitin-protein ligase UBR7 OS=Homo sapiens GN=UBR7 PE=1 SV=2	0.001	3.061	5	1	1	1	1	425	48	4.81	0	1
FALSE	High	Master Protein	Q8IXJ6	NAD-dependent protein deacetylase sirtuin-2 OS=Homo sapiens GN=SIRT2 PE=1 SV=2	0.001	3.06	3	1	1	1	1	389	43.2	5.36	0	1
FALSE	High	Master Protein	Q14684	Ribosomal RNA processing protein 1 homolog B OS=Homo sapiens GN=RRP1B PE=1 SV=3	0.001	3.059	2	1	1	1	1	758	84.4	9.76	1.68	1
FALSE	High	Master Protein	Q6RFH5	WD repeat-containing protein 74 OS=Homo sapiens GN=WDR74 PE=1 SV=1	0.001	3.058	4	1	1	1	1	385	42.4	8.32	0	1
FALSE	High	Master Protein	Q6UX04	Peptidyl-prolyl cis-trans isomerase CWC27 homolog OS=Homo sapiens GN=CWC27 PE=1 SV=1	0.001	3.054	3	1	1	1	1	472	53.8	5.8	0	1
FALSE	High	Master Protein	Q9UM00	Calcium load-activated calcium channel OS=Homo sapiens GN=TMCO1 PE=1 SV=1	0.001	3.054	7	1	2	1	1	188	21.2	9.74	0	1
FALSE	High	Master Protein	P25311	Zinc-alpha-2-glycoprotein OS=Homo sapiens GN=AZGP1 PE=1 SV=2	0.001	3.042	3	1	1	1	1	298	34.2	6.05	0	1
FALSE	High	Master Protein	P52434	DNA-directed RNA polymerases I, II, and III subunit RPABC3 OS=Homo sapiens GN=POLR2H PE=1 SV=4	0.001	3.041	11	1	1	1	1	150	17.1	4.68	0	1
FALSE	High	Master Protein	O75436	Vacuolar protein sorting-associated protein 26A OS=Homo sapiens GN=VPS26A PE=1 SV=2	0.001	3.04	6	1	1	1	1	327	38.1	6.57	0	1
FALSE	High	Master Protein	Q9Y5V0	Zinc finger protein 706 OS=Homo sapiens GN=ZNF706 PE=1 SV=1	0.001	3.038	14	1	1	1	1	76	8.5	10.01	1.98	1
FALSE	High	Master Protein	P28074	Proteasome subunit beta type-5 OS=Homo sapiens GN=PSMB5 PE=1 SV=3	0.001	3.033	5	1	1	1	1	263	28.5	6.92	0	1
FALSE	High	Master Protein	Q96EK5	KIF1-binding protein OS=Homo sapiens GN=KIF1BP PE=1 SV=1	0.001	3.032	7	1	1	1	1	621	71.8	5.49	0	1
FALSE	High	Master Protein	Q9GZN8	UPF0687 protein C20orf27 OS=Homo sapiens GN=C20orf27 PE=1 SV=3	0.001	3.031	8	1	1	1	1	174	19.3	6.84	2.1	1
FALSE	High	Master Protein	A6NDG6	Glycerol-3-phosphate phosphatase OS=Homo sapiens GN=PGP PE=1 SV=1	0.001	3.027	5	1	1	1	1	321	34	6.14	0	1
FALSE	High	Master Protein	P11177	Pyruvate dehydrogenase E1 component subunit beta, mitochondrial OS=Homo sapiens GN=PDHB PE=1 SV=3	0.001	3.024	4	1	1	1	1	359	39.2	6.65	0	1
FALSE	High	Master Protein	O94763	Unconventional prefoldin RPB5 interactor 1 OS=Homo sapiens GN=URI1 PE=1 SV=3	0.001	3.024	3	1	1	1	1	535	59.8	5.05	0	1
FALSE	High	Master Protein	Q00325	Phosphate carrier protein, mitochondrial OS=Homo sapiens GN=SLC25A3 PE=1 SV=2	0.001	3.021	3	1	2	1	1	362	40.1	9.38	1.85	1
FALSE	High	Master Protein	Q5T6F2	Ubiquitin-associated protein 2 OS=Homo sapiens GN=UBAP2 PE=1 SV=1	0.001	3.015	1	1	1	1	1	1119	117	7.34	0	1
FALSE	High	Master Protein	P10253	Lysosomal alpha-glucosidase OS=Homo sapiens GN=GAA PE=1 SV=4	0.001	3.012	2	1	1	1	1	952	105.3	6	0	1
FALSE	High	Master Protein	O75909	Cyclin-K OS=Homo sapiens GN=CCNK PE=1 SV=2	0.001	3.011	4	1	1	1	1	580	64.2	8.41	0	1
FALSE	High	Master Protein	Q15054	DNA polymerase delta subunit 3 OS=Homo sapiens GN=POLD3 PE=1 SV=2	0.001	3.007	3	1	1	1	1	466	51.4	9.35	0	1
FALSE	High	Master Protein	Q7RTV0	PHD finger-like domain-containing protein 5A OS=Homo sapiens GN=PHF5A PE=1 SV=1	0.001	2.997	14	1	1	1	1	110	12.4	8.41	0	1
FALSE	High	Master Protein	Q06124	Tyrosine-protein phosphatase non-receptor type 11 OS=Homo sapiens GN=PTPN11 PE=1 SV=2	0.001	2.993	2	1	1	1	1	597	68.4	7.3	0	1
FALSE	High	Master Protein	O75323	Protein NipSnap homolog 2 OS=Homo sapiens GN=GBAS PE=1 SV=1	0.001	2.992	3	1	1	1	1	286	33.7	9.36	1.93	1
FALSE	High	Master Protein	P52948	Nuclear pore complex protein Nup98-Nup96 OS=Homo sapiens GN=NUP98 PE=1 SV=4	0.001	2.988	1	2	2	2	1	1817	197.5	6.4	0	2
FALSE	High	Master Protein	P09564	T-cell antigen CD7 OS=Homo sapiens GN=CD7 PE=1 SV=1	0.001	2.987	10	1	1	1	1	240	25.4	7.27	0	1
FALSE	High	Master Protein	Q14677	Clathrin interactor 1 OS=Homo sapiens GN=CLINT1 PE=1 SV=1	0.001	2.986	2	1	1	1	1	625	68.2	6.42	2.03	1
FALSE	High	Master Protein	P49257	Protein ERGIC-53 OS=Homo sapiens GN=LMAN1 PE=1 SV=2	0.001	2.984	6	1	1	1	1	510	57.5	6.77	2.53	1
FALSE	High	Master Protein	Q01780	Exosome component 10 OS=Homo sapiens GN=EXOSC10 PE=1 SV=2	0.001	2.983	1	1	1	1	1	885	100.8	8.46	0	1
FALSE	High	Master Protein	P00441	Superoxide dismutase [Cu-Zn] OS=Homo sapiens GN=SOD1 PE=1 SV=2	0.001	2.982	9	1	2	1	1	154	15.9	6.13	0	1
FALSE	High	Master Protein	Q9BW71	HIRA-interacting protein 3 OS=Homo sapiens GN=HIRIP3 PE=1 SV=3	0.001	2.972	1	1	1	1	1	556	61.9	8.54	1.79	1
FALSE	High	Master Protein	Q9Y2Y0	ADP-ribosylation factor-like protein 2-binding protein OS=Homo sapiens GN=ARL2BP PE=1 SV=1	0.001	2.967	9	1	1	1	1	163	18.8	4.35	0	1
FALSE	High	Master Protein	Q9NVV4	Poly(A) RNA polymerase, mitochondrial OS=Homo sapiens GN=MTPAP PE=1 SV=1	0.001	2.961	3	1	1	1	1	582	66.1	9.04	0	1
FALSE	High	Master Protein	Q9BZK7	F-box-like/WD repeat-containing protein TBL1XR1 OS=Homo sapiens GN=TBL1XR1 PE=1 SV=1	0.001	2.957	4	1	1	1	1	514	55.6	5.55	0	1
FALSE	High	Master Protein	Q13724	Mannosyl-oligosaccharide glucosidase OS=Homo sapiens GN=MOGS PE=1 SV=5	0.001	2.957	1	1	1	1	1	837	91.9	8.9	0	1
FALSE	High	Master Protein	P11166	Solute carrier family 2, facilitated glucose transporter member 1 OS=Homo sapiens GN=SLC2A1 PE=1 SV=2	0.001	2.95	2	1	2	1	1	492	54	8.72	0	1
FALSE	High	Master Protein	Q00341	Vigilin OS=Homo sapiens GN=HDLBP PE=1 SV=2	0.001	2.95	1	1	1	1	1	1268	141.4	6.87	0	1
FALSE	High	Master Protein	P20339	Ras-related protein Rab-5A OS=Homo sapiens GN=RAB5A PE=1 SV=2	0.001	2.944	16	2	2	1	1	215	23.6	8.15	0	2
FALSE	High	Master Protein	Q15631	Translin OS=Homo sapiens GN=TSN PE=1 SV=1	0.001	2.926	12	2	2	2	1	228	26.2	6.44	0	2
FALSE	High	Master Protein	Q9H4M9	EH domain-containing protein 1 OS=Homo sapiens GN=EHD1 PE=1 SV=2	0.001	2.919	3	1	1	1	1	534	60.6	6.83	0	1
FALSE	High	Master Protein	Q9NY93	Probable ATP-dependent RNA helicase DDX56 OS=Homo sapiens GN=DDX56 PE=1 SV=1	0.001	2.919	3	1	1	1	1	547	61.6	9.26	0	1
FALSE	High	Master Protein	O00429	Dynamin-1-like protein OS=Homo sapiens GN=DNM1L PE=1 SV=2	0.001	2.913	2	1	1	1	1	736	81.8	6.81	0	1
FALSE	High	Master Protein	Q5U5X0	Complex III assembly factor LYRM7 OS=Homo sapiens GN=LYRM7 PE=1 SV=1	0.001	2.91	17	1	1	1	1	104	11.9	9.66	0	1
FALSE	High	Master Protein	Q7Z2Z2	Elongation factor-like GTPase 1 OS=Homo sapiens GN=EFL1 PE=1 SV=2	0.001	2.886	1	1	1	1	1	1120	125.4	5.91	0	1
FALSE	High	Master Protein	Q9Y5X3	Sorting nexin-5 OS=Homo sapiens GN=SNX5 PE=1 SV=1	0.001	2.884	4	1	1	1	1	404	46.8	6.76	0	1
FALSE	High	Master Protein	Q8IX12	Cell division cycle and apoptosis regulator protein 1 OS=Homo sapiens GN=CCAR1 PE=1 SV=2	0.001	2.882	2	2	2	2	1	1150	132.7	5.76	0	2
FALSE	High	Master Protein	Q04206	Transcription factor p65 OS=Homo sapiens GN=RELA PE=1 SV=2	0.002	2.864	3	1	1	1	1	551	60.2	5.68	1.71	1
FALSE	High	Master Protein	O43815	Striatin OS=Homo sapiens GN=STRN PE=1 SV=4	0.002	2.864	2	1	1	1	1	780	86.1	5.27	0	1
FALSE	High	Master Protein	P61764	Syntaxin-binding protein 1 OS=Homo sapiens GN=STXBP1 PE=1 SV=1	0.002	2.863	3	1	1	1	1	594	67.5	6.96	0	1
FALSE	High	Master Protein	Q9UL25	Ras-related protein Rab-21 OS=Homo sapiens GN=RAB21 PE=1 SV=3	0.002	2.862	5	1	1	1	1	225	24.3	7.94	0	1
FALSE	High	Master Protein	Q12972	Nuclear inhibitor of protein phosphatase 1 OS=Homo sapiens GN=PPP1R8 PE=1 SV=2	0.002	2.86	6	1	1	1	1	351	38.5	7.37	0	1
FALSE	High	Master Protein	Q13427	Peptidyl-prolyl cis-trans isomerase G OS=Homo sapiens GN=PPIG PE=1 SV=2	0.002	2.86	2	1	1	1	1	754	88.6	10.29	0	1
FALSE	High	Master Protein	Q6P1N0	Coiled-coil and C2 domain-containing protein 1A OS=Homo sapiens GN=CC2D1A PE=1 SV=1	0.002	2.858	2	1	1	1	1	951	104	8.09	0	1
FALSE	High	Master Protein	Q5MIZ7	Serine/threonine-protein phosphatase 4 regulatory subunit 3B OS=Homo sapiens GN=PPP4R3B PE=1 SV=2	0.002	2.856	1	1	1	1	1	849	97.4	4.96	0	1
FALSE	High	Master Protein	P46976	Glycogenin-1 OS=Homo sapiens GN=GYG1 PE=1 SV=4	0.002	2.856	3	1	1	1	1	350	39.4	5.53	0	1
FALSE	High	Master Protein	Q9NZL4	Hsp70-binding protein 1 OS=Homo sapiens GN=HSPBP1 PE=1 SV=1	0.002	2.849	4	1	1	1	1	362	39.4	5.21	0	1
FALSE	High	Master Protein	Q9NUQ8	ATP-binding cassette sub-family F member 3 OS=Homo sapiens GN=ABCF3 PE=1 SV=2	0.002	2.843	3	1	1	1	1	709	79.7	6.34	0	1
FALSE	High	Master Protein	Q96L92	Sorting nexin-27 OS=Homo sapiens GN=SNX27 PE=1 SV=2	0.002	2.835	2	1	1	1	1	541	61.2	6.49	0	1
FALSE	High	Master Protein	O60826	Coiled-coil domain-containing protein 22 OS=Homo sapiens GN=CCDC22 PE=1 SV=1	0.002	2.833	2	1	1	1	1	627	70.7	6.74	0	1
FALSE	High	Master Protein	Q5QJE6	Deoxynucleotidyltransferase terminal-interacting protein 2 OS=Homo sapiens GN=DNTTIP2 PE=1 SV=2	0.002	2.818	2	1	1	1	1	756	84.4	6.16	0	1
FALSE	High	Master Protein	P15586	N-acetylglucosamine-6-sulfatase OS=Homo sapiens GN=GNS PE=1 SV=3	0.002	2.817	2	1	1	1	1	552	62	8.31	0	1
FALSE	High	Master Protein	P49247	Ribose-5-phosphate isomerase OS=Homo sapiens GN=RPIA PE=1 SV=3	0.002	2.816	3	1	1	1	1	311	33.2	8.54	2.02	1
FALSE	High	Master Protein	O95248	Myotubularin-related protein 5 OS=Homo sapiens GN=SBF1 PE=1 SV=3	0.002	2.815	1	1	1	1	1	1867	208.2	6.9	0	1
FALSE	High	Master Protein	Q9NRN7	L-aminoadipate-semialdehyde dehydrogenase-phosphopantetheinyl transferase OS=Homo sapiens GN=AASDHPPT PE=1 SV=2	0.002	2.814	3	1	1	1	1	309	35.8	6.8	1.71	1
FALSE	High	Master Protein	O75489	NADH dehydrogenase [ubiquinone] iron-sulfur protein 3, mitochondrial OS=Homo sapiens GN=NDUFS3 PE=1 SV=1	0.002	2.812	5	1	1	1	1	264	30.2	7.5	1.81	1
FALSE	High	Master Protein	Q9HD45	Transmembrane 9 superfamily member 3 OS=Homo sapiens GN=TM9SF3 PE=1 SV=2	0.002	2.811	2	1	1	1	1	589	67.8	7.21	0	1
FALSE	High	Master Protein	Q08188	Protein-glutamine gamma-glutamyltransferase E OS=Homo sapiens GN=TGM3 PE=1 SV=4	0.002	2.804	3	1	1	1	1	693	76.6	5.86	0	1
FALSE	High	Master Protein	O14972	Down syndrome critical region protein 3 OS=Homo sapiens GN=DSCR3 PE=2 SV=1	0.002	2.802	6	1	1	1	1	297	33	7.68	0	1
FALSE	High	Master Protein	Q9BW19	Kinesin-like protein KIFC1 OS=Homo sapiens GN=KIFC1 PE=1 SV=2	0.002	2.798	2	1	1	1	1	673	73.7	8.98	0	1
FALSE	High	Master Protein	O75351	Vacuolar protein sorting-associated protein 4B OS=Homo sapiens GN=VPS4B PE=1 SV=2	0.002	2.795	6	2	2	2	1	444	49.3	7.23	0	2
FALSE	High	Master Protein	Q9UNM6	26S proteasome non-ATPase regulatory subunit 13 OS=Homo sapiens GN=PSMD13 PE=1 SV=2	0.002	2.793	2	1	1	1	1	376	42.9	5.81	2.19	1
FALSE	High	Master Protein	Q9Y285	Phenylalanine--tRNA ligase alpha subunit OS=Homo sapiens GN=FARSA PE=1 SV=3	0.002	2.793	3	1	2	1	1	508	57.5	7.8	3.45	1
FALSE	High	Master Protein	Q9Y6D9	Mitotic spindle assembly checkpoint protein MAD1 OS=Homo sapiens GN=MAD1L1 PE=1 SV=2	0.002	2.789	2	1	1	1	1	718	83	5.92	0	1
FALSE	High	Master Protein	Q8WWQ0	PH-interacting protein OS=Homo sapiens GN=PHIP PE=1 SV=2	0.002	2.788	1	1	1	1	1	1821	206.6	8.85	0	1
FALSE	High	Master Protein	P40222	Alpha-taxilin OS=Homo sapiens GN=TXLNA PE=1 SV=3	0.002	2.786	5	1	1	1	1	546	61.9	6.52	0	1
FALSE	High	Master Protein	C9JLW8	Mapk-regulated corepressor-interacting protein 1 OS=Homo sapiens GN=MCRIP1 PE=1 SV=1	0.002	2.78	11	1	1	1	1	97	10.9	9.41	0	1
FALSE	High	Master Protein	Q8N6R0	Methyltransferase-like protein 13 OS=Homo sapiens GN=METTL13 PE=1 SV=1	0.002	2.778	2	1	1	1	1	699	78.7	6.73	0	1
FALSE	High	Master Protein	Q8N8A6	ATP-dependent RNA helicase DDX51 OS=Homo sapiens GN=DDX51 PE=1 SV=3	0.002	2.778	3	1	1	1	1	666	72.4	8.16	0	1
FALSE	High	Master Protein	Q9Y3U8	60S ribosomal protein L36 OS=Homo sapiens GN=RPL36 PE=1 SV=3	0.002	2.767	10	1	2	1	1	105	12.2	11.59	3.95	1
FALSE	High	Master Protein	Q9Y697	Cysteine desulfurase, mitochondrial OS=Homo sapiens GN=NFS1 PE=1 SV=3	0.002	2.765	3	1	1	1	1	457	50.2	8.31	0	1
FALSE	High	Master Protein	P28288	ATP-binding cassette sub-family D member 3 OS=Homo sapiens GN=ABCD3 PE=1 SV=1	0.002	2.763	2	1	1	1	1	659	75.4	9.36	0	1
FALSE	High	Master Protein	P51572	B-cell receptor-associated protein 31 OS=Homo sapiens GN=BCAP31 PE=1 SV=3	0.002	2.762	6	1	1	1	1	246	28	8.44	0	1
FALSE	High	Master Protein	Q96EP5	DAZ-associated protein 1 OS=Homo sapiens GN=DAZAP1 PE=1 SV=1	0.002	2.76	4	1	1	1	1	407	43.4	8.56	0	1
FALSE	High	Master Protein	Q8NBF2	NHL repeat-containing protein 2 OS=Homo sapiens GN=NHLRC2 PE=1 SV=1	0.002	2.758	2	1	1	1	1	726	79.4	5.55	1.71	1
FALSE	High	Master Protein	P50454	Serpin H1 OS=Homo sapiens GN=SERPINH1 PE=1 SV=2	0.002	2.757	4	1	1	1	1	418	46.4	8.69	0	1
FALSE	High	Master Protein	O43719	HIV Tat-specific factor 1 OS=Homo sapiens GN=HTATSF1 PE=1 SV=1	0.002	2.752	2	1	1	1	1	755	85.8	4.4	0	1
FALSE	High	Master Protein	Q9NYH9	U3 small nucleolar RNA-associated protein 6 homolog OS=Homo sapiens GN=UTP6 PE=2 SV=2	0.002	2.751	3	1	1	1	1	597	70.1	7.28	0	1
FALSE	High	Master Protein	Q03518	Antigen peptide transporter 1 OS=Homo sapiens GN=TAP1 PE=1 SV=2	0.002	2.749	2	1	1	1	1	808	87.2	8.02	0	1
FALSE	High	Master Protein	Q9BRP8	Partner of Y14 and mago OS=Homo sapiens GN=PYM1 PE=1 SV=1	0.002	2.744	8	1	1	1	1	204	22.6	9.45	0	1
FALSE	High	Master Protein	Q96RE7	Nucleus accumbens-associated protein 1 OS=Homo sapiens GN=NACC1 PE=1 SV=1	0.002	2.744	2	1	1	1	1	527	57.2	5.74	0	1
FALSE	High	Master Protein	P11279	Lysosome-associated membrane glycoprotein 1 OS=Homo sapiens GN=LAMP1 PE=1 SV=3	0.003	2.741	2	1	1	1	1	417	44.9	8.75	0	1
FALSE	High	Master Protein	Q8WW12	PEST proteolytic signal-containing nuclear protein OS=Homo sapiens GN=PCNP PE=1 SV=2	0.003	2.739	8	1	1	1	1	178	18.9	7.49	0	1
FALSE	High	Master Protein	P82663	28S ribosomal protein S25, mitochondrial OS=Homo sapiens GN=MRPS25 PE=1 SV=1	0.003	2.739	12	1	1	1	1	173	20.1	8.82	0	1
FALSE	High	Master Protein	Q6PL24	Protein TMED8 OS=Homo sapiens GN=TMED8 PE=1 SV=1	0.003	2.736	3	1	1	1	1	325	35.7	4.74	0	1
FALSE	High	Master Protein	P06132	Uroporphyrinogen decarboxylase OS=Homo sapiens GN=UROD PE=1 SV=2	0.003	2.735	3	1	1	1	1	367	40.8	6.14	0	1
FALSE	High	Master Protein	Q12888	Tumor suppressor p53-binding protein 1 OS=Homo sapiens GN=TP53BP1 PE=1 SV=2	0.003	2.729	1	1	1	1	1	1972	213.4	4.7	0	1
FALSE	High	Master Protein	P61916	Epididymal secretory protein E1 OS=Homo sapiens GN=NPC2 PE=1 SV=1	0.003	2.727	11	1	1	1	1	151	16.6	7.65	0	1
FALSE	High	Master Protein	P57740	Nuclear pore complex protein Nup107 OS=Homo sapiens GN=NUP107 PE=1 SV=1	0.003	2.727	1	1	1	1	1	925	106.3	5.43	0	1
FALSE	High	Master Protein	P48047	ATP synthase subunit O, mitochondrial OS=Homo sapiens GN=ATP5O PE=1 SV=1	0.003	2.725	7	1	1	1	1	213	23.3	9.96	0	1
FALSE	High	Master Protein	O00231	26S proteasome non-ATPase regulatory subunit 11 OS=Homo sapiens GN=PSMD11 PE=1 SV=3	0.003	2.723	3	1	1	1	1	422	47.4	6.48	0	1
FALSE	High	Master Protein	O43678	NADH dehydrogenase [ubiquinone] 1 alpha subcomplex subunit 2 OS=Homo sapiens GN=NDUFA2 PE=1 SV=3	0.003	2.721	21	1	1	1	1	99	10.9	9.57	0	1
FALSE	High	Master Protein	P35659	Protein DEK OS=Homo sapiens GN=DEK PE=1 SV=1	0.003	2.717	3	1	2	1	1	375	42.6	8.56	0	1
FALSE	High	Master Protein	Q9UGV2	Protein NDRG3 OS=Homo sapiens GN=NDRG3 PE=1 SV=2	0.003	2.717	7	2	2	2	1	375	41.4	5.31	0	2
FALSE	High	Master Protein	Q86VS8	Protein Hook homolog 3 OS=Homo sapiens GN=HOOK3 PE=1 SV=2	0.003	2.715	2	1	1	1	1	718	83.1	5.17	1.62	1
FALSE	High	Master Protein	Q96CX2	BTB/POZ domain-containing protein KCTD12 OS=Homo sapiens GN=KCTD12 PE=1 SV=1	0.003	2.711	4	1	1	1	1	325	35.7	5.64	0	1
FALSE	High	Master Protein	Q9Y3P8	Signaling threshold-regulating transmembrane adapter 1 OS=Homo sapiens GN=SIT1 PE=1 SV=1	0.003	2.701	10	1	1	1	1	196	21.1	6.3	0	1
FALSE	High	Master Protein	P63279	SUMO-conjugating enzyme UBC9 OS=Homo sapiens GN=UBE2I PE=1 SV=1	0.003	2.7	8	1	1	1	1	158	18	8.66	0	1
FALSE	High	Master Protein	Q13576	Ras GTPase-activating-like protein IQGAP2 OS=Homo sapiens GN=IQGAP2 PE=1 SV=4	0.003	2.696	1	1	1	1	1	1575	180.5	5.64	0	1
FALSE	High	Master Protein	Q9H4E7	Differentially expressed in FDCP 6 homolog OS=Homo sapiens GN=DEF6 PE=1 SV=1	0.003	2.694	2	1	1	1	1	631	73.9	6.05	2.07	1
FALSE	High	Master Protein	Q6P1J9	Parafibromin OS=Homo sapiens GN=CDC73 PE=1 SV=1	0.003	2.693	2	1	1	1	1	531	60.5	9.61	0	1
FALSE	High	Master Protein	P27361	Mitogen-activated protein kinase 3 OS=Homo sapiens GN=MAPK3 PE=1 SV=4	0.003	2.693	4	1	1	1	1	379	43.1	6.74	0	1
FALSE	High	Master Protein	O95218	Zinc finger Ran-binding domain-containing protein 2 OS=Homo sapiens GN=ZRANB2 PE=1 SV=2	0.003	2.687	4	1	1	1	1	330	37.4	10.01	0	1
FALSE	High	Master Protein	P13612	Integrin alpha-4 OS=Homo sapiens GN=ITGA4 PE=1 SV=3	0.003	2.686	2	1	1	1	1	1032	114.8	6.48	0	1
FALSE	High	Master Protein	Q96H79	Zinc finger CCCH-type antiviral protein 1-like OS=Homo sapiens GN=ZC3HAV1L PE=1 SV=2	0.003	2.68	8	1	2	1	1	300	32.9	8.13	0	1
FALSE	High	Master Protein	P20936	Ras GTPase-activating protein 1 OS=Homo sapiens GN=RASA1 PE=1 SV=1	0.003	2.671	1	1	1	1	1	1047	116.3	6.54	0	1
FALSE	High	Master Protein	O60828	Polyglutamine-binding protein 1 OS=Homo sapiens GN=PQBP1 PE=1 SV=1	0.003	2.666	9	1	1	1	1	265	30.5	6.33	0	1
FALSE	High	Master Protein	P62495	Eukaryotic peptide chain release factor subunit 1 OS=Homo sapiens GN=ETF1 PE=1 SV=3	0.003	2.659	6	1	1	1	1	437	49	5.71	0	1
FALSE	High	Master Protein	O60256	Phosphoribosyl pyrophosphate synthase-associated protein 2 OS=Homo sapiens GN=PRPSAP2 PE=1 SV=1	0.003	2.657	4	1	1	1	1	369	40.9	7.44	2.06	1
FALSE	High	Master Protein	Q9UBV2	Protein sel-1 homolog 1 OS=Homo sapiens GN=SEL1L PE=1 SV=3	0.003	2.655	3	1	1	1	1	794	88.7	5.39	0	1
FALSE	High	Master Protein	P08559	Pyruvate dehydrogenase E1 component subunit alpha, somatic form, mitochondrial OS=Homo sapiens GN=PDHA1 PE=1 SV=3	0.003	2.642	3	1	1	1	1	390	43.3	8.06	0	1
FALSE	High	Master Protein	Q96BM9	ADP-ribosylation factor-like protein 8A OS=Homo sapiens GN=ARL8A PE=1 SV=1	0.003	2.637	5	1	1	1	1	186	21.4	7.77	0	1
FALSE	High	Master Protein	Q9Y3B2	Exosome complex component CSL4 OS=Homo sapiens GN=EXOSC1 PE=1 SV=1	0.003	2.616	8	1	1	1	1	195	21.4	8.24	1.61	1
FALSE	High	Master Protein	Q96CT7	Coiled-coil domain-containing protein 124 OS=Homo sapiens GN=CCDC124 PE=1 SV=1	0.003	2.61	6	1	1	1	1	223	25.8	9.54	0	1
FALSE	High	Master Protein	Q9Y3C8	Ubiquitin-fold modifier-conjugating enzyme 1 OS=Homo sapiens GN=UFC1 PE=1 SV=3	0.003	2.608	5	1	1	1	1	167	19.4	7.4	1.97	1
FALSE	High	Master Protein	Q70J99	Protein unc-13 homolog D OS=Homo sapiens GN=UNC13D PE=1 SV=1	0.003	2.605	2	1	1	1	1	1090	123.2	6.65	0	1
FALSE	High	Master Protein	P36507	Dual specificity mitogen-activated protein kinase kinase 2 OS=Homo sapiens GN=MAP2K2 PE=1 SV=1	0.003	2.594	4	1	1	1	1	400	44.4	6.55	0	1
FALSE	High	Master Protein	O60508	Pre-mRNA-processing factor 17 OS=Homo sapiens GN=CDC40 PE=1 SV=1	0.003	2.586	4	1	1	1	1	579	65.5	7.06	0	1
FALSE	High	Master Protein	Q9Y608	Leucine-rich repeat flightless-interacting protein 2 OS=Homo sapiens GN=LRRFIP2 PE=1 SV=1	0.003	2.585	2	1	1	1	1	721	82.1	6.95	0	1
FALSE	High	Master Protein	Q13630	GDP-L-fucose synthase OS=Homo sapiens GN=TSTA3 PE=1 SV=1	0.003	2.581	4	1	1	1	1	321	35.9	6.6	0	1
FALSE	High	Master Protein	P45954	Short/branched chain specific acyl-CoA dehydrogenase, mitochondrial OS=Homo sapiens GN=ACADSB PE=1 SV=1	0.003	2.573	3	1	1	1	1	432	47.5	6.99	0	1
FALSE	High	Master Protein	Q9NPF4	Probable tRNA N6-adenosine threonylcarbamoyltransferase OS=Homo sapiens GN=OSGEP PE=1 SV=1	0.003	2.564	5	1	1	1	1	335	36.4	6.35	0	1
FALSE	High	Master Protein	Q8N567	Zinc finger CCHC domain-containing protein 9 OS=Homo sapiens GN=ZCCHC9 PE=1 SV=2	0.003	2.562	4	1	1	1	1	271	30.5	9.17	0	1
FALSE	High	Master Protein	P43490	Nicotinamide phosphoribosyltransferase OS=Homo sapiens GN=NAMPT PE=1 SV=1	0.003	2.55	2	1	1	1	1	491	55.5	7.15	0	1
FALSE	High	Master Protein	P11171	Protein 4.1 OS=Homo sapiens GN=EPB41 PE=1 SV=4	0.003	2.543	2	1	1	1	1	864	97	5.58	0	1
FALSE	High	Master Protein	Q9UBQ0	Vacuolar protein sorting-associated protein 29 OS=Homo sapiens GN=VPS29 PE=1 SV=1	0.003	2.541	7	1	2	1	1	182	20.5	6.79	0	1
FALSE	High	Master Protein	Q9BUA3	Uncharacterized protein C11orf84 OS=Homo sapiens GN=C11orf84 PE=1 SV=3	0.003	2.541	2	1	1	1	1	381	41	5.01	0	1
FALSE	High	Master Protein	Q9Y6Y8	SEC23-interacting protein OS=Homo sapiens GN=SEC23IP PE=1 SV=1	0.003	2.536	3	1	1	1	1	1000	111	5.54	0	1
FALSE	High	Master Protein	Q9H4A3	Serine/threonine-protein kinase WNK1 OS=Homo sapiens GN=WNK1 PE=1 SV=2	0.003	2.535	1	2	2	2	1	2382	250.6	6.34	0	2
FALSE	High	Master Protein	Q96I25	Splicing factor 45 OS=Homo sapiens GN=RBM17 PE=1 SV=1	0.003	2.527	3	1	1	1	1	401	44.9	5.97	0	1
FALSE	High	Master Protein	Q15004	PCNA-associated factor OS=Homo sapiens GN=PCLAF PE=1 SV=1	0.003	2.524	17	1	1	1	1	111	12	9.83	0	1
FALSE	High	Master Protein	P35080	Profilin-2 OS=Homo sapiens GN=PFN2 PE=1 SV=3	0.003	2.519	10	1	1	1	1	140	15	6.99	0	1
FALSE	High	Master Protein	Q9NR28	Diablo homolog, mitochondrial OS=Homo sapiens GN=DIABLO PE=1 SV=1	0.003	2.512	8	1	1	1	1	239	27.1	5.9	0	1
FALSE	High	Master Protein	P25098	Beta-adrenergic receptor kinase 1 OS=Homo sapiens GN=GRK2 PE=1 SV=2	0.003	2.505	1	1	1	1	1	689	79.5	7.28	0	1
FALSE	High	Master Protein	P55212	Caspase-6 OS=Homo sapiens GN=CASP6 PE=1 SV=2	0.003	2.499	3	1	1	1	1	293	33.3	6.93	0	1
FALSE	High	Master Protein	Q9P015	39S ribosomal protein L15, mitochondrial OS=Homo sapiens GN=MRPL15 PE=1 SV=1	0.003	2.498	6	1	1	1	1	296	33.4	10.01	0	1
FALSE	High	Master Protein	Q8NI36	WD repeat-containing protein 36 OS=Homo sapiens GN=WDR36 PE=1 SV=1	0.003	2.497	1	1	1	1	1	951	105.3	7.53	1.62	1
FALSE	High	Master Protein	P04004	Vitronectin OS=Homo sapiens GN=VTN PE=1 SV=1	0.003	2.491	3	1	1	1	1	478	54.3	5.8	0	1
FALSE	High	Master Protein	Q9HC52	Chromobox protein homolog 8 OS=Homo sapiens GN=CBX8 PE=1 SV=3	0.003	2.491	6	1	1	1	1	389	43.4	9.91	0	1
FALSE	High	Master Protein	Q9BV44	THUMP domain-containing protein 3 OS=Homo sapiens GN=THUMPD3 PE=1 SV=1	0.003	2.49	2	1	1	1	1	507	57	6.37	0	1
FALSE	High	Master Protein	Q9NTI5	Sister chromatid cohesion protein PDS5 homolog B OS=Homo sapiens GN=PDS5B PE=1 SV=1	0.003	2.484	1	1	1	1	1	1447	164.6	8.47	0	1
FALSE	High	Master Protein	P08574	Cytochrome c1, heme protein, mitochondrial OS=Homo sapiens GN=CYC1 PE=1 SV=3	0.003	2.483	5	1	1	1	1	325	35.4	9	0	1
FALSE	High	Master Protein	Q9Y5Q8	General transcription factor 3C polypeptide 5 OS=Homo sapiens GN=GTF3C5 PE=1 SV=2	0.003	2.476	3	1	1	1	1	519	59.5	6.9	0	1
FALSE	High	Master Protein	Q96HA1	Nuclear envelope pore membrane protein POM 121 OS=Homo sapiens GN=POM121 PE=1 SV=2	0.003	2.47	2	1	1	1	1	1249	127.6	10.56	0	1
FALSE	High	Master Protein	Q96EV2	RNA-binding protein 33 OS=Homo sapiens GN=RBM33 PE=1 SV=3	0.003	2.465	2	1	1	1	1	1170	129.9	6.93	0	1
FALSE	High	Master Protein	Q92878	DNA repair protein RAD50 OS=Homo sapiens GN=RAD50 PE=1 SV=1	0.003	2.463	1	1	1	1	1	1312	153.8	6.89	0	1
FALSE	High	Master Protein	O75874	Isocitrate dehydrogenase [NADP] cytoplasmic OS=Homo sapiens GN=IDH1 PE=1 SV=2	0.003	2.46	6	2	2	2	1	414	46.6	7.01	0	2
FALSE	High	Master Protein	Q96S55	ATPase WRNIP1 OS=Homo sapiens GN=WRNIP1 PE=1 SV=2	0.003	2.457	1	1	1	1	1	665	72.1	6.1	0	1
FALSE	High	Master Protein	Q9Y282	Endoplasmic reticulum-Golgi intermediate compartment protein 3 OS=Homo sapiens GN=ERGIC3 PE=1 SV=1	0.003	2.457	4	1	1	1	1	383	43.2	6.06	0	1
FALSE	High	Master Protein	Q14C86	GTPase-activating protein and VPS9 domain-containing protein 1 OS=Homo sapiens GN=GAPVD1 PE=1 SV=2	0.003	2.453	1	1	1	1	1	1478	164.9	5.22	0	1
FALSE	High	Master Protein	Q9NTK5	Obg-like ATPase 1 OS=Homo sapiens GN=OLA1 PE=1 SV=2	0.003	2.445	3	1	1	1	1	396	44.7	7.81	0	1
FALSE	High	Master Protein	Q4G176	Acyl-CoA synthetase family member 3, mitochondrial OS=Homo sapiens GN=ACSF3 PE=1 SV=3	0.003	2.442	3	1	1	1	1	576	64.1	8.37	0	1
FALSE	High	Master Protein	O95801	Tetratricopeptide repeat protein 4 OS=Homo sapiens GN=TTC4 PE=1 SV=3	0.003	2.44	3	1	1	1	1	387	44.7	5.6	0	1
FALSE	High	Master Protein	P11233	Ras-related protein Ral-A OS=Homo sapiens GN=RALA PE=1 SV=1	0.003	2.44	7	1	1	1	1	206	23.6	7.11	0	1
FALSE	High	Master Protein	Q9NP61	ADP-ribosylation factor GTPase-activating protein 3 OS=Homo sapiens GN=ARFGAP3 PE=1 SV=1	0.003	2.434	3	1	1	1	1	516	56.9	7.36	0	1
FALSE	High	Master Protein	Q8NBJ7	Sulfatase-modifying factor 2 OS=Homo sapiens GN=SUMF2 PE=1 SV=2	0.003	2.429	5	1	1	1	1	301	33.8	8	1.71	1
FALSE	High	Master Protein	Q658Y4	Protein FAM91A1 OS=Homo sapiens GN=FAM91A1 PE=1 SV=3	0.003	2.417	2	1	1	1	1	838	93.9	6.39	0	1
FALSE	High	Master Protein	Q9NTJ5	Phosphatidylinositide phosphatase SAC1 OS=Homo sapiens GN=SACM1L PE=1 SV=2	0.003	2.414	2	1	1	1	1	587	66.9	7.12	0	1
FALSE	High	Master Protein	P36776	Lon protease homolog, mitochondrial OS=Homo sapiens GN=LONP1 PE=1 SV=2	0.003	2.412	1	1	1	1	1	959	106.4	6.39	0	1
FALSE	High	Master Protein	Q9BPW8	Protein NipSnap homolog 1 OS=Homo sapiens GN=NIPSNAP1 PE=1 SV=1	0.003	2.402	3	1	1	1	1	284	33.3	9.31	0	1
FALSE	High	Master Protein	Q9HAF1	Chromatin modification-related protein MEAF6 OS=Homo sapiens GN=MEAF6 PE=1 SV=1	0.003	2.398	12	1	1	1	1	191	21.6	9.32	0	1
FALSE	High	Master Protein	O14646	Chromodomain-helicase-DNA-binding protein 1 OS=Homo sapiens GN=CHD1 PE=1 SV=2	0.003	2.397	1	1	1	1	1	1710	196.6	7.14	0	1
FALSE	High	Master Protein	P07858	Cathepsin B OS=Homo sapiens GN=CTSB PE=1 SV=3	0.003	2.377	3	1	1	1	1	339	37.8	6.3	1.73	1
FALSE	High	Master Protein	P15927	Replication protein A 32 kDa subunit OS=Homo sapiens GN=RPA2 PE=1 SV=1	0.003	2.375	8	1	2	1	1	270	29.2	6.15	0	1
FALSE	High	Master Protein	Q9H2M9	Rab3 GTPase-activating protein non-catalytic subunit OS=Homo sapiens GN=RAB3GAP2 PE=1 SV=1	0.003	2.362	1	1	1	1	1	1393	155.9	5.62	0	1
FALSE	High	Master Protein	O43670	BUB3-interacting and GLEBS motif-containing protein ZNF207 OS=Homo sapiens GN=ZNF207 PE=1 SV=1	0.003	2.353	3	1	1	1	1	478	50.7	9.1	0	1
FALSE	High	Master Protein	O43491	Band 4.1-like protein 2 OS=Homo sapiens GN=EPB41L2 PE=1 SV=1	0.003	2.345	1	1	1	1	1	1005	112.5	5.44	1.79	1
FALSE	High	Master Protein	Q8NEZ5	F-box only protein 22 OS=Homo sapiens GN=FBXO22 PE=1 SV=1	0.003	2.345	2	1	1	1	1	403	44.5	7.03	0	1
FALSE	High	Master Protein	Q04760	Lactoylglutathione lyase OS=Homo sapiens GN=GLO1 PE=1 SV=4	0.003	2.341	4	1	1	1	1	184	20.8	5.31	0	1
FALSE	High	Master Protein	Q99733	Nucleosome assembly protein 1-like 4 OS=Homo sapiens GN=NAP1L4 PE=1 SV=1	0.003	2.339	7	1	1	1	1	375	42.8	4.69	0	1
FALSE	High	Master Protein	O14787	Transportin-2 OS=Homo sapiens GN=TNPO2 PE=1 SV=3	0.003	2.332	2	1	1	1	1	897	101.3	5.01	0	1
FALSE	High	Master Protein	Q96HC4	PDZ and LIM domain protein 5 OS=Homo sapiens GN=PDLIM5 PE=1 SV=5	0.003	2.33	3	1	1	1	1	596	63.9	8.21	0	1
FALSE	High	Master Protein	Q96G23	Ceramide synthase 2 OS=Homo sapiens GN=CERS2 PE=1 SV=1	0.003	2.322	2	1	1	1	1	380	44.8	8.98	0	1
FALSE	High	Master Protein	Q9UNS2	COP9 signalosome complex subunit 3 OS=Homo sapiens GN=COPS3 PE=1 SV=3	0.003	2.315	4	1	1	1	1	423	47.8	6.65	0	1
FALSE	High	Master Protein	P60520	Gamma-aminobutyric acid receptor-associated protein-like 2 OS=Homo sapiens GN=GABARAPL2 PE=1 SV=1	0.003	2.312	7	1	2	1	1	117	13.7	8.1	0	1
FALSE	High	Master Protein	Q15027	Arf-GAP with coiled-coil, ANK repeat and PH domain-containing protein 1 OS=Homo sapiens GN=ACAP1 PE=1 SV=1	0.003	2.294	2	1	1	1	1	740	81.5	7.66	0	1
FALSE	High	Master Protein	Q969M7	NEDD8-conjugating enzyme UBE2F OS=Homo sapiens GN=UBE2F PE=1 SV=1	0.003	2.287	8	1	1	1	1	185	21.1	6.79	0	1
FALSE	High	Master Protein	Q96RS6	NudC domain-containing protein 1 OS=Homo sapiens GN=NUDCD1 PE=1 SV=2	0.003	2.287	1	1	1	1	1	583	66.7	5.11	0	1
FALSE	High	Master Protein	Q13505	Metaxin-1 OS=Homo sapiens GN=MTX1 PE=1 SV=2	0.003	2.283	3	1	1	1	1	466	51.4	9.79	0	1
FALSE	High	Master Protein	Q9UI08	Ena/VASP-like protein OS=Homo sapiens GN=EVL PE=1 SV=2	0.003	2.276	3	1	1	1	1	416	44.6	8.84	0	1
FALSE	High	Master Protein	Q7L2E3	Putative ATP-dependent RNA helicase DHX30 OS=Homo sapiens GN=DHX30 PE=1 SV=1	0.003	2.27	1	1	1	1	1	1194	133.9	8.78	0	1
FALSE	High	Master Protein	O75694	Nuclear pore complex protein Nup155 OS=Homo sapiens GN=NUP155 PE=1 SV=1	0.003	2.268	1	1	1	1	1	1391	155.1	6.16	0	1
FALSE	High	Master Protein	O60231	Putative pre-mRNA-splicing factor ATP-dependent RNA helicase DHX16 OS=Homo sapiens GN=DHX16 PE=1 SV=2	0.003	2.258	2	1	1	1	1	1041	119.2	6.8	0	1
FALSE	High	Master Protein	Q9NP79	Vacuolar protein sorting-associated protein VTA1 homolog OS=Homo sapiens GN=VTA1 PE=1 SV=1	0.003	2.252	3	1	1	1	1	307	33.9	6.29	0	1
FALSE	High	Master Protein	Q9NV56	MRG/MORF4L-binding protein OS=Homo sapiens GN=MRGBP PE=1 SV=1	0.003	2.245	6	1	1	1	1	204	22.4	5.83	0	1
FALSE	High	Master Protein	Q16650	T-box brain protein 1 OS=Homo sapiens GN=TBR1 PE=2 SV=1	0.003	2.232	2	1	1	1	1	682	74	7.33	1.69	1
FALSE	High	Master Protein	P56385	ATP synthase subunit e, mitochondrial OS=Homo sapiens GN=ATP5I PE=1 SV=2	0.003	2.226	14	1	1	1	1	69	7.9	9.35	0	1
FALSE	High	Master Protein	O75832	26S proteasome non-ATPase regulatory subunit 10 OS=Homo sapiens GN=PSMD10 PE=1 SV=1	0.003	2.223	5	1	1	1	1	226	24.4	6.1	0	1
FALSE	High	Master Protein	Q8TDD1	ATP-dependent RNA helicase DDX54 OS=Homo sapiens GN=DDX54 PE=1 SV=2	0.004	2.2	1	1	1	1	1	881	98.5	10.02	0	1
FALSE	High	Master Protein	Q9NY12	H/ACA ribonucleoprotein complex subunit 1 OS=Homo sapiens GN=GAR1 PE=1 SV=1	0.004	2.196	8	1	1	1	1	217	22.3	10.92	0	1
FALSE	High	Master Protein	P11498	Pyruvate carboxylase, mitochondrial OS=Homo sapiens GN=PC PE=1 SV=2	0.004	2.194	1	1	1	1	1	1178	129.6	6.84	0	1
FALSE	High	Master Protein	Q96JM3	Chromosome alignment-maintaining phosphoprotein 1 OS=Homo sapiens GN=CHAMP1 PE=1 SV=2	0.004	2.188	2	1	1	1	1	812	89	8.44	0	1
FALSE	High	Master Protein	P16150	Leukosialin OS=Homo sapiens GN=SPN PE=1 SV=1	0.004	2.184	3	1	1	1	1	400	40.3	5.1	0	1
FALSE	High	Master Protein	Q9NWB6	Arginine and glutamate-rich protein 1 OS=Homo sapiens GN=ARGLU1 PE=1 SV=1	0.004	2.181	3	1	1	1	1	273	33.2	10.35	0	1
FALSE	High	Master Protein	P20701	Integrin alpha-L OS=Homo sapiens GN=ITGAL PE=1 SV=3	0.004	2.151	2	1	1	1	1	1170	128.7	5.63	0	1
FALSE	High	Master Protein	Q96FV9	THO complex subunit 1 OS=Homo sapiens GN=THOC1 PE=1 SV=1	0.005	2.148	2	1	1	1	1	657	75.6	4.98	0	1
FALSE	High	Master Protein	Q9NVM9	Protein asunder homolog OS=Homo sapiens GN=ASUN PE=1 SV=2	0.005	2.144	2	1	1	1	1	706	80.2	6.7	0	1
FALSE	High	Master Protein	O00273	DNA fragmentation factor subunit alpha OS=Homo sapiens GN=DFFA PE=1 SV=1	0.005	2.14	4	1	1	1	1	331	36.5	4.79	0	1
FALSE	High	Master Protein	O95865	N(G),N(G)-dimethylarginine dimethylaminohydrolase 2 OS=Homo sapiens GN=DDAH2 PE=1 SV=1	0.005	2.135	6	1	1	1	1	285	29.6	6.01	0	1
FALSE	High	Master Protein	P61011	Signal recognition particle 54 kDa protein OS=Homo sapiens GN=SRP54 PE=1 SV=1	0.005	2.134	2	1	1	1	1	504	55.7	8.75	0	1
FALSE	High	Master Protein	O15160	DNA-directed RNA polymerases I and III subunit RPAC1 OS=Homo sapiens GN=POLR1C PE=1 SV=1	0.005	2.129	3	1	1	1	1	346	39.2	5.5	0	1
FALSE	High	Master Protein	O43617	Trafficking protein particle complex subunit 3 OS=Homo sapiens GN=TRAPPC3 PE=1 SV=1	0.005	2.12	8	1	1	1	1	180	20.3	4.96	0	1
FALSE	High	Master Protein	Q96BW5	Phosphotriesterase-related protein OS=Homo sapiens GN=PTER PE=1 SV=1	0.005	2.108	5	1	1	1	1	349	39	6.52	0	1
FALSE	High	Master Protein	Q96EE3	Nucleoporin SEH1 OS=Homo sapiens GN=SEH1L PE=1 SV=3	0.005	2.099	4	1	1	1	1	360	39.6	8.09	0	1
FALSE	High	Master Protein	Q7L273	BTB/POZ domain-containing protein KCTD9 OS=Homo sapiens GN=KCTD9 PE=1 SV=1	0.005	2.093	4	1	1	1	1	389	42.5	6.37	0	1
FALSE	High	Master Protein	Q01826	DNA-binding protein SATB1 OS=Homo sapiens GN=SATB1 PE=1 SV=1	0.005	2.091	3	1	1	1	1	763	85.9	6.54	0	1
FALSE	High	Master Protein	Q14444	Caprin-1 OS=Homo sapiens GN=CAPRIN1 PE=1 SV=2	0.005	2.082	2	1	1	1	1	709	78.3	5.25	0	1
FALSE	High	Master Protein	P07766	T-cell surface glycoprotein CD3 epsilon chain OS=Homo sapiens GN=CD3E PE=1 SV=2	0.005	2.073	7	1	1	1	1	207	23.1	6.76	0	1
FALSE	High	Master Protein	P05204	Non-histone chromosomal protein HMG-17 OS=Homo sapiens GN=HMGN2 PE=1 SV=3	0.005	2.061	17	1	1	1	1	90	9.4	9.99	0	1
FALSE	High	Master Protein	P52594	Arf-GAP domain and FG repeat-containing protein 1 OS=Homo sapiens GN=AGFG1 PE=1 SV=2	0.006	2.053	4	1	1	1	1	562	58.2	8.63	0	1
FALSE	High	Master Protein	P51648	Fatty aldehyde dehydrogenase OS=Homo sapiens GN=ALDH3A2 PE=1 SV=1	0.006	2.051	3	1	1	1	1	485	54.8	7.88	0	1
FALSE	High	Master Protein	Q96QD9	UAP56-interacting factor OS=Homo sapiens GN=FYTTD1 PE=1 SV=3	0.006	2.035	3	1	1	1	1	318	35.8	11.78	0	1
FALSE	High	Master Protein	Q92797	Symplekin OS=Homo sapiens GN=SYMPK PE=1 SV=2	0.006	2.034	1	1	1	1	1	1274	141.1	6.13	0	1
FALSE	High	Master Protein	O75312	Zinc finger protein ZPR1 OS=Homo sapiens GN=ZPR1 PE=1 SV=1	0.006	2.022	3	1	1	1	1	459	50.9	4.73	0	1
FALSE	High	Master Protein	Q8TD19	Serine/threonine-protein kinase Nek9 OS=Homo sapiens GN=NEK9 PE=1 SV=2	0.007	2.017	1	1	1	1	1	979	107.1	5.74	0	1
FALSE	High	Master Protein	P23743	Diacylglycerol kinase alpha OS=Homo sapiens GN=DGKA PE=1 SV=3	0.007	1.98	1	1	1	1	1	735	82.6	6.73	0	1
FALSE	High	Master Protein	P48449	Lanosterol synthase OS=Homo sapiens GN=LSS PE=1 SV=1	0.007	1.974	1	1	1	1	1	732	83.3	6.61	0	1
FALSE	High	Master Protein	Q14789	Golgin subfamily B member 1 OS=Homo sapiens GN=GOLGB1 PE=1 SV=2	0.007	1.966	0	1	1	1	1	3259	375.8	5	0	1
FALSE	High	Master Protein	Q9NVH1	DnaJ homolog subfamily C member 11 OS=Homo sapiens GN=DNAJC11 PE=1 SV=2	0.007	1.965	3	1	1	1	1	559	63.2	8.4	0	1
FALSE	High	Master Protein	P98179	RNA-binding protein 3 OS=Homo sapiens GN=RBM3 PE=1 SV=1	0.007	1.96	22	1	1	1	1	157	17.2	8.91	0	1
FALSE	High	Master Protein	Q8N9T8	Protein KRI1 homolog OS=Homo sapiens GN=KRI1 PE=1 SV=3	0.007	1.959	3	1	1	1	1	703	82.5	5.14	0	1
FALSE	High	Master Protein	Q9UG63	ATP-binding cassette sub-family F member 2 OS=Homo sapiens GN=ABCF2 PE=1 SV=2	0.008	1.955	2	1	1	1	1	623	71.2	7.37	0	1
FALSE	High	Master Protein	Q9UJU2	Lymphoid enhancer-binding factor 1 OS=Homo sapiens GN=LEF1 PE=1 SV=1	0.008	1.955	5	1	1	1	1	399	44.2	7.42	0	1
FALSE	High	Master Protein	Q9BZI7	Regulator of nonsense transcripts 3B OS=Homo sapiens GN=UPF3B PE=1 SV=1	0.008	1.948	2	1	1	1	1	483	57.7	9.48	0	1
FALSE	High	Master Protein	Q6ZSR9	Uncharacterized protein FLJ45252 OS=Homo sapiens PE=2 SV=2	0.008	1.942	5	1	1	1	1	355	38	5.26	0	1
FALSE	High	Master Protein	Q9H4L4	Sentrin-specific protease 3 OS=Homo sapiens GN=SENP3 PE=1 SV=2	0.008	1.94	3	1	1	1	1	574	65	8.56	0	1
FALSE	High	Master Protein	Q12846	Syntaxin-4 OS=Homo sapiens GN=STX4 PE=1 SV=2	0.008	1.924	6	1	1	1	1	297	34.2	6.28	0	1
FALSE	High	Master Protein	Q99543	DnaJ homolog subfamily C member 2 OS=Homo sapiens GN=DNAJC2 PE=1 SV=4	0.008	1.919	2	1	1	1	1	621	72	8.7	0	1
FALSE	High	Master Protein	Q92947	Glutaryl-CoA dehydrogenase, mitochondrial OS=Homo sapiens GN=GCDH PE=1 SV=1	0.009	1.907	3	1	1	1	1	438	48.1	8.06	0	1
FALSE	High	Master Protein	P28062	Proteasome subunit beta type-8 OS=Homo sapiens GN=PSMB8 PE=1 SV=3	0.009	1.906	4	1	1	1	1	276	30.3	7.43	0	1
FALSE	High	Master Protein	Q12907	Vesicular integral-membrane protein VIP36 OS=Homo sapiens GN=LMAN2 PE=1 SV=1	0.009	1.89	3	1	1	1	1	356	40.2	6.95	0	1
FALSE	High	Master Protein	P23919	Thymidylate kinase OS=Homo sapiens GN=DTYMK PE=1 SV=4	0.009	1.888	5	1	1	1	1	212	23.8	8.27	1.87	1
FALSE	High	Master Protein	Q96T88	E3 ubiquitin-protein ligase UHRF1 OS=Homo sapiens GN=UHRF1 PE=1 SV=1	0.009	1.887	1	1	1	1	1	793	89.8	7.56	0	1
FALSE	High	Master Protein	Q8WUA2	Peptidyl-prolyl cis-trans isomerase-like 4 OS=Homo sapiens GN=PPIL4 PE=1 SV=1	0.009	1.886	3	1	1	1	1	492	57.2	5.92	0	1
FALSE	High	Master Protein	Q9Y6I4	Ubiquitin carboxyl-terminal hydrolase 3 OS=Homo sapiens GN=USP3 PE=1 SV=2	0.009	1.882	3	1	1	1	1	520	58.9	8.18	0	1
FALSE	High	Master Protein	P04181	Ornithine aminotransferase, mitochondrial OS=Homo sapiens GN=OAT PE=1 SV=1	0.009	1.874	3	1	1	1	1	439	48.5	7.03	0	1
FALSE	High	Master Protein	O14976	Cyclin-G-associated kinase OS=Homo sapiens GN=GAK PE=1 SV=2	0.009	1.865	1	1	1	1	1	1311	143.1	5.73	0	1
FALSE	High	Master Protein	Q9BXB4	Oxysterol-binding protein-related protein 11 OS=Homo sapiens GN=OSBPL11 PE=1 SV=2	0.009	1.864	2	1	1	1	1	747	83.6	7.06	0	1
FALSE	High	Master Protein	O75569	Interferon-inducible double-stranded RNA-dependent protein kinase activator A OS=Homo sapiens GN=PRKRA PE=1 SV=1	0.009	1.861	5	1	1	1	1	313	34.4	8.41	0	1
FALSE	High	Master Protein	O43402	ER membrane protein complex subunit 8 OS=Homo sapiens GN=EMC8 PE=1 SV=1	0.009	1.86	4	1	1	1	1	210	23.8	6.4	0	1
FALSE	High	Master Protein	Q8TCT9	Minor histocompatibility antigen H13 OS=Homo sapiens GN=HM13 PE=1 SV=1	0.009	1.859	6	1	1	1	1	377	41.5	6.43	0	1
FALSE	High	Master Protein	P30085	UMP-CMP kinase OS=Homo sapiens GN=CMPK1 PE=1 SV=3	0.009	1.852	4	1	1	1	1	196	22.2	5.57	0	1
FALSE	High	Master Protein	Q8TAT6	Nuclear protein localization protein 4 homolog OS=Homo sapiens GN=NPLOC4 PE=1 SV=3	0.009	1.844	2	1	1	1	1	608	68.1	6.38	0	1
FALSE	High	Master Protein	O43615	Mitochondrial import inner membrane translocase subunit TIM44 OS=Homo sapiens GN=TIMM44 PE=1 SV=2	0.009	1.841	3	1	1	1	1	452	51.3	8.32	0	1
FALSE	High	Master Protein	Q96P11	Probable 28S rRNA (cytosine-C(5))-methyltransferase OS=Homo sapiens GN=NSUN5 PE=1 SV=2	0.009	1.834	3	1	1	1	1	429	46.7	8.62	0	1
FALSE	High	Master Protein	O00629	Importin subunit alpha-3 OS=Homo sapiens GN=KPNA4 PE=1 SV=1	0.01	1.832	4	1	1	1	1	521	57.9	4.96	0	1
FALSE	High	Master Protein	Q8NAB2	Kelch repeat and BTB domain-containing protein 3 OS=Homo sapiens GN=KBTBD3 PE=2 SV=2	0.01	1.827	1	1	1	1	1	608	69.4	5.39	0	1
FALSE	High	Master Protein	O75525	KH domain-containing, RNA-binding, signal transduction-associated protein 3 OS=Homo sapiens GN=KHDRBS3 PE=1 SV=1	0.01	1.821	3	1	1	1	1	346	38.8	7.61	0	1
FALSE	High	Master Protein	P61769	Beta-2-microglobulin OS=Homo sapiens GN=B2M PE=1 SV=1	0.01	1.817	18	1	1	1	1	119	13.7	6.52	0	1

## Sheet: 500 cells SDS-BBS
Checked	Protein FDR Confidence: Combined	Master	Accession	Description	Exp. q-value: Combined	Sum PEP Score	Coverage [%]	# Peptides	# PSMs	# Unique Peptides	# Protein Groups	# AAs	MW [kDa]	calc. pI	Score Sequest HT: Sequest HT	# Peptides (by Search Engine): Sequest HT	Modifications
FALSE	High	Master Protein	P35579	Myosin-9 OS=Homo sapiens GN=MYH9 PE=1 SV=4	0	442.712	45	76	146	68	1	1960	226.4	5.6	258.25	76
FALSE	High	Master Protein	P21333	Filamin-A OS=Homo sapiens GN=FLNA PE=1 SV=4	0	380.981	44	70	116	68	1	2647	280.6	6.06	196.73	70
FALSE	High	Master Protein	Q13813	Spectrin alpha chain, non-erythrocytic 1 OS=Homo sapiens GN=SPTAN1 PE=1 SV=3	0	249.692	34	65	78	65	1	2472	284.4	5.35	78.13	65
FALSE	High	Master Protein	Q01082	Spectrin beta chain, non-erythrocytic 1 OS=Homo sapiens GN=SPTBN1 PE=1 SV=2	0	204.414	28	47	57	47	1	2364	274.4	5.57	69.13	47
FALSE	High	Master Protein	Q9Y490	Talin-1 OS=Homo sapiens GN=TLN1 PE=1 SV=3	0	250.288	33	45	58	45	1	2541	269.6	6.07	90.3	45
FALSE	High	Master Protein	Q00610	Clathrin heavy chain 1 OS=Homo sapiens GN=CLTC PE=1 SV=5	0	195.774	32	41	60	41	1	1675	191.5	5.69	96.46	41
FALSE	High	Master Protein	O75369	Filamin-B OS=Homo sapiens GN=FLNB PE=1 SV=2	0	190.502	29	43	47	41	1	2602	278	5.73	84.47	43
FALSE	High	Master Protein	P14618	Pyruvate kinase PKM OS=Homo sapiens GN=PKM PE=1 SV=4	0	281.298	68	35	117	35	1	531	57.9	7.84	276.12	35
FALSE	High	Master Protein	Q08211	ATP-dependent RNA helicase A OS=Homo sapiens GN=DHX9 PE=1 SV=4	0	174.934	36	33	58	33	1	1270	140.9	6.84	84.22	33
FALSE	High	Master Protein	P13639	Elongation factor 2 OS=Homo sapiens GN=EEF2 PE=1 SV=4	0	219.719	49	32	82	32	1	858	95.3	6.83	142.05	32
FALSE	High	Master Protein	P55072	Transitional endoplasmic reticulum ATPase OS=Homo sapiens GN=VCP PE=1 SV=4	0	151.023	58	30	51	30	1	806	89.3	5.26	87.09	30
FALSE	High	Master Protein	P22314	Ubiquitin-like modifier-activating enzyme 1 OS=Homo sapiens GN=UBA1 PE=1 SV=3	0	191.924	42	29	55	29	1	1058	117.8	5.76	105.36	29
FALSE	High	Master Protein	P04264	Keratin, type II cytoskeletal 1 OS=Homo sapiens GN=KRT1 PE=1 SV=6	0	252.988	48	33	134	29	1	644	66	8.12	311.28	33
FALSE	High	Master Protein	P34932	Heat shock 70 kDa protein 4 OS=Homo sapiens GN=HSPA4 PE=1 SV=4	0	123.336	48	29	37	28	1	840	94.3	5.19	51.77	29
FALSE	High	Master Protein	P10809	60 kDa heat shock protein, mitochondrial OS=Homo sapiens GN=HSPD1 PE=1 SV=2	0	251.442	61	28	123	28	1	573	61	5.87	221.63	28
FALSE	High	Master Protein	P13796	Plastin-2 OS=Homo sapiens GN=LCP1 PE=1 SV=6	0	217.58	59	31	97	28	1	627	70.2	5.43	183.89	31
FALSE	High	Master Protein	P08670	Vimentin OS=Homo sapiens GN=VIM PE=1 SV=4	0	183.218	56	27	61	27	1	466	53.6	5.12	107.82	27
FALSE	High	Master Protein	P08133	Annexin A6 OS=Homo sapiens GN=ANXA6 PE=1 SV=3	0	112.734	48	27	40	27	1	673	75.8	5.6	53.05	27
FALSE	High	Master Protein	P35527	Keratin, type I cytoskeletal 9 OS=Homo sapiens GN=KRT9 PE=1 SV=3	0	271.516	59	27	135	27	1	623	62	5.24	281.56	27
FALSE	High	Master Protein	P78527	DNA-dependent protein kinase catalytic subunit OS=Homo sapiens GN=PRKDC PE=1 SV=3	0	101.951	9	27	29	27	1	4128	468.8	7.12	37.85	27
FALSE	High	Master Protein	P08575	Receptor-type tyrosine-protein phosphatase C OS=Homo sapiens GN=PTPRC PE=1 SV=2	0	94.665	27	26	33	26	1	1304	147.2	6.15	41.29	26
FALSE	High	Master Protein	P12956	X-ray repair cross-complementing protein 6 OS=Homo sapiens GN=XRCC6 PE=1 SV=2	0	136.299	50	26	55	26	1	609	69.8	6.64	69.7	26
FALSE	High	Master Protein	P50990	T-complex protein 1 subunit theta OS=Homo sapiens GN=CCT8 PE=1 SV=4	0	120.215	61	26	45	26	1	548	59.6	5.6	68.77	26
FALSE	High	Master Protein	P27708	CAD protein OS=Homo sapiens GN=CAD PE=1 SV=3	0	111.602	20	26	28	26	1	2225	242.8	6.46	42.96	26
FALSE	High	Master Protein	Q14204	Cytoplasmic dynein 1 heavy chain 1 OS=Homo sapiens GN=DYNC1H1 PE=1 SV=5	0	82.521	7	25	25	25	1	4646	532.1	6.4	25.11	25
FALSE	High	Master Protein	O75643	U5 small nuclear ribonucleoprotein 200 kDa helicase OS=Homo sapiens GN=SNRNP200 PE=1 SV=2	0	98.353	17	25	31	25	1	2136	244.4	6.06	29.59	25
FALSE	High	Master Protein	P06576	ATP synthase subunit beta, mitochondrial OS=Homo sapiens GN=ATP5B PE=1 SV=3	0	202.383	71	25	76	25	1	529	56.5	5.4	133.24	25
FALSE	High	Master Protein	P11142	Heat shock cognate 71 kDa protein OS=Homo sapiens GN=HSPA8 PE=1 SV=1	0	260.782	48	27	139	25	1	646	70.9	5.52	268.28	27
FALSE	High	Master Protein	P11021	78 kDa glucose-regulated protein OS=Homo sapiens GN=HSPA5 PE=1 SV=2	0	169.395	48	26	58	25	1	654	72.3	5.16	120.06	26
FALSE	High	Master Protein	P17987	T-complex protein 1 subunit alpha OS=Homo sapiens GN=TCP1 PE=1 SV=1	0	162.777	67	25	55	25	1	556	60.3	6.11	104.58	25
FALSE	High	Master Protein	P08238	Heat shock protein HSP 90-beta OS=Homo sapiens GN=HSP90AB1 PE=1 SV=4	0	272.074	55	38	159	24	1	724	83.2	5.03	356.1	38
FALSE	High	Master Protein	Q6P2Q9	Pre-mRNA-processing-splicing factor 8 OS=Homo sapiens GN=PRPF8 PE=1 SV=2	0	80.794	14	24	26	24	1	2335	273.4	8.84	22.76	24
FALSE	High	Master Protein	P13010	X-ray repair cross-complementing protein 5 OS=Homo sapiens GN=XRCC5 PE=1 SV=3	0	126.457	42	24	48	24	1	732	82.7	5.81	83.07	24
FALSE	High	Master Protein	P06733	Alpha-enolase OS=Homo sapiens GN=ENO1 PE=1 SV=2	0	300.691	72	27	183	24	1	434	47.1	7.39	321.59	27
FALSE	High	Master Protein	P78371	T-complex protein 1 subunit beta OS=Homo sapiens GN=CCT2 PE=1 SV=4	0	178.999	63	24	53	24	1	535	57.5	6.46	106.15	24
FALSE	High	Master Protein	Q99832	T-complex protein 1 subunit eta OS=Homo sapiens GN=CCT7 PE=1 SV=2	0	159.594	57	24	61	24	1	543	59.3	7.65	90.23	24
FALSE	High	Master Protein	P13645	Keratin, type I cytoskeletal 10 OS=Homo sapiens GN=KRT10 PE=1 SV=6	0	220.554	49	25	104	24	1	584	58.8	5.21	231.91	25
FALSE	High	Master Protein	O60610	Protein diaphanous homolog 1 OS=Homo sapiens GN=DIAPH1 PE=1 SV=2	0	105.46	27	24	30	24	1	1272	141.3	5.41	48.58	24
FALSE	High	Master Protein	P25205	DNA replication licensing factor MCM3 OS=Homo sapiens GN=MCM3 PE=1 SV=3	0	97.582	42	24	34	24	1	808	90.9	5.77	42.16	24
FALSE	High	Master Protein	P49368	T-complex protein 1 subunit gamma OS=Homo sapiens GN=CCT3 PE=1 SV=4	0	123.324	54	23	45	23	1	545	60.5	6.49	72.41	23
FALSE	High	Master Protein	P11586	C-1-tetrahydrofolate synthase, cytoplasmic OS=Homo sapiens GN=MTHFD1 PE=1 SV=3	0	90.168	33	23	30	23	1	935	101.5	7.3	53.19	23
FALSE	High	Master Protein	Q16531	DNA damage-binding protein 1 OS=Homo sapiens GN=DDB1 PE=1 SV=1	0	92.402	29	22	25	22	1	1140	126.9	5.26	37.53	22
FALSE	High	Master Protein	P31939	Bifunctional purine biosynthesis protein PURH OS=Homo sapiens GN=ATIC PE=1 SV=3	0	94.219	59	22	32	22	1	592	64.6	6.71	41.66	22
FALSE	High	Master Protein	P33993	DNA replication licensing factor MCM7 OS=Homo sapiens GN=MCM7 PE=1 SV=4	0	97.299	45	22	33	22	1	719	81.3	6.46	49.47	22
FALSE	High	Master Protein	P49736	DNA replication licensing factor MCM2 OS=Homo sapiens GN=MCM2 PE=1 SV=4	0	107.002	36	22	32	22	1	904	101.8	5.52	51.54	22
FALSE	High	Master Protein	P30101	Protein disulfide-isomerase A3 OS=Homo sapiens GN=PDIA3 PE=1 SV=4	0	79.062	46	21	35	21	1	505	56.7	6.35	47.92	21
FALSE	High	Master Protein	P00558	Phosphoglycerate kinase 1 OS=Homo sapiens GN=PGK1 PE=1 SV=3	0	213.578	62	21	91	21	1	417	44.6	8.1	200.63	21
FALSE	High	Master Protein	Q15393	Splicing factor 3B subunit 3 OS=Homo sapiens GN=SF3B3 PE=1 SV=4	0	103.521	23	21	30	21	1	1217	135.5	5.26	46.4	21
FALSE	High	Master Protein	Q15029	116 kDa U5 small nuclear ribonucleoprotein component OS=Homo sapiens GN=EFTUD2 PE=1 SV=1	0	80.889	36	21	25	21	1	972	109.4	5	28.74	21
FALSE	High	Master Protein	P00813	Adenosine deaminase OS=Homo sapiens GN=ADA PE=1 SV=3	0	113.512	70	21	50	21	1	363	40.7	5.95	60.93	21
FALSE	High	Master Protein	P31948	Stress-induced-phosphoprotein 1 OS=Homo sapiens GN=STIP1 PE=1 SV=1	0	97.927	44	21	42	21	1	543	62.6	6.8	42.02	21
FALSE	High	Master Protein	P22102	Trifunctional purine biosynthetic protein adenosine-3 OS=Homo sapiens GN=GART PE=1 SV=1	0	84.98	34	21	24	21	1	1010	107.7	6.7	41.24	21
FALSE	High	Master Protein	P49327	Fatty acid synthase OS=Homo sapiens GN=FASN PE=1 SV=3	0	69.986	12	21	21	21	1	2511	273.3	6.44	23.84	21
FALSE	High	Master Protein	P07814	Bifunctional glutamate/proline--tRNA ligase OS=Homo sapiens GN=EPRS PE=1 SV=5	0	91.204	22	20	26	20	1	1512	170.5	7.33	30	20
FALSE	High	Master Protein	P35908	Keratin, type II cytoskeletal 2 epidermal OS=Homo sapiens GN=KRT2 PE=1 SV=2	0	181.592	50	27	85	20	1	639	65.4	8	168.48	27
FALSE	High	Master Protein	P53396	ATP-citrate synthase OS=Homo sapiens GN=ACLY PE=1 SV=3	0	77.604	26	20	28	20	1	1101	120.8	7.33	36.12	20
FALSE	High	Master Protein	P25705	ATP synthase subunit alpha, mitochondrial OS=Homo sapiens GN=ATP5A1 PE=1 SV=1	0	122.875	48	20	53	20	1	553	59.7	9.13	89.27	20
FALSE	High	Master Protein	O75083	WD repeat-containing protein 1 OS=Homo sapiens GN=WDR1 PE=1 SV=4	0	142.152	51	19	41	19	1	606	66.2	6.65	90.95	19
FALSE	High	Master Protein	Q14980	Nuclear mitotic apparatus protein 1 OS=Homo sapiens GN=NUMA1 PE=1 SV=2	0	69	15	19	19	19	1	2115	238.1	5.78	18.19	19
FALSE	High	Master Protein	P09874	Poly [ADP-ribose] polymerase 1 OS=Homo sapiens GN=PARP1 PE=1 SV=4	0	84.609	28	19	28	19	1	1014	113	8.88	29.75	19
FALSE	High	Master Protein	P53621	Coatomer subunit alpha OS=Homo sapiens GN=COPA PE=1 SV=2	0	73.274	20	19	21	19	1	1224	138.3	7.66	36.7	19
FALSE	High	Master Protein	P33992	DNA replication licensing factor MCM5 OS=Homo sapiens GN=MCM5 PE=1 SV=5	0	76.757	37	19	23	19	1	734	82.2	8.37	31.19	19
FALSE	High	Master Protein	Q86UX7	Fermitin family homolog 3 OS=Homo sapiens GN=FERMT3 PE=1 SV=1	0	77.707	43	19	21	19	1	667	75.9	6.98	37.55	19
FALSE	High	Master Protein	P35580	Myosin-10 OS=Homo sapiens GN=MYH10 PE=1 SV=3	0	137.351	18	27	41	19	1	1976	228.9	5.54	53.09	27
FALSE	High	Master Protein	P22234	Multifunctional protein ADE2 OS=Homo sapiens GN=PAICS PE=1 SV=3	0	101.4	48	19	38	19	1	425	47	7.23	59.25	19
FALSE	High	Master Protein	P07900	Heat shock protein HSP 90-alpha OS=Homo sapiens GN=HSP90AA1 PE=1 SV=5	0	220.921	51	32	129	19	1	732	84.6	5.02	277.29	32
FALSE	High	Master Protein	P26038	Moesin OS=Homo sapiens GN=MSN PE=1 SV=3	0	160.959	52	28	68	19	1	577	67.8	6.4	115.01	28
FALSE	High	Master Protein	P19338	Nucleolin OS=Homo sapiens GN=NCL PE=1 SV=3	0	142.708	32	19	54	19	1	710	76.6	4.7	123.02	19
FALSE	High	Master Protein	Q01813	ATP-dependent 6-phosphofructokinase, platelet type OS=Homo sapiens GN=PFKP PE=1 SV=2	0	93.756	38	20	29	19	1	784	85.5	7.55	25.46	20
FALSE	High	Master Protein	P20700	Lamin-B1 OS=Homo sapiens GN=LMNB1 PE=1 SV=2	0	110.047	42	20	36	19	1	586	66.4	5.16	61.26	20
FALSE	High	Master Protein	Q92841	Probable ATP-dependent RNA helicase DDX17 OS=Homo sapiens GN=DDX17 PE=1 SV=2	0	100.286	37	23	46	18	1	729	80.2	8.27	73.03	23
FALSE	High	Master Protein	P46940	Ras GTPase-activating-like protein IQGAP1 OS=Homo sapiens GN=IQGAP1 PE=1 SV=1	0	91.707	16	18	23	18	1	1657	189.1	6.48	37.56	18
FALSE	High	Master Protein	Q9P258	Protein RCC2 OS=Homo sapiens GN=RCC2 PE=1 SV=2	0	71.427	45	18	24	18	1	522	56	8.78	46.07	18
FALSE	High	Master Protein	P04406	Glyceraldehyde-3-phosphate dehydrogenase OS=Homo sapiens GN=GAPDH PE=1 SV=3	0	230.612	61	18	181	18	1	335	36	8.46	363.25	18
FALSE	High	Master Protein	P50991	T-complex protein 1 subunit delta OS=Homo sapiens GN=CCT4 PE=1 SV=4	0	130.311	50	19	48	18	1	539	57.9	7.83	78.19	19
FALSE	High	Master Protein	Q9BSJ8	Extended synaptotagmin-1 OS=Homo sapiens GN=ESYT1 PE=1 SV=1	0	75.467	29	18	21	18	1	1104	122.8	5.83	28.26	18
FALSE	High	Master Protein	Q13263	Transcription intermediary factor 1-beta OS=Homo sapiens GN=TRIM28 PE=1 SV=5	0	93.852	40	18	26	18	1	835	88.5	5.77	53.18	18
FALSE	High	Master Protein	B0I1T2	Unconventional myosin-Ig OS=Homo sapiens GN=MYO1G PE=1 SV=2	0	92.271	26	17	21	17	1	1018	116.4	8.73	33.94	17
FALSE	High	Master Protein	P29401	Transketolase OS=Homo sapiens GN=TKT PE=1 SV=3	0	111.98	40	17	42	17	1	623	67.8	7.66	71.19	17
FALSE	High	Master Protein	P48643	T-complex protein 1 subunit epsilon OS=Homo sapiens GN=CCT5 PE=1 SV=1	0	124.934	53	18	54	17	1	541	59.6	5.66	69.72	18
FALSE	High	Master Protein	P33991	DNA replication licensing factor MCM4 OS=Homo sapiens GN=MCM4 PE=1 SV=5	0	79.228	29	17	26	17	1	863	96.5	6.74	45.72	17
FALSE	High	Master Protein	Q00839	Heterogeneous nuclear ribonucleoprotein U OS=Homo sapiens GN=HNRNPU PE=1 SV=6	0	117.473	29	17	52	17	1	825	90.5	6	101.79	17
FALSE	High	Master Protein	P06744	Glucose-6-phosphate isomerase OS=Homo sapiens GN=GPI PE=1 SV=4	0	93.476	47	17	38	17	1	558	63.1	8.32	57.78	17
FALSE	High	Master Protein	Q7KZF4	Staphylococcal nuclease domain-containing protein 1 OS=Homo sapiens GN=SND1 PE=1 SV=1	0	78.599	28	17	25	17	1	910	101.9	7.17	29.95	17
FALSE	High	Master Protein	O43143	Pre-mRNA-splicing factor ATP-dependent RNA helicase DHX15 OS=Homo sapiens GN=DHX15 PE=1 SV=2	0	65.51	24	17	25	17	1	795	90.9	7.46	23.16	17
FALSE	High	Master Protein	P35998	26S protease regulatory subunit 7 OS=Homo sapiens GN=PSMC2 PE=1 SV=3	0	58.038	47	17	20	17	1	433	48.6	5.95	19.53	17
FALSE	High	Master Protein	P40926	Malate dehydrogenase, mitochondrial OS=Homo sapiens GN=MDH2 PE=1 SV=3	0	101.682	70	17	38	17	1	338	35.5	8.68	94.64	17
FALSE	High	Master Protein	P61978	Heterogeneous nuclear ribonucleoprotein K OS=Homo sapiens GN=HNRNPK PE=1 SV=1	0	121.724	47	17	51	17	1	463	50.9	5.54	94.68	17
FALSE	High	Master Protein	P38646	Stress-70 protein, mitochondrial OS=Homo sapiens GN=HSPA9 PE=1 SV=2	0	106.823	39	17	35	17	1	679	73.6	6.16	71.48	17
FALSE	High	Master Protein	P14625	Endoplasmin OS=Homo sapiens GN=HSP90B1 PE=1 SV=1	0	86.764	29	17	23	16	1	803	92.4	4.84	41.53	17
FALSE	High	Master Protein	Q9Y5B9	FACT complex subunit SPT16 OS=Homo sapiens GN=SUPT16H PE=1 SV=1	0	62.568	25	16	21	16	1	1047	119.8	5.66	25.94	16
FALSE	High	Master Protein	P23396	40S ribosomal protein S3 OS=Homo sapiens GN=RPS3 PE=1 SV=2	0	84.191	65	16	42	16	1	243	26.7	9.66	67.31	16
FALSE	High	Master Protein	O43390	Heterogeneous nuclear ribonucleoprotein R OS=Homo sapiens GN=HNRNPR PE=1 SV=1	0	90.658	38	21	31	16	1	633	70.9	8.13	58.79	21
FALSE	High	Master Protein	P18669	Phosphoglycerate mutase 1 OS=Homo sapiens GN=PGAM1 PE=1 SV=2	0	117.095	66	16	53	16	1	254	28.8	7.18	92.77	16
FALSE	High	Master Protein	P26599	Polypyrimidine tract-binding protein 1 OS=Homo sapiens GN=PTBP1 PE=1 SV=1	0	111.794	66	17	37	16	1	531	57.2	9.17	65.92	17
FALSE	High	Master Protein	O75533	Splicing factor 3B subunit 1 OS=Homo sapiens GN=SF3B1 PE=1 SV=3	0	71.61	19	16	18	16	1	1304	145.7	7.09	24.86	16
FALSE	High	Master Protein	Q8TEM1	Nuclear pore membrane glycoprotein 210 OS=Homo sapiens GN=NUP210 PE=1 SV=3	0	70.487	13	16	19	16	1	1887	205	6.81	26.31	16
FALSE	High	Master Protein	Q8N163	Cell cycle and apoptosis regulator protein 2 OS=Homo sapiens GN=CCAR2 PE=1 SV=2	0	65.48	33	16	19	16	1	923	102.8	5.22	29.57	16
FALSE	High	Master Protein	P07237	Protein disulfide-isomerase OS=Homo sapiens GN=P4HB PE=1 SV=3	0	67.276	48	15	25	15	1	508	57.1	4.87	31.38	15
FALSE	High	Master Protein	Q9NR30	Nucleolar RNA helicase 2 OS=Homo sapiens GN=DDX21 PE=1 SV=5	0	59.163	28	17	18	15	1	783	87.3	9.28	21.55	17
FALSE	High	Master Protein	P63244	Receptor of activated protein C kinase 1 OS=Homo sapiens GN=RACK1 PE=1 SV=3	0	109.903	74	15	42	15	1	317	35.1	7.69	85.1	15
FALSE	High	Master Protein	P36578	60S ribosomal protein L4 OS=Homo sapiens GN=RPL4 PE=1 SV=5	0	76.122	34	15	27	15	1	427	47.7	11.06	34.87	15
FALSE	High	Master Protein	P00338	L-lactate dehydrogenase A chain OS=Homo sapiens GN=LDHA PE=1 SV=2	0	80.074	60	16	34	15	1	332	36.7	8.27	53.32	16
FALSE	High	Master Protein	P54578	Ubiquitin carboxyl-terminal hydrolase 14 OS=Homo sapiens GN=USP14 PE=1 SV=3	0	68.44	38	15	18	15	1	494	56	5.3	36.79	15
FALSE	High	Master Protein	P11388	DNA topoisomerase 2-alpha OS=Homo sapiens GN=TOP2A PE=1 SV=3	0	84.479	21	20	23	15	1	1531	174.3	8.72	35.05	20
FALSE	High	Master Protein	Q14566	DNA replication licensing factor MCM6 OS=Homo sapiens GN=MCM6 PE=1 SV=1	0	63.9	23	15	17	15	1	821	92.8	5.41	31.77	15
FALSE	High	Master Protein	P49915	GMP synthase [glutamine-hydrolyzing] OS=Homo sapiens GN=GMPS PE=1 SV=1	0	55.516	38	15	18	15	1	693	76.7	6.87	16.29	15
FALSE	High	Master Protein	P22626	Heterogeneous nuclear ribonucleoproteins A2/B1 OS=Homo sapiens GN=HNRNPA2B1 PE=1 SV=2	0	121.085	68	16	47	15	1	353	37.4	8.95	89.7	16
FALSE	High	Master Protein	P40227	T-complex protein 1 subunit zeta OS=Homo sapiens GN=CCT6A PE=1 SV=3	0	82.738	41	15	31	15	1	531	58	6.68	58.1	15
FALSE	High	Master Protein	Q9Y4L1	Hypoxia up-regulated protein 1 OS=Homo sapiens GN=HYOU1 PE=1 SV=1	0	58.112	22	15	18	15	1	999	111.3	5.22	11.81	15
FALSE	High	Master Protein	Q02790	Peptidyl-prolyl cis-trans isomerase FKBP4 OS=Homo sapiens GN=FKBP4 PE=1 SV=3	0	77.113	42	15	22	15	1	459	51.8	5.43	29	15
FALSE	High	Master Protein	P61158	Actin-related protein 3 OS=Homo sapiens GN=ACTR3 PE=1 SV=3	0	75.693	57	15	24	15	1	418	47.3	5.88	34.82	15
FALSE	High	Master Protein	Q15459	Splicing factor 3A subunit 1 OS=Homo sapiens GN=SF3A1 PE=1 SV=1	0	50.391	24	14	16	14	1	793	88.8	5.22	22.65	14
FALSE	High	Master Protein	P49588	Alanine--tRNA ligase, cytoplasmic OS=Homo sapiens GN=AARS PE=1 SV=2	0	55.171	21	14	14	14	1	968	106.7	5.53	21.81	14
FALSE	High	Master Protein	P04075	Fructose-bisphosphate aldolase A OS=Homo sapiens GN=ALDOA PE=1 SV=2	0	139.109	58	16	53	14	1	364	39.4	8.09	118.88	16
FALSE	High	Master Protein	P60709	Actin, cytoplasmic 1 OS=Homo sapiens GN=ACTB PE=1 SV=1	0	320.366	63	19	291	14	1	375	41.7	5.48	700.02	19
FALSE	High	Master Protein	O43707	Alpha-actinin-4 OS=Homo sapiens GN=ACTN4 PE=1 SV=2	0	96.707	36	22	26	14	1	911	104.8	5.44	41.17	22
FALSE	High	Master Protein	Q08945	FACT complex subunit SSRP1 OS=Homo sapiens GN=SSRP1 PE=1 SV=1	0	53.902	27	14	19	14	1	709	81	6.87	30.66	14
FALSE	High	Master Protein	O00571	ATP-dependent RNA helicase DDX3X OS=Homo sapiens GN=DDX3X PE=1 SV=3	0	56.202	28	15	24	14	1	662	73.2	7.18	32.66	15
FALSE	High	Master Protein	P60174	Triosephosphate isomerase OS=Homo sapiens GN=TPI1 PE=1 SV=3	0	106.552	61	14	37	14	1	286	30.8	5.92	75.44	14
FALSE	High	Master Protein	P68104	Elongation factor 1-alpha 1 OS=Homo sapiens GN=EEF1A1 PE=1 SV=1	0	144.665	58	14	100	14	1	462	50.1	9.01	247.49	14
FALSE	High	Master Protein	P12268	Inosine-5'-monophosphate dehydrogenase 2 OS=Homo sapiens GN=IMPDH2 PE=1 SV=2	0	66.068	39	14	23	14	1	514	55.8	6.9	34.57	14
FALSE	High	Master Protein	P21796	Voltage-dependent anion-selective channel protein 1 OS=Homo sapiens GN=VDAC1 PE=1 SV=2	0	92.163	69	15	32	14	1	283	30.8	8.54	62.71	15
FALSE	High	Master Protein	Q12906	Interleukin enhancer-binding factor 3 OS=Homo sapiens GN=ILF3 PE=1 SV=3	0	68.058	21	14	25	14	1	894	95.3	8.76	32.31	14
FALSE	High	Master Protein	Q13435	Splicing factor 3B subunit 2 OS=Homo sapiens GN=SF3B2 PE=1 SV=2	0	57.441	27	14	16	14	1	895	100.2	5.67	20.79	14
FALSE	High	Master Protein	Q92945	Far upstream element-binding protein 2 OS=Homo sapiens GN=KHSRP PE=1 SV=4	0	75.439	36	14	22	14	1	711	73.1	7.3	29.42	14
FALSE	High	Master Protein	P43243	Matrin-3 OS=Homo sapiens GN=MATR3 PE=1 SV=2	0	77.364	24	14	27	14	1	847	94.6	6.25	26.48	14
FALSE	High	Master Protein	P55884	Eukaryotic translation initiation factor 3 subunit B OS=Homo sapiens GN=EIF3B PE=1 SV=3	0	61.876	25	14	18	14	1	814	92.4	5	23.69	14
FALSE	High	Master Protein	P04083	Annexin A1 OS=Homo sapiens GN=ANXA1 PE=1 SV=2	0	59.526	47	14	18	14	1	346	38.7	7.02	27.58	14
FALSE	High	Master Protein	Q92900	Regulator of nonsense transcripts 1 OS=Homo sapiens GN=UPF1 PE=1 SV=2	0	57.34	21	14	15	14	1	1129	124.3	6.61	21.1	14
FALSE	High	Master Protein	P13667	Protein disulfide-isomerase A4 OS=Homo sapiens GN=PDIA4 PE=1 SV=2	0	37.809	31	14	15	14	1	645	72.9	5.07	15.73	14
FALSE	High	Master Protein	P49321	Nuclear autoantigenic sperm protein OS=Homo sapiens GN=NASP PE=1 SV=2	0	77.227	31	14	23	14	1	788	85.2	4.3	29.64	14
FALSE	High	Master Protein	P41252	Isoleucine--tRNA ligase, cytoplasmic OS=Homo sapiens GN=IARS PE=1 SV=2	0	63.665	16	14	15	14	1	1262	144.4	6.15	22.91	14
FALSE	High	Master Protein	P17844	Probable ATP-dependent RNA helicase DDX5 OS=Homo sapiens GN=DDX5 PE=1 SV=1	0	91.62	36	19	42	14	1	614	69.1	8.92	77.02	19
FALSE	High	Master Protein	P14868	Aspartate--tRNA ligase, cytoplasmic OS=Homo sapiens GN=DARS PE=1 SV=2	0	53.152	34	13	15	13	1	501	57.1	6.55	23.36	13
FALSE	High	Master Protein	P48735	Isocitrate dehydrogenase [NADP], mitochondrial OS=Homo sapiens GN=IDH2 PE=1 SV=2	0	75.833	41	14	28	13	1	452	50.9	8.69	35.03	14
FALSE	High	Master Protein	P08779	Keratin, type I cytoskeletal 16 OS=Homo sapiens GN=KRT16 PE=1 SV=4	0	121.899	49	19	42	13	1	473	51.2	5.05	61.76	19
FALSE	High	Master Protein	Q9NSD9	Phenylalanine--tRNA ligase beta subunit OS=Homo sapiens GN=FARSB PE=1 SV=3	0	43.789	30	13	15	13	1	589	66.1	6.84	18.02	13
FALSE	High	Master Protein	Q13200	26S proteasome non-ATPase regulatory subunit 2 OS=Homo sapiens GN=PSMD2 PE=1 SV=3	0	53.347	23	13	17	13	1	908	100.1	5.2	9.34	13
FALSE	High	Master Protein	P52566	Rho GDP-dissociation inhibitor 2 OS=Homo sapiens GN=ARHGDIB PE=1 SV=3	0	124.681	70	13	48	13	1	201	23	5.21	94.87	13
FALSE	High	Master Protein	O43175	D-3-phosphoglycerate dehydrogenase OS=Homo sapiens GN=PHGDH PE=1 SV=4	0	53.601	29	13	19	13	1	533	56.6	6.71	29.53	13
FALSE	High	Master Protein	Q16555	Dihydropyrimidinase-related protein 2 OS=Homo sapiens GN=DPYSL2 PE=1 SV=1	0	61.51	34	13	15	13	1	572	62.3	6.38	34.06	13
FALSE	High	Master Protein	P14866	Heterogeneous nuclear ribonucleoprotein L OS=Homo sapiens GN=HNRNPL PE=1 SV=2	0	78.335	49	13	30	13	1	589	64.1	8.22	54.59	13
FALSE	High	Master Protein	Q92598	Heat shock protein 105 kDa OS=Homo sapiens GN=HSPH1 PE=1 SV=1	0	64.396	24	15	17	13	1	858	96.8	5.39	27.14	15
FALSE	High	Master Protein	P31153	S-adenosylmethionine synthase isoform type-2 OS=Homo sapiens GN=MAT2A PE=1 SV=1	0	47.199	35	13	18	13	1	395	43.6	6.48	13.17	13
FALSE	High	Master Protein	P26639	Threonine--tRNA ligase, cytoplasmic OS=Homo sapiens GN=TARS PE=1 SV=3	0	37.774	24	13	14	13	1	723	83.4	6.67	18.16	13
FALSE	High	Master Protein	P52272	Heterogeneous nuclear ribonucleoprotein M OS=Homo sapiens GN=HNRNPM PE=1 SV=3	0	65.362	29	13	22	13	1	730	77.5	8.7	30.59	13
FALSE	High	Master Protein	P07195	L-lactate dehydrogenase B chain OS=Homo sapiens GN=LDHB PE=1 SV=2	0	93.485	46	14	38	13	1	334	36.6	6.05	64.11	14
FALSE	High	Master Protein	Q9P2J5	Leucine--tRNA ligase, cytoplasmic OS=Homo sapiens GN=LARS PE=1 SV=2	0	44.732	17	13	14	13	1	1176	134.4	7.3	15.49	13
FALSE	High	Master Protein	P23368	NAD-dependent malic enzyme, mitochondrial OS=Homo sapiens GN=ME2 PE=1 SV=1	0	50.176	42	13	16	13	1	584	65.4	7.61	13.86	13
FALSE	High	Master Protein	Q14697	Neutral alpha-glucosidase AB OS=Homo sapiens GN=GANAB PE=1 SV=3	0	53.719	20	13	19	13	1	944	106.8	6.14	23.24	13
FALSE	High	Master Protein	Q9BUJ2	Heterogeneous nuclear ribonucleoprotein U-like protein 1 OS=Homo sapiens GN=HNRNPUL1 PE=1 SV=2	0	49.761	24	13	15	13	1	856	95.7	6.92	16.16	13
FALSE	High	Master Protein	P31146	Coronin-1A OS=Homo sapiens GN=CORO1A PE=1 SV=4	0	95.59	37	13	39	13	1	461	51	6.68	69.04	13
FALSE	High	Master Protein	P27797	Calreticulin OS=Homo sapiens GN=CALR PE=1 SV=1	0	90.491	49	13	56	13	1	417	48.1	4.44	82.27	13
FALSE	High	Master Protein	P13489	Ribonuclease inhibitor OS=Homo sapiens GN=RNH1 PE=1 SV=2	0	68.912	52	13	15	13	1	461	49.9	4.82	27.13	13
FALSE	High	Master Protein	O15371	Eukaryotic translation initiation factor 3 subunit D OS=Homo sapiens GN=EIF3D PE=1 SV=1	0	60.629	38	13	14	13	1	548	63.9	6.05	20.05	13
FALSE	High	Master Protein	Q99536	Synaptic vesicle membrane protein VAT-1 homolog OS=Homo sapiens GN=VAT1 PE=1 SV=2	0	85.697	43	12	22	12	1	393	41.9	6.29	57.83	12
FALSE	High	Master Protein	P17812	CTP synthase 1 OS=Homo sapiens GN=CTPS1 PE=1 SV=2	0	39.986	27	12	14	12	1	591	66.6	6.46	13.13	12
FALSE	High	Master Protein	P22087	rRNA 2'-O-methyltransferase fibrillarin OS=Homo sapiens GN=FBL PE=1 SV=2	0	46.683	40	12	15	12	1	321	33.8	10.18	17.85	12
FALSE	High	Master Protein	O75534	Cold shock domain-containing protein E1 OS=Homo sapiens GN=CSDE1 PE=1 SV=2	0	44.928	20	12	14	12	1	798	88.8	6.25	13.04	12
FALSE	High	Master Protein	Q15717	ELAV-like protein 1 OS=Homo sapiens GN=ELAVL1 PE=1 SV=2	0	50.752	48	12	14	12	1	326	36.1	9.17	30.4	12
FALSE	High	Master Protein	Q99798	Aconitate hydratase, mitochondrial OS=Homo sapiens GN=ACO2 PE=1 SV=2	0	42.969	21	12	12	12	1	780	85.4	7.61	13.98	12
FALSE	High	Master Protein	P26196	Probable ATP-dependent RNA helicase DDX6 OS=Homo sapiens GN=DDX6 PE=1 SV=2	0	52.475	42	13	15	12	1	483	54.4	8.66	16.18	13
FALSE	High	Master Protein	P11717	Cation-independent mannose-6-phosphate receptor OS=Homo sapiens GN=IGF2R PE=1 SV=3	0	45.053	7	12	12	12	1	2491	274.2	5.94	14.75	12
FALSE	High	Master Protein	Q16666	Gamma-interferon-inducible protein 16 OS=Homo sapiens GN=IFI16 PE=1 SV=3	0	36.53	22	12	15	12	1	785	88.2	9.28	11.33	12
FALSE	High	Master Protein	P54136	Arginine--tRNA ligase, cytoplasmic OS=Homo sapiens GN=RARS PE=1 SV=2	0	39.413	28	12	13	12	1	660	75.3	6.68	10.94	12
FALSE	High	Master Protein	P12814	Alpha-actinin-1 OS=Homo sapiens GN=ACTN1 PE=1 SV=2	0	85.517	32	20	23	12	1	892	103	5.41	38.27	20
FALSE	High	Master Protein	O15067	Phosphoribosylformylglycinamidine synthase OS=Homo sapiens GN=PFAS PE=1 SV=4	0	38.513	14	12	13	12	1	1338	144.6	5.76	12.07	12
FALSE	High	Master Protein	P39023	60S ribosomal protein L3 OS=Homo sapiens GN=RPL3 PE=1 SV=2	0	60.213	31	12	23	12	1	403	46.1	10.18	23.53	12
FALSE	High	Master Protein	P26641	Elongation factor 1-gamma OS=Homo sapiens GN=EEF1G PE=1 SV=3	0	86.599	37	12	32	12	1	437	50.1	6.67	63.74	12
FALSE	High	Master Protein	P31689	DnaJ homolog subfamily A member 1 OS=Homo sapiens GN=DNAJA1 PE=1 SV=2	0	62.523	30	12	21	12	1	397	44.8	7.08	28.98	12
FALSE	High	Master Protein	Q8WUM4	Programmed cell death 6-interacting protein OS=Homo sapiens GN=PDCD6IP PE=1 SV=1	0	38.766	20	12	12	12	1	868	96	6.52	12.43	12
FALSE	High	Master Protein	P51610	Host cell factor 1 OS=Homo sapiens GN=HCFC1 PE=1 SV=2	0	41.252	11	12	13	12	1	2035	208.6	7.46	10.38	12
FALSE	High	Master Protein	Q13177	Serine/threonine-protein kinase PAK 2 OS=Homo sapiens GN=PAK2 PE=1 SV=3	0	56.106	40	12	17	12	1	524	58	5.96	25.89	12
FALSE	High	Master Protein	P05023	Sodium/potassium-transporting ATPase subunit alpha-1 OS=Homo sapiens GN=ATP1A1 PE=1 SV=1	0	45.666	15	11	12	11	1	1023	112.8	5.49	21.64	11
FALSE	High	Master Protein	P51149	Ras-related protein Rab-7a OS=Homo sapiens GN=RAB7A PE=1 SV=1	0	55.814	67	11	15	11	1	207	23.5	6.7	28.31	11
FALSE	High	Master Protein	P62805	Histone H4 OS=Homo sapiens GN=HIST1H4A PE=1 SV=2	0	89.683	51	11	194	11	1	103	11.4	11.36	316.9	11
FALSE	High	Master Protein	P61221	ATP-binding cassette sub-family E member 1 OS=Homo sapiens GN=ABCE1 PE=1 SV=1	0	45.329	27	11	12	11	1	599	67.3	8.34	22.53	11
FALSE	High	Master Protein	P49411	Elongation factor Tu, mitochondrial OS=Homo sapiens GN=TUFM PE=1 SV=2	0	56.991	35	11	15	11	1	452	49.5	7.61	20.99	11
FALSE	High	Master Protein	P47756	F-actin-capping protein subunit beta OS=Homo sapiens GN=CAPZB PE=1 SV=4	0	52.676	47	11	20	11	1	277	31.3	5.59	29.6	11
FALSE	High	Master Protein	P12004	Proliferating cell nuclear antigen OS=Homo sapiens GN=PCNA PE=1 SV=1	0	80.582	63	11	32	11	1	261	28.8	4.69	67.82	11
FALSE	High	Master Protein	O60506	Heterogeneous nuclear ribonucleoprotein Q OS=Homo sapiens GN=SYNCRIP PE=1 SV=2	0	60.696	34	16	23	11	1	623	69.6	8.59	29.9	16
FALSE	High	Master Protein	P04843	Dolichyl-diphosphooligosaccharide--protein glycosyltransferase subunit 1 OS=Homo sapiens GN=RPN1 PE=1 SV=1	0	53.166	23	11	18	11	1	607	68.5	6.38	29.82	11
FALSE	High	Master Protein	P67936	Tropomyosin alpha-4 chain OS=Homo sapiens GN=TPM4 PE=1 SV=3	0	69.067	37	15	22	11	1	248	28.5	4.69	38.2	15
FALSE	High	Master Protein	Q86VP6	Cullin-associated NEDD8-dissociated protein 1 OS=Homo sapiens GN=CAND1 PE=1 SV=2	0	33.674	13	11	15	11	1	1230	136.3	5.78	17	11
FALSE	High	Master Protein	Q15233	Non-POU domain-containing octamer-binding protein OS=Homo sapiens GN=NONO PE=1 SV=4	0	70.54	38	11	29	11	1	471	54.2	8.95	37.99	11
FALSE	High	Master Protein	P18124	60S ribosomal protein L7 OS=Homo sapiens GN=RPL7 PE=1 SV=1	0	35.542	35	11	20	11	1	248	29.2	10.65	19.31	11
FALSE	High	Master Protein	Q9UHD8	Septin-9 OS=Homo sapiens GN=SEPT9 PE=1 SV=2	0	48.535	29	11	16	11	1	586	65.4	8.97	13.28	11
FALSE	High	Master Protein	Q9Y3F4	Serine-threonine kinase receptor-associated protein OS=Homo sapiens GN=STRAP PE=1 SV=1	0	45.653	53	11	13	11	1	350	38.4	5.12	18.62	11
FALSE	High	Master Protein	P11940	Polyadenylate-binding protein 1 OS=Homo sapiens GN=PABPC1 PE=1 SV=2	0	81.03	29	18	28	11	1	636	70.6	9.5	53.24	18
FALSE	High	Master Protein	Q9NY33	Dipeptidyl peptidase 3 OS=Homo sapiens GN=DPP3 PE=1 SV=2	0	51.451	26	11	16	11	1	737	82.5	5.1	18.39	11
FALSE	High	Master Protein	B5ME19	Eukaryotic translation initiation factor 3 subunit C-like protein OS=Homo sapiens GN=EIF3CL PE=3 SV=1	0	37.101	16	11	11	11	1	914	105.4	5.64	12.86	11
FALSE	High	Master Protein	Q9UQ80	Proliferation-associated protein 2G4 OS=Homo sapiens GN=PA2G4 PE=1 SV=3	0	49.008	35	11	15	11	1	394	43.8	6.55	16.72	11
FALSE	High	Master Protein	Q07955	Serine/arginine-rich splicing factor 1 OS=Homo sapiens GN=SRSF1 PE=1 SV=2	0	39.817	35	11	25	11	1	248	27.7	10.36	39.32	11
FALSE	High	Master Protein	O00231	26S proteasome non-ATPase regulatory subunit 11 OS=Homo sapiens GN=PSMD11 PE=1 SV=3	0	40.736	33	11	11	11	1	422	47.4	6.48	12.95	11
FALSE	High	Master Protein	O95347	Structural maintenance of chromosomes protein 2 OS=Homo sapiens GN=SMC2 PE=1 SV=2	0	36.765	12	11	12	11	1	1197	135.6	8.43	11.42	11
FALSE	High	Master Protein	P23526	Adenosylhomocysteinase OS=Homo sapiens GN=AHCY PE=1 SV=4	0	51.404	33	12	20	11	1	432	47.7	6.34	33.45	12
FALSE	High	Master Protein	P11413	Glucose-6-phosphate 1-dehydrogenase OS=Homo sapiens GN=G6PD PE=1 SV=4	0	39.318	29	11	12	11	1	515	59.2	6.84	15.89	11
FALSE	High	Master Protein	P29144	Tripeptidyl-peptidase 2 OS=Homo sapiens GN=TPP2 PE=1 SV=4	0	36.827	13	11	11	11	1	1249	138.3	6.32	11.63	11
FALSE	High	Master Protein	P62258	14-3-3 protein epsilon OS=Homo sapiens GN=YWHAE PE=1 SV=1	0	76.391	63	13	39	11	1	255	29.2	4.74	66.64	13
FALSE	High	Master Protein	P52292	Importin subunit alpha-1 OS=Homo sapiens GN=KPNA2 PE=1 SV=1	0	46.004	34	11	16	11	1	529	57.8	5.4	23.57	11
FALSE	High	Master Protein	Q12905	Interleukin enhancer-binding factor 2 OS=Homo sapiens GN=ILF2 PE=1 SV=2	0	63.601	51	11	25	11	1	390	43	5.26	39.41	11
FALSE	High	Master Protein	P50395	Rab GDP dissociation inhibitor beta OS=Homo sapiens GN=GDI2 PE=1 SV=2	0	87.294	46	13	28	11	1	445	50.6	6.47	41.82	13
FALSE	High	Master Protein	P35606	Coatomer subunit beta' OS=Homo sapiens GN=COPB2 PE=1 SV=2	0	42.547	19	11	12	11	1	906	102.4	5.27	12.79	11
FALSE	High	Master Protein	Q99460	26S proteasome non-ATPase regulatory subunit 1 OS=Homo sapiens GN=PSMD1 PE=1 SV=2	0	37.663	22	11	13	11	1	953	105.8	5.39	18.54	11
FALSE	High	Master Protein	P60842	Eukaryotic initiation factor 4A-I OS=Homo sapiens GN=EIF4A1 PE=1 SV=1	0	121.21	59	19	47	11	1	406	46.1	5.48	58.22	19
FALSE	High	Master Protein	P23528	Cofilin-1 OS=Homo sapiens GN=CFL1 PE=1 SV=3	0	74.694	58	11	32	11	1	166	18.5	8.09	68.66	11
FALSE	High	Master Protein	P08865	40S ribosomal protein SA OS=Homo sapiens GN=RPSA PE=1 SV=4	0	68.317	43	10	21	10	1	295	32.8	4.87	45.81	10
FALSE	High	Master Protein	P11387	DNA topoisomerase 1 OS=Homo sapiens GN=TOP1 PE=1 SV=2	0	28.863	17	10	13	10	1	765	90.7	9.31	14.28	10
FALSE	High	Master Protein	P23246	Splicing factor, proline- and glutamine-rich OS=Homo sapiens GN=SFPQ PE=1 SV=2	0	52.938	20	10	22	10	1	707	76.1	9.44	22.82	10
FALSE	High	Master Protein	Q16881	Thioredoxin reductase 1, cytoplasmic OS=Homo sapiens GN=TXNRD1 PE=1 SV=3	0	48.697	31	10	12	10	1	649	70.9	7.39	19.79	10
FALSE	High	Master Protein	P62424	60S ribosomal protein L7a OS=Homo sapiens GN=RPL7A PE=1 SV=2	0	59.249	30	10	20	10	1	266	30	10.61	36.91	10
FALSE	High	Master Protein	Q92499	ATP-dependent RNA helicase DDX1 OS=Homo sapiens GN=DDX1 PE=1 SV=2	0	40.535	19	10	11	10	1	740	82.4	7.23	16.68	10
FALSE	High	Master Protein	P27694	Replication protein A 70 kDa DNA-binding subunit OS=Homo sapiens GN=RPA1 PE=1 SV=2	0	38.388	24	10	13	10	1	616	68.1	7.21	14.56	10
FALSE	High	Master Protein	P02533	Keratin, type I cytoskeletal 14 OS=Homo sapiens GN=KRT14 PE=1 SV=4	0	113.05	46	19	43	10	1	472	51.5	5.16	56.92	19
FALSE	High	Master Protein	P55265	Double-stranded RNA-specific adenosine deaminase OS=Homo sapiens GN=ADAR PE=1 SV=4	0	49.041	14	10	10	10	1	1226	136	8.65	17.81	10
FALSE	High	Master Protein	P39656	Dolichyl-diphosphooligosaccharide--protein glycosyltransferase 48 kDa subunit OS=Homo sapiens GN=DDOST PE=1 SV=4	0	41.915	36	10	13	10	1	456	50.8	6.55	19.4	10
FALSE	High	Master Protein	Q9Y2X3	Nucleolar protein 58 OS=Homo sapiens GN=NOP58 PE=1 SV=1	0	42.04	27	10	11	10	1	529	59.5	8.92	16.56	10
FALSE	High	Master Protein	P00505	Aspartate aminotransferase, mitochondrial OS=Homo sapiens GN=GOT2 PE=1 SV=3	0	43.794	28	10	13	10	1	430	47.5	9.01	28.45	10
FALSE	High	Master Protein	P07339	Cathepsin D OS=Homo sapiens GN=CTSD PE=1 SV=1	0	39.919	33	10	13	10	1	412	44.5	6.54	11.14	10
FALSE	High	Master Protein	O60264	SWI/SNF-related matrix-associated actin-dependent regulator of chromatin subfamily A member 5 OS=Homo sapiens GN=SMARCA5 PE=1 SV=1	0	24.711	14	10	10	10	1	1052	121.8	8.09	6.5	10
FALSE	High	Master Protein	P23284	Peptidyl-prolyl cis-trans isomerase B OS=Homo sapiens GN=PPIB PE=1 SV=2	0	40.924	46	10	17	10	1	216	23.7	9.41	20.1	10
FALSE	High	Master Protein	P21281	V-type proton ATPase subunit B, brain isoform OS=Homo sapiens GN=ATP6V1B2 PE=1 SV=3	0	35.698	36	10	12	10	1	511	56.5	5.81	12.04	10
FALSE	High	Master Protein	P07741	Adenine phosphoribosyltransferase OS=Homo sapiens GN=APRT PE=1 SV=2	0	49.295	73	10	18	10	1	180	19.6	6.02	22.38	10
FALSE	High	Master Protein	Q5T4S7	E3 ubiquitin-protein ligase UBR4 OS=Homo sapiens GN=UBR4 PE=1 SV=1	0	25.725	3	10	10	10	1	5183	573.5	6.04	0	10
FALSE	High	Master Protein	P28838	Cytosol aminopeptidase OS=Homo sapiens GN=LAP3 PE=1 SV=3	0	42.342	28	10	11	10	1	519	56.1	7.93	12.52	10
FALSE	High	Master Protein	Q9UHX1	Poly(U)-binding-splicing factor PUF60 OS=Homo sapiens GN=PUF60 PE=1 SV=1	0	47.832	28	10	15	10	1	559	59.8	5.29	18.29	10
FALSE	High	Master Protein	Q01518	Adenylyl cyclase-associated protein 1 OS=Homo sapiens GN=CAP1 PE=1 SV=5	0	60.652	29	10	22	10	1	475	51.9	8.06	34.44	10
FALSE	High	Master Protein	P61247	40S ribosomal protein S3a OS=Homo sapiens GN=RPS3A PE=1 SV=2	0	47.811	38	10	21	10	1	264	29.9	9.73	35.07	10
FALSE	High	Master Protein	Q9Y265	RuvB-like 1 OS=Homo sapiens GN=RUVBL1 PE=1 SV=1	0	48.639	30	10	13	10	1	456	50.2	6.42	26.05	10
FALSE	High	Master Protein	Q14103	Heterogeneous nuclear ribonucleoprotein D0 OS=Homo sapiens GN=HNRNPD PE=1 SV=1	0	66.895	27	12	32	10	1	355	38.4	7.81	44.23	12
FALSE	High	Master Protein	P37802	Transgelin-2 OS=Homo sapiens GN=TAGLN2 PE=1 SV=3	0	48.363	67	10	22	10	1	199	22.4	8.25	23.04	10
FALSE	High	Master Protein	P06493	Cyclin-dependent kinase 1 OS=Homo sapiens GN=CDK1 PE=1 SV=3	0	36.965	40	11	14	10	1	297	34.1	8.4	17.69	11
FALSE	High	Master Protein	Q92974	Rho guanine nucleotide exchange factor 2 OS=Homo sapiens GN=ARHGEF2 PE=1 SV=4	0	40.41	14	10	10	10	1	986	111.5	7.27	19.98	10
FALSE	High	Master Protein	Q15691	Microtubule-associated protein RP/EB family member 1 OS=Homo sapiens GN=MAPRE1 PE=1 SV=3	0	49.504	59	10	15	10	1	268	30	5.14	22.69	10
FALSE	High	Master Protein	Q06830	Peroxiredoxin-1 OS=Homo sapiens GN=PRDX1 PE=1 SV=1	0	84.802	63	13	41	10	1	199	22.1	8.13	75.99	13
FALSE	High	Master Protein	P07910	Heterogeneous nuclear ribonucleoproteins C1/C2 OS=Homo sapiens GN=HNRNPC PE=1 SV=4	0	55.116	26	10	28	10	1	306	33.7	5.08	46.28	10
FALSE	High	Master Protein	P0DMV9	Heat shock 70 kDa protein 1B OS=Homo sapiens GN=HSPA1B PE=1 SV=1	0	46.442	25	11	16	10	1	641	70	5.66	25.18	11
FALSE	High	Master Protein	P41091	Eukaryotic translation initiation factor 2 subunit 3 OS=Homo sapiens GN=EIF2S3 PE=1 SV=3	0	48.912	33	10	15	10	1	472	51.1	8.4	25.69	10
FALSE	High	Master Protein	P63104	14-3-3 protein zeta/delta OS=Homo sapiens GN=YWHAZ PE=1 SV=1	0	76.11	55	12	31	10	1	245	27.7	4.79	53.04	12
FALSE	High	Master Protein	Q8N1F7	Nuclear pore complex protein Nup93 OS=Homo sapiens GN=NUP93 PE=1 SV=2	0	37.964	20	10	10	10	1	819	93.4	5.72	14.31	10
FALSE	High	Master Protein	P33176	Kinesin-1 heavy chain OS=Homo sapiens GN=KIF5B PE=1 SV=1	0	32.634	15	10	10	10	1	963	109.6	6.51	10.57	10
FALSE	High	Master Protein	Q16181	Septin-7 OS=Homo sapiens GN=SEPT7 PE=1 SV=2	0	42.912	35	11	14	10	1	437	50.6	8.63	19.01	11
FALSE	High	Master Protein	P47897	Glutamine--tRNA ligase OS=Homo sapiens GN=QARS PE=1 SV=1	0	31.35	17	10	11	10	1	775	87.7	7.15	10.01	10
FALSE	High	Master Protein	O00151	PDZ and LIM domain protein 1 OS=Homo sapiens GN=PDLIM1 PE=1 SV=4	0	43.717	44	10	11	10	1	329	36	7.02	19.14	10
FALSE	High	Master Protein	P51659	Peroxisomal multifunctional enzyme type 2 OS=Homo sapiens GN=HSD17B4 PE=1 SV=3	0	46.702	20	10	11	10	1	736	79.6	8.84	22.74	10
FALSE	High	Master Protein	Q15046	Lysine--tRNA ligase OS=Homo sapiens GN=KARS PE=1 SV=3	0	41.124	22	10	11	10	1	597	68	6.35	20.8	10
FALSE	High	Master Protein	Q92608	Dedicator of cytokinesis protein 2 OS=Homo sapiens GN=DOCK2 PE=1 SV=2	0	40.268	8	10	10	10	1	1830	211.8	6.87	16.61	10
FALSE	High	Master Protein	Q13283	Ras GTPase-activating protein-binding protein 1 OS=Homo sapiens GN=G3BP1 PE=1 SV=1	0	37.835	28	9	15	9	1	466	52.1	5.52	14.96	9
FALSE	High	Master Protein	Q13045	Protein flightless-1 homolog OS=Homo sapiens GN=FLII PE=1 SV=2	0	31.755	11	9	9	9	1	1269	144.7	6.05	10.2	9
FALSE	High	Master Protein	Q9BWD1	Acetyl-CoA acetyltransferase, cytosolic OS=Homo sapiens GN=ACAT2 PE=1 SV=2	0	53.456	53	9	16	9	1	397	41.3	6.92	20.17	9
FALSE	High	Master Protein	P09211	Glutathione S-transferase P OS=Homo sapiens GN=GSTP1 PE=1 SV=2	0	105.496	64	9	34	9	1	210	23.3	5.64	68.73	9
FALSE	High	Master Protein	Q7L014	Probable ATP-dependent RNA helicase DDX46 OS=Homo sapiens GN=DDX46 PE=1 SV=2	0	26.676	10	9	9	9	1	1031	117.3	9.29	16.74	9
FALSE	High	Master Protein	P15880	40S ribosomal protein S2 OS=Homo sapiens GN=RPS2 PE=1 SV=2	0	45.594	32	9	22	9	1	293	31.3	10.24	32.22	9
FALSE	High	Master Protein	Q04637	Eukaryotic translation initiation factor 4 gamma 1 OS=Homo sapiens GN=EIF4G1 PE=1 SV=4	0	35.029	10	9	10	9	1	1599	175.4	5.33	9.19	9
FALSE	High	Master Protein	P05198	Eukaryotic translation initiation factor 2 subunit 1 OS=Homo sapiens GN=EIF2S1 PE=1 SV=3	0	33.121	33	9	12	9	1	315	36.1	5.08	9.78	9
FALSE	High	Master Protein	P25786	Proteasome subunit alpha type-1 OS=Homo sapiens GN=PSMA1 PE=1 SV=1	0	35.378	48	9	14	9	1	263	29.5	6.61	10.96	9
FALSE	High	Master Protein	Q96PK6	RNA-binding protein 14 OS=Homo sapiens GN=RBM14 PE=1 SV=2	0	36.801	18	9	13	9	1	669	69.4	9.67	13.99	9
FALSE	High	Master Protein	P15924	Desmoplakin OS=Homo sapiens GN=DSP PE=1 SV=3	0	29.786	4	9	11	9	1	2871	331.6	6.81	10.97	9
FALSE	High	Master Protein	P61160	Actin-related protein 2 OS=Homo sapiens GN=ACTR2 PE=1 SV=1	0	47.406	26	9	13	9	1	394	44.7	6.74	23.38	9
FALSE	High	Master Protein	Q15365	Poly(rC)-binding protein 1 OS=Homo sapiens GN=PCBP1 PE=1 SV=2	0	99.564	60	10	25	9	1	356	37.5	7.09	59.95	10
FALSE	High	Master Protein	Q16643	Drebrin OS=Homo sapiens GN=DBN1 PE=1 SV=4	0	47.769	28	9	12	9	1	649	71.4	4.45	15.3	9
FALSE	High	Master Protein	Q15084	Protein disulfide-isomerase A6 OS=Homo sapiens GN=PDIA6 PE=1 SV=1	0	48.259	30	9	14	9	1	440	48.1	5.08	25.39	9
FALSE	High	Master Protein	P52209	6-phosphogluconate dehydrogenase, decarboxylating OS=Homo sapiens GN=PGD PE=1 SV=3	0	34.783	22	9	17	9	1	483	53.1	7.23	24.27	9
FALSE	High	Master Protein	P09972	Fructose-bisphosphate aldolase C OS=Homo sapiens GN=ALDOC PE=1 SV=2	0	79.563	43	11	24	9	1	364	39.4	6.87	44.62	11
FALSE	High	Master Protein	P62701	40S ribosomal protein S4, X isoform OS=Homo sapiens GN=RPS4X PE=1 SV=2	0	62.132	46	11	22	9	1	263	29.6	10.15	37.57	11
FALSE	High	Master Protein	Q9NQW7	Xaa-Pro aminopeptidase 1 OS=Homo sapiens GN=XPNPEP1 PE=1 SV=3	0	36.908	25	9	10	9	1	623	69.9	5.67	9.83	9
FALSE	High	Master Protein	P40939	Trifunctional enzyme subunit alpha, mitochondrial OS=Homo sapiens GN=HADHA PE=1 SV=2	0	38.618	19	9	10	9	1	763	82.9	9.04	13.94	9
FALSE	High	Master Protein	P55209	Nucleosome assembly protein 1-like 1 OS=Homo sapiens GN=NAP1L1 PE=1 SV=1	0	59.473	45	11	17	9	1	391	45.3	4.46	21.01	11
FALSE	High	Master Protein	P02786	Transferrin receptor protein 1 OS=Homo sapiens GN=TFRC PE=1 SV=2	0	35.712	14	9	11	9	1	760	84.8	6.61	15.2	9
FALSE	High	Master Protein	P46777	60S ribosomal protein L5 OS=Homo sapiens GN=RPL5 PE=1 SV=3	0	71.435	44	9	28	9	1	297	34.3	9.72	41.62	9
FALSE	High	Master Protein	P62906	60S ribosomal protein L10a OS=Homo sapiens GN=RPL10A PE=1 SV=2	0	54.92	39	9	19	9	1	217	24.8	9.94	18.29	9
FALSE	High	Master Protein	P08708	40S ribosomal protein S17 OS=Homo sapiens GN=RPS17 PE=1 SV=2	0	62.736	53	9	25	9	1	135	15.5	9.85	32.32	9
FALSE	High	Master Protein	P62241	40S ribosomal protein S8 OS=Homo sapiens GN=RPS8 PE=1 SV=2	0	46.315	49	9	20	9	1	208	24.2	10.32	43.47	9
FALSE	High	Master Protein	P34897	Serine hydroxymethyltransferase, mitochondrial OS=Homo sapiens GN=SHMT2 PE=1 SV=3	0	48.307	31	10	13	9	1	504	56	8.53	21.2	10
FALSE	High	Master Protein	P30153	Serine/threonine-protein phosphatase 2A 65 kDa regulatory subunit A alpha isoform OS=Homo sapiens GN=PPP2R1A PE=1 SV=4	0	44.617	26	12	15	9	1	589	65.3	5.11	13.58	12
FALSE	High	Master Protein	P46013	Proliferation marker protein Ki-67 OS=Homo sapiens GN=MKI67 PE=1 SV=2	0	24.733	5	9	9	9	1	3256	358.5	9.45	3.99	9
FALSE	High	Master Protein	P27695	DNA-(apurinic or apyrimidinic site) lyase OS=Homo sapiens GN=APEX1 PE=1 SV=2	0	36.607	41	9	11	9	1	318	35.5	8.12	20.77	9
FALSE	High	Master Protein	P09651	Heterogeneous nuclear ribonucleoprotein A1 OS=Homo sapiens GN=HNRNPA1 PE=1 SV=5	0	79.777	31	10	43	9	1	372	38.7	9.13	90.77	10
FALSE	High	Master Protein	O14818	Proteasome subunit alpha type-7 OS=Homo sapiens GN=PSMA7 PE=1 SV=1	0	49.079	42	9	14	9	1	248	27.9	8.46	24.27	9
FALSE	High	Master Protein	P00390	Glutathione reductase, mitochondrial OS=Homo sapiens GN=GSR PE=1 SV=2	0	52.274	34	9	11	9	1	522	56.2	8.5	24.88	9
FALSE	High	Master Protein	P14314	Glucosidase 2 subunit beta OS=Homo sapiens GN=PRKCSH PE=1 SV=2	0	30.209	17	9	11	9	1	528	59.4	4.41	5.27	9
FALSE	High	Master Protein	O94776	Metastasis-associated protein MTA2 OS=Homo sapiens GN=MTA2 PE=1 SV=1	0	36.345	24	11	12	9	1	668	75	9.66	11.95	11
FALSE	High	Master Protein	Q06323	Proteasome activator complex subunit 1 OS=Homo sapiens GN=PSME1 PE=1 SV=1	0	33.953	45	9	12	9	1	249	28.7	6.02	16.06	9
FALSE	High	Master Protein	O75367	Core histone macro-H2A.1 OS=Homo sapiens GN=H2AFY PE=1 SV=4	0	53.927	35	9	14	9	1	372	39.6	9.79	36.8	9
FALSE	High	Master Protein	P62937	Peptidyl-prolyl cis-trans isomerase A OS=Homo sapiens GN=PPIA PE=1 SV=2	0	92.365	56	9	84	9	1	165	18	7.81	154.47	9
FALSE	High	Master Protein	Q9Y230	RuvB-like 2 OS=Homo sapiens GN=RUVBL2 PE=1 SV=3	0	35.445	27	9	13	9	1	463	51.1	5.64	16.83	9
FALSE	High	Master Protein	P42704	Leucine-rich PPR motif-containing protein, mitochondrial OS=Homo sapiens GN=LRPPRC PE=1 SV=3	0	27.953	10	9	10	9	1	1394	157.8	6.13	5.06	9
FALSE	High	Master Protein	P51991	Heterogeneous nuclear ribonucleoprotein A3 OS=Homo sapiens GN=HNRNPA3 PE=1 SV=2	0	49.557	35	10	20	9	1	378	39.6	9.01	27.32	10
FALSE	High	Master Protein	Q99497	Protein DJ-1 OS=Homo sapiens GN=PARK7 PE=1 SV=2	0	67.136	58	9	22	9	1	189	19.9	6.79	45.16	9
FALSE	High	Master Protein	Q9BY44	Eukaryotic translation initiation factor 2A OS=Homo sapiens GN=EIF2A PE=1 SV=3	0	25.821	20	9	9	9	1	585	64.9	8.87	7.98	9
FALSE	High	Master Protein	P12081	Histidine--tRNA ligase, cytoplasmic OS=Homo sapiens GN=HARS PE=1 SV=2	0	26.482	22	9	10	9	1	509	57.4	5.88	12.84	9
FALSE	High	Master Protein	Q8IY81	pre-rRNA processing protein FTSJ3 OS=Homo sapiens GN=FTSJ3 PE=1 SV=2	0	30.707	18	9	9	9	1	847	96.5	8.4	11.18	9
FALSE	High	Master Protein	O43776	Asparagine--tRNA ligase, cytoplasmic OS=Homo sapiens GN=NARS PE=1 SV=1	0	35.182	22	9	11	9	1	548	62.9	6.25	5.86	9
FALSE	High	Master Protein	P48147	Prolyl endopeptidase OS=Homo sapiens GN=PREP PE=1 SV=2	0	30.469	18	8	9	8	1	710	80.6	5.86	11.51	8
FALSE	High	Master Protein	P30086	Phosphatidylethanolamine-binding protein 1 OS=Homo sapiens GN=PEBP1 PE=1 SV=3	0	52.361	62	8	15	8	1	187	21	7.53	33.45	8
FALSE	High	Master Protein	Q9NYU2	UDP-glucose:glycoprotein glucosyltransferase 1 OS=Homo sapiens GN=UGGT1 PE=1 SV=3	0	32.84	9	8	8	8	1	1555	177.1	5.63	11.08	8
FALSE	High	Master Protein	P17980	26S protease regulatory subunit 6A OS=Homo sapiens GN=PSMC3 PE=1 SV=3	0	29.084	31	8	9	8	1	439	49.2	5.24	7.22	8
FALSE	High	Master Protein	P84095	Rho-related GTP-binding protein RhoG OS=Homo sapiens GN=RHOG PE=1 SV=1	0	45.127	53	8	11	8	1	191	21.3	8.12	22.58	8
FALSE	High	Master Protein	P50995	Annexin A11 OS=Homo sapiens GN=ANXA11 PE=1 SV=1	0	21.12	21	8	8	8	1	505	54.4	7.65	8.45	8
FALSE	High	Master Protein	O43242	26S proteasome non-ATPase regulatory subunit 3 OS=Homo sapiens GN=PSMD3 PE=1 SV=2	0	30.045	20	8	8	8	1	534	60.9	8.44	11.39	8
FALSE	High	Master Protein	P13798	Acylamino-acid-releasing enzyme OS=Homo sapiens GN=APEH PE=1 SV=4	0	35.444	16	8	8	8	1	732	81.2	5.48	17.04	8
FALSE	High	Master Protein	P24666	Low molecular weight phosphotyrosine protein phosphatase OS=Homo sapiens GN=ACP1 PE=1 SV=3	0	29.715	66	8	8	8	1	158	18	6.74	13.59	8
FALSE	High	Master Protein	P39748	Flap endonuclease 1 OS=Homo sapiens GN=FEN1 PE=1 SV=1	0	33.364	34	8	9	8	1	380	42.6	8.62	11.5	8
FALSE	High	Master Protein	Q99873	Protein arginine N-methyltransferase 1 OS=Homo sapiens GN=PRMT1 PE=1 SV=2	0	38.884	31	8	9	8	1	361	41.5	5.43	17.5	8
FALSE	High	Master Protein	Q15181	Inorganic pyrophosphatase OS=Homo sapiens GN=PPA1 PE=1 SV=2	0	37.102	40	9	15	8	1	289	32.6	5.86	21.26	9
FALSE	High	Master Protein	O00154	Cytosolic acyl coenzyme A thioester hydrolase OS=Homo sapiens GN=ACOT7 PE=1 SV=3	0	50.414	30	8	17	8	1	380	41.8	8.54	25	8
FALSE	High	Master Protein	P32119	Peroxiredoxin-2 OS=Homo sapiens GN=PRDX2 PE=1 SV=5	0	42.294	46	9	17	8	1	198	21.9	5.97	35.4	9
FALSE	High	Master Protein	Q12931	Heat shock protein 75 kDa, mitochondrial OS=Homo sapiens GN=TRAP1 PE=1 SV=3	0	35.793	20	9	14	8	1	704	80.1	8.21	28.56	9
FALSE	High	Master Protein	Q8WYJ6	Septin-1 OS=Homo sapiens GN=SEPT1 PE=1 SV=2	0	27.205	30	8	8	8	1	367	41.9	5.8	7.59	8
FALSE	High	Master Protein	Q9H0A0	RNA cytidine acetyltransferase OS=Homo sapiens GN=NAT10 PE=1 SV=2	0	23.644	14	8	8	8	1	1025	115.7	8.27	4.81	8
FALSE	High	Master Protein	P30044	Peroxiredoxin-5, mitochondrial OS=Homo sapiens GN=PRDX5 PE=1 SV=4	0	29.768	46	8	11	8	1	214	22.1	8.7	13.92	8
FALSE	High	Master Protein	P11310	Medium-chain specific acyl-CoA dehydrogenase, mitochondrial OS=Homo sapiens GN=ACADM PE=1 SV=1	0	30.066	29	8	10	8	1	421	46.6	8.37	16.2	8
FALSE	High	Master Protein	P40121	Macrophage-capping protein OS=Homo sapiens GN=CAPG PE=1 SV=2	0	51.984	42	8	16	8	1	348	38.5	6.19	30.92	8
FALSE	High	Master Protein	P62495	Eukaryotic peptide chain release factor subunit 1 OS=Homo sapiens GN=ETF1 PE=1 SV=3	0	34.859	28	8	9	8	1	437	49	5.71	11.33	8
FALSE	High	Master Protein	O00299	Chloride intracellular channel protein 1 OS=Homo sapiens GN=CLIC1 PE=1 SV=4	0	44.618	44	8	12	8	1	241	26.9	5.17	26.41	8
FALSE	High	Master Protein	P24752	Acetyl-CoA acetyltransferase, mitochondrial OS=Homo sapiens GN=ACAT1 PE=1 SV=1	0	35.43	33	8	9	8	1	427	45.2	8.85	14.12	8
FALSE	High	Master Protein	O76021	Ribosomal L1 domain-containing protein 1 OS=Homo sapiens GN=RSL1D1 PE=1 SV=3	0	29.664	18	8	10	8	1	490	54.9	10.13	9.51	8
FALSE	High	Master Protein	Q96KP4	Cytosolic non-specific dipeptidase OS=Homo sapiens GN=CNDP2 PE=1 SV=2	0	30.713	26	8	9	8	1	475	52.8	5.97	6.19	8
FALSE	High	Master Protein	Q16891	MICOS complex subunit MIC60 OS=Homo sapiens GN=IMMT PE=1 SV=1	0	30.077	17	8	8	8	1	758	83.6	6.48	7.05	8
FALSE	High	Master Protein	P00492	Hypoxanthine-guanine phosphoribosyltransferase OS=Homo sapiens GN=HPRT1 PE=1 SV=2	0	42.693	53	8	11	8	1	218	24.6	6.68	15.71	8
FALSE	High	Master Protein	P07954	Fumarate hydratase, mitochondrial OS=Homo sapiens GN=FH PE=1 SV=3	0	43.249	32	8	10	8	1	510	54.6	8.76	24.17	8
FALSE	High	Master Protein	Q9UMS4	Pre-mRNA-processing factor 19 OS=Homo sapiens GN=PRPF19 PE=1 SV=1	0	54.721	34	8	15	8	1	504	55.1	6.61	25.76	8
FALSE	High	Master Protein	Q12788	Transducin beta-like protein 3 OS=Homo sapiens GN=TBL3 PE=1 SV=2	0	29.167	18	8	8	8	1	808	89	6.9	6.49	8
FALSE	High	Master Protein	P27824	Calnexin OS=Homo sapiens GN=CANX PE=1 SV=2	0	30.229	17	8	12	8	1	592	67.5	4.6	11.23	8
FALSE	High	Master Protein	P18754	Regulator of chromosome condensation OS=Homo sapiens GN=RCC1 PE=1 SV=1	0	42.676	37	8	9	8	1	421	44.9	7.52	16.09	8
FALSE	High	Master Protein	P31040	Succinate dehydrogenase [ubiquinone] flavoprotein subunit, mitochondrial OS=Homo sapiens GN=SDHA PE=1 SV=2	0	40.224	23	8	9	8	1	664	72.6	7.39	12.53	8
FALSE	High	Master Protein	P46781	40S ribosomal protein S9 OS=Homo sapiens GN=RPS9 PE=1 SV=3	0	22.905	29	8	11	8	1	194	22.6	10.65	19.85	8
FALSE	High	Master Protein	Q9Y3I0	tRNA-splicing ligase RtcB homolog OS=Homo sapiens GN=RTCB PE=1 SV=1	0	29.516	25	8	8	8	1	505	55.2	7.23	9.34	8
FALSE	High	Master Protein	Q06210	Glutamine--fructose-6-phosphate aminotransferase [isomerizing] 1 OS=Homo sapiens GN=GFPT1 PE=1 SV=3	0	34.427	17	8	8	8	1	699	78.8	7.11	16.61	8
FALSE	High	Master Protein	P38919	Eukaryotic initiation factor 4A-III OS=Homo sapiens GN=EIF4A3 PE=1 SV=4	0	54.997	35	10	15	8	1	411	46.8	6.73	24.63	10
FALSE	High	Master Protein	P45880	Voltage-dependent anion-selective channel protein 2 OS=Homo sapiens GN=VDAC2 PE=1 SV=2	0	37.611	41	8	14	8	1	294	31.5	7.56	24.27	8
FALSE	High	Master Protein	P62081	40S ribosomal protein S7 OS=Homo sapiens GN=RPS7 PE=1 SV=1	0	20.388	50	8	12	8	1	194	22.1	10.1	19.64	8
FALSE	High	Master Protein	P46087	Probable 28S rRNA (cytosine(4447)-C(5))-methyltransferase OS=Homo sapiens GN=NOP2 PE=1 SV=2	0	34.822	12	8	8	8	1	812	89.2	9.23	20.51	8
FALSE	High	Master Protein	O15144	Actin-related protein 2/3 complex subunit 2 OS=Homo sapiens GN=ARPC2 PE=1 SV=1	0	21.075	35	8	9	8	1	300	34.3	7.36	4.73	8
FALSE	High	Master Protein	P62753	40S ribosomal protein S6 OS=Homo sapiens GN=RPS6 PE=1 SV=1	0	62.53	31	8	20	8	1	249	28.7	10.84	38.88	8
FALSE	High	Master Protein	Q9UBB4	Ataxin-10 OS=Homo sapiens GN=ATXN10 PE=1 SV=1	0	34.392	23	8	8	8	1	475	53.5	5.25	12.97	8
FALSE	High	Master Protein	P00491	Purine nucleoside phosphorylase OS=Homo sapiens GN=PNP PE=1 SV=2	0	50.864	40	8	13	8	1	289	32.1	6.95	25.31	8
FALSE	High	Master Protein	P11766	Alcohol dehydrogenase class-3 OS=Homo sapiens GN=ADH5 PE=1 SV=4	0	51.814	43	8	12	8	1	374	39.7	7.49	21.04	8
FALSE	High	Master Protein	Q7Z2W4	Zinc finger CCCH-type antiviral protein 1 OS=Homo sapiens GN=ZC3HAV1 PE=1 SV=3	0	27.692	16	8	8	8	1	902	101.4	8.4	12.26	8
FALSE	High	Master Protein	P27816	Microtubule-associated protein 4 OS=Homo sapiens GN=MAP4 PE=1 SV=3	0	28.706	11	8	8	8	1	1152	120.9	5.43	9.2	8
FALSE	High	Master Protein	Q9Y2W1	Thyroid hormone receptor-associated protein 3 OS=Homo sapiens GN=THRAP3 PE=1 SV=2	0	32.788	10	8	10	8	1	955	108.6	10.15	8.25	8
FALSE	High	Master Protein	Q15424	Scaffold attachment factor B1 OS=Homo sapiens GN=SAFB PE=1 SV=4	0	38.667	14	8	9	8	1	915	102.6	5.47	20.2	8
FALSE	High	Master Protein	Q9UJZ1	Stomatin-like protein 2, mitochondrial OS=Homo sapiens GN=STOML2 PE=1 SV=1	0	40.672	40	8	9	8	1	356	38.5	7.39	18.89	8
FALSE	High	Master Protein	Q96AE4	Far upstream element-binding protein 1 OS=Homo sapiens GN=FUBP1 PE=1 SV=3	0	45.188	22	10	17	8	1	644	67.5	7.61	19.22	10
FALSE	High	Master Protein	P55060	Exportin-2 OS=Homo sapiens GN=CSE1L PE=1 SV=3	0	32.984	11	8	10	8	1	971	110.3	5.77	8.65	8
FALSE	High	Master Protein	P16401	Histone H1.5 OS=Homo sapiens GN=HIST1H1B PE=1 SV=3	0	37.435	18	8	23	8	1	226	22.6	10.92	43.23	8
FALSE	High	Master Protein	P10768	S-formylglutathione hydrolase OS=Homo sapiens GN=ESD PE=1 SV=2	0	49.878	54	8	20	8	1	282	31.4	7.02	16.2	8
FALSE	High	Master Protein	P13647	Keratin, type II cytoskeletal 5 OS=Homo sapiens GN=KRT5 PE=1 SV=3	0	88.799	27	17	39	8	1	590	62.3	7.74	66.68	17
FALSE	High	Master Protein	P09622	Dihydrolipoyl dehydrogenase, mitochondrial OS=Homo sapiens GN=DLD PE=1 SV=2	0	30.643	22	8	8	8	1	509	54.1	7.85	7.3	8
FALSE	High	Master Protein	O95433	Activator of 90 kDa heat shock protein ATPase homolog 1 OS=Homo sapiens GN=AHSA1 PE=1 SV=1	0	34.704	34	8	12	8	1	338	38.3	5.53	17.82	8
FALSE	High	Master Protein	P60900	Proteasome subunit alpha type-6 OS=Homo sapiens GN=PSMA6 PE=1 SV=1	0	32.613	53	8	11	8	1	246	27.4	6.76	17.88	8
FALSE	High	Master Protein	Q9UQ35	Serine/arginine repetitive matrix protein 2 OS=Homo sapiens GN=SRRM2 PE=1 SV=2	0	34.968	5	8	9	8	1	2752	299.4	12.06	13.92	8
FALSE	High	Master Protein	P53618	Coatomer subunit beta OS=Homo sapiens GN=COPB1 PE=1 SV=3	0	27.079	14	8	8	8	1	953	107.1	6.05	5.95	8
FALSE	High	Master Protein	Q9Y617	Phosphoserine aminotransferase OS=Homo sapiens GN=PSAT1 PE=1 SV=2	0	29.483	27	8	8	8	1	370	40.4	7.66	12.46	8
FALSE	High	Master Protein	P07737	Profilin-1 OS=Homo sapiens GN=PFN1 PE=1 SV=2	0	71.905	61	8	59	8	1	140	15	8.27	109.92	8
FALSE	High	Master Protein	Q9BT78	COP9 signalosome complex subunit 4 OS=Homo sapiens GN=COPS4 PE=1 SV=1	0	31.905	32	8	8	8	1	406	46.2	5.83	14.24	8
FALSE	High	Master Protein	P61088	Ubiquitin-conjugating enzyme E2 N OS=Homo sapiens GN=UBE2N PE=1 SV=1	0	31.285	65	8	13	8	1	152	17.1	6.57	21.51	8
FALSE	High	Master Protein	Q99714	3-hydroxyacyl-CoA dehydrogenase type-2 OS=Homo sapiens GN=HSD17B10 PE=1 SV=3	0	47.969	51	8	12	8	1	261	26.9	7.78	22.29	8
FALSE	High	Master Protein	P06239	Tyrosine-protein kinase Lck OS=Homo sapiens GN=LCK PE=1 SV=6	0	27.297	25	9	13	8	1	509	58	5.36	11.15	9
FALSE	High	Master Protein	P05455	Lupus La protein OS=Homo sapiens GN=SSB PE=1 SV=2	0	28.933	22	8	11	8	1	408	46.8	7.12	9.29	8
FALSE	High	Master Protein	P30041	Peroxiredoxin-6 OS=Homo sapiens GN=PRDX6 PE=1 SV=3	0	24.457	41	7	11	7	1	224	25	6.38	13.64	7
FALSE	High	Master Protein	Q06203	Amidophosphoribosyltransferase OS=Homo sapiens GN=PPAT PE=1 SV=1	0	31.514	22	7	7	7	1	517	57.4	6.76	13.52	7
FALSE	High	Master Protein	O14950	Myosin regulatory light chain 12B OS=Homo sapiens GN=MYL12B PE=1 SV=2	0	40.642	52	7	12	7	1	172	19.8	4.84	27.69	7
FALSE	High	Master Protein	P15311	Ezrin OS=Homo sapiens GN=EZR PE=1 SV=4	0	67.501	31	16	31	7	1	586	69.4	6.27	47.3	16
FALSE	High	Master Protein	Q9UKM9	RNA-binding protein Raly OS=Homo sapiens GN=RALY PE=1 SV=1	0	29.444	22	7	11	7	1	306	32.4	9.17	14.38	7
FALSE	High	Master Protein	P42166	Lamina-associated polypeptide 2, isoform alpha OS=Homo sapiens GN=TMPO PE=1 SV=2	0	69.894	34	14	16	7	1	694	75.4	7.66	32.89	14
FALSE	High	Master Protein	P30050	60S ribosomal protein L12 OS=Homo sapiens GN=RPL12 PE=1 SV=1	0	36.123	55	7	16	7	1	165	17.8	9.42	32.53	7
FALSE	High	Master Protein	P38606	V-type proton ATPase catalytic subunit A OS=Homo sapiens GN=ATP6V1A PE=1 SV=2	0	25.848	21	7	7	7	1	617	68.3	5.52	8.58	7
FALSE	High	Master Protein	Q14152	Eukaryotic translation initiation factor 3 subunit A OS=Homo sapiens GN=EIF3A PE=1 SV=1	0	23.629	6	7	8	7	1	1382	166.5	6.79	10.83	7
FALSE	High	Master Protein	P10515	Dihydrolipoyllysine-residue acetyltransferase component of pyruvate dehydrogenase complex, mitochondrial OS=Homo sapiens GN=DLAT PE=1 SV=3	0	29.612	16	7	8	7	1	647	69	7.84	10.47	7
FALSE	High	Master Protein	O43837	Isocitrate dehydrogenase [NAD] subunit beta, mitochondrial OS=Homo sapiens GN=IDH3B PE=1 SV=2	0	25.723	27	7	9	7	1	385	42.2	8.46	5.78	7
FALSE	High	Master Protein	Q99459	Cell division cycle 5-like protein OS=Homo sapiens GN=CDC5L PE=1 SV=2	0	28.474	15	7	7	7	1	802	92.2	8.18	10.36	7
FALSE	High	Master Protein	O00170	AH receptor-interacting protein OS=Homo sapiens GN=AIP PE=1 SV=2	0	32.265	30	7	9	7	1	330	37.6	6.29	20.58	7
FALSE	High	Master Protein	Q9UHD1	Cysteine and histidine-rich domain-containing protein 1 OS=Homo sapiens GN=CHORDC1 PE=1 SV=2	0	31.741	28	7	9	7	1	332	37.5	7.87	6.52	7
FALSE	High	Master Protein	P78406	mRNA export factor OS=Homo sapiens GN=RAE1 PE=1 SV=1	0	22.082	29	7	7	7	1	368	40.9	7.83	7.17	7
FALSE	High	Master Protein	Q15027	Arf-GAP with coiled-coil, ANK repeat and PH domain-containing protein 1 OS=Homo sapiens GN=ACAP1 PE=1 SV=1	0	22.62	13	7	8	7	1	740	81.5	7.66	10.22	7
FALSE	High	Master Protein	O14980	Exportin-1 OS=Homo sapiens GN=XPO1 PE=1 SV=1	0	27.676	9	7	7	7	1	1071	123.3	6.06	10.54	7
FALSE	High	Master Protein	P78347	General transcription factor II-I OS=Homo sapiens GN=GTF2I PE=1 SV=2	0	23.245	9	7	7	7	1	998	112.3	6.39	7.38	7
FALSE	High	Master Protein	P16402	Histone H1.3 OS=Homo sapiens GN=HIST1H1D PE=1 SV=2	0	47.537	17	7	25	7	1	221	22.3	11.02	47.2	7
FALSE	High	Master Protein	P62826	GTP-binding nuclear protein Ran OS=Homo sapiens GN=RAN PE=1 SV=3	0	35.132	48	7	17	7	1	216	24.4	7.49	21.51	7
FALSE	High	Master Protein	O00232	26S proteasome non-ATPase regulatory subunit 12 OS=Homo sapiens GN=PSMD12 PE=1 SV=3	0	30.325	23	7	7	7	1	456	52.9	7.65	12.66	7
FALSE	High	Master Protein	P35232	Prohibitin OS=Homo sapiens GN=PHB PE=1 SV=1	0	36.715	33	7	11	7	1	272	29.8	5.76	23.59	7
FALSE	High	Master Protein	P51858	Hepatoma-derived growth factor OS=Homo sapiens GN=HDGF PE=1 SV=1	0	28.464	55	8	11	7	1	240	26.8	4.73	17.68	8
FALSE	High	Master Protein	P27348	14-3-3 protein theta OS=Homo sapiens GN=YWHAQ PE=1 SV=1	0	48.875	45	9	21	7	1	245	27.7	4.78	28.29	9
FALSE	High	Master Protein	Q13310	Polyadenylate-binding protein 4 OS=Homo sapiens GN=PABPC4 PE=1 SV=1	0	64.461	24	14	21	7	1	644	70.7	9.26	30.27	14
FALSE	High	Master Protein	Q01469	Fatty acid-binding protein, epidermal OS=Homo sapiens GN=FABP5 PE=1 SV=3	0	54.662	65	7	18	7	1	135	15.2	7.01	33.55	7
FALSE	High	Master Protein	P32969	60S ribosomal protein L9 OS=Homo sapiens GN=RPL9 PE=1 SV=1	0	50.174	54	7	17	7	1	192	21.9	9.95	31.75	7
FALSE	High	Master Protein	P33316	Deoxyuridine 5'-triphosphate nucleotidohydrolase, mitochondrial OS=Homo sapiens GN=DUT PE=1 SV=4	0	30.362	38	7	12	7	1	252	26.5	9.36	21.93	7
FALSE	High	Master Protein	Q03252	Lamin-B2 OS=Homo sapiens GN=LMNB2 PE=1 SV=4	0	25.729	16	8	8	7	1	620	69.9	5.59	9.96	8
FALSE	High	Master Protein	P37837	Transaldolase OS=Homo sapiens GN=TALDO1 PE=1 SV=2	0	17.678	22	7	10	7	1	337	37.5	6.81	12.03	7
FALSE	High	Master Protein	P62249	40S ribosomal protein S16 OS=Homo sapiens GN=RPS16 PE=1 SV=2	0	30.635	44	7	17	7	1	146	16.4	10.21	25.21	7
FALSE	High	Master Protein	P28340	DNA polymerase delta catalytic subunit OS=Homo sapiens GN=POLD1 PE=1 SV=2	0	20.35	7	7	7	7	1	1107	123.6	7.03	4.09	7
FALSE	High	Master Protein	P36542	ATP synthase subunit gamma, mitochondrial OS=Homo sapiens GN=ATP5C1 PE=1 SV=1	0	24.575	28	7	8	7	1	298	33	9.22	11.46	7
FALSE	High	Master Protein	P61106	Ras-related protein Rab-14 OS=Homo sapiens GN=RAB14 PE=1 SV=4	0	29.996	46	7	7	7	1	215	23.9	6.21	15.7	7
FALSE	High	Master Protein	P20618	Proteasome subunit beta type-1 OS=Homo sapiens GN=PSMB1 PE=1 SV=2	0	33.068	36	7	10	7	1	241	26.5	8.13	12.09	7
FALSE	High	Master Protein	Q9NUQ9	Protein FAM49B OS=Homo sapiens GN=FAM49B PE=1 SV=1	0	31.682	32	7	9	7	1	324	36.7	6.06	11.86	7
FALSE	High	Master Protein	P43403	Tyrosine-protein kinase ZAP-70 OS=Homo sapiens GN=ZAP70 PE=1 SV=1	0	26.64	18	7	8	7	1	619	69.8	7.69	11.91	7
FALSE	High	Master Protein	P78344	Eukaryotic translation initiation factor 4 gamma 2 OS=Homo sapiens GN=EIF4G2 PE=1 SV=1	0	26.504	11	7	8	7	1	907	102.3	7.14	10.18	7
FALSE	High	Master Protein	P17480	Nucleolar transcription factor 1 OS=Homo sapiens GN=UBTF PE=1 SV=1	0	18.52	11	7	7	7	1	764	89.4	5.81	7.26	7
FALSE	High	Master Protein	P54577	Tyrosine--tRNA ligase, cytoplasmic OS=Homo sapiens GN=YARS PE=1 SV=4	0	24.671	16	7	8	7	1	528	59.1	7.05	11.9	7
FALSE	High	Master Protein	Q92888	Rho guanine nucleotide exchange factor 1 OS=Homo sapiens GN=ARHGEF1 PE=1 SV=2	0	21.114	13	7	7	7	1	912	102.4	5.66	8.09	7
FALSE	High	Master Protein	Q8N684	Cleavage and polyadenylation specificity factor subunit 7 OS=Homo sapiens GN=CPSF7 PE=1 SV=1	0	25.464	22	7	7	7	1	471	52	8	10.32	7
FALSE	High	Master Protein	P43490	Nicotinamide phosphoribosyltransferase OS=Homo sapiens GN=NAMPT PE=1 SV=1	0	23.211	18	7	8	7	1	491	55.5	7.15	7.04	7
FALSE	High	Master Protein	P50502	Hsc70-interacting protein OS=Homo sapiens GN=ST13 PE=1 SV=2	0	26.255	19	7	11	7	1	369	41.3	5.27	15.53	7
FALSE	High	Master Protein	Q6UB35	Monofunctional C1-tetrahydrofolate synthase, mitochondrial OS=Homo sapiens GN=MTHFD1L PE=1 SV=1	0	16.019	8	7	7	7	1	978	105.7	8.06	2.41	7
FALSE	High	Master Protein	P09960	Leukotriene A-4 hydrolase OS=Homo sapiens GN=LTA4H PE=1 SV=2	0	17.735	16	7	7	7	1	611	69.2	6.18	4.55	7
FALSE	High	Master Protein	P48047	ATP synthase subunit O, mitochondrial OS=Homo sapiens GN=ATP5O PE=1 SV=1	0	30.585	50	7	10	7	1	213	23.3	9.96	13.81	7
FALSE	High	Master Protein	Q9BTT0	Acidic leucine-rich nuclear phosphoprotein 32 family member E OS=Homo sapiens GN=ANP32E PE=1 SV=1	0	34.018	25	7	12	7	1	268	30.7	3.85	13.07	7
FALSE	High	Master Protein	P36776	Lon protease homolog, mitochondrial OS=Homo sapiens GN=LONP1 PE=1 SV=2	0	26.154	12	7	7	7	1	959	106.4	6.39	8.01	7
FALSE	High	Master Protein	O00567	Nucleolar protein 56 OS=Homo sapiens GN=NOP56 PE=1 SV=4	0	26.394	18	7	7	7	1	594	66	9.19	7.56	7
FALSE	High	Master Protein	P13804	Electron transfer flavoprotein subunit alpha, mitochondrial OS=Homo sapiens GN=ETFA PE=1 SV=1	0	26.67	31	7	7	7	1	333	35.1	8.38	11.07	7
FALSE	High	Master Protein	P51532	Transcription activator BRG1 OS=Homo sapiens GN=SMARCA4 PE=1 SV=2	0	26.211	5	7	7	7	1	1647	184.5	7.88	11.17	7
FALSE	High	Master Protein	Q9UKX7	Nuclear pore complex protein Nup50 OS=Homo sapiens GN=NUP50 PE=1 SV=2	0	32.224	28	7	7	7	1	468	50.1	7.06	12.19	7
FALSE	High	Master Protein	Q86XP3	ATP-dependent RNA helicase DDX42 OS=Homo sapiens GN=DDX42 PE=1 SV=1	0	22.242	13	7	7	7	1	938	102.9	7.02	4.15	7
FALSE	High	Master Protein	Q14203	Dynactin subunit 1 OS=Homo sapiens GN=DCTN1 PE=1 SV=3	0	13.249	7	7	7	7	1	1278	141.6	5.81	4.26	7
FALSE	High	Master Protein	P62244	40S ribosomal protein S15a OS=Homo sapiens GN=RPS15A PE=1 SV=2	0	30.837	59	7	15	7	1	130	14.8	10.13	17.2	7
FALSE	High	Master Protein	O14979	Heterogeneous nuclear ribonucleoprotein D-like OS=Homo sapiens GN=HNRNPDL PE=1 SV=3	0	35.659	24	9	15	7	1	420	46.4	9.57	17.5	9
FALSE	High	Master Protein	Q14839	Chromodomain-helicase-DNA-binding protein 4 OS=Homo sapiens GN=CHD4 PE=1 SV=2	0	30.464	5	7	7	7	1	1912	217.9	5.86	10.47	7
FALSE	High	Master Protein	P08195	4F2 cell-surface antigen heavy chain OS=Homo sapiens GN=SLC3A2 PE=1 SV=3	0	26.967	19	7	9	7	1	630	68	5.01	11.14	7
FALSE	High	Master Protein	P78417	Glutathione S-transferase omega-1 OS=Homo sapiens GN=GSTO1 PE=1 SV=2	0	18.757	25	7	10	7	1	241	27.5	6.6	16.17	7
FALSE	High	Master Protein	O14745	Na(+)/H(+) exchange regulatory cofactor NHE-RF1 OS=Homo sapiens GN=SLC9A3R1 PE=1 SV=4	0	30.059	35	7	9	7	1	358	38.8	5.77	18.23	7
FALSE	High	Master Protein	Q9Y224	UPF0568 protein C14orf166 OS=Homo sapiens GN=C14orf166 PE=1 SV=1	0	28.97	39	7	8	7	1	244	28.1	6.65	7.27	7
FALSE	High	Master Protein	Q07866	Kinesin light chain 1 OS=Homo sapiens GN=KLC1 PE=1 SV=2	0	22.364	15	7	7	7	1	573	65.3	6.2	5.66	7
FALSE	High	Master Protein	P31943	Heterogeneous nuclear ribonucleoprotein H OS=Homo sapiens GN=HNRNPH1 PE=1 SV=4	0	105.7	48	13	36	7	1	449	49.2	6.3	65.81	13
FALSE	High	Master Protein	Q13547	Histone deacetylase 1 OS=Homo sapiens GN=HDAC1 PE=1 SV=1	0	34.674	36	10	11	7	1	482	55.1	5.48	14.15	10
FALSE	High	Master Protein	P53999	Activated RNA polymerase II transcriptional coactivator p15 OS=Homo sapiens GN=SUB1 PE=1 SV=3	0	24.196	36	7	14	7	1	127	14.4	9.6	15.82	7
FALSE	High	Master Protein	Q99623	Prohibitin-2 OS=Homo sapiens GN=PHB2 PE=1 SV=2	0	34.264	32	7	10	7	1	299	33.3	9.83	17.41	7
FALSE	High	Master Protein	Q12904	Aminoacyl tRNA synthase complex-interacting multifunctional protein 1 OS=Homo sapiens GN=AIMP1 PE=1 SV=2	0	27.121	32	7	7	7	1	312	34.3	8.43	12.02	7
FALSE	High	Master Protein	Q96G03	Phosphoglucomutase-2 OS=Homo sapiens GN=PGM2 PE=1 SV=4	0	22.908	18	8	8	7	1	612	68.2	6.73	4.07	8
FALSE	High	Master Protein	P60660	Myosin light polypeptide 6 OS=Homo sapiens GN=MYL6 PE=1 SV=2	0	26.04	58	7	12	7	1	151	16.9	4.65	15.77	7
FALSE	High	Master Protein	Q14008	Cytoskeleton-associated protein 5 OS=Homo sapiens GN=CKAP5 PE=1 SV=3	0	20.963	6	7	7	7	1	2032	225.4	7.8	5.69	7
FALSE	High	Master Protein	P40429	60S ribosomal protein L13a OS=Homo sapiens GN=RPL13A PE=1 SV=2	0	18.994	29	7	12	7	1	203	23.6	10.93	12.85	7
FALSE	High	Master Protein	Q1KMD3	Heterogeneous nuclear ribonucleoprotein U-like protein 2 OS=Homo sapiens GN=HNRNPUL2 PE=1 SV=1	0	25.849	12	7	7	7	1	747	85.1	4.91	13.44	7
FALSE	High	Master Protein	O00267	Transcription elongation factor SPT5 OS=Homo sapiens GN=SUPT5H PE=1 SV=1	0	30.3	13	7	7	7	1	1087	120.9	5.06	7.55	7
FALSE	High	Master Protein	P62191	26S protease regulatory subunit 4 OS=Homo sapiens GN=PSMC1 PE=1 SV=1	0	29.654	24	8	8	7	1	440	49.2	6.21	11.87	8
FALSE	High	Master Protein	P67775	Serine/threonine-protein phosphatase 2A catalytic subunit alpha isoform OS=Homo sapiens GN=PPP2CA PE=1 SV=1	0	39.119	37	7	10	7	1	309	35.6	5.54	21.46	7
FALSE	High	Master Protein	P62263	40S ribosomal protein S14 OS=Homo sapiens GN=RPS14 PE=1 SV=3	0	37.035	33	7	15	7	1	151	16.3	10.05	28.44	7
FALSE	High	Master Protein	P41250	Glycine--tRNA ligase OS=Homo sapiens GN=GARS PE=1 SV=3	0	32.579	15	7	12	7	1	739	83.1	7.03	15.4	7
FALSE	High	Master Protein	P23921	Ribonucleoside-diphosphate reductase large subunit OS=Homo sapiens GN=RRM1 PE=1 SV=1	0	23.475	15	7	8	7	1	792	90	7.15	7.8	7
FALSE	High	Master Protein	Q9GZR7	ATP-dependent RNA helicase DDX24 OS=Homo sapiens GN=DDX24 PE=1 SV=1	0	20.459	12	7	7	7	1	859	96.3	9.06	2.19	7
FALSE	High	Master Protein	P39019	40S ribosomal protein S19 OS=Homo sapiens GN=RPS19 PE=1 SV=2	0	19.829	29	7	10	7	1	145	16.1	10.32	19.15	7
FALSE	High	Master Protein	Q14974	Importin subunit beta-1 OS=Homo sapiens GN=KPNB1 PE=1 SV=2	0	29.432	13	7	11	7	1	876	97.1	4.78	17.48	7
FALSE	High	Master Protein	O60664	Perilipin-3 OS=Homo sapiens GN=PLIN3 PE=1 SV=3	0	28.098	25	7	7	7	1	434	47	5.44	7.99	7
FALSE	High	Master Protein	P56192	Methionine--tRNA ligase, cytoplasmic OS=Homo sapiens GN=MARS PE=1 SV=2	0	23.248	13	7	7	7	1	900	101.1	6.16	1.62	7
FALSE	High	Master Protein	Q13573	SNW domain-containing protein 1 OS=Homo sapiens GN=SNW1 PE=1 SV=1	0	23.165	16	7	7	7	1	536	61.5	9.52	5.36	7
FALSE	High	Master Protein	P35637	RNA-binding protein FUS OS=Homo sapiens GN=FUS PE=1 SV=1	0	67.843	23	9	24	7	1	526	53.4	9.36	29.87	9
FALSE	High	Master Protein	O76003	Glutaredoxin-3 OS=Homo sapiens GN=GLRX3 PE=1 SV=2	0	21.411	26	7	7	7	1	335	37.4	5.39	5.89	7
FALSE	High	Master Protein	Q14141	Septin-6 OS=Homo sapiens GN=SEPT6 PE=1 SV=4	0	67.957	42	12	17	7	1	434	49.7	6.67	33.36	12
FALSE	High	Master Protein	P09429	High mobility group protein B1 OS=Homo sapiens GN=HMGB1 PE=1 SV=3	0	59.025	28	8	27	7	1	215	24.9	5.74	41.67	8
FALSE	High	Master Protein	Q9HB71	Calcyclin-binding protein OS=Homo sapiens GN=CACYBP PE=1 SV=2	0	42.255	35	7	11	7	1	228	26.2	8.25	21.25	7
FALSE	High	Master Protein	P63241	Eukaryotic translation initiation factor 5A-1 OS=Homo sapiens GN=EIF5A PE=1 SV=2	0	53.047	51	7	18	7	1	154	16.8	5.24	37.51	7
FALSE	High	Master Protein	Q15008	26S proteasome non-ATPase regulatory subunit 6 OS=Homo sapiens GN=PSMD6 PE=1 SV=1	0	30.544	23	7	8	7	1	389	45.5	5.62	11.78	7
FALSE	High	Master Protein	Q13423	NAD(P) transhydrogenase, mitochondrial OS=Homo sapiens GN=NNT PE=1 SV=3	0	24.112	10	7	7	7	1	1086	113.8	8.09	11.52	7
FALSE	High	Master Protein	Q9BUQ8	Probable ATP-dependent RNA helicase DDX23 OS=Homo sapiens GN=DDX23 PE=1 SV=3	0	16.997	12	7	7	7	1	820	95.5	9.55	7.88	7
FALSE	High	Master Protein	Q15019	Septin-2 OS=Homo sapiens GN=SEPT2 PE=1 SV=1	0	30.929	32	7	9	7	1	361	41.5	6.6	14.68	7
FALSE	High	Master Protein	Q9H9B4	Sideroflexin-1 OS=Homo sapiens GN=SFXN1 PE=1 SV=4	0	27.409	34	7	9	7	1	322	35.6	9.07	6.43	7
FALSE	High	Master Protein	P42285	Superkiller viralicidic activity 2-like 2 OS=Homo sapiens GN=SKIV2L2 PE=1 SV=3	0	22.016	10	7	8	7	1	1042	117.7	6.52	8.17	7
FALSE	High	Master Protein	O14744	Protein arginine N-methyltransferase 5 OS=Homo sapiens GN=PRMT5 PE=1 SV=4	0	23.946	14	7	8	7	1	637	72.6	6.29	7.42	7
FALSE	High	Master Protein	O95782	AP-2 complex subunit alpha-1 OS=Homo sapiens GN=AP2A1 PE=1 SV=3	0	16.545	10	7	7	7	1	977	107.5	7.03	2.31	7
FALSE	High	Master Protein	P05388	60S acidic ribosomal protein P0 OS=Homo sapiens GN=RPLP0 PE=1 SV=1	0	41.955	30	7	14	7	1	317	34.3	5.97	33.37	7
FALSE	High	Master Protein	P29692	Elongation factor 1-delta OS=Homo sapiens GN=EEF1D PE=1 SV=5	0	39.798	35	6	10	6	1	281	31.1	5.01	24.45	6
FALSE	High	Master Protein	P27635	60S ribosomal protein L10 OS=Homo sapiens GN=RPL10 PE=1 SV=4	0	36.013	31	6	16	6	1	214	24.6	10.08	25.13	6
FALSE	High	Master Protein	Q15907	Ras-related protein Rab-11B OS=Homo sapiens GN=RAB11B PE=1 SV=4	0	23.22	34	6	9	6	1	218	24.5	5.94	11.77	6
FALSE	High	Master Protein	O15511	Actin-related protein 2/3 complex subunit 5 OS=Homo sapiens GN=ARPC5 PE=1 SV=3	0	29.038	56	6	6	6	1	151	16.3	5.67	11.8	6
FALSE	High	Master Protein	O94906	Pre-mRNA-processing factor 6 OS=Homo sapiens GN=PRPF6 PE=1 SV=1	0	18.069	8	6	6	6	1	941	106.9	8.25	4.05	6
FALSE	High	Master Protein	P06400	Retinoblastoma-associated protein OS=Homo sapiens GN=RB1 PE=1 SV=2	0	27.236	12	6	7	6	1	928	106.1	7.94	14.84	6
FALSE	High	Master Protein	P62917	60S ribosomal protein L8 OS=Homo sapiens GN=RPL8 PE=1 SV=2	0	30.847	30	6	10	6	1	257	28	11.03	9.64	6
FALSE	High	Master Protein	P25398	40S ribosomal protein S12 OS=Homo sapiens GN=RPS12 PE=1 SV=3	0	35.417	49	6	15	6	1	132	14.5	7.21	30.39	6
FALSE	High	Master Protein	P00387	NADH-cytochrome b5 reductase 3 OS=Homo sapiens GN=CYB5R3 PE=1 SV=3	0	27.365	31	6	8	6	1	301	34.2	7.59	10.24	6
FALSE	High	Master Protein	P07384	Calpain-1 catalytic subunit OS=Homo sapiens GN=CAPN1 PE=1 SV=1	0	20.535	12	6	6	6	1	714	81.8	5.67	7.75	6
FALSE	High	Master Protein	Q9Y266	Nuclear migration protein nudC OS=Homo sapiens GN=NUDC PE=1 SV=1	0	29.237	29	6	11	6	1	331	38.2	5.38	11.1	6
FALSE	High	Master Protein	O75131	Copine-3 OS=Homo sapiens GN=CPNE3 PE=1 SV=1	0	25.45	19	6	6	6	1	537	60.1	5.85	3.92	6
FALSE	High	Master Protein	P49756	RNA-binding protein 25 OS=Homo sapiens GN=RBM25 PE=1 SV=3	0	17.137	10	6	6	6	1	843	100.1	6.32	9.12	6
FALSE	High	Master Protein	P14324	Farnesyl pyrophosphate synthase OS=Homo sapiens GN=FDPS PE=1 SV=4	0	27.766	17	6	9	6	1	419	48.2	6.15	12.9	6
FALSE	High	Master Protein	Q15366	Poly(rC)-binding protein 2 OS=Homo sapiens GN=PCBP2 PE=1 SV=1	0	62.654	42	7	17	6	1	365	38.6	6.79	41.1	7
FALSE	High	Master Protein	P55145	Mesencephalic astrocyte-derived neurotrophic factor OS=Homo sapiens GN=MANF PE=1 SV=3	0	24.475	38	6	9	6	1	182	20.7	8.69	10.81	6
FALSE	High	Master Protein	Q9UKV3	Apoptotic chromatin condensation inducer in the nucleus OS=Homo sapiens GN=ACIN1 PE=1 SV=2	0	26.984	8	6	11	6	1	1341	151.8	6.43	8.51	6
FALSE	High	Master Protein	Q8WXF1	Paraspeckle component 1 OS=Homo sapiens GN=PSPC1 PE=1 SV=1	0	22.362	14	6	7	6	1	523	58.7	6.67	4.83	6
FALSE	High	Master Protein	P61019	Ras-related protein Rab-2A OS=Homo sapiens GN=RAB2A PE=1 SV=1	0	25.043	36	6	6	6	1	212	23.5	6.54	11.19	6
FALSE	High	Master Protein	P36871	Phosphoglucomutase-1 OS=Homo sapiens GN=PGM1 PE=1 SV=3	0	21.562	13	6	6	6	1	562	61.4	6.76	8.42	6
FALSE	High	Master Protein	P30876	DNA-directed RNA polymerase II subunit RPB2 OS=Homo sapiens GN=POLR2B PE=1 SV=1	0	15.577	8	6	6	6	1	1174	133.8	6.87	4.09	6
FALSE	High	Master Protein	O96008	Mitochondrial import receptor subunit TOM40 homolog OS=Homo sapiens GN=TOMM40 PE=1 SV=1	0	22.604	31	6	9	6	1	361	37.9	7.25	5.36	6
FALSE	High	Master Protein	Q5SSJ5	Heterochromatin protein 1-binding protein 3 OS=Homo sapiens GN=HP1BP3 PE=1 SV=1	0	17.957	13	6	8	6	1	553	61.2	9.67	9.41	6
FALSE	High	Master Protein	P55327	Tumor protein D52 OS=Homo sapiens GN=TPD52 PE=1 SV=2	0	30.218	53	6	7	6	1	224	24.3	4.83	12.72	6
FALSE	High	Master Protein	Q8N1G4	Leucine-rich repeat-containing protein 47 OS=Homo sapiens GN=LRRC47 PE=1 SV=1	0	19.041	18	6	6	6	1	583	63.4	8.28	5.02	6
FALSE	High	Master Protein	Q9BXJ9	N-alpha-acetyltransferase 15, NatA auxiliary subunit OS=Homo sapiens GN=NAA15 PE=1 SV=1	0	18.544	9	6	7	6	1	866	101.2	7.42	3.8	6
FALSE	High	Master Protein	Q9UNM6	26S proteasome non-ATPase regulatory subunit 13 OS=Homo sapiens GN=PSMD13 PE=1 SV=2	0	16.601	18	6	6	6	1	376	42.9	5.81	4.37	6
FALSE	High	Master Protein	P23381	Tryptophan--tRNA ligase, cytoplasmic OS=Homo sapiens GN=WARS PE=1 SV=2	0	22.089	27	6	6	6	1	471	53.1	6.23	2.02	6
FALSE	High	Master Protein	Q9Y277	Voltage-dependent anion-selective channel protein 3 OS=Homo sapiens GN=VDAC3 PE=1 SV=1	0	31.236	29	7	10	6	1	283	30.6	8.66	23.07	7
FALSE	High	Master Protein	O60841	Eukaryotic translation initiation factor 5B OS=Homo sapiens GN=EIF5B PE=1 SV=4	0	24.879	8	6	7	6	1	1220	138.7	5.49	11.22	6
FALSE	High	Master Protein	Q15637	Splicing factor 1 OS=Homo sapiens GN=SF1 PE=1 SV=4	0	20.734	15	6	7	6	1	639	68.3	8.98	5.85	6
FALSE	High	Master Protein	Q9Y2Z0	Protein SGT1 homolog OS=Homo sapiens GN=SUGT1 PE=1 SV=3	0	17.686	24	6	7	6	1	365	41	5.16	4.97	6
FALSE	High	Master Protein	P62888	60S ribosomal protein L30 OS=Homo sapiens GN=RPL30 PE=1 SV=2	0	37.681	51	6	13	6	1	115	12.8	9.63	26.88	6
FALSE	High	Master Protein	Q9NQR4	Omega-amidase NIT2 OS=Homo sapiens GN=NIT2 PE=1 SV=1	0	26.158	37	6	6	6	1	276	30.6	7.21	9.11	6
FALSE	High	Master Protein	O75792	Ribonuclease H2 subunit A OS=Homo sapiens GN=RNASEH2A PE=1 SV=2	0	21.674	25	6	7	6	1	299	33.4	5.25	6.58	6
FALSE	High	Master Protein	P16949	Stathmin OS=Homo sapiens GN=STMN1 PE=1 SV=3	0	33.198	26	6	20	6	1	149	17.3	5.97	35.82	6
FALSE	High	Master Protein	Q13151	Heterogeneous nuclear ribonucleoprotein A0 OS=Homo sapiens GN=HNRNPA0 PE=1 SV=1	0	30.796	37	7	12	6	1	305	30.8	9.29	24.94	7
FALSE	High	Master Protein	Q6L8Q7	2',5'-phosphodiesterase 12 OS=Homo sapiens GN=PDE12 PE=1 SV=2	0	20.837	13	6	6	6	1	609	67.3	6.57	6.26	6
FALSE	High	Master Protein	P35613	Basigin OS=Homo sapiens GN=BSG PE=1 SV=2	0	28.596	23	6	10	6	1	385	42.2	5.66	10.64	6
FALSE	High	Master Protein	P28074	Proteasome subunit beta type-5 OS=Homo sapiens GN=PSMB5 PE=1 SV=3	0	26.891	31	6	6	6	1	263	28.5	6.92	11.34	6
FALSE	High	Master Protein	P52597	Heterogeneous nuclear ribonucleoprotein F OS=Homo sapiens GN=HNRNPF PE=1 SV=3	0	52.87	30	8	20	6	1	415	45.6	5.58	37.05	8
FALSE	High	Master Protein	P43034	Platelet-activating factor acetylhydrolase IB subunit alpha OS=Homo sapiens GN=PAFAH1B1 PE=1 SV=2	0	25.98	23	6	7	6	1	410	46.6	7.37	5.07	6
FALSE	High	Master Protein	P07355	Annexin A2 OS=Homo sapiens GN=ANXA2 PE=1 SV=2	0	28.017	27	6	8	6	1	339	38.6	7.75	11.06	6
FALSE	High	Master Protein	P22695	Cytochrome b-c1 complex subunit 2, mitochondrial OS=Homo sapiens GN=UQCRC2 PE=1 SV=3	0	20.55	26	6	6	6	1	453	48.4	8.63	4.63	6
FALSE	High	Master Protein	P51784	Ubiquitin carboxyl-terminal hydrolase 11 OS=Homo sapiens GN=USP11 PE=1 SV=3	0	16.334	10	6	6	6	1	963	109.7	5.45	6.19	6
FALSE	High	Master Protein	Q9UJU6	Drebrin-like protein OS=Homo sapiens GN=DBNL PE=1 SV=1	0	25.227	17	6	6	6	1	430	48.2	5.05	10.25	6
FALSE	High	Master Protein	Q14165	Malectin OS=Homo sapiens GN=MLEC PE=1 SV=1	0	26.149	29	6	6	6	1	292	32.2	5.41	12.19	6
FALSE	High	Master Protein	P15170	Eukaryotic peptide chain release factor GTP-binding subunit ERF3A OS=Homo sapiens GN=GSPT1 PE=1 SV=1	0	18.731	19	6	6	6	1	499	55.7	5.62	5.14	6
FALSE	High	Master Protein	P00367	Glutamate dehydrogenase 1, mitochondrial OS=Homo sapiens GN=GLUD1 PE=1 SV=2	0	30.437	17	6	8	6	1	558	61.4	7.8	15.41	6
FALSE	High	Master Protein	P62333	26S protease regulatory subunit 10B OS=Homo sapiens GN=PSMC6 PE=1 SV=1	0	22.328	22	6	6	6	1	389	44.1	7.49	7.03	6
FALSE	High	Master Protein	P29590	Protein PML OS=Homo sapiens GN=PML PE=1 SV=3	0	19.057	9	6	6	6	1	882	97.5	6.21	6.57	6
FALSE	High	Master Protein	A0FGR8	Extended synaptotagmin-2 OS=Homo sapiens GN=ESYT2 PE=1 SV=1	0	16.363	11	6	6	6	1	921	102.3	9.26	4.81	6
FALSE	High	Master Protein	Q92973	Transportin-1 OS=Homo sapiens GN=TNPO1 PE=1 SV=2	0	22.762	9	6	6	6	1	898	102.3	4.98	8.41	6
FALSE	High	Master Protein	P38159	RNA-binding motif protein, X chromosome OS=Homo sapiens GN=RBMX PE=1 SV=3	0	27.288	15	6	11	6	1	391	42.3	10.05	22.41	6
FALSE	High	Master Protein	P31930	Cytochrome b-c1 complex subunit 1, mitochondrial OS=Homo sapiens GN=UQCRC1 PE=1 SV=3	0	35.415	26	6	6	6	1	480	52.6	6.37	13.12	6
FALSE	High	Master Protein	Q92556	Engulfment and cell motility protein 1 OS=Homo sapiens GN=ELMO1 PE=1 SV=2	0	16.243	10	6	8	6	1	727	83.8	6.28	1.91	6
FALSE	High	Master Protein	Q9UNZ2	NSFL1 cofactor p47 OS=Homo sapiens GN=NSFL1C PE=1 SV=2	0	25.539	26	6	6	6	1	370	40.5	5.1	10.93	6
FALSE	High	Master Protein	P06753	Tropomyosin alpha-3 chain OS=Homo sapiens GN=TPM3 PE=1 SV=2	0	29.17	21	10	12	6	1	285	32.9	4.72	17.5	10
FALSE	High	Master Protein	Q14498	RNA-binding protein 39 OS=Homo sapiens GN=RBM39 PE=1 SV=2	0	26.659	17	6	9	6	1	530	59.3	10.1	9.9	6
FALSE	High	Master Protein	P54819	Adenylate kinase 2, mitochondrial OS=Homo sapiens GN=AK2 PE=1 SV=2	0	20.562	38	6	7	6	1	239	26.5	7.81	6.61	6
FALSE	High	Master Protein	P31150	Rab GDP dissociation inhibitor alpha OS=Homo sapiens GN=GDI1 PE=1 SV=2	0	53.505	34	8	12	6	1	447	50.6	5.14	24.91	8
FALSE	High	Master Protein	Q9BXP5	Serrate RNA effector molecule homolog OS=Homo sapiens GN=SRRT PE=1 SV=1	0	21.027	9	6	7	6	1	876	100.6	5.96	6.77	6
FALSE	High	Master Protein	P04844	Dolichyl-diphosphooligosaccharide--protein glycosyltransferase subunit 2 OS=Homo sapiens GN=RPN2 PE=1 SV=3	0	40.846	15	6	7	6	1	631	69.2	5.69	13.35	6
FALSE	High	Master Protein	Q14157	Ubiquitin-associated protein 2-like OS=Homo sapiens GN=UBAP2L PE=1 SV=2	0	26.545	10	6	6	6	1	1087	114.5	7.11	12.03	6
FALSE	High	Master Protein	P09661	U2 small nuclear ribonucleoprotein A' OS=Homo sapiens GN=SNRPA1 PE=1 SV=2	0	30.7	28	6	9	6	1	255	28.4	8.62	11.73	6
FALSE	High	Master Protein	Q14137	Ribosome biogenesis protein BOP1 OS=Homo sapiens GN=BOP1 PE=1 SV=2	0	15.554	13	6	6	6	1	746	83.6	6.19	4.88	6
FALSE	High	Master Protein	P55786	Puromycin-sensitive aminopeptidase OS=Homo sapiens GN=NPEPPS PE=1 SV=2	0	17.224	7	6	7	6	1	919	103.2	5.72	5.97	6
FALSE	High	Master Protein	P50570	Dynamin-2 OS=Homo sapiens GN=DNM2 PE=1 SV=2	0	17.919	10	6	6	6	1	870	98	7.44	6.34	6
FALSE	High	Master Protein	P55010	Eukaryotic translation initiation factor 5 OS=Homo sapiens GN=EIF5 PE=1 SV=2	0	21.93	18	6	6	6	1	431	49.2	5.58	13.08	6
FALSE	High	Master Protein	P05387	60S acidic ribosomal protein P2 OS=Homo sapiens GN=RPLP2 PE=1 SV=1	0	38.632	73	6	11	6	1	115	11.7	4.54	20.12	6
FALSE	High	Master Protein	Q9Y6N5	Sulfide:quinone oxidoreductase, mitochondrial OS=Homo sapiens GN=SQRDL PE=1 SV=1	0	18.949	17	6	6	6	1	450	49.9	9.11	7.18	6
FALSE	High	Master Protein	P49792	E3 SUMO-protein ligase RanBP2 OS=Homo sapiens GN=RANBP2 PE=1 SV=2	0	16.022	3	6	6	6	1	3224	358	6.2	2.03	6
FALSE	High	Master Protein	O15355	Protein phosphatase 1G OS=Homo sapiens GN=PPM1G PE=1 SV=1	0	25.22	20	6	8	6	1	546	59.2	4.36	7.78	6
FALSE	High	Master Protein	P30048	Thioredoxin-dependent peroxide reductase, mitochondrial OS=Homo sapiens GN=PRDX3 PE=1 SV=3	0	36.727	29	6	11	6	1	256	27.7	7.78	19.84	6
FALSE	High	Master Protein	Q13185	Chromobox protein homolog 3 OS=Homo sapiens GN=CBX3 PE=1 SV=4	0	42.699	54	8	15	6	1	183	20.8	5.33	26.34	8
FALSE	High	Master Protein	P08758	Annexin A5 OS=Homo sapiens GN=ANXA5 PE=1 SV=2	0	17.111	22	6	6	6	1	320	35.9	5.05	7.34	6
FALSE	High	Master Protein	O95819	Mitogen-activated protein kinase kinase kinase kinase 4 OS=Homo sapiens GN=MAP4K4 PE=1 SV=2	0	16.717	6	6	6	6	1	1239	142	7.46	6.91	6
FALSE	High	Master Protein	P45974	Ubiquitin carboxyl-terminal hydrolase 5 OS=Homo sapiens GN=USP5 PE=1 SV=2	0	23.462	12	6	6	6	1	858	95.7	5.03	5.56	6
FALSE	High	Master Protein	O95336	6-phosphogluconolactonase OS=Homo sapiens GN=PGLS PE=1 SV=2	0	19.178	32	6	9	6	1	258	27.5	6.05	7.42	6
FALSE	High	Master Protein	Q02543	60S ribosomal protein L18a OS=Homo sapiens GN=RPL18A PE=1 SV=2	0	25.761	31	6	12	6	1	176	20.7	10.71	19.75	6
FALSE	High	Master Protein	P61353	60S ribosomal protein L27 OS=Homo sapiens GN=RPL27 PE=1 SV=2	0	29.749	43	6	14	6	1	136	15.8	10.56	16.85	6
FALSE	High	Master Protein	Q02878	60S ribosomal protein L6 OS=Homo sapiens GN=RPL6 PE=1 SV=3	0	32.187	27	6	13	6	1	288	32.7	10.58	7.7	6
FALSE	High	Master Protein	P22392	Nucleoside diphosphate kinase B OS=Homo sapiens GN=NME2 PE=1 SV=1	0	37.878	38	6	17	6	1	152	17.3	8.41	23.1	6
FALSE	High	Master Protein	O43681	ATPase ASNA1 OS=Homo sapiens GN=ASNA1 PE=1 SV=2	0	22.326	23	6	7	6	1	348	38.8	4.91	9.06	6
FALSE	High	Master Protein	O60832	H/ACA ribonucleoprotein complex subunit 4 OS=Homo sapiens GN=DKC1 PE=1 SV=3	0	15.961	18	6	7	6	1	514	57.6	9.42	1.99	6
FALSE	High	Master Protein	Q09161	Nuclear cap-binding protein subunit 1 OS=Homo sapiens GN=NCBP1 PE=1 SV=1	0	21.243	11	6	6	6	1	790	91.8	6.43	5.95	6
FALSE	High	Master Protein	P26368	Splicing factor U2AF 65 kDa subunit OS=Homo sapiens GN=U2AF2 PE=1 SV=4	0	34.538	25	6	10	6	1	475	53.5	9.09	20.2	6
FALSE	High	Master Protein	Q9BZZ5	Apoptosis inhibitor 5 OS=Homo sapiens GN=API5 PE=1 SV=3	0	24.325	17	6	6	6	1	524	59	7.34	10.39	6
FALSE	High	Master Protein	P52907	F-actin-capping protein subunit alpha-1 OS=Homo sapiens GN=CAPZA1 PE=1 SV=3	0	39.49	42	7	14	6	1	286	32.9	5.69	31.87	7
FALSE	High	Master Protein	P05141	ADP/ATP translocase 2 OS=Homo sapiens GN=SLC25A5 PE=1 SV=7	0	37.917	30	9	17	6	1	298	32.8	9.69	21.37	9
FALSE	High	Master Protein	P20290	Transcription factor BTF3 OS=Homo sapiens GN=BTF3 PE=1 SV=1	0	35.803	50	6	12	6	1	206	22.2	9.38	18.4	6
FALSE	High	Master Protein	Q14444	Caprin-1 OS=Homo sapiens GN=CAPRIN1 PE=1 SV=2	0	30.257	16	6	8	6	1	709	78.3	5.25	10.52	6
FALSE	High	Master Protein	Q9Y678	Coatomer subunit gamma-1 OS=Homo sapiens GN=COPG1 PE=1 SV=1	0	27.982	12	7	8	6	1	874	97.7	5.47	7.87	7
FALSE	High	Master Protein	P09104	Gamma-enolase OS=Homo sapiens GN=ENO2 PE=1 SV=3	0	71.215	36	9	37	6	1	434	47.2	5.03	79.42	9
FALSE	High	Master Protein	Q9NYL9	Tropomodulin-3 OS=Homo sapiens GN=TMOD3 PE=1 SV=1	0	24.325	28	6	7	6	1	352	39.6	5.19	10.13	6
FALSE	High	Master Protein	Q14019	Coactosin-like protein OS=Homo sapiens GN=COTL1 PE=1 SV=3	0	33.199	50	6	12	6	1	142	15.9	5.67	22.08	6
FALSE	High	Master Protein	P62277	40S ribosomal protein S13 OS=Homo sapiens GN=RPS13 PE=1 SV=2	0	27.352	28	6	13	6	1	151	17.2	10.54	22.66	6
FALSE	High	Master Protein	O43684	Mitotic checkpoint protein BUB3 OS=Homo sapiens GN=BUB3 PE=1 SV=1	0	30.377	25	6	10	6	1	328	37.1	6.84	9.22	6
FALSE	High	Master Protein	P62280	40S ribosomal protein S11 OS=Homo sapiens GN=RPS11 PE=1 SV=3	0	31.954	34	6	13	6	1	158	18.4	10.3	15.05	6
FALSE	High	Master Protein	P22307	Non-specific lipid-transfer protein OS=Homo sapiens GN=SCP2 PE=1 SV=2	0	16.592	12	6	6	6	1	547	59	6.89	9.96	6
FALSE	High	Master Protein	P25788	Proteasome subunit alpha type-3 OS=Homo sapiens GN=PSMA3 PE=1 SV=2	0	28.086	23	6	10	6	1	255	28.4	5.33	10.75	6
FALSE	High	Master Protein	P62316	Small nuclear ribonucleoprotein Sm D2 OS=Homo sapiens GN=SNRPD2 PE=1 SV=1	0	27.62	47	6	14	6	1	118	13.5	9.91	32.83	6
FALSE	High	Master Protein	Q07020	60S ribosomal protein L18 OS=Homo sapiens GN=RPL18 PE=1 SV=2	0	29.667	31	6	15	6	1	188	21.6	11.72	24.79	6
FALSE	High	Master Protein	P16615	Sarcoplasmic/endoplasmic reticulum calcium ATPase 2 OS=Homo sapiens GN=ATP2A2 PE=1 SV=1	0	37.624	13	11	11	6	1	1042	114.7	5.34	12.35	11
FALSE	High	Master Protein	Q96I99	Succinate--CoA ligase [GDP-forming] subunit beta, mitochondrial OS=Homo sapiens GN=SUCLG2 PE=1 SV=2	0	15.534	16	6	6	6	1	432	46.5	6.39	2.46	6
FALSE	High	Master Protein	P05107	Integrin beta-2 OS=Homo sapiens GN=ITGB2 PE=1 SV=2	0	20.072	11	6	6	6	1	769	84.7	6.95	6.67	6
FALSE	High	Master Protein	P62873	Guanine nucleotide-binding protein G(I)/G(S)/G(T) subunit beta-1 OS=Homo sapiens GN=GNB1 PE=1 SV=3	0	55.918	45	8	13	6	1	340	37.4	6	21.2	8
FALSE	High	Master Protein	P52565	Rho GDP-dissociation inhibitor 1 OS=Homo sapiens GN=ARHGDIA PE=1 SV=3	0	47.428	43	6	16	6	1	204	23.2	5.11	31.65	6
FALSE	High	Master Protein	P28066	Proteasome subunit alpha type-5 OS=Homo sapiens GN=PSMA5 PE=1 SV=3	0	30.101	38	6	11	6	1	241	26.4	4.79	23.85	6
FALSE	High	Master Protein	Q96I24	Far upstream element-binding protein 3 OS=Homo sapiens GN=FUBP3 PE=1 SV=2	0	27.683	20	8	11	6	1	572	61.6	8.38	8.11	8
FALSE	High	Master Protein	P12270	Nucleoprotein TPR OS=Homo sapiens GN=TPR PE=1 SV=3	0	24.278	5	6	6	6	1	2363	267.1	5.02	10.32	6
FALSE	High	Master Protein	P04040	Catalase OS=Homo sapiens GN=CAT PE=1 SV=3	0	29.916	15	6	6	6	1	527	59.7	7.39	9.97	6
FALSE	High	Master Protein	P60953	Cell division control protein 42 homolog OS=Homo sapiens GN=CDC42 PE=1 SV=2	0	33.798	46	6	10	6	1	191	21.2	6.55	13.63	6
FALSE	High	Master Protein	P14923	Junction plakoglobin OS=Homo sapiens GN=JUP PE=1 SV=3	0	19.271	10	6	6	6	1	745	81.7	6.14	8.97	6
FALSE	High	Master Protein	Q13303	Voltage-gated potassium channel subunit beta-2 OS=Homo sapiens GN=KCNAB2 PE=1 SV=2	0	18.726	28	6	6	6	1	367	41	9	6.62	6
FALSE	High	Master Protein	P04818	Thymidylate synthase OS=Homo sapiens GN=TYMS PE=1 SV=3	0	32.442	33	6	11	6	1	313	35.7	7.01	11.48	6
FALSE	High	Master Protein	Q9BWF3	RNA-binding protein 4 OS=Homo sapiens GN=RBM4 PE=1 SV=1	0	24.022	23	6	7	6	1	364	40.3	7.08	4.76	6
FALSE	High	Master Protein	Q13148	TAR DNA-binding protein 43 OS=Homo sapiens GN=TARDBP PE=1 SV=1	0	33.008	30	6	12	6	1	414	44.7	6.19	18.74	6
FALSE	High	Master Protein	Q00534	Cyclin-dependent kinase 6 OS=Homo sapiens GN=CDK6 PE=1 SV=1	0	33.403	30	7	12	6	1	326	36.9	6.46	15.02	7
FALSE	High	Master Protein	Q9NZL9	Methionine adenosyltransferase 2 subunit beta OS=Homo sapiens GN=MAT2B PE=1 SV=1	0	26.013	26	6	6	6	1	334	37.5	7.36	12.47	6
FALSE	High	Master Protein	P04899	Guanine nucleotide-binding protein G(i) subunit alpha-2 OS=Homo sapiens GN=GNAI2 PE=1 SV=3	0	48.737	37	10	13	6	1	355	40.4	5.54	29.38	10
FALSE	High	Master Protein	O76094	Signal recognition particle subunit SRP72 OS=Homo sapiens GN=SRP72 PE=1 SV=3	0	18.041	10	5	5	5	1	671	74.6	9.26	5.22	5
FALSE	High	Master Protein	P25789	Proteasome subunit alpha type-4 OS=Homo sapiens GN=PSMA4 PE=1 SV=1	0	24.933	26	5	7	5	1	261	29.5	7.72	10.38	5
FALSE	High	Master Protein	Q04917	14-3-3 protein eta OS=Homo sapiens GN=YWHAH PE=1 SV=4	0	31	28	7	13	5	1	246	28.2	4.84	18.7	7
FALSE	High	Master Protein	Q14558	Phosphoribosyl pyrophosphate synthase-associated protein 1 OS=Homo sapiens GN=PRPSAP1 PE=1 SV=2	0	23.038	25	6	6	5	1	356	39.4	7.2	2.27	6
FALSE	High	Master Protein	Q8NC51	Plasminogen activator inhibitor 1 RNA-binding protein OS=Homo sapiens GN=SERBP1 PE=1 SV=2	0	12.006	16	5	8	5	1	408	44.9	8.65	2.37	5
FALSE	High	Master Protein	O95202	LETM1 and EF-hand domain-containing protein 1, mitochondrial OS=Homo sapiens GN=LETM1 PE=1 SV=1	0	21.031	9	5	5	5	1	739	83.3	6.7	9.62	5
FALSE	High	Master Protein	P25685	DnaJ homolog subfamily B member 1 OS=Homo sapiens GN=DNAJB1 PE=1 SV=4	0	16.384	18	5	5	5	1	340	38	8.63	8.17	5
FALSE	High	Master Protein	Q14166	Tubulin--tyrosine ligase-like protein 12 OS=Homo sapiens GN=TTLL12 PE=1 SV=2	0	19.814	13	5	5	5	1	644	74.4	5.53	4.46	5
FALSE	High	Master Protein	O00487	26S proteasome non-ATPase regulatory subunit 14 OS=Homo sapiens GN=PSMD14 PE=1 SV=1	0	18.499	31	5	6	5	1	310	34.6	6.52	4.84	5
FALSE	High	Master Protein	Q16539	Mitogen-activated protein kinase 14 OS=Homo sapiens GN=MAPK14 PE=1 SV=3	0	15.4	21	5	5	5	1	360	41.3	5.78	3.93	5
FALSE	High	Master Protein	Q9HC38	Glyoxalase domain-containing protein 4 OS=Homo sapiens GN=GLOD4 PE=1 SV=1	0	15.262	22	5	5	5	1	313	34.8	5.6	2.71	5
FALSE	High	Master Protein	P31942	Heterogeneous nuclear ribonucleoprotein H3 OS=Homo sapiens GN=HNRNPH3 PE=1 SV=2	0	29.123	22	6	10	5	1	346	36.9	6.87	15.11	6
FALSE	High	Master Protein	P62750	60S ribosomal protein L23a OS=Homo sapiens GN=RPL23A PE=1 SV=1	0	21.258	28	5	7	5	1	156	17.7	10.45	16.12	5
FALSE	High	Master Protein	P43686	26S protease regulatory subunit 6B OS=Homo sapiens GN=PSMC4 PE=1 SV=2	0	20.145	20	5	6	5	1	418	47.3	5.21	6.76	5
FALSE	High	Master Protein	P62995	Transformer-2 protein homolog beta OS=Homo sapiens GN=TRA2B PE=1 SV=1	0	30.597	22	5	10	5	1	288	33.6	11.25	21.61	5
FALSE	High	Master Protein	O60884	DnaJ homolog subfamily A member 2 OS=Homo sapiens GN=DNAJA2 PE=1 SV=1	0	13.482	19	5	5	5	1	412	45.7	6.48	0	5
FALSE	High	Master Protein	O75368	SH3 domain-binding glutamic acid-rich-like protein OS=Homo sapiens GN=SH3BGRL PE=1 SV=1	0	25.187	73	5	7	5	1	114	12.8	5.25	8.91	5
FALSE	High	Master Protein	P24534	Elongation factor 1-beta OS=Homo sapiens GN=EEF1B2 PE=1 SV=3	0	33.416	39	5	11	5	1	225	24.7	4.67	21.61	5
FALSE	High	Master Protein	P52306	Rap1 GTPase-GDP dissociation stimulator 1 OS=Homo sapiens GN=RAP1GDS1 PE=1 SV=3	0	15.123	11	5	5	5	1	607	66.3	5.31	5.75	5
FALSE	High	Master Protein	P35268	60S ribosomal protein L22 OS=Homo sapiens GN=RPL22 PE=1 SV=2	0	30.489	52	5	10	5	1	128	14.8	9.19	20.83	5
FALSE	High	Master Protein	Q00688	Peptidyl-prolyl cis-trans isomerase FKBP3 OS=Homo sapiens GN=FKBP3 PE=1 SV=1	0	14.254	27	5	6	5	1	224	25.2	9.28	6.29	5
FALSE	High	Master Protein	P46782	40S ribosomal protein S5 OS=Homo sapiens GN=RPS5 PE=1 SV=4	0	36.1	28	5	10	5	1	204	22.9	9.72	33.6	5
FALSE	High	Master Protein	O14737	Programmed cell death protein 5 OS=Homo sapiens GN=PDCD5 PE=1 SV=3	0	21.037	38	5	9	5	1	125	14.3	6.04	8.25	5
FALSE	High	Master Protein	Q9GZS3	WD repeat-containing protein 61 OS=Homo sapiens GN=WDR61 PE=1 SV=1	0	19.158	31	5	7	5	1	305	33.6	5.47	4.31	5
FALSE	High	Master Protein	Q9GZL7	Ribosome biogenesis protein WDR12 OS=Homo sapiens GN=WDR12 PE=1 SV=2	0	16.093	18	5	5	5	1	423	47.7	5.9	6.6	5
FALSE	High	Master Protein	P62829	60S ribosomal protein L23 OS=Homo sapiens GN=RPL23 PE=1 SV=1	0	38.197	39	5	15	5	1	140	14.9	10.51	28.55	5
FALSE	High	Master Protein	P19623	Spermidine synthase OS=Homo sapiens GN=SRM PE=1 SV=1	0	15.487	15	5	5	5	1	302	33.8	5.49	8.83	5
FALSE	High	Master Protein	O43809	Cleavage and polyadenylation specificity factor subunit 5 OS=Homo sapiens GN=NUDT21 PE=1 SV=1	0	17.632	26	5	7	5	1	227	26.2	8.82	2.12	5
FALSE	High	Master Protein	Q9NQG5	Regulation of nuclear pre-mRNA domain-containing protein 1B OS=Homo sapiens GN=RPRD1B PE=1 SV=1	0	16.098	25	5	5	5	1	326	36.9	5.97	5.84	5
FALSE	High	Master Protein	P62993	Growth factor receptor-bound protein 2 OS=Homo sapiens GN=GRB2 PE=1 SV=1	0	19.546	34	5	5	5	1	217	25.2	6.32	8.38	5
FALSE	High	Master Protein	P48739	Phosphatidylinositol transfer protein beta isoform OS=Homo sapiens GN=PITPNB PE=1 SV=2	0	21.94	34	6	6	5	1	271	31.5	6.87	11.65	6
FALSE	High	Master Protein	P14317	Hematopoietic lineage cell-specific protein OS=Homo sapiens GN=HCLS1 PE=1 SV=3	0	28.156	17	5	7	5	1	486	54	4.81	12.3	5
FALSE	High	Master Protein	O00410	Importin-5 OS=Homo sapiens GN=IPO5 PE=1 SV=4	0	21.472	7	5	6	5	1	1097	123.6	4.94	12.53	5
FALSE	High	Master Protein	Q9Y5M8	Signal recognition particle receptor subunit beta OS=Homo sapiens GN=SRPRB PE=1 SV=3	0	21.485	28	5	5	5	1	271	29.7	9.04	4.73	5
FALSE	High	Master Protein	Q04695	Keratin, type I cytoskeletal 17 OS=Homo sapiens GN=KRT17 PE=1 SV=2	0	49.668	30	12	22	5	1	432	48.1	5.02	22.39	12
FALSE	High	Master Protein	P68400	Casein kinase II subunit alpha OS=Homo sapiens GN=CSNK2A1 PE=1 SV=1	0	18.082	22	5	5	5	1	391	45.1	7.74	5.36	5
FALSE	High	Master Protein	P30084	Enoyl-CoA hydratase, mitochondrial OS=Homo sapiens GN=ECHS1 PE=1 SV=4	0	21.822	28	5	6	5	1	290	31.4	8.07	6.71	5
FALSE	High	Master Protein	P24928	DNA-directed RNA polymerase II subunit RPB1 OS=Homo sapiens GN=POLR2A PE=1 SV=2	0	15.722	4	5	5	5	1	1970	217	7.37	2.29	5
FALSE	High	Master Protein	O43396	Thioredoxin-like protein 1 OS=Homo sapiens GN=TXNL1 PE=1 SV=3	0	17.489	32	5	6	5	1	289	32.2	4.96	3.43	5
FALSE	High	Master Protein	Q9BXS5	AP-1 complex subunit mu-1 OS=Homo sapiens GN=AP1M1 PE=1 SV=3	0	14.817	13	5	5	5	1	423	48.6	7.3	3.42	5
FALSE	High	Master Protein	O43252	Bifunctional 3'-phosphoadenosine 5'-phosphosulfate synthase 1 OS=Homo sapiens GN=PAPSS1 PE=1 SV=2	0	16.794	12	5	5	5	1	624	70.8	6.86	8.76	5
FALSE	High	Master Protein	Q9Y262	Eukaryotic translation initiation factor 3 subunit L OS=Homo sapiens GN=EIF3L PE=1 SV=1	0	26.183	11	5	6	5	1	564	66.7	6.34	12.4	5
FALSE	High	Master Protein	Q9Y570	Protein phosphatase methylesterase 1 OS=Homo sapiens GN=PPME1 PE=1 SV=3	0	14.697	19	5	5	5	1	386	42.3	5.97	4.41	5
FALSE	High	Master Protein	P62195	26S protease regulatory subunit 8 OS=Homo sapiens GN=PSMC5 PE=1 SV=1	0	23.417	24	6	6	5	1	406	45.6	7.55	12.7	6
FALSE	High	Master Protein	P11216	Glycogen phosphorylase, brain form OS=Homo sapiens GN=PYGB PE=1 SV=5	0	15.832	7	5	5	5	1	843	96.6	6.86	1.64	5
FALSE	High	Master Protein	P09110	3-ketoacyl-CoA thiolase, peroxisomal OS=Homo sapiens GN=ACAA1 PE=1 SV=2	0	12.461	25	5	6	5	1	424	44.3	8.44	3.47	5
FALSE	High	Master Protein	O95831	Apoptosis-inducing factor 1, mitochondrial OS=Homo sapiens GN=AIFM1 PE=1 SV=1	0	26.145	12	5	5	5	1	613	66.9	8.95	12.75	5
FALSE	High	Master Protein	P18621	60S ribosomal protein L17 OS=Homo sapiens GN=RPL17 PE=1 SV=3	0	16.062	37	5	7	5	1	184	21.4	10.17	6.96	5
FALSE	High	Master Protein	P47755	F-actin-capping protein subunit alpha-2 OS=Homo sapiens GN=CAPZA2 PE=1 SV=3	0	28.551	36	6	7	5	1	286	32.9	5.85	15.37	6
FALSE	High	Master Protein	Q9BZX2	Uridine-cytidine kinase 2 OS=Homo sapiens GN=UCK2 PE=1 SV=1	0	18.758	25	5	5	5	1	261	29.3	6.7	8.15	5
FALSE	High	Master Protein	P35659	Protein DEK OS=Homo sapiens GN=DEK PE=1 SV=1	0	28.364	13	5	8	5	1	375	42.6	8.56	13.69	5
FALSE	High	Master Protein	Q6UN15	Pre-mRNA 3'-end-processing factor FIP1 OS=Homo sapiens GN=FIP1L1 PE=1 SV=1	0	20.724	17	5	5	5	1	594	66.5	5.59	5.02	5
FALSE	High	Master Protein	P43487	Ran-specific GTPase-activating protein OS=Homo sapiens GN=RANBP1 PE=1 SV=1	0	38.934	39	5	10	5	1	201	23.3	5.29	16.38	5
FALSE	High	Master Protein	Q08J23	tRNA (cytosine(34)-C(5))-methyltransferase OS=Homo sapiens GN=NSUN2 PE=1 SV=2	0	24.389	11	5	7	5	1	767	86.4	6.77	5.18	5
FALSE	High	Master Protein	Q8WU39	Marginal zone B- and B1-cell-specific protein OS=Homo sapiens GN=MZB1 PE=1 SV=1	0	25.262	48	5	5	5	1	189	20.7	5.57	10.23	5
FALSE	High	Master Protein	Q969X5	Endoplasmic reticulum-Golgi intermediate compartment protein 1 OS=Homo sapiens GN=ERGIC1 PE=1 SV=1	0	17.092	20	5	6	5	1	290	32.6	7.06	5.28	5
FALSE	High	Master Protein	Q29RF7	Sister chromatid cohesion protein PDS5 homolog A OS=Homo sapiens GN=PDS5A PE=1 SV=1	0	15.467	6	5	5	5	1	1337	150.7	7.91	4.97	5
FALSE	High	Master Protein	Q86V81	THO complex subunit 4 OS=Homo sapiens GN=ALYREF PE=1 SV=3	0	42.236	31	5	13	5	1	257	26.9	11.15	20.95	5
FALSE	High	Master Protein	P13073	Cytochrome c oxidase subunit 4 isoform 1, mitochondrial OS=Homo sapiens GN=COX4I1 PE=1 SV=1	0	15.98	27	5	6	5	1	169	19.6	9.51	9.61	5
FALSE	High	Master Protein	O00303	Eukaryotic translation initiation factor 3 subunit F OS=Homo sapiens GN=EIF3F PE=1 SV=1	0	22.841	19	5	8	5	1	357	37.5	5.45	6.85	5
FALSE	High	Master Protein	P62266	40S ribosomal protein S23 OS=Homo sapiens GN=RPS23 PE=1 SV=3	0	22.759	36	5	8	5	1	143	15.8	10.49	18.4	5
FALSE	High	Master Protein	P62879	Guanine nucleotide-binding protein G(I)/G(S)/G(T) subunit beta-2 OS=Homo sapiens GN=GNB2 PE=1 SV=3	0	37.034	36	7	9	5	1	340	37.3	6	17.41	7
FALSE	High	Master Protein	Q9BY77	Polymerase delta-interacting protein 3 OS=Homo sapiens GN=POLDIP3 PE=1 SV=2	0	16.945	21	5	5	5	1	421	46.1	9.99	8.96	5
FALSE	High	Master Protein	Q9P0L0	Vesicle-associated membrane protein-associated protein A OS=Homo sapiens GN=VAPA PE=1 SV=3	0	22.407	35	6	9	5	1	249	27.9	8.62	12.61	6
FALSE	High	Master Protein	P53041	Serine/threonine-protein phosphatase 5 OS=Homo sapiens GN=PPP5C PE=1 SV=1	0	20.66	15	5	5	5	1	499	56.8	6.28	7.85	5
FALSE	High	Master Protein	P07437	Tubulin beta chain OS=Homo sapiens GN=TUBB PE=1 SV=2	0	308.715	79	27	218	5	1	444	49.6	4.89	473.83	27
FALSE	High	Master Protein	Q16543	Hsp90 co-chaperone Cdc37 OS=Homo sapiens GN=CDC37 PE=1 SV=1	0	26.074	19	5	10	5	1	378	44.4	5.25	9.02	5
FALSE	High	Master Protein	O94925	Glutaminase kidney isoform, mitochondrial OS=Homo sapiens GN=GLS PE=1 SV=1	0	23.068	14	5	6	5	1	669	73.4	7.77	5.77	5
FALSE	High	Master Protein	Q9H4A4	Aminopeptidase B OS=Homo sapiens GN=RNPEP PE=1 SV=2	0	15.607	11	5	5	5	1	650	72.5	5.74	1.92	5
FALSE	High	Master Protein	Q04760	Lactoylglutathione lyase OS=Homo sapiens GN=GLO1 PE=1 SV=4	0	22.149	34	5	8	5	1	184	20.8	5.31	9.06	5
FALSE	High	Master Protein	Q96RU3	Formin-binding protein 1 OS=Homo sapiens GN=FNBP1 PE=1 SV=2	0	17.984	12	5	6	5	1	617	71.3	5.72	7.53	5
FALSE	High	Master Protein	P48444	Coatomer subunit delta OS=Homo sapiens GN=ARCN1 PE=1 SV=1	0	16.722	10	5	5	5	1	511	57.2	6.21	10.04	5
FALSE	High	Master Protein	Q07021	Complement component 1 Q subcomponent-binding protein, mitochondrial OS=Homo sapiens GN=C1QBP PE=1 SV=1	0	28.228	36	5	10	5	1	282	31.3	4.84	30.99	5
FALSE	High	Master Protein	P42224	Signal transducer and activator of transcription 1-alpha/beta OS=Homo sapiens GN=STAT1 PE=1 SV=2	0	16.8	9	5	5	5	1	750	87.3	6.05	2.49	5
FALSE	High	Master Protein	P49591	Serine--tRNA ligase, cytoplasmic OS=Homo sapiens GN=SARS PE=1 SV=3	0	19.862	16	5	6	5	1	514	58.7	6.43	7.27	5
FALSE	High	Master Protein	P49189	4-trimethylaminobutyraldehyde dehydrogenase OS=Homo sapiens GN=ALDH9A1 PE=1 SV=3	0	14.837	17	5	5	5	1	494	53.8	5.87	3.49	5
FALSE	High	Master Protein	P28070	Proteasome subunit beta type-4 OS=Homo sapiens GN=PSMB4 PE=1 SV=4	0	33.049	32	5	9	5	1	264	29.2	5.97	14.94	5
FALSE	High	Master Protein	P15121	Aldose reductase OS=Homo sapiens GN=AKR1B1 PE=1 SV=3	0	22.792	30	5	7	5	1	316	35.8	6.98	4.18	5
FALSE	High	Master Protein	O43765	Small glutamine-rich tetratricopeptide repeat-containing protein alpha OS=Homo sapiens GN=SGTA PE=1 SV=1	0	19.829	20	5	5	5	1	313	34	4.87	10	5
FALSE	High	Master Protein	Q9H0C8	Integrin-linked kinase-associated serine/threonine phosphatase 2C OS=Homo sapiens GN=ILKAP PE=1 SV=1	0	13.314	16	5	5	5	1	392	42.9	7.09	0	5
FALSE	High	Master Protein	O43399	Tumor protein D54 OS=Homo sapiens GN=TPD52L2 PE=1 SV=2	0	22.161	45	5	5	5	1	206	22.2	5.36	9.27	5
FALSE	High	Master Protein	P39687	Acidic leucine-rich nuclear phosphoprotein 32 family member A OS=Homo sapiens GN=ANP32A PE=1 SV=1	0	59.797	43	10	21	5	1	249	28.6	4.09	28.24	10
FALSE	High	Master Protein	Q6IBS0	Twinfilin-2 OS=Homo sapiens GN=TWF2 PE=1 SV=2	0	24.294	24	5	7	5	1	349	39.5	6.84	7.6	5
FALSE	High	Master Protein	P46109	Crk-like protein OS=Homo sapiens GN=CRKL PE=1 SV=1	0	21.824	29	5	5	5	1	303	33.8	6.74	5.33	5
FALSE	High	Master Protein	P11172	Uridine 5'-monophosphate synthase OS=Homo sapiens GN=UMPS PE=1 SV=1	0	12.948	13	5	5	5	1	480	52.2	7.24	0	5
FALSE	High	Master Protein	Q01581	Hydroxymethylglutaryl-CoA synthase, cytoplasmic OS=Homo sapiens GN=HMGCS1 PE=1 SV=2	0	16.89	16	5	5	5	1	520	57.3	5.41	7.71	5
FALSE	High	Master Protein	P49748	Very long-chain specific acyl-CoA dehydrogenase, mitochondrial OS=Homo sapiens GN=ACADVL PE=1 SV=1	0	15.906	9	5	5	5	1	655	70.3	8.75	6.84	5
FALSE	High	Master Protein	Q13526	Peptidyl-prolyl cis-trans isomerase NIMA-interacting 1 OS=Homo sapiens GN=PIN1 PE=1 SV=1	0	30.592	44	5	7	5	1	163	18.2	8.82	10.02	5
FALSE	High	Master Protein	Q9BQ39	ATP-dependent RNA helicase DDX50 OS=Homo sapiens GN=DDX50 PE=1 SV=1	0	22.475	13	7	7	5	1	737	82.5	9.17	7.84	7
FALSE	High	Master Protein	Q04837	Single-stranded DNA-binding protein, mitochondrial OS=Homo sapiens GN=SSBP1 PE=1 SV=1	0	21.204	47	5	8	5	1	148	17.2	9.6	9.52	5
FALSE	High	Master Protein	O60231	Putative pre-mRNA-splicing factor ATP-dependent RNA helicase DHX16 OS=Homo sapiens GN=DHX16 PE=1 SV=2	0	13.804	6	5	5	5	1	1041	119.2	6.8	1.61	5
FALSE	High	Master Protein	P19367	Hexokinase-1 OS=Homo sapiens GN=HK1 PE=1 SV=3	0	21.549	8	6	6	5	1	917	102.4	6.8	5.51	6
FALSE	High	Master Protein	Q13011	Delta(3,5)-Delta(2,4)-dienoyl-CoA isomerase, mitochondrial OS=Homo sapiens GN=ECH1 PE=1 SV=2	0	20.749	24	5	5	5	1	328	35.8	8	10.79	5
FALSE	High	Master Protein	Q9UBT2	SUMO-activating enzyme subunit 2 OS=Homo sapiens GN=UBA2 PE=1 SV=2	0	16.025	18	5	5	5	1	640	71.2	5.29	5.99	5
FALSE	High	Master Protein	P20042	Eukaryotic translation initiation factor 2 subunit 2 OS=Homo sapiens GN=EIF2S2 PE=1 SV=2	0	16.015	15	5	7	5	1	333	38.4	5.8	0	5
FALSE	High	Master Protein	P13612	Integrin alpha-4 OS=Homo sapiens GN=ITGA4 PE=1 SV=3	0	13.536	7	5	5	5	1	1032	114.8	6.48	0	5
FALSE	High	Master Protein	P59998	Actin-related protein 2/3 complex subunit 4 OS=Homo sapiens GN=ARPC4 PE=1 SV=3	0	26.033	34	5	9	5	1	168	19.7	8.43	19.36	5
FALSE	High	Master Protein	P29350	Tyrosine-protein phosphatase non-receptor type 6 OS=Homo sapiens GN=PTPN6 PE=1 SV=1	0	17.007	12	5	5	5	1	595	67.5	7.78	4.42	5
FALSE	High	Master Protein	Q15257	Serine/threonine-protein phosphatase 2A activator OS=Homo sapiens GN=PPP2R4 PE=1 SV=3	0	12.018	23	5	6	5	1	358	40.6	5.94	5.69	5
FALSE	High	Master Protein	P49721	Proteasome subunit beta type-2 OS=Homo sapiens GN=PSMB2 PE=1 SV=1	0	19.458	32	5	8	5	1	201	22.8	7.02	11.43	5
FALSE	High	Master Protein	O95861	3'(2'),5'-bisphosphate nucleotidase 1 OS=Homo sapiens GN=BPNT1 PE=1 SV=1	0	16.896	19	5	5	5	1	308	33.4	5.69	9.09	5
FALSE	High	Master Protein	Q13867	Bleomycin hydrolase OS=Homo sapiens GN=BLMH PE=1 SV=1	0	20.974	18	5	5	5	1	455	52.5	6.27	5.95	5
FALSE	High	Master Protein	Q8WWM7	Ataxin-2-like protein OS=Homo sapiens GN=ATXN2L PE=1 SV=2	0	16.991	9	5	6	5	1	1075	113.3	8.59	2.97	5
FALSE	High	Master Protein	P54886	Delta-1-pyrroline-5-carboxylate synthase OS=Homo sapiens GN=ALDH18A1 PE=1 SV=2	0	16.712	9	5	5	5	1	795	87.2	7.12	6.93	5
FALSE	High	Master Protein	P63010	AP-2 complex subunit beta OS=Homo sapiens GN=AP2B1 PE=1 SV=1	0	26.935	9	8	9	5	1	937	104.5	5.38	11.43	8
FALSE	High	Master Protein	P28062	Proteasome subunit beta type-8 OS=Homo sapiens GN=PSMB8 PE=1 SV=3	0	24.048	27	5	7	5	1	276	30.3	7.43	6.2	5
FALSE	High	Master Protein	P63151	Serine/threonine-protein phosphatase 2A 55 kDa regulatory subunit B alpha isoform OS=Homo sapiens GN=PPP2R2A PE=1 SV=1	0	17.778	16	5	5	5	1	447	51.7	6.2	6.18	5
FALSE	High	Master Protein	P23634	Plasma membrane calcium-transporting ATPase 4 OS=Homo sapiens GN=ATP2B4 PE=1 SV=2	0	12.544	6	5	5	5	1	1241	137.8	6.6	4.01	5
FALSE	High	Master Protein	P56537	Eukaryotic translation initiation factor 6 OS=Homo sapiens GN=EIF6 PE=1 SV=1	0	32.654	37	5	9	5	1	245	26.6	4.68	17.49	5
FALSE	High	Master Protein	Q15370	Elongin-B OS=Homo sapiens GN=ELOB PE=1 SV=1	0	20.112	78	5	7	5	1	118	13.1	4.88	5.24	5
FALSE	High	Master Protein	P06748	Nucleophosmin OS=Homo sapiens GN=NPM1 PE=1 SV=2	0	117.647	34	5	36	5	1	294	32.6	4.78	89.1	5
FALSE	High	Master Protein	Q6P2E9	Enhancer of mRNA-decapping protein 4 OS=Homo sapiens GN=EDC4 PE=1 SV=1	0	14.861	6	5	5	5	1	1401	151.6	5.86	4.09	5
FALSE	High	Master Protein	P51665	26S proteasome non-ATPase regulatory subunit 7 OS=Homo sapiens GN=PSMD7 PE=1 SV=2	0	21.263	22	5	6	5	1	324	37	6.77	8.82	5
FALSE	High	Master Protein	Q9BVP2	Guanine nucleotide-binding protein-like 3 OS=Homo sapiens GN=GNL3 PE=1 SV=2	0	21.05	14	5	5	5	1	549	62	9.16	4.24	5
FALSE	High	Master Protein	Q14683	Structural maintenance of chromosomes protein 1A OS=Homo sapiens GN=SMC1A PE=1 SV=2	0	15.685	6	5	5	5	1	1233	143.1	7.64	5.88	5
FALSE	High	Master Protein	P35249	Replication factor C subunit 4 OS=Homo sapiens GN=RFC4 PE=1 SV=2	0	21.705	15	5	6	5	1	363	39.7	8.02	7.86	5
FALSE	High	Master Protein	P10155	60 kDa SS-A/Ro ribonucleoprotein OS=Homo sapiens GN=TROVE2 PE=1 SV=2	0	16.523	14	5	5	5	1	538	60.6	8.03	3.3	5
FALSE	High	Master Protein	P62979	Ubiquitin-40S ribosomal protein S27a OS=Homo sapiens GN=RPS27A PE=1 SV=2	0	39.648	40	5	16	5	1	156	18	9.64	28.2	5
FALSE	High	Master Protein	Q99986	Serine/threonine-protein kinase VRK1 OS=Homo sapiens GN=VRK1 PE=1 SV=1	0	20.293	12	5	5	5	1	396	45.4	8.91	11.57	5
FALSE	High	Master Protein	Q9ULV4	Coronin-1C OS=Homo sapiens GN=CORO1C PE=1 SV=1	0	21.501	18	5	5	5	1	474	53.2	7.08	9.08	5
FALSE	High	Master Protein	O00541	Pescadillo homolog OS=Homo sapiens GN=PES1 PE=1 SV=1	0	14.905	10	5	6	5	1	588	68	7.33	2.01	5
FALSE	High	Master Protein	Q02880	DNA topoisomerase 2-beta OS=Homo sapiens GN=TOP2B PE=1 SV=3	0	37.698	8	10	13	5	1	1626	183.2	8	14.76	10
FALSE	High	Master Protein	Q15102	Platelet-activating factor acetylhydrolase IB subunit gamma OS=Homo sapiens GN=PAFAH1B3 PE=1 SV=1	0	14.871	24	5	7	5	1	231	25.7	6.84	8.09	5
FALSE	High	Master Protein	P63208	S-phase kinase-associated protein 1 OS=Homo sapiens GN=SKP1 PE=1 SV=2	0	20.071	39	5	5	5	1	163	18.6	4.54	5.42	5
FALSE	High	Master Protein	Q8IWS0	PHD finger protein 6 OS=Homo sapiens GN=PHF6 PE=1 SV=1	0	15.911	19	5	6	5	1	365	41.3	8.68	4.25	5
FALSE	High	Master Protein	Q12874	Splicing factor 3A subunit 3 OS=Homo sapiens GN=SF3A3 PE=1 SV=1	0	24.252	13	5	6	5	1	501	58.8	5.38	7.94	5
FALSE	High	Master Protein	Q9UL46	Proteasome activator complex subunit 2 OS=Homo sapiens GN=PSME2 PE=1 SV=4	0	18.525	36	5	6	5	1	239	27.4	5.73	7.91	5
FALSE	High	Master Protein	Q9BRA2	Thioredoxin domain-containing protein 17 OS=Homo sapiens GN=TXNDC17 PE=1 SV=1	0	18.376	54	5	6	5	1	123	13.9	5.52	6.21	5
FALSE	High	Master Protein	Q96H79	Zinc finger CCCH-type antiviral protein 1-like OS=Homo sapiens GN=ZC3HAV1L PE=1 SV=2	0	18.324	37	5	6	5	1	300	32.9	8.13	2.45	5
FALSE	High	Master Protein	P15153	Ras-related C3 botulinum toxin substrate 2 OS=Homo sapiens GN=RAC2 PE=1 SV=1	0	27.528	48	8	16	5	1	192	21.4	7.61	14.57	8
FALSE	High	Master Protein	Q13561	Dynactin subunit 2 OS=Homo sapiens GN=DCTN2 PE=1 SV=4	0	20.243	14	5	5	5	1	401	44.2	5.21	9.09	5
FALSE	High	Master Protein	P35250	Replication factor C subunit 2 OS=Homo sapiens GN=RFC2 PE=1 SV=3	0	17.519	19	5	5	5	1	354	39.1	6.44	5.89	5
FALSE	High	Master Protein	P62910	60S ribosomal protein L32 OS=Homo sapiens GN=RPL32 PE=1 SV=2	0	30.052	34	5	10	5	1	135	15.9	11.33	18.14	5
FALSE	High	Master Protein	Q9NTK5	Obg-like ATPase 1 OS=Homo sapiens GN=OLA1 PE=1 SV=2	0	19.009	20	5	5	5	1	396	44.7	7.81	7.02	5
FALSE	High	Master Protein	Q12907	Vesicular integral-membrane protein VIP36 OS=Homo sapiens GN=LMAN2 PE=1 SV=1	0	19.909	21	5	6	5	1	356	40.2	6.95	7.85	5
FALSE	High	Master Protein	P28331	NADH-ubiquinone oxidoreductase 75 kDa subunit, mitochondrial OS=Homo sapiens GN=NDUFS1 PE=1 SV=3	0	19.493	10	5	5	5	1	727	79.4	6.23	10.12	5
FALSE	High	Master Protein	Q15056	Eukaryotic translation initiation factor 4H OS=Homo sapiens GN=EIF4H PE=1 SV=5	0	28.759	38	5	9	5	1	248	27.4	7.23	9.95	5
FALSE	High	Master Protein	Q13347	Eukaryotic translation initiation factor 3 subunit I OS=Homo sapiens GN=EIF3I PE=1 SV=1	0	18.944	30	5	5	5	1	325	36.5	5.64	6.79	5
FALSE	High	Master Protein	O75494	Serine/arginine-rich splicing factor 10 OS=Homo sapiens GN=SRSF10 PE=1 SV=1	0	15.494	15	4	5	4	1	262	31.3	11.27	9.2	4
FALSE	High	Master Protein	P61604	10 kDa heat shock protein, mitochondrial OS=Homo sapiens GN=HSPE1 PE=1 SV=2	0	20.332	42	4	13	4	1	102	10.9	8.92	19.31	4
FALSE	High	Master Protein	Q8WXX5	DnaJ homolog subfamily C member 9 OS=Homo sapiens GN=DNAJC9 PE=1 SV=1	0	24.158	27	4	5	4	1	260	29.9	5.73	7.21	4
FALSE	High	Master Protein	Q10570	Cleavage and polyadenylation specificity factor subunit 1 OS=Homo sapiens GN=CPSF1 PE=1 SV=2	0	9.036	3	4	4	4	1	1443	160.8	6.4	2.38	4
FALSE	High	Master Protein	Q9ULW0	Targeting protein for Xklp2 OS=Homo sapiens GN=TPX2 PE=1 SV=2	0	9.512	8	4	4	4	1	747	85.6	9.23	0	4
FALSE	High	Master Protein	Q99426	Tubulin-folding cofactor B OS=Homo sapiens GN=TBCB PE=1 SV=2	0	13.694	22	4	4	4	1	244	27.3	5.15	5.96	4
FALSE	High	Master Protein	Q96EE3	Nucleoporin SEH1 OS=Homo sapiens GN=SEH1L PE=1 SV=3	0	14.028	19	4	4	4	1	360	39.6	8.09	6.38	4
FALSE	High	Master Protein	P17174	Aspartate aminotransferase, cytoplasmic OS=Homo sapiens GN=GOT1 PE=1 SV=3	0	15.526	17	4	4	4	1	413	46.2	7.01	7.56	4
FALSE	High	Master Protein	Q9NTI5	Sister chromatid cohesion protein PDS5 homolog B OS=Homo sapiens GN=PDS5B PE=1 SV=1	0	11.888	4	4	4	4	1	1447	164.6	8.47	0	4
FALSE	High	Master Protein	O75947	ATP synthase subunit d, mitochondrial OS=Homo sapiens GN=ATP5H PE=1 SV=3	0	20.204	47	4	6	4	1	161	18.5	5.3	5.16	4
FALSE	High	Master Protein	P11177	Pyruvate dehydrogenase E1 component subunit beta, mitochondrial OS=Homo sapiens GN=PDHB PE=1 SV=3	0	12.39	13	4	4	4	1	359	39.2	6.65	4.75	4
FALSE	High	Master Protein	P09543	2',3'-cyclic-nucleotide 3'-phosphodiesterase OS=Homo sapiens GN=CNP PE=1 SV=2	0	16.291	17	4	4	4	1	421	47.5	9.07	2.46	4
FALSE	High	Master Protein	Q8NI27	THO complex subunit 2 OS=Homo sapiens GN=THOC2 PE=1 SV=2	0	12.222	3	4	4	4	1	1593	182.7	8.44	0	4
FALSE	High	Master Protein	E9PAV3	Nascent polypeptide-associated complex subunit alpha, muscle-specific form OS=Homo sapiens GN=NACA PE=1 SV=1	0	27.499	3	4	9	4	1	2078	205.3	9.58	22.93	4
FALSE	High	Master Protein	Q16763	Ubiquitin-conjugating enzyme E2 S OS=Homo sapiens GN=UBE2S PE=1 SV=2	0	11.978	30	4	4	4	1	222	23.8	8.38	2	4
FALSE	High	Master Protein	O00139	Kinesin-like protein KIF2A OS=Homo sapiens GN=KIF2A PE=1 SV=3	0	14.636	6	4	4	4	1	706	79.9	6.68	2.3	4
FALSE	High	Master Protein	Q08752	Peptidyl-prolyl cis-trans isomerase D OS=Homo sapiens GN=PPID PE=1 SV=3	0	12.995	15	4	4	4	1	370	40.7	7.21	3.96	4
FALSE	High	Master Protein	P55769	NHP2-like protein 1 OS=Homo sapiens GN=SNU13 PE=1 SV=3	0	18.669	40	4	7	4	1	128	14.2	8.46	8.04	4
FALSE	High	Master Protein	Q14011	Cold-inducible RNA-binding protein OS=Homo sapiens GN=CIRBP PE=1 SV=1	0	14.774	33	4	4	4	1	172	18.6	9.51	5.35	4
FALSE	High	Master Protein	Q96C86	m7GpppX diphosphatase OS=Homo sapiens GN=DCPS PE=1 SV=2	0	12.423	17	4	4	4	1	337	38.6	6.38	2.82	4
FALSE	High	Master Protein	P46060	Ran GTPase-activating protein 1 OS=Homo sapiens GN=RANGAP1 PE=1 SV=1	0	12.769	11	4	4	4	1	587	63.5	4.68	7.23	4
FALSE	High	Master Protein	P13807	Glycogen [starch] synthase, muscle OS=Homo sapiens GN=GYS1 PE=1 SV=2	0	11.633	9	4	4	4	1	737	83.7	6.18	2.14	4
FALSE	High	Master Protein	O43491	Band 4.1-like protein 2 OS=Homo sapiens GN=EPB41L2 PE=1 SV=1	0	17.145	7	4	4	4	1	1005	112.5	5.44	2.23	4
FALSE	High	Master Protein	P35244	Replication protein A 14 kDa subunit OS=Homo sapiens GN=RPA3 PE=1 SV=1	0	12.35	57	4	5	4	1	121	13.6	5.08	2.64	4
FALSE	High	Master Protein	Q6JBY9	CapZ-interacting protein OS=Homo sapiens GN=RCSD1 PE=1 SV=1	0	17.264	23	4	4	4	1	416	44.5	5.4	6.08	4
FALSE	High	Master Protein	P30520	Adenylosuccinate synthetase isozyme 2 OS=Homo sapiens GN=ADSS PE=1 SV=3	0	20.001	13	4	5	4	1	456	50.1	6.55	6.43	4
FALSE	High	Master Protein	P49006	MARCKS-related protein OS=Homo sapiens GN=MARCKSL1 PE=1 SV=2	0	24.947	58	4	5	4	1	195	19.5	4.67	10.97	4
FALSE	High	Master Protein	Q02413	Desmoglein-1 OS=Homo sapiens GN=DSG1 PE=1 SV=2	0	13.5	7	4	5	4	1	1049	113.7	5.03	2.33	4
FALSE	High	Master Protein	O14602	Eukaryotic translation initiation factor 1A, Y-chromosomal OS=Homo sapiens GN=EIF1AY PE=1 SV=4	0	13.137	50	4	4	4	1	144	16.4	5.24	6.99	4
FALSE	High	Master Protein	Q9NTZ6	RNA-binding protein 12 OS=Homo sapiens GN=RBM12 PE=1 SV=1	0	10.683	6	4	4	4	1	932	97.3	8.63	4.04	4
FALSE	High	Master Protein	P68363	Tubulin alpha-1B chain OS=Homo sapiens GN=TUBA1B PE=1 SV=1	0	187.076	80	20	134	4	1	451	50.1	5.06	285.5	20
FALSE	High	Master Protein	Q14257	Reticulocalbin-2 OS=Homo sapiens GN=RCN2 PE=1 SV=1	0	14.897	23	4	4	4	1	317	36.9	4.4	2.8	4
FALSE	High	Master Protein	Q9HAV4	Exportin-5 OS=Homo sapiens GN=XPO5 PE=1 SV=1	0	13.936	5	4	4	4	1	1204	136.2	5.8	4.44	4
FALSE	High	Master Protein	P55084	Trifunctional enzyme subunit beta, mitochondrial OS=Homo sapiens GN=HADHB PE=1 SV=3	0	11.023	19	4	4	4	1	474	51.3	9.41	2.8	4
FALSE	High	Master Protein	Q14694	Ubiquitin carboxyl-terminal hydrolase 10 OS=Homo sapiens GN=USP10 PE=1 SV=2	0	10.649	8	4	4	4	1	798	87.1	5.31	1.63	4
FALSE	High	Master Protein	Q8NBS9	Thioredoxin domain-containing protein 5 OS=Homo sapiens GN=TXNDC5 PE=1 SV=2	0	14.699	16	4	5	4	1	432	47.6	5.97	2.01	4
FALSE	High	Master Protein	P13693	Translationally-controlled tumor protein OS=Homo sapiens GN=TPT1 PE=1 SV=1	0	30.812	44	4	7	4	1	172	19.6	4.93	12.57	4
FALSE	High	Master Protein	Q9BQA1	Methylosome protein 50 OS=Homo sapiens GN=WDR77 PE=1 SV=1	0	10.427	27	4	4	4	1	342	36.7	5.17	2.78	4
FALSE	High	Master Protein	P13995	Bifunctional methylenetetrahydrofolate dehydrogenase/cyclohydrolase, mitochondrial OS=Homo sapiens GN=MTHFD2 PE=1 SV=2	0	12.931	19	4	4	4	1	350	37.9	8.73	4.69	4
FALSE	High	Master Protein	Q9NSE4	Isoleucine--tRNA ligase, mitochondrial OS=Homo sapiens GN=IARS2 PE=1 SV=2	0	13.678	5	4	4	4	1	1012	113.7	7.2	5	4
FALSE	High	Master Protein	Q9NYF8	Bcl-2-associated transcription factor 1 OS=Homo sapiens GN=BCLAF1 PE=1 SV=2	0	14.006	6	4	5	4	1	920	106.1	9.98	2.28	4
FALSE	High	Master Protein	Q8NI36	WD repeat-containing protein 36 OS=Homo sapiens GN=WDR36 PE=1 SV=1	0	7.751	5	4	4	4	1	951	105.3	7.53	0	4
FALSE	High	Master Protein	Q9NZI8	Insulin-like growth factor 2 mRNA-binding protein 1 OS=Homo sapiens GN=IGF2BP1 PE=1 SV=2	0	22.834	12	5	6	4	1	577	63.4	9.2	8.38	5
FALSE	High	Master Protein	Q9BPX3	Condensin complex subunit 3 OS=Homo sapiens GN=NCAPG PE=1 SV=1	0	18.39	5	4	4	4	1	1015	114.3	5.59	8.58	4
FALSE	High	Master Protein	Q00796	Sorbitol dehydrogenase OS=Homo sapiens GN=SORD PE=1 SV=4	0	16.152	22	4	5	4	1	357	38.3	7.97	8.03	4
FALSE	High	Master Protein	Q92522	Histone H1x OS=Homo sapiens GN=H1FX PE=1 SV=1	0	16.266	16	4	6	4	1	213	22.5	10.76	7.64	4
FALSE	High	Master Protein	O75694	Nuclear pore complex protein Nup155 OS=Homo sapiens GN=NUP155 PE=1 SV=1	0	12.523	5	4	4	4	1	1391	155.1	6.16	2.26	4
FALSE	High	Master Protein	P26640	Valine--tRNA ligase OS=Homo sapiens GN=VARS PE=1 SV=4	0	19.658	5	4	4	4	1	1264	140.4	7.59	5.01	4
FALSE	High	Master Protein	O00429	Dynamin-1-like protein OS=Homo sapiens GN=DNM1L PE=1 SV=2	0	11.339	7	4	4	4	1	736	81.8	6.81	3.99	4
FALSE	High	Master Protein	Q00325	Phosphate carrier protein, mitochondrial OS=Homo sapiens GN=SLC25A3 PE=1 SV=2	0	11.603	10	4	4	4	1	362	40.1	9.38	3.13	4
FALSE	High	Master Protein	P49257	Protein ERGIC-53 OS=Homo sapiens GN=LMAN1 PE=1 SV=2	0	16.127	13	4	4	4	1	510	57.5	6.77	5.88	4
FALSE	High	Master Protein	P25787	Proteasome subunit alpha type-2 OS=Homo sapiens GN=PSMA2 PE=1 SV=2	0	23.389	32	4	7	4	1	234	25.9	7.43	12.12	4
FALSE	High	Master Protein	Q9UBE0	SUMO-activating enzyme subunit 1 OS=Homo sapiens GN=SAE1 PE=1 SV=1	0	21.761	18	4	6	4	1	346	38.4	5.3	4.87	4
FALSE	High	Master Protein	Q96JB5	CDK5 regulatory subunit-associated protein 3 OS=Homo sapiens GN=CDK5RAP3 PE=1 SV=2	0	11.962	14	5	5	4	1	506	56.9	4.75	1.8	5
FALSE	High	Master Protein	O60216	Double-strand-break repair protein rad21 homolog OS=Homo sapiens GN=RAD21 PE=1 SV=2	0	15.667	11	4	4	4	1	631	71.6	4.65	4.73	4
FALSE	High	Master Protein	P08621	U1 small nuclear ribonucleoprotein 70 kDa OS=Homo sapiens GN=SNRNP70 PE=1 SV=2	0	12.256	11	4	8	4	1	437	51.5	9.94	1.81	4
FALSE	High	Master Protein	P30085	UMP-CMP kinase OS=Homo sapiens GN=CMPK1 PE=1 SV=3	0	17.133	27	4	8	4	1	196	22.2	5.57	4.11	4
FALSE	High	Master Protein	Q8NFW8	N-acylneuraminate cytidylyltransferase OS=Homo sapiens GN=CMAS PE=1 SV=2	0	11.874	16	4	4	4	1	434	48.3	7.93	0	4
FALSE	High	Master Protein	Q9BQE3	Tubulin alpha-1C chain OS=Homo sapiens GN=TUBA1C PE=1 SV=1	0	161.651	75	20	99	4	1	449	49.9	5.1	201.1	20
FALSE	High	Master Protein	P83731	60S ribosomal protein L24 OS=Homo sapiens GN=RPL24 PE=1 SV=1	0	19.692	25	4	8	4	1	157	17.8	11.25	19.04	4
FALSE	High	Master Protein	Q5JPE7	Nodal modulator 2 OS=Homo sapiens GN=NOMO2 PE=1 SV=1	0	14.513	5	4	4	4	1	1267	139.4	5.76	5.7	4
FALSE	High	Master Protein	P45973	Chromobox protein homolog 5 OS=Homo sapiens GN=CBX5 PE=1 SV=1	0	23.458	29	5	8	4	1	191	22.2	5.86	10.08	5
FALSE	High	Master Protein	O96019	Actin-like protein 6A OS=Homo sapiens GN=ACTL6A PE=1 SV=1	0	17.405	17	4	4	4	1	429	47.4	5.6	10.67	4
FALSE	High	Master Protein	P37268	Squalene synthase OS=Homo sapiens GN=FDFT1 PE=1 SV=1	0	9.801	14	4	4	4	1	417	48.1	6.54	3.48	4
FALSE	High	Master Protein	P57737	Coronin-7 OS=Homo sapiens GN=CORO7 PE=1 SV=2	0	9.942	10	4	4	4	1	925	100.5	5.8	2.16	4
FALSE	High	Master Protein	P46459	Vesicle-fusing ATPase OS=Homo sapiens GN=NSF PE=1 SV=3	0	11.597	5	4	4	4	1	744	82.5	6.95	4.68	4
FALSE	High	Master Protein	Q9Y383	Putative RNA-binding protein Luc7-like 2 OS=Homo sapiens GN=LUC7L2 PE=1 SV=2	0	20.975	20	5	5	4	1	392	46.5	10.01	5.71	5
FALSE	High	Master Protein	Q15555	Microtubule-associated protein RP/EB family member 2 OS=Homo sapiens GN=MAPRE2 PE=1 SV=1	0	13.416	20	4	4	4	1	327	37	5.57	2.59	4
FALSE	High	Master Protein	Q63HN8	E3 ubiquitin-protein ligase RNF213 OS=Homo sapiens GN=RNF213 PE=1 SV=3	0	13.87	1	4	4	4	1	5207	591	6.48	3.54	4
FALSE	High	Master Protein	P62851	40S ribosomal protein S25 OS=Homo sapiens GN=RPS25 PE=1 SV=1	0	15.718	24	4	8	4	1	125	13.7	10.11	13.86	4
FALSE	High	Master Protein	Q9NP72	Ras-related protein Rab-18 OS=Homo sapiens GN=RAB18 PE=1 SV=1	0	14.224	25	4	4	4	1	206	23	5.24	4.5	4
FALSE	High	Master Protein	O75439	Mitochondrial-processing peptidase subunit beta OS=Homo sapiens GN=PMPCB PE=1 SV=2	0	10.805	10	4	4	4	1	489	54.3	6.83	3.96	4
FALSE	High	Master Protein	P31350	Ribonucleoside-diphosphate reductase subunit M2 OS=Homo sapiens GN=RRM2 PE=1 SV=1	0	20.487	16	4	4	4	1	389	44.8	5.38	9.95	4
FALSE	High	Master Protein	P14678	Small nuclear ribonucleoprotein-associated proteins B and B' OS=Homo sapiens GN=SNRPB PE=1 SV=2	0	21.738	21	4	10	4	1	240	24.6	11.19	18.92	4
FALSE	High	Master Protein	P30042	ES1 protein homolog, mitochondrial OS=Homo sapiens GN=C21orf33 PE=1 SV=3	0	15.49	22	4	5	4	1	268	28.2	8.27	3.41	4
FALSE	High	Master Protein	Q9BSD7	Cancer-related nucleoside-triphosphatase OS=Homo sapiens GN=NTPCR PE=1 SV=1	0	14.121	33	4	4	4	1	190	20.7	9.54	4.34	4
FALSE	High	Master Protein	Q16775	Hydroxyacylglutathione hydrolase, mitochondrial OS=Homo sapiens GN=HAGH PE=1 SV=2	0	8.33	22	4	4	4	1	308	33.8	8.12	2.23	4
FALSE	High	Master Protein	P33240	Cleavage stimulation factor subunit 2 OS=Homo sapiens GN=CSTF2 PE=1 SV=1	0	9.977	7	4	4	4	1	577	60.9	6.83	2.26	4
FALSE	High	Master Protein	P40616	ADP-ribosylation factor-like protein 1 OS=Homo sapiens GN=ARL1 PE=1 SV=1	0	11.781	35	4	4	4	1	181	20.4	5.72	2.31	4
FALSE	High	Master Protein	P50914	60S ribosomal protein L14 OS=Homo sapiens GN=RPL14 PE=1 SV=4	0	30.652	21	4	11	4	1	215	23.4	10.93	19.38	4
FALSE	High	Master Protein	P19784	Casein kinase II subunit alpha' OS=Homo sapiens GN=CSNK2A2 PE=1 SV=1	0	12.611	18	4	4	4	1	350	41.2	8.56	5	4
FALSE	High	Master Protein	Q13247	Serine/arginine-rich splicing factor 6 OS=Homo sapiens GN=SRSF6 PE=1 SV=2	0	14.496	18	5	7	4	1	344	39.6	11.43	7.71	5
FALSE	High	Master Protein	Q53GS9	U4/U6.U5 tri-snRNP-associated protein 2 OS=Homo sapiens GN=USP39 PE=1 SV=2	0	9.995	10	4	4	4	1	565	65.3	8.91	1.89	4
FALSE	High	Master Protein	Q9BZE4	Nucleolar GTP-binding protein 1 OS=Homo sapiens GN=GTPBP4 PE=1 SV=3	0	12.65	9	4	4	4	1	634	73.9	9.5	5.49	4
FALSE	High	Master Protein	P68036	Ubiquitin-conjugating enzyme E2 L3 OS=Homo sapiens GN=UBE2L3 PE=1 SV=1	0	22.115	52	4	8	4	1	154	17.9	8.51	10.47	4
FALSE	High	Master Protein	O43447	Peptidyl-prolyl cis-trans isomerase H OS=Homo sapiens GN=PPIH PE=1 SV=1	0	16.404	31	4	4	4	1	177	19.2	8.07	5.39	4
FALSE	High	Master Protein	Q9NVI7	ATPase family AAA domain-containing protein 3A OS=Homo sapiens GN=ATAD3A PE=1 SV=2	0	15.295	8	4	4	4	1	634	71.3	8.98	9.62	4
FALSE	High	Master Protein	P26583	High mobility group protein B2 OS=Homo sapiens GN=HMGB2 PE=1 SV=2	0	30.29	24	5	17	4	1	209	24	7.81	32.74	5
FALSE	High	Master Protein	O60880	SH2 domain-containing protein 1A OS=Homo sapiens GN=SH2D1A PE=1 SV=1	0	17.932	45	4	6	4	1	128	14.2	8.56	9.25	4
FALSE	High	Master Protein	P27361	Mitogen-activated protein kinase 3 OS=Homo sapiens GN=MAPK3 PE=1 SV=4	0	9.626	11	4	5	4	1	379	43.1	6.74	0	4
FALSE	High	Master Protein	P61289	Proteasome activator complex subunit 3 OS=Homo sapiens GN=PSME3 PE=1 SV=1	0	22.068	21	4	8	4	1	254	29.5	5.95	10.73	4
FALSE	High	Master Protein	O75400	Pre-mRNA-processing factor 40 homolog A OS=Homo sapiens GN=PRPF40A PE=1 SV=2	0	13.898	7	4	4	4	1	957	108.7	7.56	6.18	4
FALSE	High	Master Protein	P61201	COP9 signalosome complex subunit 2 OS=Homo sapiens GN=COPS2 PE=1 SV=1	0	10.243	12	4	4	4	1	443	51.6	5.53	3.06	4
FALSE	High	Master Protein	Q99615	DnaJ homolog subfamily C member 7 OS=Homo sapiens GN=DNAJC7 PE=1 SV=2	0	11.876	11	4	4	4	1	494	56.4	6.96	4	4
FALSE	High	Master Protein	Q9H4M9	EH domain-containing protein 1 OS=Homo sapiens GN=EHD1 PE=1 SV=2	0	10.356	16	4	4	4	1	534	60.6	6.83	0	4
FALSE	High	Master Protein	Q00059	Transcription factor A, mitochondrial OS=Homo sapiens GN=TFAM PE=1 SV=1	0	10.953	17	4	4	4	1	246	29.1	9.72	2.1	4
FALSE	High	Master Protein	Q10471	Polypeptide N-acetylgalactosaminyltransferase 2 OS=Homo sapiens GN=GALNT2 PE=1 SV=1	0	15.364	12	4	4	4	1	571	64.7	8.35	6.16	4
FALSE	High	Master Protein	P31946	14-3-3 protein beta/alpha OS=Homo sapiens GN=YWHAB PE=1 SV=3	0	40.474	35	7	15	4	1	246	28.1	4.83	21.67	7
FALSE	High	Master Protein	P50416	Carnitine O-palmitoyltransferase 1, liver isoform OS=Homo sapiens GN=CPT1A PE=1 SV=2	0	8.265	6	4	4	4	1	773	88.3	8.65	0	4
FALSE	High	Master Protein	Q9H0D6	5'-3' exoribonuclease 2 OS=Homo sapiens GN=XRN2 PE=1 SV=1	0	15.52	7	4	4	4	1	950	108.5	7.47	2.34	4
FALSE	High	Master Protein	O14776	Transcription elongation regulator 1 OS=Homo sapiens GN=TCERG1 PE=1 SV=2	0	11.058	4	4	4	4	1	1098	123.8	8.65	6.04	4
FALSE	High	Master Protein	P21399	Cytoplasmic aconitate hydratase OS=Homo sapiens GN=ACO1 PE=1 SV=3	0	8.389	9	4	4	4	1	889	98.3	6.68	1.83	4
FALSE	High	Master Protein	O43719	HIV Tat-specific factor 1 OS=Homo sapiens GN=HTATSF1 PE=1 SV=1	0	7.515	4	4	4	4	1	755	85.8	4.4	1.79	4
FALSE	High	Master Protein	P49720	Proteasome subunit beta type-3 OS=Homo sapiens GN=PSMB3 PE=1 SV=2	0	27.571	27	4	7	4	1	205	22.9	6.55	12.58	4
FALSE	High	Master Protein	P26358	DNA (cytosine-5)-methyltransferase 1 OS=Homo sapiens GN=DNMT1 PE=1 SV=2	0	6.257	3	4	4	4	1	1616	183.1	7.75	1.64	4
FALSE	High	Master Protein	P18858	DNA ligase 1 OS=Homo sapiens GN=LIG1 PE=1 SV=1	0	10.587	7	4	4	4	1	919	101.7	5.62	2.62	4
FALSE	High	Master Protein	P55036	26S proteasome non-ATPase regulatory subunit 4 OS=Homo sapiens GN=PSMD4 PE=1 SV=1	0	24.293	25	5	5	4	1	377	40.7	4.79	11.16	5
FALSE	High	Master Protein	Q06265	Exosome complex component RRP45 OS=Homo sapiens GN=EXOSC9 PE=1 SV=3	0	16.991	11	4	4	4	1	439	48.9	5.29	9.5	4
FALSE	High	Master Protein	P28072	Proteasome subunit beta type-6 OS=Homo sapiens GN=PSMB6 PE=1 SV=4	0	13.278	34	4	7	4	1	239	25.3	4.92	11.12	4
FALSE	High	Master Protein	Q52LJ0	Protein FAM98B OS=Homo sapiens GN=FAM98B PE=1 SV=1	0	21.99	20	4	5	4	1	330	37.2	6.29	8.7	4
FALSE	High	Master Protein	Q9Y6C9	Mitochondrial carrier homolog 2 OS=Homo sapiens GN=MTCH2 PE=1 SV=1	0	7.729	20	4	5	4	1	303	33.3	7.97	0	4
FALSE	High	Master Protein	P62633	Cellular nucleic acid-binding protein OS=Homo sapiens GN=CNBP PE=1 SV=1	0	23.458	28	4	6	4	1	177	19.5	7.71	7.76	4
FALSE	High	Master Protein	Q13242	Serine/arginine-rich splicing factor 9 OS=Homo sapiens GN=SRSF9 PE=1 SV=1	0	14.142	21	4	5	4	1	221	25.5	8.65	5.95	4
FALSE	High	Master Protein	P52888	Thimet oligopeptidase OS=Homo sapiens GN=THOP1 PE=1 SV=2	0	11.289	9	4	4	4	1	689	78.8	6.05	5.18	4
FALSE	High	Master Protein	O14828	Secretory carrier-associated membrane protein 3 OS=Homo sapiens GN=SCAMP3 PE=1 SV=3	0	23.891	23	4	5	4	1	347	38.3	7.64	8.25	4
FALSE	High	Master Protein	O00743	Serine/threonine-protein phosphatase 6 catalytic subunit OS=Homo sapiens GN=PPP6C PE=1 SV=1	0	15.525	19	4	4	4	1	305	35.1	5.69	8.33	4
FALSE	High	Master Protein	Q2TAY7	WD40 repeat-containing protein SMU1 OS=Homo sapiens GN=SMU1 PE=1 SV=2	0	16.298	11	4	4	4	1	513	57.5	7.18	8.34	4
FALSE	High	Master Protein	Q69YN2	CWF19-like protein 1 OS=Homo sapiens GN=CWF19L1 PE=1 SV=2	0	6.721	9	4	4	4	1	538	60.6	7.24	0	4
FALSE	High	Master Protein	P53582	Methionine aminopeptidase 1 OS=Homo sapiens GN=METAP1 PE=1 SV=2	0	15.049	17	4	4	4	1	386	43.2	7.17	5.55	4
FALSE	High	Master Protein	P53992	Protein transport protein Sec24C OS=Homo sapiens GN=SEC24C PE=1 SV=3	0	12.437	5	4	4	4	1	1094	118.2	7.06	3.88	4
FALSE	High	Master Protein	P19174	1-phosphatidylinositol 4,5-bisphosphate phosphodiesterase gamma-1 OS=Homo sapiens GN=PLCG1 PE=1 SV=1	0	12.453	4	4	4	4	1	1290	148.4	6.05	5.99	4
FALSE	High	Master Protein	Q8IWX8	Calcium homeostasis endoplasmic reticulum protein OS=Homo sapiens GN=CHERP PE=1 SV=3	0	18.128	7	4	4	4	1	916	103.6	9.04	4.86	4
FALSE	High	Master Protein	P35611	Alpha-adducin OS=Homo sapiens GN=ADD1 PE=1 SV=2	0	16.115	11	4	4	4	1	737	80.9	5.83	6.11	4
FALSE	High	Master Protein	Q00341	Vigilin OS=Homo sapiens GN=HDLBP PE=1 SV=2	0	13.701	6	4	4	4	1	1268	141.4	6.87	2.29	4
FALSE	High	Master Protein	Q15149	Plectin OS=Homo sapiens GN=PLEC PE=1 SV=3	0	8.819	1	4	4	4	1	4684	531.5	5.96	0	4
FALSE	High	Master Protein	Q9P2R7	Succinate--CoA ligase [ADP-forming] subunit beta, mitochondrial OS=Homo sapiens GN=SUCLA2 PE=1 SV=3	0	11.807	8	4	4	4	1	463	50.3	7.42	4.5	4
FALSE	High	Master Protein	Q9BUT1	3-hydroxybutyrate dehydrogenase type 2 OS=Homo sapiens GN=BDH2 PE=1 SV=2	0	13.546	25	4	4	4	1	245	26.7	7.65	4.83	4
FALSE	High	Master Protein	P54920	Alpha-soluble NSF attachment protein OS=Homo sapiens GN=NAPA PE=1 SV=3	0	12.328	23	4	4	4	1	295	33.2	5.36	2.32	4
FALSE	High	Master Protein	O75475	PC4 and SFRS1-interacting protein OS=Homo sapiens GN=PSIP1 PE=1 SV=1	0	12.099	12	5	7	4	1	530	60.1	9.13	0	5
FALSE	High	Master Protein	Q14677	Clathrin interactor 1 OS=Homo sapiens GN=CLINT1 PE=1 SV=1	0	8.327	8	4	4	4	1	625	68.2	6.42	0	4
FALSE	High	Master Protein	Q9Y295	Developmentally-regulated GTP-binding protein 1 OS=Homo sapiens GN=DRG1 PE=1 SV=1	0	14.575	16	4	4	4	1	367	40.5	8.9	6.45	4
FALSE	High	Master Protein	P58546	Myotrophin OS=Homo sapiens GN=MTPN PE=1 SV=2	0	21.642	33	4	5	4	1	118	12.9	5.52	11.5	4
FALSE	High	Master Protein	Q9UHB9	Signal recognition particle subunit SRP68 OS=Homo sapiens GN=SRP68 PE=1 SV=2	0	18.866	9	4	4	4	1	627	70.7	8.56	9.89	4
FALSE	High	Master Protein	Q99729	Heterogeneous nuclear ribonucleoprotein A/B OS=Homo sapiens GN=HNRNPAB PE=1 SV=2	0	13.902	15	5	9	4	1	332	36.2	8.21	9.47	5
FALSE	High	Master Protein	Q9HAV7	GrpE protein homolog 1, mitochondrial OS=Homo sapiens GN=GRPEL1 PE=1 SV=2	0	12.643	19	4	5	4	1	217	24.3	8.12	4.5	4
FALSE	High	Master Protein	O15143	Actin-related protein 2/3 complex subunit 1B OS=Homo sapiens GN=ARPC1B PE=1 SV=3	0	25.63	22	5	7	4	1	372	40.9	8.35	8.08	5
FALSE	High	Master Protein	O75351	Vacuolar protein sorting-associated protein 4B OS=Homo sapiens GN=VPS4B PE=1 SV=2	0	13.301	17	5	5	4	1	444	49.3	7.23	4.02	5
FALSE	High	Master Protein	P61163	Alpha-centractin OS=Homo sapiens GN=ACTR1A PE=1 SV=1	0	21.776	18	4	7	4	1	376	42.6	6.64	17.08	4
FALSE	High	Master Protein	P41240	Tyrosine-protein kinase CSK OS=Homo sapiens GN=CSK PE=1 SV=1	0	13.249	12	4	5	4	1	450	50.7	7.06	2.16	4
FALSE	High	Master Protein	P23919	Thymidylate kinase OS=Homo sapiens GN=DTYMK PE=1 SV=4	0	11.033	20	4	4	4	1	212	23.8	8.27	2.44	4
FALSE	High	Master Protein	Q9UKY7	Protein CDV3 homolog OS=Homo sapiens GN=CDV3 PE=1 SV=1	0	18.539	30	4	6	4	1	258	27.3	6.4	9.49	4
FALSE	High	Master Protein	Q96EP5	DAZ-associated protein 1 OS=Homo sapiens GN=DAZAP1 PE=1 SV=1	0	15.74	17	4	5	4	1	407	43.4	8.56	5.62	4
FALSE	High	Master Protein	P21291	Cysteine and glycine-rich protein 1 OS=Homo sapiens GN=CSRP1 PE=1 SV=3	0	11.05	37	4	4	4	1	193	20.6	8.57	3.77	4
FALSE	High	Master Protein	Q9H8Y8	Golgi reassembly-stacking protein 2 OS=Homo sapiens GN=GORASP2 PE=1 SV=3	0	15.527	16	4	4	4	1	452	47.1	4.82	4.07	4
FALSE	High	Master Protein	P10599	Thioredoxin OS=Homo sapiens GN=TXN PE=1 SV=3	0	16.177	47	4	6	4	1	105	11.7	4.92	3.24	4
FALSE	High	Master Protein	P48556	26S proteasome non-ATPase regulatory subunit 8 OS=Homo sapiens GN=PSMD8 PE=1 SV=2	0	10.624	12	4	5	4	1	350	39.6	9.7	3.92	4
FALSE	High	Master Protein	P62314	Small nuclear ribonucleoprotein Sm D1 OS=Homo sapiens GN=SNRPD1 PE=1 SV=1	0	33.546	55	4	12	4	1	119	13.3	11.56	24.18	4
FALSE	High	Master Protein	Q96C19	EF-hand domain-containing protein D2 OS=Homo sapiens GN=EFHD2 PE=1 SV=1	0	15.214	20	4	5	4	1	240	26.7	5.2	6.68	4
FALSE	High	Master Protein	Q92979	Ribosomal RNA small subunit methyltransferase NEP1 OS=Homo sapiens GN=EMG1 PE=1 SV=4	0	12.751	23	4	4	4	1	244	26.7	9.17	2.31	4
FALSE	High	Master Protein	O75874	Isocitrate dehydrogenase [NADP] cytoplasmic OS=Homo sapiens GN=IDH1 PE=1 SV=2	0	10.269	13	5	5	4	1	414	46.6	7.01	1.69	5
FALSE	High	Master Protein	Q86UP2	Kinectin OS=Homo sapiens GN=KTN1 PE=1 SV=1	0	14.008	4	4	4	4	1	1357	156.2	5.64	3.82	4
FALSE	High	Master Protein	O43148	mRNA cap guanine-N7 methyltransferase OS=Homo sapiens GN=RNMT PE=1 SV=1	0	13.579	12	4	4	4	1	476	54.8	6.61	2.05	4
FALSE	High	Master Protein	Q9NZT1	Calmodulin-like protein 5 OS=Homo sapiens GN=CALML5 PE=1 SV=2	0	20.95	33	4	5	4	1	146	15.9	4.44	5.1	4
FALSE	High	Master Protein	P52948	Nuclear pore complex protein Nup98-Nup96 OS=Homo sapiens GN=NUP98 PE=1 SV=4	0	15.13	2	4	4	4	1	1817	197.5	6.4	3.76	4
FALSE	High	Master Protein	O75937	DnaJ homolog subfamily C member 8 OS=Homo sapiens GN=DNAJC8 PE=1 SV=2	0	15.492	17	4	4	4	1	253	29.8	9.06	5.72	4
FALSE	High	Master Protein	Q8TDP1	Ribonuclease H2 subunit C OS=Homo sapiens GN=RNASEH2C PE=1 SV=1	0	15.07	32	4	4	4	1	164	17.8	5.03	7.61	4
FALSE	High	Master Protein	P62269	40S ribosomal protein S18 OS=Homo sapiens GN=RPS18 PE=1 SV=3	0	17.777	25	4	13	4	1	152	17.7	10.99	19.54	4
FALSE	High	Master Protein	Q15020	Squamous cell carcinoma antigen recognized by T-cells 3 OS=Homo sapiens GN=SART3 PE=1 SV=1	0	11.662	6	4	4	4	1	963	109.9	5.57	2.05	4
FALSE	High	Master Protein	Q92922	SWI/SNF complex subunit SMARCC1 OS=Homo sapiens GN=SMARCC1 PE=1 SV=3	0	20.304	7	4	5	4	1	1105	122.8	5.76	5.09	4
FALSE	High	Master Protein	Q96CW1	AP-2 complex subunit mu OS=Homo sapiens GN=AP2M1 PE=1 SV=2	0	10.897	12	4	4	4	1	435	49.6	9.54	2.45	4
FALSE	High	Master Protein	Q08257	Quinone oxidoreductase OS=Homo sapiens GN=CRYZ PE=1 SV=1	0	17.633	22	4	4	4	1	329	35.2	8.44	5.57	4
FALSE	High	Master Protein	P18031	Tyrosine-protein phosphatase non-receptor type 1 OS=Homo sapiens GN=PTPN1 PE=1 SV=1	0	15.896	12	4	4	4	1	435	49.9	6.27	5.1	4
FALSE	High	Master Protein	Q99733	Nucleosome assembly protein 1-like 4 OS=Homo sapiens GN=NAP1L4 PE=1 SV=1	0	30.374	18	6	8	4	1	375	42.8	4.69	13.32	6
FALSE	High	Master Protein	P40925	Malate dehydrogenase, cytoplasmic OS=Homo sapiens GN=MDH1 PE=1 SV=4	0	21.094	19	4	7	4	1	334	36.4	7.36	15.83	4
FALSE	High	Master Protein	P67809	Nuclease-sensitive element-binding protein 1 OS=Homo sapiens GN=YBX1 PE=1 SV=3	0	57.117	37	9	16	4	1	324	35.9	9.88	23.05	9
FALSE	High	Master Protein	P17252	Protein kinase C alpha type OS=Homo sapiens GN=PRKCA PE=1 SV=4	0	27.028	16	7	8	4	1	672	76.7	7.05	4.93	7
FALSE	High	Master Protein	P36915	Guanine nucleotide-binding protein-like 1 OS=Homo sapiens GN=GNL1 PE=1 SV=2	0	10.934	8	4	4	4	1	607	68.6	5.8	3.49	4
FALSE	High	Master Protein	Q9UI08	Ena/VASP-like protein OS=Homo sapiens GN=EVL PE=1 SV=2	0	15.683	12	4	4	4	1	416	44.6	8.84	4.04	4
FALSE	High	Master Protein	P48426	Phosphatidylinositol 5-phosphate 4-kinase type-2 alpha OS=Homo sapiens GN=PIP4K2A PE=1 SV=2	0	11.475	14	4	4	4	1	406	46.2	6.99	3.11	4
FALSE	High	Master Protein	P61981	14-3-3 protein gamma OS=Homo sapiens GN=YWHAG PE=1 SV=2	0	26.299	46	7	15	4	1	247	28.3	4.89	16.49	7
FALSE	High	Master Protein	Q13595	Transformer-2 protein homolog alpha OS=Homo sapiens GN=TRA2A PE=1 SV=1	0	12.255	19	4	5	4	1	282	32.7	11.27	5.08	4
FALSE	High	Master Protein	P63279	SUMO-conjugating enzyme UBC9 OS=Homo sapiens GN=UBE2I PE=1 SV=1	0	18.259	42	4	8	4	1	158	18	8.66	11.34	4
FALSE	High	Master Protein	Q96HE7	ERO1-like protein alpha OS=Homo sapiens GN=ERO1A PE=1 SV=2	0	13.08	11	3	3	3	1	468	54.4	5.68	5.45	3
FALSE	High	Master Protein	O60341	Lysine-specific histone demethylase 1A OS=Homo sapiens GN=KDM1A PE=1 SV=2	0	6.195	4	3	3	3	1	852	92.8	6.52	2.16	3
FALSE	High	Master Protein	Q9NW13	RNA-binding protein 28 OS=Homo sapiens GN=RBM28 PE=1 SV=3	0	9.074	5	3	3	3	1	759	85.7	9.22	2.51	3
FALSE	High	Master Protein	Q14761	Protein tyrosine phosphatase receptor type C-associated protein OS=Homo sapiens GN=PTPRCAP PE=1 SV=1	0.001	5.75	14	3	3	3	1	206	21.2	4.55	4.32	3
FALSE	High	Master Protein	Q9H910	Hematological and neurological expressed 1-like protein OS=Homo sapiens GN=HN1L PE=1 SV=1	0	9.112	23	3	3	3	1	190	20.1	9.26	4.53	3
FALSE	High	Master Protein	O75995	SAM and SH3 domain-containing protein 3 OS=Homo sapiens GN=SASH3 PE=1 SV=2	0	11.864	16	3	3	3	1	380	41.6	5.27	6.03	3
FALSE	High	Master Protein	O43670	BUB3-interacting and GLEBS motif-containing protein ZNF207 OS=Homo sapiens GN=ZNF207 PE=1 SV=1	0	8.669	8	3	3	3	1	478	50.7	9.1	4.36	3
FALSE	High	Master Protein	Q9UKK9	ADP-sugar pyrophosphatase OS=Homo sapiens GN=NUDT5 PE=1 SV=1	0	9.915	15	3	5	3	1	219	24.3	4.94	7.76	3
FALSE	High	Master Protein	Q92747	Actin-related protein 2/3 complex subunit 1A OS=Homo sapiens GN=ARPC1A PE=1 SV=2	0	17.685	17	4	5	3	1	370	41.5	8.18	6.75	4
FALSE	High	Master Protein	P04080	Cystatin-B OS=Homo sapiens GN=CSTB PE=1 SV=2	0	19.315	46	3	4	3	1	98	11.1	7.56	9.44	3
FALSE	High	Master Protein	P38117	Electron transfer flavoprotein subunit beta OS=Homo sapiens GN=ETFB PE=1 SV=3	0	17.045	16	3	4	3	1	255	27.8	8.1	8.78	3
FALSE	High	Master Protein	Q15435	Protein phosphatase 1 regulatory subunit 7 OS=Homo sapiens GN=PPP1R7 PE=1 SV=1	0	10.831	8	3	3	3	1	360	41.5	4.91	5.12	3
FALSE	High	Master Protein	P46778	60S ribosomal protein L21 OS=Homo sapiens GN=RPL21 PE=1 SV=2	0	23.119	28	3	9	3	1	160	18.6	10.49	13.48	3
FALSE	High	Master Protein	Q13162	Peroxiredoxin-4 OS=Homo sapiens GN=PRDX4 PE=1 SV=1	0	20.331	21	5	8	3	1	271	30.5	6.29	12.59	5
FALSE	High	Master Protein	Q9UBX3	Mitochondrial dicarboxylate carrier OS=Homo sapiens GN=SLC25A10 PE=1 SV=2	0	10.54	17	3	3	3	1	287	31.3	9.54	1.92	3
FALSE	High	Master Protein	O60547	GDP-mannose 4,6 dehydratase OS=Homo sapiens GN=GMDS PE=1 SV=1	0	10.594	11	3	3	3	1	372	41.9	7.31	4.05	3
FALSE	High	Master Protein	P07311	Acylphosphatase-1 OS=Homo sapiens GN=ACYP1 PE=1 SV=2	0	8.782	32	3	3	3	1	99	11.3	9.31	5.48	3
FALSE	High	Master Protein	P51649	Succinate-semialdehyde dehydrogenase, mitochondrial OS=Homo sapiens GN=ALDH5A1 PE=1 SV=2	0	6.835	9	3	3	3	1	535	57.2	8.28	1.69	3
FALSE	High	Master Protein	Q9BVK6	Transmembrane emp24 domain-containing protein 9 OS=Homo sapiens GN=TMED9 PE=1 SV=2	0	8.994	16	3	3	3	1	235	27.3	8.02	2.72	3
FALSE	High	Master Protein	P82979	SAP domain-containing ribonucleoprotein OS=Homo sapiens GN=SARNP PE=1 SV=3	0	14.564	19	3	3	3	1	210	23.7	6.42	4.68	3
FALSE	High	Master Protein	P61254	60S ribosomal protein L26 OS=Homo sapiens GN=RPL26 PE=1 SV=1	0	6.872	12	3	4	3	1	145	17.2	10.55	5.87	3
FALSE	High	Master Protein	O75821	Eukaryotic translation initiation factor 3 subunit G OS=Homo sapiens GN=EIF3G PE=1 SV=2	0	8.878	22	3	3	3	1	320	35.6	6.13	1.66	3
FALSE	High	Master Protein	P42167	Lamina-associated polypeptide 2, isoforms beta/gamma OS=Homo sapiens GN=TMPO PE=1 SV=2	0	51.234	37	10	11	3	1	454	50.6	9.38	28.46	10
FALSE	High	Master Protein	Q13094	Lymphocyte cytosolic protein 2 OS=Homo sapiens GN=LCP2 PE=1 SV=1	0.001	4.949	8	3	3	3	1	533	60.2	6.27	1.76	3
FALSE	High	Master Protein	O95630	STAM-binding protein OS=Homo sapiens GN=STAMBP PE=1 SV=1	0	7.514	11	3	3	3	1	424	48	6.29	0	3
FALSE	High	Master Protein	Q15052	Rho guanine nucleotide exchange factor 6 OS=Homo sapiens GN=ARHGEF6 PE=1 SV=2	0	9.135	6	3	3	3	1	776	87.4	6.05	2.81	3
FALSE	High	Master Protein	Q6PKG0	La-related protein 1 OS=Homo sapiens GN=LARP1 PE=1 SV=2	0	9.213	4	3	3	3	1	1096	123.4	8.82	4.27	3
FALSE	High	Master Protein	Q9HD45	Transmembrane 9 superfamily member 3 OS=Homo sapiens GN=TM9SF3 PE=1 SV=2	0	8.121	5	3	4	3	1	589	67.8	7.21	1.87	3
FALSE	High	Master Protein	P49247	Ribose-5-phosphate isomerase OS=Homo sapiens GN=RPIA PE=1 SV=3	0	12.123	11	3	3	3	1	311	33.2	8.54	5.68	3
FALSE	High	Master Protein	Q14684	Ribosomal RNA processing protein 1 homolog B OS=Homo sapiens GN=RRP1B PE=1 SV=3	0	7.463	6	3	3	3	1	758	84.4	9.76	0	3
FALSE	High	Master Protein	Q92804	TATA-binding protein-associated factor 2N OS=Homo sapiens GN=TAF15 PE=1 SV=1	0	20.837	17	5	7	3	1	592	61.8	8.02	13.69	5
FALSE	High	Master Protein	P49711	Transcriptional repressor CTCF OS=Homo sapiens GN=CTCF PE=1 SV=1	0	10.83	8	3	3	3	1	727	82.7	6.96	2.94	3
FALSE	High	Master Protein	P61011	Signal recognition particle 54 kDa protein OS=Homo sapiens GN=SRP54 PE=1 SV=1	0	12.098	7	3	3	3	1	504	55.7	8.75	1.88	3
FALSE	High	Master Protein	O75489	NADH dehydrogenase [ubiquinone] iron-sulfur protein 3, mitochondrial OS=Homo sapiens GN=NDUFS3 PE=1 SV=1	0	10.891	17	3	3	3	1	264	30.2	7.5	2.14	3
FALSE	High	Master Protein	P0DME0	Protein SETSIP OS=Homo sapiens GN=SETSIP PE=1 SV=1	0	13.21	12	3	6	3	1	302	34.9	4.31	7.48	3
FALSE	High	Master Protein	P55809	Succinyl-CoA:3-ketoacid coenzyme A transferase 1, mitochondrial OS=Homo sapiens GN=OXCT1 PE=1 SV=1	0	20.234	12	3	4	3	1	520	56.1	7.46	8.47	3
FALSE	High	Master Protein	Q9NZ08	Endoplasmic reticulum aminopeptidase 1 OS=Homo sapiens GN=ERAP1 PE=1 SV=3	0	7.144	4	3	3	3	1	941	107.2	6.46	2.52	3
FALSE	High	Master Protein	O43169	Cytochrome b5 type B OS=Homo sapiens GN=CYB5B PE=1 SV=2	0	11.791	38	3	4	3	1	146	16.3	4.97	8.8	3
FALSE	High	Master Protein	Q9NR56	Muscleblind-like protein 1 OS=Homo sapiens GN=MBNL1 PE=1 SV=2	0	7.498	10	3	3	3	1	388	41.8	8.9	3.36	3
FALSE	High	Master Protein	P13861	cAMP-dependent protein kinase type II-alpha regulatory subunit OS=Homo sapiens GN=PRKAR2A PE=1 SV=2	0	9.506	10	3	3	3	1	404	45.5	5.07	4.7	3
FALSE	High	Master Protein	P62736	Actin, aortic smooth muscle OS=Homo sapiens GN=ACTA2 PE=1 SV=1	0	62.638	29	8	91	3	1	377	42	5.39	128.31	8
FALSE	High	Master Protein	P17858	ATP-dependent 6-phosphofructokinase, liver type OS=Homo sapiens GN=PFKL PE=1 SV=6	0	17.503	8	4	5	3	1	780	85	7.5	4.27	4
FALSE	High	Master Protein	Q14978	Nucleolar and coiled-body phosphoprotein 1 OS=Homo sapiens GN=NOLC1 PE=1 SV=2	0	6.239	6	3	4	3	1	699	73.6	9.47	1.81	3
FALSE	High	Master Protein	Q9UBQ0	Vacuolar protein sorting-associated protein 29 OS=Homo sapiens GN=VPS29 PE=1 SV=1	0	14.127	20	3	4	3	1	182	20.5	6.79	2.2	3
FALSE	High	Master Protein	P37108	Signal recognition particle 14 kDa protein OS=Homo sapiens GN=SRP14 PE=1 SV=2	0	8.287	15	3	5	3	1	136	14.6	10.04	4.19	3
FALSE	High	Master Protein	O15372	Eukaryotic translation initiation factor 3 subunit H OS=Homo sapiens GN=EIF3H PE=1 SV=1	0	10.94	11	3	5	3	1	352	39.9	6.54	4.16	3
FALSE	High	Master Protein	P62158	Calmodulin OS=Homo sapiens GN=CALM1 PE=1 SV=2	0	18.207	31	3	5	3	1	149	16.8	4.22	6.9	3
FALSE	High	Master Protein	P04439	HLA class I histocompatibility antigen, A-3 alpha chain OS=Homo sapiens GN=HLA-A PE=1 SV=2	0	36.408	36	8	9	3	1	365	40.8	6	16.84	8
FALSE	High	Master Protein	Q9NTJ5	Phosphatidylinositide phosphatase SAC1 OS=Homo sapiens GN=SACM1L PE=1 SV=2	0	11.343	6	3	3	3	1	587	66.9	7.12	5.89	3
FALSE	High	Master Protein	Q8WWY3	U4/U6 small nuclear ribonucleoprotein Prp31 OS=Homo sapiens GN=PRPF31 PE=1 SV=2	0	6.108	10	3	3	3	1	499	55.4	5.78	0	3
FALSE	High	Master Protein	P62861	40S ribosomal protein S30 OS=Homo sapiens GN=FAU PE=1 SV=1	0	10.956	20	3	6	3	1	59	6.6	12.15	6.34	3
FALSE	High	Master Protein	Q9NVJ2	ADP-ribosylation factor-like protein 8B OS=Homo sapiens GN=ARL8B PE=1 SV=1	0	8.815	19	3	3	3	1	186	21.5	8.43	1.95	3
FALSE	High	Master Protein	Q32MZ4	Leucine-rich repeat flightless-interacting protein 1 OS=Homo sapiens GN=LRRFIP1 PE=1 SV=2	0	12.253	9	3	3	3	1	808	89.2	4.65	2.55	3
FALSE	High	Master Protein	Q9P287	BRCA2 and CDKN1A-interacting protein OS=Homo sapiens GN=BCCIP PE=1 SV=1	0	10.97	17	3	3	3	1	314	36	4.61	3.36	3
FALSE	High	Master Protein	P40938	Replication factor C subunit 3 OS=Homo sapiens GN=RFC3 PE=1 SV=2	0	17.262	15	3	3	3	1	356	40.5	8.34	5.48	3
FALSE	High	Master Protein	P63173	60S ribosomal protein L38 OS=Homo sapiens GN=RPL38 PE=1 SV=2	0	17.867	49	3	7	3	1	70	8.2	10.1	10.13	3
FALSE	High	Master Protein	P28065	Proteasome subunit beta type-9 OS=Homo sapiens GN=PSMB9 PE=1 SV=2	0	9.046	19	3	3	3	1	219	23.3	5.03	2.15	3
FALSE	High	Master Protein	Q86YV0	RAS protein activator like-3 OS=Homo sapiens GN=RASAL3 PE=1 SV=2	0	19.037	4	3	4	3	1	1011	111.8	8.75	6.66	3
FALSE	High	Master Protein	Q9UKF6	Cleavage and polyadenylation specificity factor subunit 3 OS=Homo sapiens GN=CPSF3 PE=1 SV=1	0	9.866	8	3	3	3	1	684	77.4	5.6	0	3
FALSE	High	Master Protein	Q8TC12	Retinol dehydrogenase 11 OS=Homo sapiens GN=RDH11 PE=1 SV=2	0	12.652	12	3	3	3	1	318	35.4	8.82	6.01	3
FALSE	High	Master Protein	O95319	CUGBP Elav-like family member 2 OS=Homo sapiens GN=CELF2 PE=1 SV=1	0	18.751	10	4	5	3	1	508	54.3	8.76	8.06	4
FALSE	High	Master Protein	O60749	Sorting nexin-2 OS=Homo sapiens GN=SNX2 PE=1 SV=2	0	8.863	7	3	3	3	1	519	58.4	5.12	3.29	3
FALSE	High	Master Protein	Q9BV57	1,2-dihydroxy-3-keto-5-methylthiopentene dioxygenase OS=Homo sapiens GN=ADI1 PE=1 SV=1	0	9.307	18	3	3	3	1	179	21.5	5.68	4.01	3
FALSE	High	Master Protein	P00761	Trypsin OS=Sus scrofa PE=1 SV=1	0	40.411	21	3	15	3	1	231	24.4	7.18	49.47	3
FALSE	High	Master Protein	Q05086	Ubiquitin-protein ligase E3A OS=Homo sapiens GN=UBE3A PE=1 SV=4	0	9.645	6	3	3	3	1	875	100.6	5.22	0	3
FALSE	High	Master Protein	P62304	Small nuclear ribonucleoprotein E OS=Homo sapiens GN=SNRPE PE=1 SV=1	0	20.731	52	3	10	3	1	92	10.8	9.44	14.23	3
FALSE	High	Master Protein	O95571	Persulfide dioxygenase ETHE1, mitochondrial OS=Homo sapiens GN=ETHE1 PE=1 SV=2	0	10.426	17	3	3	3	1	254	27.9	6.83	2.07	3
FALSE	High	Master Protein	Q9NS69	Mitochondrial import receptor subunit TOM22 homolog OS=Homo sapiens GN=TOMM22 PE=1 SV=3	0	14.65	43	3	3	3	1	142	15.5	4.34	3.89	3
FALSE	High	Master Protein	Q9H307	Pinin OS=Homo sapiens GN=PNN PE=1 SV=4	0	9.379	7	3	3	3	1	717	81.6	7.14	2.73	3
FALSE	High	Master Protein	Q9Y5S9	RNA-binding protein 8A OS=Homo sapiens GN=RBM8A PE=1 SV=1	0	16.559	22	3	5	3	1	174	19.9	5.72	11.68	3
FALSE	High	Master Protein	O60763	General vesicular transport factor p115 OS=Homo sapiens GN=USO1 PE=1 SV=2	0	7.36	4	3	3	3	1	962	107.8	4.91	4.16	3
FALSE	High	Master Protein	P60520	Gamma-aminobutyric acid receptor-associated protein-like 2 OS=Homo sapiens GN=GABARAPL2 PE=1 SV=1	0	9.037	17	3	4	3	1	117	13.7	8.1	3.52	3
FALSE	High	Master Protein	Q9Y3U8	60S ribosomal protein L36 OS=Homo sapiens GN=RPL36 PE=1 SV=3	0	10.858	30	3	8	3	1	105	12.2	11.59	13.59	3
FALSE	High	Master Protein	P67870	Casein kinase II subunit beta OS=Homo sapiens GN=CSNK2B PE=1 SV=1	0	9.873	24	3	3	3	1	215	24.9	5.55	2.5	3
FALSE	High	Master Protein	O43818	U3 small nucleolar RNA-interacting protein 2 OS=Homo sapiens GN=RRP9 PE=1 SV=1	0	7.81	7	3	3	3	1	475	51.8	7.85	2.25	3
FALSE	High	Master Protein	Q9P289	Serine/threonine-protein kinase 26 OS=Homo sapiens GN=STK26 PE=1 SV=2	0	10.376	9	3	4	3	1	416	46.5	5.29	0	3
FALSE	High	Master Protein	Q9Y4K1	Absent in melanoma 1 protein OS=Homo sapiens GN=AIM1 PE=1 SV=3	0	6.419	3	3	3	3	1	1723	188.6	5.86	0	3
FALSE	High	Master Protein	P12236	ADP/ATP translocase 3 OS=Homo sapiens GN=SLC25A6 PE=1 SV=4	0	23.651	27	6	10	3	1	298	32.8	9.74	10.59	6
FALSE	High	Master Protein	Q9BPW8	Protein NipSnap homolog 1 OS=Homo sapiens GN=NIPSNAP1 PE=1 SV=1	0	11.079	19	4	4	3	1	284	33.3	9.31	0	4
FALSE	High	Master Protein	Q9Y3B3	Transmembrane emp24 domain-containing protein 7 OS=Homo sapiens GN=TMED7 PE=1 SV=2	0	10.858	16	3	3	3	1	224	25.2	6.89	2.47	3
FALSE	High	Master Protein	P57088	Transmembrane protein 33 OS=Homo sapiens GN=TMEM33 PE=1 SV=2	0	12.627	12	3	5	3	1	247	28	9.7	7.13	3
FALSE	High	Master Protein	P61204	ADP-ribosylation factor 3 OS=Homo sapiens GN=ARF3 PE=1 SV=2	0	30.9	39	5	12	3	1	181	20.6	7.43	27.93	5
FALSE	High	Master Protein	O95816	BAG family molecular chaperone regulator 2 OS=Homo sapiens GN=BAG2 PE=1 SV=1	0	10.102	17	3	3	3	1	211	23.8	6.7	2.67	3
FALSE	High	Master Protein	O43290	U4/U6.U5 tri-snRNP-associated protein 1 OS=Homo sapiens GN=SART1 PE=1 SV=1	0	6.797	5	3	3	3	1	800	90.2	6.13	4.19	3
FALSE	High	Master Protein	P62847	40S ribosomal protein S24 OS=Homo sapiens GN=RPS24 PE=1 SV=1	0	22.599	29	3	13	3	1	133	15.4	10.78	17.1	3
FALSE	High	Master Protein	Q05519	Serine/arginine-rich splicing factor 11 OS=Homo sapiens GN=SRSF11 PE=1 SV=1	0	15.201	11	3	4	3	1	484	53.5	10.52	8.89	3
FALSE	High	Master Protein	P52298	Nuclear cap-binding protein subunit 2 OS=Homo sapiens GN=NCBP2 PE=1 SV=1	0	10.691	22	3	3	3	1	156	18	8.21	5.3	3
FALSE	High	Master Protein	Q14258	E3 ubiquitin/ISG15 ligase TRIM25 OS=Homo sapiens GN=TRIM25 PE=1 SV=2	0	7.804	6	3	3	3	1	630	70.9	8.09	0	3
FALSE	High	Master Protein	Q15369	Elongin-C OS=Homo sapiens GN=ELOC PE=1 SV=1	0	15.649	42	3	5	3	1	112	12.5	4.78	4.52	3
FALSE	High	Master Protein	O60711	Leupaxin OS=Homo sapiens GN=LPXN PE=1 SV=1	0	14.141	13	3	3	3	1	386	43.3	6.01	7.64	3
FALSE	High	Master Protein	Q8NFH3	Nucleoporin Nup43 OS=Homo sapiens GN=NUP43 PE=1 SV=1	0	16.506	11	3	3	3	1	380	42.1	5.63	5.81	3
FALSE	High	Master Protein	Q13907	Isopentenyl-diphosphate Delta-isomerase 1 OS=Homo sapiens GN=IDI1 PE=1 SV=2	0	10.172	28	3	4	3	1	227	26.3	6.34	2.01	3
FALSE	High	Master Protein	Q9UBQ7	Glyoxylate reductase/hydroxypyruvate reductase OS=Homo sapiens GN=GRHPR PE=1 SV=1	0	19.571	22	3	3	3	1	328	35.6	7.39	8.35	3
FALSE	High	Master Protein	P49755	Transmembrane emp24 domain-containing protein 10 OS=Homo sapiens GN=TMED10 PE=1 SV=2	0	12.504	17	3	5	3	1	219	25	7.44	2.62	3
FALSE	High	Master Protein	Q14739	Lamin-B receptor OS=Homo sapiens GN=LBR PE=1 SV=2	0	10.478	6	3	5	3	1	615	70.7	9.36	2.43	3
FALSE	High	Master Protein	Q8NBX0	Saccharopine dehydrogenase-like oxidoreductase OS=Homo sapiens GN=SCCPDH PE=1 SV=1	0	6.926	11	3	3	3	1	429	47.1	9.14	0	3
FALSE	High	Master Protein	Q86UE4	Protein LYRIC OS=Homo sapiens GN=MTDH PE=1 SV=2	0	8.928	10	3	3	3	1	582	63.8	9.32	2.42	3
FALSE	High	Master Protein	Q5BKZ1	DBIRD complex subunit ZNF326 OS=Homo sapiens GN=ZNF326 PE=1 SV=2	0	8.431	5	3	3	3	1	582	65.6	5.15	1.7	3
FALSE	High	Master Protein	P52294	Importin subunit alpha-5 OS=Homo sapiens GN=KPNA1 PE=1 SV=3	0	11.347	9	3	3	3	1	538	60.2	5.01	4.26	3
FALSE	High	Master Protein	O43847	Nardilysin OS=Homo sapiens GN=NRDC PE=1 SV=2	0	6.855	3	3	3	3	1	1150	131.5	5	3.76	3
FALSE	High	Master Protein	Q8NFH4	Nucleoporin Nup37 OS=Homo sapiens GN=NUP37 PE=1 SV=1	0	8.433	12	3	3	3	1	326	36.7	5.92	0	3
FALSE	High	Master Protein	P05386	60S acidic ribosomal protein P1 OS=Homo sapiens GN=RPLP1 PE=1 SV=1	0	23.918	53	3	6	3	1	114	11.5	4.32	15.96	3
FALSE	High	Master Protein	Q7Z3B4	Nucleoporin p54 OS=Homo sapiens GN=NUP54 PE=1 SV=2	0	8.43	6	3	3	3	1	507	55.4	7.02	1.7	3
FALSE	High	Master Protein	Q9BXY0	Protein MAK16 homolog OS=Homo sapiens GN=MAK16 PE=1 SV=2	0	10.697	13	3	3	3	1	300	35.3	5.38	2.73	3
FALSE	High	Master Protein	Q9P016	Thymocyte nuclear protein 1 OS=Homo sapiens GN=THYN1 PE=1 SV=1	0	6.767	11	3	4	3	1	225	25.7	9.25	1.8	3
FALSE	High	Master Protein	Q5JWF2	Guanine nucleotide-binding protein G(s) subunit alpha isoforms XLas OS=Homo sapiens GN=GNAS PE=1 SV=2	0	17.383	5	4	5	3	1	1037	111	5.03	9.32	4
FALSE	High	Master Protein	Q7L0Y3	Mitochondrial ribonuclease P protein 1 OS=Homo sapiens GN=TRMT10C PE=1 SV=2	0	10.981	13	3	3	3	1	403	47.3	9.36	2.61	3
FALSE	High	Master Protein	Q13098	COP9 signalosome complex subunit 1 OS=Homo sapiens GN=GPS1 PE=1 SV=4	0	9.042	10	3	3	3	1	491	55.5	6.74	2.36	3
FALSE	High	Master Protein	Q02978	Mitochondrial 2-oxoglutarate/malate carrier protein OS=Homo sapiens GN=SLC25A11 PE=1 SV=3	0	15.339	12	3	4	3	1	314	34	9.91	2.68	3
FALSE	High	Master Protein	P46783	40S ribosomal protein S10 OS=Homo sapiens GN=RPS10 PE=1 SV=1	0	18.813	15	3	7	3	1	165	18.9	10.15	13.03	3
FALSE	High	Master Protein	Q9NVP1	ATP-dependent RNA helicase DDX18 OS=Homo sapiens GN=DDX18 PE=1 SV=2	0	8.428	12	3	3	3	1	670	75.4	9.5	3.17	3
FALSE	High	Master Protein	Q9NQC3	Reticulon-4 OS=Homo sapiens GN=RTN4 PE=1 SV=2	0	23.425	7	3	5	3	1	1192	129.9	4.5	11.26	3
FALSE	High	Master Protein	Q99436	Proteasome subunit beta type-7 OS=Homo sapiens GN=PSMB7 PE=1 SV=1	0	9.784	29	3	4	3	1	277	29.9	7.68	2.49	3
FALSE	High	Master Protein	P62328	Thymosin beta-4 OS=Homo sapiens GN=TMSB4X PE=1 SV=2	0	28.862	55	3	9	3	1	44	5.1	5.06	25.1	3
FALSE	High	Master Protein	O75521	Enoyl-CoA delta isomerase 2, mitochondrial OS=Homo sapiens GN=ECI2 PE=1 SV=4	0	10.459	15	3	3	3	1	394	43.6	9	5.57	3
FALSE	High	Master Protein	P78559	Microtubule-associated protein 1A OS=Homo sapiens GN=MAP1A PE=1 SV=6	0	10.238	2	3	3	3	1	2803	305.3	4.92	4.16	3
FALSE	High	Master Protein	P28288	ATP-binding cassette sub-family D member 3 OS=Homo sapiens GN=ABCD3 PE=1 SV=1	0	9.839	8	3	4	3	1	659	75.4	9.36	1.82	3
FALSE	High	Master Protein	P62318	Small nuclear ribonucleoprotein Sm D3 OS=Homo sapiens GN=SNRPD3 PE=1 SV=1	0	18.191	32	3	7	3	1	126	13.9	10.32	17.06	3
FALSE	High	Master Protein	Q99848	Probable rRNA-processing protein EBP2 OS=Homo sapiens GN=EBNA1BP2 PE=1 SV=2	0	10.849	11	3	3	3	1	306	34.8	10.1	2.21	3
FALSE	High	Master Protein	Q9Y294	Histone chaperone ASF1A OS=Homo sapiens GN=ASF1A PE=1 SV=1	0	14.234	44	3	3	3	1	204	23	4.41	2.87	3
FALSE	High	Master Protein	Q6DD88	Atlastin-3 OS=Homo sapiens GN=ATL3 PE=1 SV=1	0	11.234	7	3	3	3	1	541	60.5	5.66	2.92	3
FALSE	High	Master Protein	Q8N1N4	Keratin, type II cytoskeletal 78 OS=Homo sapiens GN=KRT78 PE=2 SV=2	0	8.298	6	3	3	3	1	520	56.8	6.02	1.88	3
FALSE	High	Master Protein	Q9Y5Z4	Heme-binding protein 2 OS=Homo sapiens GN=HEBP2 PE=1 SV=1	0	11.344	18	3	3	3	1	205	22.9	4.63	4.21	3
FALSE	High	Master Protein	P54105	Methylosome subunit pICln OS=Homo sapiens GN=CLNS1A PE=1 SV=1	0	17.157	30	3	3	3	1	237	26.2	4.11	5.03	3
FALSE	High	Master Protein	Q9NZ01	Very-long-chain enoyl-CoA reductase OS=Homo sapiens GN=TECR PE=1 SV=1	0	8.444	12	3	4	3	1	308	36	9.45	1.99	3
FALSE	High	Master Protein	Q9Y5Y2	Cytosolic Fe-S cluster assembly factor NUBP2 OS=Homo sapiens GN=NUBP2 PE=1 SV=1	0	14.887	25	3	3	3	1	271	28.8	5.83	6.02	3
FALSE	High	Master Protein	Q13509	Tubulin beta-3 chain OS=Homo sapiens GN=TUBB3 PE=1 SV=2	0	144.695	41	16	100	3	1	450	50.4	4.93	212.02	16
FALSE	High	Master Protein	Q9NR31	GTP-binding protein SAR1a OS=Homo sapiens GN=SAR1A PE=1 SV=1	0	7.504	20	3	4	3	1	198	22.4	6.68	3.7	3
FALSE	High	Master Protein	Q9Y5X3	Sorting nexin-5 OS=Homo sapiens GN=SNX5 PE=1 SV=1	0	7.981	10	3	4	3	1	404	46.8	6.76	1.7	3
FALSE	High	Master Protein	Q96J01	THO complex subunit 3 OS=Homo sapiens GN=THOC3 PE=1 SV=1	0	7.916	11	3	3	3	1	351	38.7	6.09	2.85	3
FALSE	High	Master Protein	Q15021	Condensin complex subunit 1 OS=Homo sapiens GN=NCAPD2 PE=1 SV=3	0	12.11	2	3	3	3	1	1401	157.1	6.61	2.51	3
FALSE	High	Master Protein	O43660	Pleiotropic regulator 1 OS=Homo sapiens GN=PLRG1 PE=1 SV=1	0	10.752	11	3	3	3	1	514	57.2	9.17	3.48	3
FALSE	High	Master Protein	Q7Z7K6	Centromere protein V OS=Homo sapiens GN=CENPV PE=1 SV=1	0	13.24	17	3	3	3	1	275	29.9	9.73	5.08	3
FALSE	High	Master Protein	Q9UQE7	Structural maintenance of chromosomes protein 3 OS=Homo sapiens GN=SMC3 PE=1 SV=2	0	8.599	3	3	3	3	1	1217	141.5	7.18	0	3
FALSE	High	Master Protein	Q09028	Histone-binding protein RBBP4 OS=Homo sapiens GN=RBBP4 PE=1 SV=3	0	33.678	22	7	16	3	1	425	47.6	4.89	20.48	7
FALSE	High	Master Protein	O43615	Mitochondrial import inner membrane translocase subunit TIM44 OS=Homo sapiens GN=TIMM44 PE=1 SV=2	0	7.416	8	3	3	3	1	452	51.3	8.32	0	3
FALSE	High	Master Protein	P30040	Endoplasmic reticulum resident protein 29 OS=Homo sapiens GN=ERP29 PE=1 SV=4	0	9.782	11	3	3	3	1	261	29	7.31	5.97	3
FALSE	High	Master Protein	A0AVT1	Ubiquitin-like modifier-activating enzyme 6 OS=Homo sapiens GN=UBA6 PE=1 SV=1	0	7.928	3	3	3	3	1	1052	117.9	6.14	2.53	3
FALSE	High	Master Protein	Q96I25	Splicing factor 45 OS=Homo sapiens GN=RBM17 PE=1 SV=1	0	10.745	9	3	4	3	1	401	44.9	5.97	2.47	3
FALSE	High	Master Protein	Q5TDH0	Protein DDI1 homolog 2 OS=Homo sapiens GN=DDI2 PE=1 SV=1	0	12.008	11	3	3	3	1	399	44.5	5.05	3.92	3
FALSE	High	Master Protein	Q9H0S4	Probable ATP-dependent RNA helicase DDX47 OS=Homo sapiens GN=DDX47 PE=1 SV=1	0	7.555	10	3	3	3	1	455	50.6	9.1	4.34	3
FALSE	High	Master Protein	P22090	40S ribosomal protein S4, Y isoform 1 OS=Homo sapiens GN=RPS4Y1 PE=1 SV=2	0	15.775	21	5	8	3	1	263	29.4	10.24	4.28	5
FALSE	High	Master Protein	Q9HB07	UPF0160 protein MYG1, mitochondrial OS=Homo sapiens GN=C12orf10 PE=1 SV=2	0	11.976	10	3	3	3	1	376	42.4	6.67	4.68	3
FALSE	High	Master Protein	P60866	40S ribosomal protein S20 OS=Homo sapiens GN=RPS20 PE=1 SV=1	0	25.351	23	3	11	3	1	119	13.4	9.94	16.72	3
FALSE	High	Master Protein	P42766	60S ribosomal protein L35 OS=Homo sapiens GN=RPL35 PE=1 SV=2	0	11.857	19	3	4	3	1	123	14.5	11.05	2.96	3
FALSE	High	Master Protein	O15212	Prefoldin subunit 6 OS=Homo sapiens GN=PFDN6 PE=1 SV=1	0	8.779	36	3	3	3	1	129	14.6	8.88	6.7	3
FALSE	High	Master Protein	Q13838	Spliceosome RNA helicase DDX39B OS=Homo sapiens GN=DDX39B PE=1 SV=1	0	68.199	30	10	28	3	1	428	49	5.67	36.67	10
FALSE	High	Master Protein	O75390	Citrate synthase, mitochondrial OS=Homo sapiens GN=CS PE=1 SV=2	0	15.999	8	3	5	3	1	466	51.7	8.32	10.05	3
FALSE	High	Master Protein	P24941	Cyclin-dependent kinase 2 OS=Homo sapiens GN=CDK2 PE=1 SV=2	0	13.252	21	4	6	3	1	298	33.9	8.68	1.74	4
FALSE	High	Master Protein	Q16630	Cleavage and polyadenylation specificity factor subunit 6 OS=Homo sapiens GN=CPSF6 PE=1 SV=2	0	12.194	10	3	3	3	1	551	59.2	7.15	2.29	3
FALSE	High	Master Protein	O15042	U2 snRNP-associated SURP motif-containing protein OS=Homo sapiens GN=U2SURP PE=1 SV=2	0.001	5.689	5	3	3	3	1	1029	118.2	8.47	0	3
FALSE	High	Master Protein	Q15003	Condensin complex subunit 2 OS=Homo sapiens GN=NCAPH PE=1 SV=3	0	10.279	7	3	3	3	1	741	82.5	5.06	2.84	3
FALSE	High	Master Protein	Q9H3N1	Thioredoxin-related transmembrane protein 1 OS=Homo sapiens GN=TMX1 PE=1 SV=1	0	8.946	13	3	4	3	1	280	31.8	4.98	2.56	3
FALSE	High	Master Protein	P05556	Integrin beta-1 OS=Homo sapiens GN=ITGB1 PE=1 SV=2	0	8.254	5	3	4	3	1	798	88.4	5.39	0	3
FALSE	High	Master Protein	P00441	Superoxide dismutase [Cu-Zn] OS=Homo sapiens GN=SOD1 PE=1 SV=2	0	30.295	39	3	5	3	1	154	15.9	6.13	24.73	3
FALSE	High	Master Protein	O00505	Importin subunit alpha-4 OS=Homo sapiens GN=KPNA3 PE=1 SV=2	0	6.993	14	3	3	3	1	521	57.8	4.94	1.77	3
FALSE	High	Master Protein	Q13123	Protein Red OS=Homo sapiens GN=IK PE=1 SV=3	0	11.234	7	3	3	3	1	557	65.6	6.64	6.74	3
FALSE	High	Master Protein	P80303	Nucleobindin-2 OS=Homo sapiens GN=NUCB2 PE=1 SV=2	0	10.086	11	3	3	3	1	420	50.2	5.12	1.96	3
FALSE	High	Master Protein	Q92621	Nuclear pore complex protein Nup205 OS=Homo sapiens GN=NUP205 PE=1 SV=3	0	8.727	1	3	3	3	1	2012	227.8	6.19	0	3
FALSE	High	Master Protein	Q9UJU2	Lymphoid enhancer-binding factor 1 OS=Homo sapiens GN=LEF1 PE=1 SV=1	0	13.399	12	3	3	3	1	399	44.2	7.42	5.18	3
FALSE	High	Master Protein	Q13243	Serine/arginine-rich splicing factor 5 OS=Homo sapiens GN=SRSF5 PE=1 SV=1	0	15.885	17	4	4	3	1	272	31.2	11.59	3.78	4
FALSE	High	Master Protein	O95865	N(G),N(G)-dimethylarginine dimethylaminohydrolase 2 OS=Homo sapiens GN=DDAH2 PE=1 SV=1	0	10.413	16	3	3	3	1	285	29.6	6.01	3.98	3
FALSE	High	Master Protein	Q9NY12	H/ACA ribonucleoprotein complex subunit 1 OS=Homo sapiens GN=GAR1 PE=1 SV=1	0	7.86	21	3	3	3	1	217	22.3	10.92	2.56	3
FALSE	High	Master Protein	Q8N7H5	RNA polymerase II-associated factor 1 homolog OS=Homo sapiens GN=PAF1 PE=1 SV=2	0	10.899	11	3	3	3	1	531	59.9	4.63	0	3
FALSE	High	Master Protein	P98179	RNA-binding protein 3 OS=Homo sapiens GN=RBM3 PE=1 SV=1	0	14.4	41	3	6	3	1	157	17.2	8.91	2.65	3
FALSE	High	Master Protein	Q93009	Ubiquitin carboxyl-terminal hydrolase 7 OS=Homo sapiens GN=USP7 PE=1 SV=2	0	10.243	5	3	3	3	1	1102	128.2	5.55	2.3	3
FALSE	High	Master Protein	P46776	60S ribosomal protein L27a OS=Homo sapiens GN=RPL27A PE=1 SV=2	0	11.299	22	3	4	3	1	148	16.6	11	9.56	3
FALSE	High	Master Protein	Q96QK1	Vacuolar protein sorting-associated protein 35 OS=Homo sapiens GN=VPS35 PE=1 SV=2	0	14.784	5	3	3	3	1	796	91.6	5.49	6.77	3
FALSE	High	Master Protein	Q01826	DNA-binding protein SATB1 OS=Homo sapiens GN=SATB1 PE=1 SV=1	0	10.959	7	3	3	3	1	763	85.9	6.54	1.75	3
FALSE	High	Master Protein	Q86SX6	Glutaredoxin-related protein 5, mitochondrial OS=Homo sapiens GN=GLRX5 PE=1 SV=2	0	10.486	25	3	4	3	1	157	16.6	6.79	2.17	3
FALSE	High	Master Protein	Q8WYA6	Beta-catenin-like protein 1 OS=Homo sapiens GN=CTNNBL1 PE=1 SV=1	0	9.93	6	3	3	3	1	563	65.1	5.05	3.71	3
FALSE	High	Master Protein	P50213	Isocitrate dehydrogenase [NAD] subunit alpha, mitochondrial OS=Homo sapiens GN=IDH3A PE=1 SV=1	0	11.329	8	3	3	3	1	366	39.6	6.92	4.16	3
FALSE	High	Master Protein	Q92882	Osteoclast-stimulating factor 1 OS=Homo sapiens GN=OSTF1 PE=1 SV=2	0	9.611	21	3	3	3	1	214	23.8	5.68	2.16	3
FALSE	High	Master Protein	Q9NYB0	Telomeric repeat-binding factor 2-interacting protein 1 OS=Homo sapiens GN=TERF2IP PE=1 SV=1	0	19.908	15	3	3	3	1	399	44.2	4.73	8.28	3
FALSE	High	Master Protein	O00116	Alkyldihydroxyacetonephosphate synthase, peroxisomal OS=Homo sapiens GN=AGPS PE=1 SV=1	0	8.158	8	3	3	3	1	658	72.9	7.34	2.21	3
FALSE	High	Master Protein	Q9BZK7	F-box-like/WD repeat-containing protein TBL1XR1 OS=Homo sapiens GN=TBL1XR1 PE=1 SV=1	0	19.565	12	3	3	3	1	514	55.6	5.55	6.02	3
FALSE	High	Master Protein	O75663	TIP41-like protein OS=Homo sapiens GN=TIPRL PE=1 SV=2	0	7.203	12	3	4	3	1	272	31.4	5.91	3.27	3
FALSE	High	Master Protein	Q16836	Hydroxyacyl-coenzyme A dehydrogenase, mitochondrial OS=Homo sapiens GN=HADH PE=1 SV=3	0	7.236	15	3	3	3	1	314	34.3	8.85	2.33	3
FALSE	High	Master Protein	P42677	40S ribosomal protein S27 OS=Homo sapiens GN=RPS27 PE=1 SV=3	0	14.028	30	3	6	3	1	84	9.5	9.45	7.14	3
FALSE	High	Master Protein	Q16186	Proteasomal ubiquitin receptor ADRM1 OS=Homo sapiens GN=ADRM1 PE=1 SV=2	0	8.628	6	3	3	3	1	407	42.1	5.07	2.93	3
FALSE	High	Master Protein	Q07960	Rho GTPase-activating protein 1 OS=Homo sapiens GN=ARHGAP1 PE=1 SV=1	0	10.322	9	3	3	3	1	439	50.4	6.29	5.68	3
FALSE	High	Master Protein	Q71RC2	La-related protein 4 OS=Homo sapiens GN=LARP4 PE=1 SV=3	0	7.777	6	3	3	3	1	724	80.5	6.61	0	3
FALSE	High	Master Protein	Q92769	Histone deacetylase 2 OS=Homo sapiens GN=HDAC2 PE=1 SV=2	0	18.83	18	6	7	3	1	488	55.3	5.91	8.54	6
[truncated: 983 more rows]

## Sheet: 500 cells Urea-RG
Checked	Protein FDR Confidence: Combined	Master	Accession	Description	Exp. q-value: Combined	Sum PEP Score	Coverage [%]	# Peptides	# PSMs	# Unique Peptides	# Protein Groups	# AAs	MW [kDa]	calc. pI	Score Sequest HT: Sequest HT	# Peptides (by Search Engine): Sequest HT	Modifications
[truncated: 1,672 more rows]

[truncated: 14 more sheets: 500 cells Urea-BBS, 500 cells BBS #1, 500 cells BBS #2, 500 cells BBS #3, 100 cells BBS #1, 100 cells BBS #2, 100 cells BBS #3, Blank, 14k cells #1, 14k cells #2, 14k cells #3, 100 cells tube #1, 100 cells tube #2, 100 cells tube #3]
